# Supplementary material
Source: publisher figshare collection journal article supplement (https://osapublishing.figshare.com/ndownloader/files/12034598)
Supplement: Supplementary file 1 [file 12034598]

## Sheet:  Fig.1(a)
Small signal absorption									Wavelength (nm)	Unsaturable absorption (dB/m)
Wavelength (nm)	BEDF	EDF	BDF						976	9
600	43.2491	0.5566	42.82						1064	2.8
604	41.9073	0.61837	44.27						1260	1.4
608	40.75	0.78574	44.54						1300	1.62
612	39.9355	0.95311	42.95						1340	1.38
616	39.2306	1.2281	40.31						1400	2.36
620	38.4412	0.41518	37.76						1440	1.24
624	37.3954	0.7306	35.66						1480	1.18
628	36.0423	0.5	34.23						1520	1.17
632	34.3305	0.953	33.94						1530	1.171
636	32.7961	0.7379	33.2993						1540	1.09465
640	32.5202	1.2979	33.1446						1560	1.06
644	32.2443	2.875	32.9898						1580	1.04
648	31.851	4.082	32.374						1600	1.02
652	31.4368	6.318	31.6767
656	30.8568	6.194	30.9317
660	30.0994	5.503	30.1357
664	29.3603	3.806	29.3603
668	28.9207	2.627	28.9207
672	29.3206	1.998	29.3206
676	30.7052	1.1472	30.7052
680	32.0898	0.9436	32.0898
684	33.6493	0.8807	33.6493
688	35.3158	0.57073	35.3158
692	36.9824	0.56632	36.9824
696	37.991	0.41618	37.991
700	38.8739	0.57885	38.8739
704	39.0936	0.3685	39.0936
708	38.3738	0.678	38.3738
712	37.6539	0.6671	37.6539
716	36.9341	0.6273	36.9341
720	34.8358	0.5	34.8358
724	32.5217	0.55841	32.5217
728	30.3015	0.48595	30.3015
732	28.9609	0.6212	28.9609
736	27.564	0.4487	27.026
740	26.0915	0.45095	24.2917
744	24.2469	0.41735	21.5574
748	22.9216	0.51129	19.2996
752	22.0167	0.6086	17.7774
756	21.2071	0.6671	16.0621
760	20.7359	0.55019	15.6247
764	20.2646	0.57679	15.1874
768	19.7934	0.55588	14.8676
772	19.2798	0.509	14.5856
776	18.5932	0.50869	14.3036
780	17.9066	0.56753	14.0216
784	17.22	0.6409	13.7395
788	17.6	0.8572	13.4575
792	18.23	1.1103	13.5565
796	18.32	1.4168	13.6967
800	18.88	1.3366	13.8368
804	18.44	1.2735	13.977
808	17.92	1.1093	14.0537
812	17.52	0.9869	13.6761
816	16.76	0.823	13.2986
820	15.64	0.7574	12.921
824	13.77	0.651	12.4906
828	11.99	0.6095	11.7613
832	11.96	0.52548	11.0319
836	11.22	0.41377	10.3026
840	10.55	0.49125	9.71039
844	10.18	0.51492	9.71249
848	10.04	0.51492	9.71458
852	9.805	0.51492	9.71667
856	9.801	0.51492	9.71877
860	9.682	0.51492	9.64896
864	9.508	0.51492	9.4757
868	9.203	0.51492	9.30244
872	8.845	0.51492	8.90935
876	8.408	0.48158	8.38831
880	8.02	0.42443	7.92531
884	7.789	0.36728	7.82796
888	7.664	0.36343	7.73062
892	7.296	0.38066	7.53145
896	7.247	0.39789	7.25498
900	7.402	0.41512	7.1851
904	7.573	0.43235	7.14321
908	7.714	0.433	7.10133
912	7.571	0.433	7.05944
916	7.559	0.41915	7.01756
920	7.911	0.33523	6.98493
924	8.294	0.2513	6.9636
928	8.627	0.228	6.94228
932	8.854	0.2533	6.92095
936	9.186	0.2765	6.89962
940	9.2	0.3136	6.87716
944	9.069	0.2681	6.79789
948	9.057	0.3297	6.71862
952	9.049	0.42253	6.63935
956	9.253	0.6557	6.56009
960	9.468	0.9001	6.48082
964	9.643	1.3821	6.39937
968	10.38	1.912	6.29122
972	11.55	2.536	6.18307
976	11.71	3.093	6.07492
980	10.3	3.389	5.96677
984	8.354	3.123	5.85862
988	7.546	2.481	5.75709
992	7.278	1.766	5.68131
996	6.929	1.3525	5.60553
1000	6.528	1.0817	5.52975
1004	6.198	0.9697	5.45397
1008	5.753	0.7701	5.39669
1012	5.556	0.6204	5.35274
1016	5.447	0.50823	5.30878
1020	5.098	0.3487	5.26483
1024	5.026	0.267	5.22087
1028	4.966	0.2218	5.17692
1032	4.822	0.2113	5.13297
1036	4.67	0.2341	5.01857
1040	4.748	0.2203	4.89663
1044	4.591	0.168	4.77468
1048	4.585	0.1903	4.69876
1052	4.46	0.1703	4.62437
1056	4.427	0.2445	4.54999
1060	4.367	0.1651	4.4756
1064	4.253	0.2129	4.40121
1068	4.243	0.1854	4.3294
1072	4.174	0.2353	4.28152
1076	4.182	0.2163	4.23365
1080	3.96	0.1888	4.18578
1084	3.928	0.178	4.1379
1088	3.845	0.227	4.10762
1092	3.925	0.2148	4.07899
1096	3.86	0.2176	4.05037
1100	3.788	0.2345	3.98471
1104	3.81	0.231	3.88726
1108	3.776	0.2189	3.78981
1112	3.712	0.2182	3.70208
1116	3.724	0.2651	3.61465
1120	3.668	0.3204	3.52722
1124	3.605	0.2647	3.46853
1128	3.515	0.2751	3.42417
1132	3.498	0.3274	3.37981
1136	3.421	0.329	3.33545
1140	3.333	0.3496	3.29109
1144	3.258	0.2973	3.24272
1148	3.204	0.3396	3.17386
1152	3.097	0.3145	3.105
1156	3	0.3243	3.03614
1160	2.909	0.3445	2.96728
1164	2.847	0.3333	2.8955
1168	2.746	0.36	2.82123
1172	2.657	0.3436	2.74696
1176	2.618	0.3499	2.67269
1180	2.563	0.3881	2.59842
1184	2.503	0.3887	2.53799
1188	2.482	0.3891	2.4889
1192	2.453	0.42665	2.43981
1196	2.408	0.4269	2.39072
1200	2.376	0.42237	2.34163
1204	2.327	0.43954	2.29344
1208	2.272	0.43973	2.26395
1212	2.261	0.3918	2.23445
1216	2.162	0.42813	2.20496
1220	2.124	0.44044	2.17547
1224	2.105	0.44055	2.14597
1228	2.02	0.44784	2.11979
1232	1.99	0.47635	2.09569
1236	1.96	0.44808	2.07158
1240	1.921	0.46473	2.04748
1244	1.87	0.47193	2.02337
1248	1.834	0.44871	1.99926
1252	1.809	0.48837	1.97516
1256	1.796	0.43062	1.92858
1260	1.775	0.44247	1.87847
1264	1.772	0.45408	1.82836
1268	1.8	0.44983	1.8285
1272	1.837	0.48408	1.86787
1276	1.876	0.4319	1.90724
1280	1.926	0.46163	1.94661
1284	2.011	0.43912	1.98598
1288	2.089	0.43945	2.15874
1292	2.135	0.45965	2.3052
1296	2.19	0.48881	2.34672
1300	2.252	0.47319	2.38823
1304	2.325	0.48887	2.42975
1308	2.358	0.4488	2.47127
1312	2.392	0.471	2.51431
1316	2.389	0.48886	2.56395
1320	2.429	0.46655	2.61358
1324	2.442	0.43977	2.66322
1328	2.461	0.4509	2.71286
1332	2.474	0.462	2.76802
1336	2.494	0.47757	2.82744
1340	2.484	0.43248	2.88687
1344	2.531	0.42519	2.9463
1348	2.555	0.44741	3.00572
1352	2.582	0.378	3.08514
1356	2.618	0.4104	3.17942
1360	2.683	0.3865	3.2737
1364	2.79	0.41476	3.36798
1368	3.001	0.42948	3.48587
1372	3.408	0.52563	3.60721
1376	3.851	0.46215	3.72855
1380	4.267	0.46164	3.84988
1384	4.479	0.43509	3.95535
1388	4.377	0.55142	3.90509
1392	4.332	0.5	3.85483
1396	4.147	0.5	3.80457
1400	4.049	0.52963	3.7543
1404	4.016	0.55628	3.68208
1408	3.902	0.6043	3.56265
1412	3.809	0.613	3.44321
1416	3.636	0.6189	3.32378
1420	3.472	0.5709	3.20434
1424	3.347	0.6178	3.09975
1428	3.185	0.6343	3.00756
1432	2.99	0.7133	2.91536
1436	2.834	0.7754	2.82317
1440	2.719	0.8157	2.73097
1444	2.636	0.908	2.68413
1448	2.518	0.9945	2.65064
1452	2.416	1.1681	2.61715
1456	2.378	1.2924	2.58366
1460	2.305	1.4289	2.55017
1464	2.316	1.626	2.49999
1468	2.337	1.829	2.44973
1472	2.411	2.002	2.39947
1476	2.444	2.194	2.3492
1480	2.526	2.389	2.31046
1484	2.596	2.522	2.31255
1488	2.689	2.65	2.31465
1492	2.795	2.813	2.31674
1496	2.839	2.85	2.31884
1500	2.956	2.932	2.29391
1504	3.067	2.991	2.23527
1508	3.184	3.014	2.17663
1512	3.354	3.062	2.11799
1516	3.612	3.301	2.05935
1520	4.029	3.584	2.01194
1524	4.654	4.015	1.97005
1528	5.524	4.673	1.92817
1532	6.664	5.338	1.88628
1536	6.792	6.792	1.8444
1540	5.873	5.873	1.84187
1544	5.118	5.118	1.84397
1548	4.602	3.281	1.84606
1552	3.902	2.945	1.84815
1556	3.213	2.65	1.85025
1560	2.60403	2.392	1.85234
1564	2.51498	2.105	1.85443
1568	2.42593	1.809	1.85653
1572	2.33688	1.4965	1.85862
1576	2.26231	1.2324	1.86
1580	2.19	1.0435	1.86
1584	2.11769	0.9085	1.86
1588	2.06847	0.7944	1.86
1592	2.01938	0.6858	1.86
1596	1.9703	0.6529	1.86118
1600	1.92121	0.58663	1.86328

## Sheet: Fig. 2
BEDF emission versus 980 nm pumping																				3.3 mW				5.4 mW				8.6 mW				10.8 mW				21.7 mW				34.3 mW				47. 3 mW				61. 0 mW
Wavelength (nm)	1.5 mW	3.3 mW	5.4 mW	8.6 mW	10.8 mW	21.7 mW	34.3 mW	47. 3 mW	61. 0 mW	73.8 mW	88.3 mW	103.8 mW			Wavelength (nm)	1.5 mW	BAC-Al	BAC-P	Total fitting	Original	BAC-Al	BAC-P	Total fitting	Original	BAC-Al	BAC-P	Total fitting	Original	BAC-Al	BAC-P	Total fitting	Original	BAC-Al	BAC-P	Total fitting		BAC-Al	BAC-P	Total fitting	Original	BAC-Al	BAC-P	Total fitting	Original	BAC-Al	BAC-P	Total fitting	Original	BAC-Al
900	0.00676	0.00689	0.00852	0.0076	0.01702	0.01051	0.0092	0.00984	0.00763	0.01379	0.01153	0.00847			1000.1	0.24712				0.25154	0.065491	8.40064e-09	0.065491	0.25125	0.073644	9.60281e-06	0.0736536	0.25745	0.0828595	6.12455e-06	0.0828656	0.26224	0.0874684	2.03307e-05	0.0874888	0.28041	0.0963303	2.65862e-05	0.0963569	0.29587	0.0984988	3.12779e-05	0.0985301	0.31791	0.101786	3.75335e-05	0.101823	0.34135	0.0976787
900.7	0.0121	0.00676	0.01066	0.00798	0.01377	0.00908	0.00904	0.00868	0.01052	0.01079	0.01647	0.00676			1000.8	0.24723				0.25486	0.0676665	9.17313e-09	0.0676665	0.25427	0.0761205	1.01238e-05	0.0761306	0.2614	0.08568	6.46822e-06	0.0856865	0.26687	0.0904638	2.13383e-05	0.0904851	0.2836	0.0996885	2.7904e-05	0.0997164	0.29799	0.101973	3.28282e-05	0.102006	0.3193	0.105397	3.93938e-05	0.105436	0.3469	0.101184
901.4	0.01513	0.01378	0.01167	0.00775	0.00676	0.00743	0.00828	0.01267	0.00699	0.0171	0.00832	0.01058			1001.5	0.24883				0.25386	0.0699045	1.00145e-08	0.0699045	0.25609	0.0786694	1.06717e-05	0.0786801	0.26847	0.0885842	6.83032e-06	0.088591	0.27133	0.0935487	2.23936e-05	0.0935711	0.28543	0.103149	2.92839e-05	0.103179	0.30019	0.105555	3.44516e-05	0.10559	0.32569	0.109121	4.1342e-05	0.109162	0.34682	0.104801
902.1	0.01471	0.01453	0.01156	0.01187	0.00968	0.01273	0.01246	0.01083	0.0171	0.01885	0.00815	0.01047			1002.2	0.24854				0.25154	0.0722066	1.09308e-08	0.0722066	0.25739	0.0812924	1.12479e-05	0.0813036	0.26394	0.0915741	7.2118e-06	0.0915813	0.27033	0.0967253	2.34985e-05	0.0967488	0.28648	0.106716	3.07288e-05	0.106746	0.30033	0.109248	3.61515e-05	0.109284	0.32359	0.112961	4.33818e-05	0.113004	0.35188	0.108532
902.8	0.0126	0.00907	0.00951	0.0117	0.0153	0.0107	0.01468	0.01641	0.00977	0.01962	0.00677	0.01119			1002.9	0.24541				0.25044	0.074574	1.19283e-08	0.074574	0.25906	0.0839911	1.18537e-05	0.0840029	0.2662	0.0946517	7.61365e-06	0.0946593	0.27177	0.0999959	2.46553e-05	0.100021	0.29067	0.11039	3.22416e-05	0.110422	0.30577	0.113054	3.79313e-05	0.113092	0.32569	0.11692	4.55175e-05	0.116965	0.35051	0.11238
903.5	0.01154	0.0078	0.01718	0.0215	0.02046	0.01711	0.01057	0.02002	0.01832	0.01196	0.01237	0.02156			1003.6	0.25038				0.25651	0.0770084	1.30141e-08	0.0770084	0.2605	0.0867673	1.24906e-05	0.0867798	0.26656	0.0978192	8.0369e-06	0.0978272	0.27498	0.103363	2.58664e-05	0.103389	0.29614	0.114175	3.38253e-05	0.114208	0.31067	0.116977	3.97944e-05	0.117017	0.33512	0.121	4.77533e-05	0.121048	0.35662	0.116349
904.2	0.01575	0.00903	0.01153	0.01073	0.01117	0.01414	0.01159	0.01035	0.00954	0.01258	0.00873	0.01444			1004.3	0.249				0.25663	0.0795112	1.41958e-08	0.0795112	0.26903	0.0896229	1.31601e-05	0.0896361	0.27561	0.101079	8.48263e-06	0.101087	0.28035	0.106828	2.7134e-05	0.106855	0.3004	0.118073	3.5483e-05	0.118108	0.32263	0.121019	4.17447e-05	0.121061	0.33939	0.125206	5.00936e-05	0.125256	0.36433	0.120441
904.9	0.01143	0.00894	0.00682	0.00987	0.01222	0.00737	0.01036	0.00803	0.00831	0.01234	0.00863	0.01435			1005	0.24946				0.26369	0.0820839	1.54814e-08	0.082084	0.26755	0.0925596	1.38638e-05	0.0925734	0.2758	0.104432	8.95197e-06	0.104441	0.28009	0.110394	2.84608e-05	0.110423	0.30276	0.122087	3.7218e-05	0.122124	0.32166	0.125183	4.37859e-05	0.125227	0.34182	0.12954	5.2543e-05	0.129593	0.36635	0.124659
905.6	0.00678	0.00825	0.01508	0.01343	0.01192	0.00991	0.02049	0.01286	0.00987	0.01168	0.01151	0.00711			1005.7	0.24769				0.2558	0.0847281	1.68798e-08	0.0847282	0.26742	0.0955792	1.46033e-05	0.0955938	0.27842	0.107882	9.44612e-06	0.107891	0.28333	0.114064	2.98493e-05	0.114094	0.30409	0.12622	3.90337e-05	0.126259	0.32077	0.129472	4.5922e-05	0.129518	0.34119	0.134005	5.51064e-05	0.134061	0.36762	0.129008
906.3	0.00787	0.00903	0.00724	0.00728	0.01612	0.00956	0.00722	0.00888	0.00915	0.00855	0.01782	0.0087			1006.4	0.2466				0.25882	0.0874454	1.84007e-08	0.0874454	0.26552	0.0986836	1.53803e-05	0.098699	0.27791	0.11143	9.96631e-06	0.11144	0.28009	0.117839	3.13022e-05	0.11787	0.30549	0.130475	4.09336e-05	0.130516	0.32278	0.13389	4.81572e-05	0.133938	0.34293	0.138605	5.77887e-05	0.138663	0.36813	0.133489
907	0.00991	0.00799	0.00923	0.00678	0.00678	0.01213	0.0085	0.00912	0.00689	0.00857	0.00742	0.01317			1007.1	0.24786				0.25996	0.0902372	2.00544e-08	0.0902372	0.27064	0.101875	1.61967e-05	0.101891	0.28582	0.115079	1.05139e-05	0.11509	0.289	0.121722	3.28223e-05	0.121754	0.31153	0.134855	4.29215e-05	0.134898	0.32878	0.138439	5.04959e-05	0.13849	0.35253	0.143343	6.05951e-05	0.143404	0.37618	0.138107
907.7	0.00678	0.00678	0.01055	0.00678	0.0119	0.01137	0.00895	0.00679	0.00828	0.01155	0.01361	0.00785			1007.8	0.24774				0.25894	0.0931052	2.1852e-08	0.0931052	0.27071	0.105154	1.70543e-05	0.105171	0.2853	0.118831	1.10901e-05	0.118842	0.2904	0.125715	3.44126e-05	0.125749	0.31304	0.139362	4.50012e-05	0.139407	0.33535	0.143123	5.29425e-05	0.143176	0.35727	0.148223	6.3531e-05	0.148286	0.37801	0.142865
908.4	0.01046	0.00679	0.00687	0.012	0.00679	0.01487	0.00679	0.00981	0.01038	0.01574	0.01247	0.01109			1008.5	0.24401				0.2599	0.096051	2.38056e-08	0.096051	0.27277	0.108524	1.79551e-05	0.108542	0.28275	0.122688	1.16965e-05	0.1227	0.29275	0.129821	3.60762e-05	0.129858	0.31543	0.144	4.71766e-05	0.144047	0.33174	0.147945	5.55018e-05	0.148001	0.35703	0.153247	6.66022e-05	0.153313	0.38045	0.147766
909.1	0.01126	0.01519	0.00729	0.01833	0.00823	0.01974	0.01045	0.00838	0.0094	0.01064	0.01189	0.01692			1009.2	0.24227				0.25852	0.0990762	2.59285e-08	0.0990763	0.27064	0.111987	1.89012e-05	0.112006	0.28216	0.126653	1.23345e-05	0.126665	0.2888	0.134043	3.78162e-05	0.134081	0.31456	0.148772	4.94519e-05	0.148821	0.33435	0.152908	5.81787e-05	0.152966	0.35736	0.158419	6.98144e-05	0.158489	0.38539	0.152814
909.8	0.01105	0.01112	0.01081	0.02116	0.01011	0.01263	0.01995	0.01534	0.01206	0.00924	0.01553	0.00847			1009.9	0.24055				0.26038	0.102183	2.82346e-08	0.102183	0.27227	0.115544	1.98947e-05	0.115564	0.28582	0.130728	1.30058e-05	0.130741	0.29451	0.138383	3.96358e-05	0.138423	0.31886	0.15368	5.18315e-05	0.153732	0.33939	0.158016	6.09782e-05	0.158077	0.36484	0.163743	7.31738e-05	0.163817	0.38654	0.158013
910.5	0.01541	0.0192	0.0134	0.01685	0.0148	0.02073	0.01448	0.00919	0.01775	0.01315	0.01137	0.01268			1010.6	0.24468				0.26266	0.105372	3.07393e-08	0.105372	0.27359	0.119197	2.09377e-05	0.119218	0.291	0.134915	1.37118e-05	0.134928	0.29847	0.142844	4.15387e-05	0.142886	0.32621	0.158728	5.43198e-05	0.158783	0.34778	0.163271	6.39056e-05	0.163335	0.36821	0.169223	7.66868e-05	0.1693	0.39455	0.163365
911.2	0.01665	0.01012	0.00859	0.02331	0.01218	0.01931	0.01651	0.01471	0.02508	0.02407	0.02128	0.01004			1011.3	0.24216				0.26971	0.108645	3.3459e-08	0.108645	0.28255	0.122949	2.20328e-05	0.122971	0.29512	0.139217	1.44544e-05	0.139231	0.3036	0.147428	4.35282e-05	0.147471	0.32961	0.16392	5.69216e-05	0.163977	0.34986	0.168678	6.69665e-05	0.168745	0.37497	0.174862	8.03598e-05	0.174942	0.39967	0.168876
911.9	0.01624	0.00848	0.01114	0.01319	0.0215	0.01833	0.01347	0.01195	0.00967	0.01395	0.0172	0.01374			1012	0.24021				0.26613	0.112005	3.64117e-08	0.112005	0.28145	0.126801	2.31823e-05	0.126825	0.29594	0.143636	1.52354e-05	0.143651	0.30825	0.152138	4.56083e-05	0.152183	0.33327	0.169257	5.96416e-05	0.169317	0.35278	0.17424	7.01666e-05	0.17431	0.37949	0.180663	8.41999e-05	0.180747	0.39939	0.174548
912.6	0.01312	0.01008	0.01356	0.01794	0.01089	0.01658	0.0156	0.01255	0.00965	0.01294	0.01202	0.01209			1012.7	0.24194				0.2654	0.115452	3.96165e-08	0.115452	0.27925	0.130756	2.43887e-05	0.130781	0.29662	0.148174	1.60565e-05	0.14819	0.30514	0.156976	4.77827e-05	0.157024	0.33037	0.174744	6.2485e-05	0.174807	0.35604	0.17996	7.35118e-05	0.180033	0.38045	0.186631	8.82141e-05	0.186719	0.40402	0.180386
913.3	0.01671	0.00897	0.00933	0.01334	0.01546	0.01509	0.01468	0.00841	0.01442	0.01223	0.01011	0.01842			1013.4	0.23961				0.26595	0.118989	4.30942e-08	0.118989	0.27919	0.134816	2.56547e-05	0.134841	0.29992	0.152835	1.69199e-05	0.152852	0.30437	0.161946	5.00554e-05	0.161996	0.33381	0.180384	6.5457e-05	0.18045	0.35909	0.185842	7.70083e-05	0.185919	0.38353	0.192769	9.24099e-05	0.192862	0.40607	0.186393
914	0.01472	0.00677	0.0086	0.00783	0.01026	0.00862	0.01314	0.01332	0.01519	0.00847	0.00677	0.01657			1014.1	0.23725				0.26632	0.122617	4.68672e-08	0.122617	0.28203	0.138982	2.69832e-05	0.139009	0.2995	0.157621	1.78274e-05	0.157638	0.31139	0.16705	5.24307e-05	0.167103	0.33791	0.18618	6.85632e-05	0.186249	0.3635	0.191889	8.06625e-05	0.19197	0.39039	0.199082	9.67951e-05	0.199179	0.41381	0.192573
914.7	0.00677	0.00937	0.01415	0.01278	0.00686	0.01233	0.00814	0.00808	0.0071	0.00867	0.01025	0.01888			1014.8	0.2379				0.26841	0.126339	5.09597e-08	0.126339	0.28275	0.143257	2.83769e-05	0.143285	0.30528	0.162533	1.87813e-05	0.162552	0.31572	0.172291	5.49128e-05	0.172346	0.34642	0.192136	7.18091e-05	0.192207	0.36898	0.198106	8.44813e-05	0.198191	0.39546	0.205573	0.000101378	0.205674	0.41725	0.19893
915.4	0.01107	0.00676	0.01031	0.00785	0.00961	0.00726	0.00676	0.00689	0.01025	0.01226	0.00676	0.01348			1015.5	0.23779				0.27152	0.130155	5.53978e-08	0.130155	0.28655	0.147643	2.98389e-05	0.147672	0.30577	0.167576	1.97838e-05	0.167596	0.31572	0.177672	5.75064e-05	0.177729	0.35091	0.198254	7.52007e-05	0.198329	0.37627	0.204496	8.84714e-05	0.204585	0.40013	0.212245	0.000106166	0.212351	0.42413	0.205469
916.1	0.01359	0.0081	0.00831	0.00694	0.00702	0.00799	0.01528	0.00801	0.01085	0.00737	0.00832	0.01024			1016.2	0.23851				0.27096	0.134068	6.02096e-08	0.134068	0.2896	0.152142	3.13724e-05	0.152173	0.31003	0.172751	2.08372e-05	0.172772	0.32077	0.183195	6.02161e-05	0.183255	0.35392	0.204539	7.87441e-05	0.204618	0.37783	0.211063	9.26401e-05	0.211155	0.403	0.219104	0.000111168	0.219215	0.42904	0.212193
916.8	0.00675	0.00675	0.00851	0.00845	0.00675	0.01176	0.01854	0.01322	0.00952	0.01301	0.00678	0.01474			1016.9	0.23578				0.27315	0.138079	6.54255e-08	0.138079	0.29221	0.156756	3.29806e-05	0.156789	0.31391	0.178061	2.19441e-05	0.178083	0.32449	0.188863	6.30468e-05	0.188927	0.36033	0.210994	8.24458e-05	0.211076	0.38433	0.21781	9.69951e-05	0.217907	0.41467	0.226153	0.000116394	0.22627	0.43924	0.219107
917.5	0.01192	0.00675	0.00984	0.01181	0.01317	0.00798	0.02054	0.00801	0.01694	0.00675	0.01015	0.0124			1017.6	0.23686				0.27158	0.142191	7.1078e-08	0.142191	0.29594	0.161488	3.46669e-05	0.161522	0.31776	0.183509	2.31068e-05	0.183532	0.33052	0.19468	6.60036e-05	0.194746	0.36627	0.217622	8.63124e-05	0.217708	0.3903	0.224741	0.000101544	0.224843	0.41629	0.233397	0.000121853	0.233519	0.44218	0.226214
918.2	0.01444	0.00821	0.00674	0.01413	0.00674	0.0107	0.0129	0.00674	0.01382	0.01044	0.0109	0.01165			1018.3	0.23507				0.27397	0.146404	7.72025e-08	0.146405	0.29635	0.166339	3.6435e-05	0.166376	0.31601	0.189097	2.43282e-05	0.189121	0.3306	0.200649	6.90917e-05	0.200718	0.36299	0.224427	9.03507e-05	0.224517	0.39355	0.231861	0.000106295	0.231968	0.41918	0.240839	0.000127554	0.240966	0.44484	0.23352
918.9	0.00833	0.0084	0.01953	0.01204	0.01442	0.01136	0.01597	0.01586	0.00988	0.01515	0.01364	0.00756			1019	0.22972				0.27397	0.150722	8.3837e-08	0.150722	0.29404	0.171313	3.82886e-05	0.171351	0.3196	0.194828	2.5611e-05	0.194854	0.33343	0.206771	7.23166e-05	0.206843	0.3694	0.231413	9.45679e-05	0.231507	0.39719	0.239173	0.000111256	0.239285	0.42306	0.248483	0.000133508	0.248617	0.44988	0.241028
919.6	0.01237	0.01403	0.01821	0.02117	0.02061	0.02412	0.01952	0.01491	0.0096	0.01854	0.01291	0.02133			1019.7	0.22967				0.27638	0.155145	9.10221e-08	0.155145	0.29765	0.17641	4.02314e-05	0.176451	0.32412	0.200705	2.6958e-05	0.200732	0.33775	0.213051	7.56841e-05	0.213126	0.3767	0.238583	9.89715e-05	0.238682	0.40207	0.246682	0.000116437	0.246798	0.42875	0.256335	0.000139724	0.256475	0.46004	0.248743
920.3	0.02206	0.01529	0.01365	0.01377	0.0202	0.01877	0.02028	0.01572	0.015	0.01711	0.02091	0.01626			1020.4	0.23318				0.27951	0.159676	9.88021e-08	0.159676	0.30318	0.181634	4.22677e-05	0.181677	0.33174	0.206731	2.83725e-05	0.206759	0.34682	0.219491	7.91999e-05	0.21957	0.38512	0.245941	0.000103569	0.246045	0.41438	0.254391	0.000121846	0.254513	0.43964	0.264398	0.000146215	0.264544	0.46687	0.256669
921	0.01223	0.01057	0.00825	0.02193	0.0156	0.02267	0.02477	0.00898	0.01181	0.01798	0.00955	0.01842			1021.1	0.23372				0.2819	0.164317	1.07224e-07	0.164317	0.30747	0.186987	4.44015e-05	0.187032	0.33535	0.212908	2.98574e-05	0.212938	0.35237	0.226094	8.28703e-05	0.226177	0.39066	0.253491	0.000108369	0.253599	0.41918	0.262304	0.000127493	0.262432	0.44679	0.272677	0.000152991	0.27283	0.47435	0.264811
921.7	0.01669	0.01307	0.01742	0.01833	0.00916	0.01751	0.01977	0.01685	0.01972	0.0216	0.00669	0.0106			1021.8	0.23286				0.28327	0.169068	1.1634e-07	0.169068	0.30953	0.192471	4.66373e-05	0.192518	0.33963	0.219239	3.14162e-05	0.21927	0.35261	0.232863	8.67016e-05	0.23295	0.39719	0.261236	0.000113379	0.26135	0.42599	0.270426	0.000133387	0.27056	0.45352	0.281176	0.000160065	0.281336	0.47918	0.273174
922.4	0.02454	0.0099	0.01473	0.00842	0.01431	0.01133	0.00759	0.01626	0.01673	0.02185	0.01185	0.02592			1022.5	0.23367				0.28642	0.173933	1.26203e-07	0.173933	0.3147	0.198088	4.89796e-05	0.198137	0.3408	0.225727	3.30523e-05	0.22576	0.35992	0.239802	9.07005e-05	0.239892	0.40179	0.269181	0.000118608	0.269299	0.43033	0.278761	0.000139539	0.2789	0.45656	0.289899	0.000167447	0.290067	0.48697	0.281761
923.1	0.0105	0.016	0.02297	0.01092	0.02666	0.01613	0.01138	0.00852	0.01468	0.01529	0.02139	0.01354			1023.2	0.23276				0.289	0.178913	1.36873e-07	0.178914	0.31405	0.203841	5.14332e-05	0.203892	0.34618	0.232375	3.47693e-05	0.232409	0.36216	0.246913	9.48737e-05	0.247008	0.40551	0.277328	0.000124066	0.277452	0.43732	0.287312	0.000145959	0.287458	0.46355	0.298852	0.000175151	0.299027	0.49102	0.290577
923.8	0.00933	0.00669	0.01157	0.01624	0.01768	0.01589	0.00867	0.00988	0.01603	0.01165	0.00662	0.00853			1023.9	0.23292				0.29141	0.184011	1.48414e-07	0.184011	0.32011	0.209731	5.4003e-05	0.209785	0.35051	0.239185	3.6571e-05	0.239221	0.36923	0.2542	9.92284e-05	0.254299	0.41581	0.285683	0.00012976	0.285812	0.44137	0.296085	0.000152659	0.296238	0.47174	0.308038	0.000183191	0.308221	0.49923	0.299628
924.5	0.01057	0.00659	0.01232	0.0117	0.01271	0.01695	0.00702	0.0174	0.01093	0.01552	0.01183	0.01607			1024.6	0.23238				0.29255	0.189227	1.60895e-07	0.189227	0.31989	0.215762	5.66943e-05	0.215819	0.35506	0.24616	3.84613e-05	0.246199	0.37359	0.261665	0.000103772	0.261769	0.41937	0.294248	0.000135702	0.294383	0.44999	0.305083	0.000159649	0.305243	0.47753	0.317463	0.000191579	0.317654	0.50559	0.308918
925.2	0.01223	0.01084	0.00854	0.00801	0.01026	0.01403	0.01135	0.01262	0.01208	0.01353	0.00656	0.01694			1025.3	0.2327				0.29676	0.194563	1.74387e-07	0.194564	0.32681	0.221935	5.95123e-05	0.221995	0.36124	0.253304	4.04443e-05	0.253344	0.37949	0.269312	0.000108512	0.26942	0.42628	0.303027	0.0001419	0.303169	0.4593	0.314311	0.000166942	0.314478	0.48831	0.32713	0.00020033	0.32733	0.51594	0.318452
925.9	0.00929	0.00848	0.01357	0.01582	0.01009	0.00867	0.00876	0.01163	0.0122	0.01269	0.00966	0.00727			1026	0.23469				0.3029	0.200023	1.8897e-07	0.200023	0.33121	0.228254	6.24627e-05	0.228316	0.36703	0.260619	4.25243e-05	0.260661	0.38735	0.277144	0.000113457	0.277257	0.43561	0.312026	0.000148366	0.312174	0.46774	0.323773	0.000174549	0.323948	0.49751	0.337045	0.000209459	0.337254	0.5265	0.328234
926.6	0.0096	0.00793	0.01162	0.01665	0.00942	0.00697	0.01401	0.00935	0.0085	0.01774	0.01003	0.01154			1026.7	0.23572				0.30613	0.205607	2.0473e-07	0.205607	0.33659	0.234719	6.55512e-05	0.234785	0.37446	0.268107	4.47057e-05	0.268152	0.39555	0.285164	0.000118614	0.285283	0.44259	0.321247	0.000155111	0.321402	0.47577	0.333474	0.000182483	0.333656	0.50408	0.347212	0.00021898	0.347431	0.53456	0.33827
927.3	0.00876	0.00649	0.01027	0.01678	0.01158	0.00659	0.01151	0.00763	0.01764	0.01697	0.00649	0.0112			1027.4	0.23448				0.30711	0.211318	2.21757e-07	0.211318	0.34182	0.241334	6.8784e-05	0.241403	0.38089	0.275773	4.69933e-05	0.27582	0.39985	0.293376	0.000123993	0.2935	0.44978	0.330694	0.000162144	0.330856	0.48128	0.343417	0.000190758	0.343608	0.51215	0.357636	0.00022891	0.357865	0.54063	0.348564
928	0.00695	0.01405	0.00801	0.00646	0.01022	0.00881	0.00786	0.00885	0.01058	0.01511	0.01456	0.01766			1028.1	0.23616				0.30996	0.217157	2.40149e-07	0.217157	0.34674	0.248101	7.21673e-05	0.248173	0.38663	0.283618	4.93918e-05	0.283668	0.40738	0.301782	0.000129602	0.301911	0.461	0.340372	0.000169479	0.340542	0.49306	0.353608	0.000199387	0.353807	0.5236	0.368322	0.000239265	0.368561	0.5503	0.359121
928.7	0.00938	0.00644	0.01106	0.01049	0.01042	0.00774	0.01302	0.0146	0.01046	0.00979	0.01013	0.00834			1028.8	0.23659				0.31326	0.223126	2.60011e-07	0.223126	0.35035	0.255023	7.57077e-05	0.255098	0.38922	0.291646	5.19063e-05	0.291698	0.41153	0.310385	0.00013545	0.310521	0.46526	0.350285	0.000177127	0.350462	0.50003	0.364051	0.000208384	0.364259	0.52942	0.379274	0.000250061	0.379524	0.55924	0.369947
929.4	0.00955	0.00895	0.01327	0.00641	0.00724	0.01925	0.01449	0.01913	0.02156	0.01345	0.01824	0.01206			1029.5	0.23681				0.31615	0.229228	2.81455e-07	0.229228	0.35286	0.2621	7.94119e-05	0.26218	0.39455	0.29986	5.45421e-05	0.299914	0.41831	0.31919	0.000141547	0.319332	0.47293	0.360436	0.0001851	0.360621	0.50828	0.374749	0.000217765	0.374967	0.53753	0.390498	0.000261317	0.390759	0.56442	0.381046
930.1	0.01798	0.01126	0.00696	0.01243	0.01983	0.01011	0.01419	0.00864	0.00759	0.0108	0.00706	0.0137			1030.2	0.23405				0.31747	0.235464	3.04604e-07	0.235464	0.35408	0.269337	8.32871e-05	0.269421	0.39967	0.308261	5.73047e-05	0.308319	0.42121	0.328199	0.000147903	0.328347	0.47764	0.37083	0.000193411	0.371023	0.51369	0.385709	0.000227543	0.385937	0.54175	0.401998	0.000273051	0.402271	0.56728	0.392423
930.8	0.0073	0.01407	0.01388	0.01775	0.01777	0.01448	0.01195	0.01435	0.01384	0.01332	0.01338	0.02054			1030.9	0.23475				0.31871	0.241835	3.29586e-07	0.241836	0.35818	0.276736	8.73406e-05	0.276823	0.40188	0.316855	6.01997e-05	0.316915	0.42179	0.337415	0.000154528	0.337569	0.48295	0.38147	0.000202075	0.381672	0.51618	0.396934	0.000237735	0.397172	0.54714	0.413779	0.000285282	0.414065	0.57557	0.404084
931.5	0.01704	0.01126	0.01387	0.01151	0.02222	0.01543	0.01033	0.01372	0.01736	0.01212	0.00843	0.01514			1031.6	0.23367				0.31908	0.248345	3.56542e-07	0.248345	0.36141	0.284298	9.15802e-05	0.284389	0.40504	0.325642	6.32332e-05	0.325706	0.42964	0.346842	0.000161432	0.347003	0.48978	0.392361	0.000211104	0.392572	0.52336	0.408429	0.000248357	0.408677	0.55233	0.425847	0.000298029	0.426145	0.58318	0.416034
932.2	0.01945	0.01139	0.02673	0.02188	0.01977	0.01768	0.01902	0.0181	0.01575	0.01719	0.01546	0.0149			1032.3	0.23265				0.32412	0.254994	3.8562e-07	0.254995	0.36593	0.292026	9.60136e-05	0.292122	0.41115	0.334627	6.64114e-05	0.334694	0.43682	0.356482	0.000168627	0.356651	0.49671	0.403507	0.000220513	0.403728	0.53248	0.420198	0.000259427	0.420458	0.56208	0.438205	0.000311312	0.438516	0.58952	0.428278
932.9	0.0124	0.02082	0.0131	0.0158	0.01807	0.01537	0.01926	0.01977	0.01535	0.01515	0.02054	0.01632			1033	0.23464				0.32976	0.261786	4.16981e-07	0.261786	0.37085	0.299922	0.000100649	0.300023	0.41899	0.343812	6.97407e-05	0.343882	0.44504	0.366339	0.000176125	0.366516	0.50699	0.414912	0.000230317	0.415143	0.54425	0.432247	0.000270961	0.432518	0.57438	0.450859	0.000325153	0.451184	0.5991	0.44082
933.6	0.01421	0.01761	0.02574	0.01632	0.0211	0.02022	0.02428	0.01937	0.02412	0.01704	0.01912	0.01815			1033.7	0.23917				0.33589	0.26872	4.50796e-07	0.268721	0.37792	0.307989	0.000105496	0.308095	0.42737	0.3532	7.32279e-05	0.353273	0.45415	0.376417	0.000183936	0.376601	0.51964	0.42658	0.000240531	0.426821	0.55642	0.444579	0.000282978	0.444862	0.58425	0.463814	0.000339574	0.464154	0.61249	0.453667
934.3	0.01256	0.01798	0.01827	0.02161	0.01814	0.02373	0.01935	0.01885	0.02856	0.01442	0.02467	0.01913			1034.4	0.23961				0.3383	0.2758	4.87251e-07	0.275801	0.3838	0.316229	0.000110562	0.31634	0.43521	0.362794	7.68799e-05	0.362871	0.46398	0.386718	0.000192073	0.386911	0.52991	0.438515	0.000251172	0.438767	0.56741	0.457199	0.000295497	0.457494	0.59951	0.477075	0.000354596	0.47743	0.6246	0.466823
935	0.01854	0.01731	0.00873	0.01637	0.01151	0.01872	0.01728	0.01793	0.01749	0.01944	0.0139	0.02052			1035.1	0.24049				0.34364	0.283027	5.26541e-07	0.283028	0.3912	0.324645	0.000115857	0.324761	0.44218	0.372596	8.07041e-05	0.372677	0.47435	0.397246	0.000200549	0.397447	0.53988	0.450722	0.000262256	0.450984	0.5777	0.470112	0.000308536	0.470421	0.61038	0.490647	0.000370244	0.491018	0.63694	0.480294
935.7	0.02013	0.018	0.02538	0.0211	0.02482	0.02879	0.0317	0.01998	0.02359	0.01675	0.02058	0.02179			1035.8	0.24581				0.3493	0.290403	5.68878e-07	0.290404	0.40004	0.333238	0.000121391	0.333359	0.45415	0.382611	8.47081e-05	0.382695	0.48306	0.408004	0.000209376	0.408214	0.55246	0.463204	0.0002738	0.463478	0.59156	0.483323	0.000322118	0.483645	0.62273	0.504535	0.000386541	0.504922	0.65238	0.494086
936.4	0.02196	0.0153	0.01903	0.01731	0.01559	0.02218	0.02394	0.02391	0.02094	0.02436	0.01254	0.01435			1036.5	0.24615				0.35555	0.29793	6.14488e-07	0.297931	0.40588	0.342011	0.000127173	0.342138	0.46238	0.392839	8.88997e-05	0.392928	0.49193	0.418995	0.000218569	0.419214	0.56351	0.475965	0.000285822	0.476251	0.60395	0.496836	0.000336261	0.497172	0.63694	0.518744	0.000403513	0.519148	0.66328	0.508202
937.1	0.02413	0.01622	0.01243	0.01948	0.02354	0.01735	0.0188	0.01409	0.01773	0.02434	0.01355	0.02529			1037.2	0.24564				0.36025	0.30561	6.63615e-07	0.30561	0.41181	0.350966	0.000133214	0.351099	0.47076	0.403286	9.32872e-05	0.403379	0.49946	0.430222	0.000228142	0.43045	0.57557	0.48901	0.00029834	0.489308	0.61631	0.510655	0.000350988	0.511006	0.64521	0.533279	0.000421185	0.533701	0.67515	0.522649
937.8	0.02829	0.01165	0.01675	0.02773	0.01706	0.02301	0.02018	0.02927	0.01852	0.01607	0.0143	0.013			1037.9	0.24723				0.36517	0.313444	7.16516e-07	0.313444	0.41773	0.360106	0.000139525	0.360245	0.47599	0.413952	9.78792e-05	0.41405	0.50699	0.441689	0.000238109	0.441927	0.58479	0.502343	0.000311373	0.502654	0.62532	0.524787	0.000366321	0.525153	0.65857	0.548145	0.000439585	0.548585	0.6836	0.537432
938.5	0.02913	0.02015	0.01737	0.01972	0.02522	0.02299	0.02512	0.02032	0.02497	0.02319	0.02343	0.01107			1038.6	0.24808				0.36779	0.321434	7.73471e-07	0.321434	0.42131	0.369432	0.000146117	0.369578	0.48206	0.424841	0.000102685	0.424944	0.51357	0.453398	0.000248484	0.453646	0.59115	0.515967	0.000324941	0.516292	0.63445	0.539234	0.000382283	0.539616	0.66604	0.563348	0.00045874	0.563806	0.69215	0.552557
939.2	0.0265	0.01788	0.0244	0.01731	0.0168	0.01905	0.02645	0.01826	0.02115	0.02017	0.02239	0.01211			1039.3	0.24751				0.37094	0.329582	8.34775e-07	0.329582	0.42737	0.378947	0.000153002	0.3791	0.48967	0.435957	0.000107713	0.436064	0.52216	0.465353	0.000259284	0.465612	0.59965	0.529887	0.000339064	0.530226	0.64417	0.554002	0.000398899	0.554401	0.67608	0.578891	0.000478679	0.57937	0.70162	0.568028
939.9	0.02252	0.02259	0.02224	0.02795	0.03546	0.01155	0.0171	0.01911	0.02053	0.02547	0.0235	0.02073			1040	0.24866				0.37497	0.337889	9.00746e-07	0.33789	0.43431	0.388653	0.000160191	0.388813	0.499	0.447301	0.000112973	0.447414	0.53125	0.477556	0.000270525	0.477827	0.61193	0.544107	0.000353764	0.544461	0.6569	0.569095	0.000416193	0.569511	0.68612	0.59478	0.000499432	0.59528	0.71499	0.583851
940.6	0.02706	0.02477	0.01578	0.02816	0.01239	0.01666	0.01709	0.01206	0.01551	0.01523	0.01364	0.01807			1040.7	0.25217				0.3838	0.346358	9.71724e-07	0.346359	0.44381	0.398552	0.000167697	0.39872	0.50781	0.458876	0.000118475	0.458994	0.54363	0.490012	0.000282224	0.490294	0.62517	0.558631	0.000369062	0.559	0.67035	0.584518	0.000434191	0.584952	0.70162	0.611021	0.000521029	0.611542	0.72929	0.600032
941.3	0.02548	0.02603	0.02063	0.0248	0.02611	0.01978	0.02396	0.01923	0.01983	0.01895	0.02296	0.02368			1041.4	0.25704				0.38994	0.354989	1.04807e-06	0.35499	0.45092	0.408647	0.000175534	0.408822	0.51808	0.470685	0.00012423	0.47081	0.55437	0.502722	0.000294397	0.503017	0.63782	0.573463	0.000384981	0.573848	0.68344	0.600276	0.000452919	0.600729	0.71532	0.627618	0.000543502	0.628161	0.74148	0.616575
942	0.02755	0.01605	0.01764	0.02109	0.02021	0.02108	0.02687	0.01945	0.01825	0.02157	0.02956	0.02123			1042.1	0.25674				0.39637	0.363786	1.13018e-06	0.363787	0.45878	0.418939	0.000183714	0.419123	0.52966	0.482732	0.000130249	0.482862	0.56455	0.515691	0.000307063	0.515998	0.65238	0.588608	0.000401544	0.589009	0.69839	0.616373	0.000472404	0.616845	0.73164	0.644576	0.000566885	0.645143	0.75596	0.633486
942.7	0.02309	0.02202	0.0182	0.02591	0.02608	0.0245	0.02074	0.02274	0.02376	0.01721	0.01914	0.01349			1042.8	0.2617				0.40309	0.372748	1.21846e-06	0.372749	0.46957	0.429431	0.000192251	0.429623	0.53963	0.495017	0.000136542	0.495154	0.57717	0.528921	0.000320239	0.529241	0.66619	0.604067	0.000418774	0.604486	0.71417	0.632813	0.000492676	0.633306	0.74662	0.6619	0.000591211	0.662491	0.77073	0.650771
943.4	0.03703	0.02905	0.0211	0.03013	0.0337	0.03219	0.01941	0.02328	0.01688	0.02389	0.01514	0.02743			1043.5	0.26626				0.41191	0.381878	1.31335e-06	0.381879	0.47929	0.440124	0.00020116	0.440325	0.5522	0.507545	0.000143122	0.507688	0.59115	0.542414	0.000333946	0.542748	0.68234	0.619847	0.000436699	0.620284	0.73164	0.649602	0.000513763	0.650116	0.76718	0.679595	0.000616516	0.680212	0.78977	0.668434
944.1	0.03724	0.02865	0.03595	0.03372	0.03005	0.02668	0.02961	0.02645	0.02745	0.02326	0.0188	0.02367			1044.2	0.26835				0.42238	0.391177	1.41534e-06	0.391178	0.48899	0.45102	0.000210456	0.451231	0.56416	0.520318	0.000150001	0.520468	0.60506	0.556175	0.000348202	0.556523	0.70081	0.635951	0.000455342	0.636406	0.7492	0.666744	0.000535696	0.667279	0.78307	0.697667	0.000642835	0.69831	0.80928	0.686481
944.8	0.0331	0.0291	0.03294	0.03647	0.0377	0.0376	0.03616	0.029	0.02313	0.02762	0.0245	0.01885			1044.9	0.27233				0.42806	0.400647	1.52492e-06	0.400648	0.49831	0.462123	0.000220155	0.462343	0.5769	0.533338	0.00015719	0.533495	0.61759	0.570205	0.000363029	0.570568	0.71351	0.652382	0.00047473	0.652857	0.76401	0.684242	0.000558506	0.684801	0.79965	0.716119	0.000670207	0.71679	0.82395	0.704918
945.5	0.03542	0.03822	0.03392	0.03301	0.02304	0.03153	0.02658	0.03378	0.02346	0.03196	0.02533	0.02837			1045.6	0.27669				0.43631	0.410289	1.64263e-06	0.410291	0.50839	0.473432	0.000230272	0.473663	0.58966	0.546607	0.000164704	0.546772	0.63139	0.584508	0.000378447	0.584886	0.73047	0.669145	0.000494892	0.66964	0.78055	0.702103	0.000582226	0.702685	0.81546	0.734958	0.000698671	0.735656	0.84217	0.723749
946.2	0.04085	0.0414	0.04041	0.03792	0.02699	0.03786	0.03354	0.02259	0.03244	0.02325	0.02818	0.02854			1046.3	0.27701				0.443	0.420105	1.76906e-06	0.420107	0.5188	0.484951	0.000240824	0.485192	0.60104	0.560129	0.000172555	0.560302	0.64328	0.599086	0.000394478	0.599481	0.74422	0.686243	0.000515855	0.686759	0.79781	0.720329	0.000606889	0.720936	0.83503	0.754187	0.000728266	0.754915	0.85961	0.74298
946.9	0.05498	0.04569	0.03326	0.04496	0.0488	0.04328	0.03311	0.03318	0.02845	0.04153	0.02919	0.02921			1047	0.28373				0.45562	0.430096	1.90481e-06	0.430098	0.52942	0.496682	0.000251829	0.496933	0.61532	0.573906	0.000180759	0.574086	0.65978	0.613943	0.000411144	0.614354	0.76401	0.703681	0.00053765	0.704218	0.81733	0.738926	0.000632529	0.739558	0.85526	0.773811	0.000759035	0.77457	0.88044	0.762615
947.6	0.06516	0.0474	0.04725	0.0435	0.04838	0.04575	0.03918	0.04763	0.03408	0.03011	0.03043	0.02255			1047.7	0.28675				0.46398	0.440263	2.05054e-06	0.440265	0.5425	0.508625	0.000263304	0.508888	0.62777	0.587939	0.000189329	0.588129	0.67453	0.629081	0.000428469	0.629509	0.78289	0.721461	0.000560305	0.722021	0.83676	0.757897	0.000659183	0.758556	0.87357	0.793836	0.000791019	0.794627	0.90012	0.782661
948.3	0.06104	0.05236	0.05283	0.06242	0.05834	0.05252	0.0541	0.04344	0.03567	0.03559	0.0294	0.0278			1048.4	0.2902				0.47337	0.450608	2.20695e-06	0.45061	0.5531	0.520783	0.000275268	0.521058	0.64284	0.602233	0.000198281	0.602431	0.68913	0.644502	0.000446477	0.644949	0.79965	0.739587	0.000583854	0.740171	0.85704	0.777248	0.000686887	0.777935	0.89372	0.814266	0.000824264	0.81509	0.9196	0.803122
949	0.07714	0.07681	0.06311	0.06467	0.06918	0.06259	0.06192	0.05652	0.04531	0.03939	0.03412	0.02493			1049.1	0.29628				0.48062	0.461132	2.37479e-06	0.461134	0.56351	0.533158	0.00028774	0.533445	0.65645	0.616788	0.000207631	0.616995	0.70307	0.66021	0.000465192	0.660675	0.81583	0.758063	0.000608328	0.758672	0.87478	0.796981	0.00071568	0.797697	0.91285	0.835105	0.000858816	0.835964	0.94037	0.824004
949.7	0.08638	0.07231	0.07759	0.07584	0.07253	0.06308	0.06397	0.05988	0.04744	0.05712	0.03515	0.03471			1049.8	0.30019				0.48967	0.471836	2.55485e-06	0.471839	0.5761	0.54575	0.00030074	0.546051	0.67127	0.631606	0.000217395	0.631824	0.72061	0.676206	0.00048464	0.676691	0.83599	0.776893	0.00063376	0.777527	0.89516	0.817103	0.0007456	0.817848	0.93433	0.856359	0.00089472	0.857254	0.95852	0.845311
950.4	0.09579	0.09612	0.09266	0.08762	0.0858	0.07686	0.06941	0.06397	0.05974	0.0524	0.05206	0.03893			1050.5	0.30528				0.50084	0.482722	2.74798e-06	0.482724	0.58817	0.558563	0.000314288	0.558877	0.68549	0.646691	0.00022759	0.646919	0.73722	0.692494	0.000504848	0.692999	0.85585	0.796081	0.000660186	0.796741	0.91601	0.837615	0.00077669	0.838392	0.95543	0.878032	0.000932027	0.878964	0.9813	0.867048
951.1	0.11008	0.10088	0.10072	0.08841	0.09404	0.09007	0.08686	0.07746	0.0752	0.06399	0.04867	0.03828			1051.2	0.30939				0.51086	0.49379	2.95507e-06	0.493793	0.60021	0.571597	0.000328406	0.571925	0.70129	0.662045	0.000238233	0.662283	0.75318	0.709075	0.000525843	0.709601	0.87297	0.815628	0.000687641	0.816316	0.93691	0.858524	0.000808989	0.859333	0.97589	0.900128	0.000970787	0.901098	1.00346	0.889221
951.8	0.129	0.11617	0.11566	0.12709	0.12092	0.1113	0.09995	0.08295	0.07797	0.07386	0.06921	0.05076			1051.9	0.31536				0.5242	0.505041	3.1771e-06	0.505044	0.61489	0.584854	0.000343116	0.585197	0.71912	0.677668	0.000249344	0.677917	0.77108	0.725953	0.000547653	0.7265	0.89681	0.83554	0.000716162	0.836256	0.96051	0.879832	0.000842543	0.880674	1.00115	0.922651	0.00101105	0.923662	1.02707	0.911834
952.5	0.15283	0.13434	0.13832	0.14548	0.13938	0.12738	0.10839	0.10366	0.09309	0.08712	0.05998	0.06125			1052.6	0.32285				0.53641	0.516477	3.41508e-06	0.516481	0.63081	0.598335	0.000358441	0.598693	0.73621	0.693564	0.00026094	0.693825	0.79013	0.743129	0.000570307	0.743699	0.92045	0.855818	0.000745786	0.856564	0.98537	0.901543	0.000877396	0.902421	1.02707	0.945607	0.00105287	0.94666	1.05366	0.934892
953.2	0.17976	0.15787	0.16368	0.16546	0.17053	0.16021	0.13459	0.1197	0.09601	0.0935	0.07651	0.06084			1053.3	0.32772				0.54601	0.528099	3.67011e-06	0.528103	0.64298	0.612041	0.000374404	0.612416	0.75284	0.709734	0.000273042	0.710007	0.80854	0.760605	0.000593835	0.761199	0.94081	0.876467	0.000776554	0.877243	1.00856	0.923662	0.000913593	0.924576	1.05269	0.969	0.00109631	0.970096	1.0787	0.958399
953.9	0.20091	0.18459	0.20059	0.18668	0.18932	0.18884	0.15867	0.13186	0.12283	0.10588	0.08511	0.06702			1054	0.33366				0.55667	0.539907	3.94335e-06	0.539911	0.65811	0.625975	0.00039103	0.626366	0.7686	0.72618	0.00028567	0.726466	0.82832	0.778385	0.000618269	0.779003	0.96294	0.897489	0.000808505	0.898298	1.03039	0.946192	0.000951183	0.947143	1.07572	0.992833	0.00114142	0.993974	1.10281	0.982362
954.6	0.2209	0.22662	0.23297	0.24244	0.24615	0.239	0.2064	0.16873	0.13308	0.12627	0.10044	0.0677			1054.7	0.33931				0.56781	0.551903	4.23602e-06	0.551907	0.67019	0.640137	0.000408344	0.640545	0.78578	0.742904	0.000298845	0.743203	0.8445	0.796469	0.000643639	0.797113	0.98424	0.918888	0.000841682	0.919729	1.05293	0.969137	0.000990214	0.970127	1.10027	1.01711	0.00118826	1.0183	1.12538	1.00678
955.3	0.28379	0.26583	0.31827	0.32509	0.31827	0.30832	0.25078	0.20147	0.15385	0.14362	0.11387	0.08072			1055.4	0.34602				0.5821	0.564086	4.54946e-06	0.564091	0.68596	0.654528	0.000426371	0.654954	0.80427	0.759907	0.000312589	0.76022	0.86477	0.81486	0.00066998	0.81553	1.00577	0.940666	0.000876128	0.941542	1.07895	0.9925	0.00103074	0.993531	1.12564	1.04184	0.00123689	1.04307	1.15372	1.03167
956	0.33029	0.33775	0.40235	0.40523	0.38654	0.37775	0.30458	0.23961	0.18093	0.16342	0.12806	0.08851			1056.1	0.3531				0.5932	0.576458	4.88504e-06	0.576463	0.70291	0.66915	0.000445139	0.669595	0.82054	0.777192	0.000326925	0.777518	0.88308	0.83356	0.000697325	0.834257	1.03062	0.962826	0.000911886	0.963738	1.10382	1.01629	0.00107281	1.01736	1.1508	1.06702	0.00128737	1.0683	1.17788	1.05702
956.7	0.3801	0.39165	0.47261	0.49797	0.461	0.47742	0.38735	0.29087	0.22029	0.19085	0.14976	0.10261			1056.8	0.35925				0.6059	0.58902	5.24426e-06	0.589025	0.71581	0.684003	0.000464677	0.684467	0.84004	0.794759	0.000341876	0.795101	0.90303	0.852571	0.000725708	0.853296	1.05342	0.985372	0.000949003	0.986321	1.12798	1.0405	0.00111647	1.04161	1.17571	1.09265	0.00133977	1.09399	1.2042	1.08285
957.4	0.44188	0.45144	0.55706	0.60716	0.54979	0.59635	0.5163	0.38824	0.2626	0.2367	0.17689	0.10275			1057.5	0.3645				0.61631	0.601772	5.6287e-06	0.601778	0.7303	0.699089	0.000485011	0.699574	0.85763	0.81261	0.000357467	0.812967	0.92257	0.871893	0.000755167	0.872649	1.07647	1.00831	0.000987527	1.00929	1.15319	1.06513	0.0011618	1.0663	1.20226	1.11875	0.00139416	1.12014	1.23084	1.10915
958.1	0.58506	0.76842	1.17058	1.44411	1.11686	1.06782	0.89125	0.55706	0.3193	0.27925	0.2045	0.11998			1058.2	0.37145				0.63009	0.614714	6.04004e-06	0.61472	0.74662	0.714408	0.000506173	0.714914	0.87478	0.830747	0.000373723	0.83112	0.94319	0.89153	0.000785739	0.892316	1.09901	1.03163	0.0010275	1.03266	1.17733	1.09021	0.00120883	1.09141	1.228	1.14531	0.0014506	1.14676	1.25806	1.13593
958.8	1.98016	1.2067	4.93287	2.71519	1.51391	1.46757	1.13344	0.68423	0.37914	0.32779	0.25663	0.13906			1058.9	0.37914				0.64106	0.627848	6.48006e-06	0.627854	0.7619	0.729961	0.000528194	0.730489	0.89228	0.84917	0.000390669	0.849561	0.96028	0.911483	0.000817462	0.9123	1.12279	1.05535	0.00106899	1.05641	1.20282	1.11571	0.00125763	1.11697	1.25372	1.17234	0.00150916	1.17385	1.28499	1.1632
959.5	2.09508	1.33321	5.14754	2.90402	1.65272	1.65082	1.32831	0.83503	0.45909	0.383	0.2892	0.16327			1059.6	0.383				0.65449	0.641173	6.95065e-06	0.64118	0.77553	0.745749	0.000551104	0.746301	0.90949	0.867881	0.000408334	0.86829	0.97904	0.931752	0.000850375	0.932602	1.1434	1.07946	0.00111203	1.08057	1.22574	1.14166	0.00130827	1.14296	1.27791	1.19984	0.00156992	1.20141	1.31009	1.19096
960.2	2.17921	1.43946	5.2723	3.11028	1.80136	1.88365	1.7402	1.1102	0.6368	0.48406	0.37334	0.19436			1060.3	0.38985				0.66328	0.65469	7.45384e-06	0.654697	0.78922	0.761773	0.000574937	0.762348	0.92534	0.886882	0.000426745	0.887308	0.99839	0.95234	0.00088452	0.953224	1.16627	1.10397	0.00115668	1.10512	1.24997	1.16804	0.0013608	1.1694	1.30227	1.22781	0.00163296	1.22944	1.33229	1.21921
960.9	2.3142	1.54348	6.85962	3.45144	1.98518	2.73338	9.05524	3.34349	1.1825	0.78397	0.44648	0.21903			1061	0.396				0.67717	0.668399	7.99175e-06	0.668407	0.8039	0.778033	0.000599727	0.778633	0.94602	0.906172	0.000445931	0.906618	1.01812	0.973247	0.000919938	0.974167	1.19179	1.12887	0.001203	1.13008	1.27644	1.19487	0.00141529	1.19628	1.33199	1.25626	0.00169835	1.25796	1.36239	1.24796
961.6	9.50605	37.8007	10.3015	31.6446	98.2426	113.815	49.5564	5.22637	1.5181	0.84762	0.5479	0.26014			1061.7	0.40542				0.69454	0.6823	8.56667e-06	0.682308	0.82433	0.79453	0.000625508	0.795155	0.96895	0.925753	0.000465921	0.926219	1.044	0.994475	0.000956673	0.995432	1.22039	1.15418	0.00125103	1.15543	1.30798	1.22214	0.00147181	1.22362	1.36301	1.28519	0.00176617	1.28696	1.39605	1.27721
962.3	15.0973	38.4946	53.0396	80.5564	106.365	116.038	49.7508	5.58985	1.71554	1.04328	0.73739	0.31297			1062.4	0.414				0.70974	0.696393	9.18098e-06	0.696402	0.84256	0.811264	0.000652317	0.811916	0.99152	0.945626	0.000486748	0.946113	1.06832	1.01603	0.00099477	1.01702	1.2494	1.1799	0.00130085	1.1812	1.34029	1.24987	0.00153042	1.2514	1.39701	1.31461	0.0018365	1.31644	1.43087	1.30696
963	15.0695	38.1768	52.6502	79.7627	105.779	115.878	49.9804	6.01866	2.09459	1.59625	1.02802	0.38654			1063.1	0.42141				0.72427	0.710678	9.83726e-06	0.710688	0.86238	0.828235	0.000680191	0.828915	1.01461	0.965791	0.000508443	0.9663	1.09396	1.0379	0.00103427	1.03893	1.27997	1.20602	0.00135251	1.20737	1.37341	1.27804	0.00159119	1.27963	1.42988	1.34451	0.00190943	1.34642	1.4642	1.33722
963.7	14.8594	37.4973	52.1675	78.7952	104.785	114.948	49.7852	17.8197	34.34	12.6415	1.56135	0.47119			1063.8	0.42737				0.73875	0.725156	1.05382e-05	0.725167	0.87801	0.845443	0.000709168	0.846152	1.03514	0.986249	0.00053104	0.98678	1.11609	1.06009	0.00107523	1.06117	1.30677	1.23254	0.00140607	1.23395	1.40023	1.30667	0.0016542	1.30833	1.45881	1.3749	0.00198505	1.37688	1.49451	1.36798
964.4	14.6927	37.051	51.4399	78.343	102.707	116.172	67.4994	125.199	103.514	16.4816	1.78443	0.5545			1064.5	0.43381				0.75093	0.739826	1.12867e-05	0.739837	0.89146	0.862889	0.000739289	0.863628	1.05342	1.007	0.000554572	1.00756	1.13397	1.08261	0.0011177	1.08373	1.3277	1.25947	0.0014616	1.26094	1.42233	1.33576	0.00171953	1.33748	1.48286	1.40578	0.00206344	1.40784	1.51775	1.39927
965.1	14.6016	36.7113	50.6641	77.1969	101.789	202.209	314.123	131.735	103.896	16.573	2.23924	0.71466			1065.2	0.44106				0.76313	0.754688	1.20858e-05	0.7547	0.90761	0.880572	0.000770594	0.881343	1.06832	1.02805	0.000579076	1.02862	1.15266	1.10546	0.00116171	1.10662	1.35114	1.28682	0.00151916	1.28834	1.4481	1.3653	0.00178725	1.36708	1.50973	1.43716	0.0021447	1.4393	1.54454	1.43107
965.8	14.3946	35.9998	50.1303	76.0852	100.902	199.848	311.028	130.167	103.134	16.6188	3.64334	0.97051			1065.9	0.44875				0.77714	0.769741	1.29387e-05	0.769754	0.92321	0.898494	0.000803125	0.899297	1.09018	1.04938	0.000604587	1.04999	1.17517	1.12863	0.00120733	1.12984	1.37848	1.31457	0.00157882	1.31615	1.47741	1.3953	0.00185744	1.39716	1.53851	1.46903	0.00222892	1.47126	1.57543	1.46338
966.5	14.1743	35.4813	49.4538	75.0931	99.3345	196.607	306.973	128.027	102.047	26.1939	80.7421	1.39959			1066.6	0.45719				0.79104	0.784986	1.38488e-05	0.785	0.94297	0.916652	0.000836927	0.917489	1.11276	1.07102	0.000631145	1.07165	1.19922	1.15212	0.00125461	1.15338	1.40799	1.34274	0.00164065	1.34438	1.50938	1.42576	0.00193018	1.42769	1.5729	1.5014	0.00231621	1.50371	1.60916	1.49622
967.2	13.9959	35.1399	48.473	73.8584	97.3419	193.464	302.622	360.247	162.218	221.564	95.5212	1.78115			1067.3	0.46516				0.80854	0.800421	1.48199e-05	0.800436	0.96427	0.935047	0.000872043	0.935919	1.13606	1.09295	0.000658788	1.0936	1.22687	1.17595	0.00130361	1.17725	1.43913	1.37132	0.00170472	1.37302	1.5417	1.45669	0.00200555	1.45869	1.60805	1.53427	0.00240666	1.53667	1.64589	1.52959
967.9	13.8389	34.7136	48.0175	72.9122	96.8278	191.734	298.332	413.619	337.21	289.201	95.4113	2.33131			1068	0.47797				0.83196	0.816046	1.58556e-05	0.816062	0.99038	0.953679	0.000908521	0.954588	1.16923	1.11517	0.000687556	1.11585	1.25951	1.20009	0.00135437	1.20145	1.47911	1.40031	0.0017711	1.40208	1.58599	1.48807	0.00208365	1.49016	1.65348	1.56764	0.00250038	1.57014	1.69161	1.56348
968.6	13.5925	34.0565	47.4351	71.9615	95.5433	188.538	293.562	408.696	333.657	287.475	94.4713	4.37522			1068.7	0.48854				0.85055	0.83186	1.69601e-05	0.831877	1.01414	0.972547	0.000946407	0.973493	1.19481	1.13768	0.000717493	1.1384	1.29033	1.22456	0.00140696	1.22597	1.5153	1.42972	0.00183987	1.43156	1.6263	1.51993	0.00216456	1.52209	1.69629	1.60151	0.00259747	1.60411	1.7342	1.5979
969.3	13.3721	33.6589	46.5801	70.9578	93.7778	185.396	289.534	402.903	329.837	284.184	96.2055	15.5597			1069.4	0.49716				0.86676	0.847863	1.81377e-05	0.847882	1.03514	0.99165	0.000985752	0.992636	1.22264	1.16049	0.00074864	1.16124	1.31917	1.24936	0.00146144	1.25082	1.54953	1.45954	0.00191112	1.46145	1.66303	1.55225	0.00224837	1.55449	1.7334	1.63589	0.00269805	1.63859	1.77378	1.63285
970	13.0737	32.9155	45.2064	69.0399	92.0026	182.558	284.184	395.913	323.892	287.74	262.422	19.7788			1070.1	0.50793				0.88695	0.864054	1.9393e-05	0.864074	1.05877	1.01099	0.00102661	1.01202	1.25026	1.18359	0.000781043	1.18437	1.34834	1.27449	0.00151787	1.276	1.58526	1.48978	0.0019849	1.49176	1.70137	1.58503	0.00233518	1.58737	1.77296	1.67078	0.00280222	1.67358	1.81384	1.66833
970.7	11.8195	32.0258	41.8504	67.0811	90.7403	179.887	280.285	390.571	319.374	289.534	285.167	20.5731			1070.8	0.51976				0.90594	0.880432	2.07307e-05	0.880453	1.08044	1.03056	0.00106902	1.03163	1.27703	1.20698	0.000814748	1.2078	1.37816	1.29993	0.00157631	1.30151	1.62218	1.52043	0.00206132	1.52249	1.7402	1.61829	0.00242509	1.62071	1.81301	1.70617	0.00291011	1.70908	1.85481	1.70435
971.4	11.508	31.3906	40.9261	65.9174	88.9611	176.482	276.312	384.503	315.791	285.102	281.968	21.3304			1071.5	0.52687				0.92109	0.896995	2.21559e-05	0.897017	1.09825	1.05037	0.00111305	1.05148	1.29688	1.23067	0.000849803	1.23152	1.39991	1.3257	0.00163682	1.32734	1.64665	1.55149	0.00214046	1.55363	1.76767	1.65201	0.00251819	1.65453	1.84204	1.74207	0.00302183	1.74509	1.88625	1.7409
972.1	11.2746	30.8674	39.9669	64.5654	86.896	173.34	271.456	378.007	310.027	280.35	277.524	23.9497			1072.2	0.5315				0.93068	0.913743	2.36741e-05	0.913767	1.10969	1.0704	0.00115875	1.07156	1.3128	1.25464	0.000886256	1.25553	1.41873	1.3518	0.00169948	1.3535	1.66763	1.58297	0.0022224	1.5852	1.78855	1.6862	0.00261459	1.68881	1.86638	1.77848	0.0031375	1.78161	1.91029	1.77799
972.8	10.9245	30.2691	37.4714	62.9072	85.6052	170.059	259.956	369.403	303.669	275.867	272.584	39.4003			1072.9	0.53864				0.94515	0.930674	2.5291e-05	0.9307	1.12798	1.09067	0.00120618	1.09187	1.33537	1.2789	0.000924159	1.27983	1.44112	1.37821	0.00176435	1.37998	1.69668	1.61487	0.00230723	1.61718	1.8218	1.72086	0.00271439	1.72357	1.89889	1.81539	0.00325726	1.81865	1.94357	1.81561
973.5	2.36265	1.05536	26.8534	40.281	3.57273	78.8134	225.528	363.413	299.778	272.521	269.215	46.1636			1073.6	0.54941				0.96339	0.947787	2.70125e-05	0.947814	1.15001	1.11117	0.00125539	1.11242	1.36207	1.30345	0.000963564	1.30442	1.46859	1.40495	0.0018315	1.40678	1.73021	1.64718	0.00239504	1.64957	1.85609	1.75598	0.0028177	1.7588	1.93553	1.85282	0.00338124	1.8562	1.98198	1.85378
974.2	0.61645	0.63592	0.84781	1.37025	1.49211	75.7705	220.953	359.667	502.574	500.611	343.637	180.302			1074.3	0.55924				0.98311	0.965081	2.88451e-05	0.96511	1.17328	1.13189	0.00130645	1.1332	1.38931	1.32829	0.00100453	1.3293	1.50003	1.43201	0.00190101	1.43391	1.76522	1.6799	0.00248594	1.68239	1.89671	1.79158	0.00292463	1.7945	1.97834	1.89075	0.00350956	1.89426	2.02349	1.89248
974.9	0.54664	0.56377	0.72845	1.20199	1.35238	74.2848	216.322	354.242	560.79	786.502	1010.65	1031.1			1075	0.56925				1.00184	0.982554	3.07955e-05	0.982585	1.19619	1.15284	0.00135942	1.1542	1.41482	1.35342	0.0010471	1.35446	1.52827	1.45938	0.00197294	1.46135	1.8026	1.71303	0.00258	1.71561	1.93553	1.82764	0.0030353	1.83068	2.01883	1.92919	0.00364236	1.93283	2.06776	1.93173
975.6	0.49946	0.51251	0.64953	1.09623	1.24194	72.5438	211.057	333.273	520.835	766.655	994.489	1054.63			1075.7	0.58237				1.02424	1.0002	3.28708e-05	1.00024	1.22433	1.17401	0.00141437	1.17543	1.45011	1.37882	0.00109134	1.37991	1.56387	1.48707	0.00204738	1.48912	1.84502	1.74658	0.00267735	1.74926	1.98335	1.86417	0.00314982	1.86732	2.06681	1.96814	0.00377979	1.97192	2.11787	1.97151
976.3	0.44576	0.44627	0.51015	0.56977	0.76524	32.434	147.401	251.246	462.488	753.356	977.913	1177.33			1076.4	0.59484				1.04689	1.01803	3.50784e-05	1.01806	1.25343	1.19541	0.00147135	1.19688	1.48286	1.40451	0.00113731	1.40565	1.60288	1.51508	0.00212441	1.5172	1.8893	1.78053	0.00277807	1.78331	2.03002	1.90116	0.00326832	1.90443	2.1169	2.0076	0.00392198	2.01152	2.1682	2.01183
977	0.37368	0.37034	0.39728	0.41899	0.43092	0.64032	1.45345	241.49	453.002	738.244	958.738	1227.16			1077.1	0.60618				1.06905	1.03603	3.74264e-05	1.03607	1.27879	1.21703	0.00153044	1.21856	1.51391	1.43048	0.00118508	1.43166	1.63682	1.5434	0.0022041	1.5456	1.92975	1.81489	0.00288228	1.81778	2.07396	1.93862	0.00339092	1.94201	2.16371	2.04756	0.0040691	2.05163	2.21615	2.05269
977.7	0.34245	0.33736	0.35785	0.37618	0.39446	0.54752	1.0522	237.028	444.939	723.436	938.858	1206.42			1077.8	0.61702				1.08668	1.0542	3.9923e-05	1.05424	1.30137	1.23887	0.0015917	1.24046	1.54135	1.45672	0.00123469	1.45796	1.66533	1.57203	0.00228653	1.57431	1.96562	1.84966	0.00299008	1.85265	2.11252	1.97655	0.00351774	1.98006	2.20546	2.08803	0.00422129	2.09225	2.25788	2.0941
978.4	0.31666	0.31805	0.33151	0.34658	0.35547	0.48843	0.89702	233.615	436.214	695.344	859.211	1186.31			1078.5	0.62748				1.10841	1.07254	4.25771e-05	1.07258	1.32526	1.26092	0.00165521	1.26258	1.57	1.48325	0.00128622	1.48453	1.69707	1.60096	0.0023718	1.60334	2.00447	1.88483	0.00310158	1.88793	2.15427	2.01493	0.00364892	2.01858	2.24957	2.129	0.0043787	2.13338	2.30409	2.13604
979.1	0.29778	0.30297	0.30367	0.32344	0.3335	0.43451	0.71138	20.9411	358.344	523.359	838.687	1164.39			1079.2	0.63988				1.13006	1.09105	4.5398e-05	1.09109	1.35176	1.28319	0.00172105	1.28491	1.60029	1.51004	0.00133974	1.51138	1.72982	1.63021	0.00245998	1.63267	2.04409	1.92041	0.0032169	1.92362	2.19837	2.05378	0.00378459	2.05756	2.29351	2.17047	0.00454151	2.17502	2.34963	2.17851
979.8	0.27932	0.27504	0.28425	0.29662	0.30082	0.36274	0.48339	3.6216	240.381	484.619	821.297	1142.35			1079.9	0.64849				1.14525	1.10972	4.83955e-05	1.10977	1.3712	1.30567	0.00178928	1.30746	1.62405	1.5371	0.00139532	1.5385	1.75711	1.65976	0.00255118	1.66231	2.07683	1.95638	0.00333615	1.95971	2.23152	2.09308	0.00392489	2.097	2.32863	2.21245	0.00470986	2.21716	2.38726	2.22152
980.5	0.25586	0.25032	0.26008	0.26786	0.27196	0.32501	0.41229	3.29306	237.465	475.554	806.863	1122.54			1080.6	0.65599				1.16145	1.12856	5.15799e-05	1.12861	1.38899	1.32836	0.00185999	1.33022	1.64702	1.56444	0.00145302	1.56589	1.78074	1.6896	0.00264547	1.69225	2.10572	1.99275	0.00345946	1.99621	2.26412	2.13283	0.00406995	2.1369	2.36374	2.25492	0.00488394	2.25981	2.42214	2.26507
981.2	0.24182	0.24344	0.25171	0.25763	0.2665	0.30939	0.38628	3.11243	231.579	464.943	786.502	1093.45			1081.3	0.66619				1.17788	1.14755	5.49622e-05	1.14761	1.41059	1.35125	0.00193325	1.35319	1.67302	1.59203	0.00151292	1.59354	1.80884	1.71975	0.00274296	1.72249	2.13845	2.02951	0.00358695	2.0331	2.29932	2.17305	0.00421994	2.17727	2.40326	2.29789	0.00506392	2.30295	2.46207	2.30915
981.9	0.24105	0.23708	0.24378	0.25486	0.2602	0.30193	0.36551	3.26287	229.721	451.544	641.357	1077.71			1082	0.6792				1.20005	1.1667	5.85538e-05	1.16676	1.43714	1.37435	0.00200915	1.37636	1.7049	1.61989	0.00157509	1.62147	1.84332	1.75019	0.00284374	1.75303	2.18072	2.06667	0.00371873	2.07038	2.34477	2.21371	0.00437498	2.21808	2.45188	2.34135	0.00524998	2.3466	2.51131	2.35376
982.6	0.23372	0.23708	0.23862	0.24564	0.24969	0.28596	0.34269	2.63694	226.673	442.69	624.885	1061.7			1082.7	0.69263				1.22631	1.18601	6.23669e-05	1.18607	1.46859	1.39765	0.00208778	1.39974	1.74181	1.64801	0.00163962	1.64965	1.88495	1.78092	0.00294791	1.78387	2.22998	2.10421	0.00385496	2.10806	2.40104	2.25482	0.00453524	2.25935	2.50842	2.3853	0.00544229	2.39075	2.5704	2.3989
983.3	0.23238	0.22548	0.22972	0.24199	0.24457	0.27302	0.32137	2.84774	223.46	435.211	617.305	1046.89			1083.4	0.70876				1.25603	1.20547	6.64142e-05	1.20554	1.50522	1.42115	0.00216921	1.42332	1.78608	1.67638	0.00170658	1.67808	1.93063	1.81194	0.00305557	1.815	2.2877	2.14213	0.00399575	2.14613	2.46037	2.29637	0.00470088	2.30107	2.56921	2.42974	0.00564105	2.43539	2.63512	2.44456
984	0.23004	0.22574	0.23105	0.23627	0.23944	0.26736	0.31003	2.51652	218.877	425.305	608.415	1028.73			1084.1	0.72078				1.27673	1.22508	7.0709e-05	1.22515	1.53003	1.44484	0.00225354	1.44709	1.81719	1.705	0.00177605	1.70678	1.96426	1.84325	0.00316683	1.84641	2.32541	2.18044	0.00414124	2.18458	2.50496	2.33836	0.00487205	2.34323	2.61698	2.47467	0.00584645	2.48051	2.68164	2.49075
984.7	0.22459	0.22248	0.2262	0.22751	0.2341	0.26272	0.29861	2.80996	216.621	416.198	598.274	1001.15			1084.8	0.72812				1.28973	1.24484	7.52656e-05	1.24491	1.54597	1.46872	0.00234086	1.47106	1.83527	1.73387	0.00184812	1.73572	1.98701	1.87483	0.00328179	1.87811	2.35342	2.21912	0.00429157	2.22341	2.53454	2.38079	0.00504891	2.38584	2.64789	2.52007	0.00605869	2.52613	2.71519	2.53745
985.4	0.23004	0.22909	0.22761	0.23415	0.23578	0.26394	0.29771	2.37192	215.03	406.163	590.745	982.426			1085.5	0.73672				1.30647	1.26473	8.00988e-05	1.26481	1.56639	1.49279	0.00243126	1.49522	1.85994	1.76299	0.00192289	1.76491	2.01233	1.90669	0.00340057	1.91009	2.38616	2.25818	0.00444689	2.26263	2.56744	2.42365	0.00523164	2.42889	2.68411	2.56595	0.00627797	2.57223	2.75359	2.58468
986.1	0.23486	0.2231	0.22709	0.23378	0.23421	0.259	0.2904	0.36366	1.76767	112.59	92.8539	593.198			1086.2	0.74559				1.32495	1.28477	8.52242e-05	1.28486	1.58782	1.51704	0.00252484	1.51957	1.88712	1.79234	0.00200043	1.79434	2.04315	1.93882	0.00352327	1.94234	2.4227	2.2976	0.00460735	2.30221	2.60795	2.46695	0.00542041	2.47237	2.72898	2.6123	0.00650449	2.61881	2.79769	2.63241
986.8	0.22861	0.22993	0.2273	0.23036	0.23062	0.25474	0.28373	0.33381	0.4255	0.63988	1.29479	195.93			1086.9	0.76015				1.35145	1.30494	9.06583e-05	1.30503	1.62144	1.54148	0.0026217	1.5441	1.92531	1.82193	0.00208084	1.82401	2.08401	1.97122	0.00365001	1.97487	2.47172	2.33739	0.00477309	2.34216	2.66379	2.51066	0.0056154	2.51628	2.78356	2.65912	0.00673848	2.66586	2.85496	2.68066
987.5	0.23142	0.22919	0.23137	0.23249	0.23421	0.25556	0.28061	0.32337	0.41106	0.56195	1.10841	163.38			1087.6	0.77411				1.37562	1.32525	9.64184e-05	1.32534	1.65044	1.56608	0.00272194	1.56881	1.96065	1.85175	0.00216421	1.85391	2.12324	2.00388	0.00378091	2.00766	2.51652	2.37753	0.00494426	2.38248	2.71206	2.5548	0.00581678	2.56061	2.83727	2.70641	0.00698014	2.71339	2.90938	2.72941
988.2	0.23862	0.22657	0.22798	0.23469	0.23654	0.25781	0.27784	0.32449	0.4005	0.53248	0.98878	22.6308			1088.3	0.78361				1.39444	1.34568	0.000102523	1.34579	1.67225	1.59086	0.00282567	1.59369	1.98838	1.8818	0.00225065	1.88405	2.15328	2.0368	0.00391609	2.04072	2.55505	2.41803	0.00512103	2.42315	2.75613	2.59935	0.00602475	2.60537	2.88138	2.75415	0.0072297	2.76138	2.95597	2.77866
988.9	0.23588	0.23217	0.23094	0.23545	0.24233	0.25457	0.27568	0.31623	0.38976	0.49568	0.86716	3.6216			1089	0.7936				1.41026	1.36624	0.00010899	1.36635	1.69278	1.61581	0.00293298	1.61874	2.01187	1.91206	0.00234025	1.9144	2.17821	2.06997	0.00405567	2.07403	2.58702	2.45888	0.00530356	2.46418	2.78997	2.64431	0.00623949	2.65055	2.91676	2.80234	0.00748739	2.80983	2.99502	2.8284
989.6	0.23928	0.22972	0.23142	0.23475	0.23845	0.252	0.27842	0.31282	0.36957	0.46968	0.77929	2.5781			1089.7	0.80279				1.42659	1.38692	0.000115841	1.38704	1.71277	1.64092	0.003044	1.64396	2.03845	1.94255	0.00243311	1.94498	2.20699	2.10339	0.00419978	2.10759	2.6212	2.50007	0.00549202	2.50556	2.82748	2.68967	0.0064612	2.69613	2.95869	2.85098	0.00775344	2.85874	3.03739	2.87864
990.3	0.23437	0.22678	0.23238	0.23785	0.23768	0.24826	0.27365	0.30662	0.35867	0.44895	0.71763	1.47367			1090.4	0.81489				1.45011	1.40772	0.000123096	1.40784	1.7402	1.66619	0.00315882	1.66935	2.07396	1.97325	0.00252935	1.97578	2.24543	2.13706	0.00434855	2.14141	2.66686	2.54159	0.00568657	2.54728	2.87541	2.73543	0.00669008	2.74212	3.01162	2.90006	0.00802809	2.90809	3.08887	2.92936
991	0.2384	0.22657	0.23399	0.2373	0.23807	0.25293	0.2724	0.30409	0.35457	0.43823	0.62216	1.15239			1091.1	0.82699				1.47197	1.42863	0.000130778	1.42876	1.76807	1.69161	0.00327758	1.69489	2.10426	2.00415	0.00262907	2.00678	2.27982	2.17096	0.00450212	2.17546	2.71019	2.58345	0.00588738	2.58934	2.92348	2.78158	0.00692633	2.78851	3.06126	2.94958	0.0083116	2.95789	3.13979	2.98056
991.7	0.24155	0.23458	0.2319	0.23502	0.23873	0.25206	0.26959	0.30109	0.34818	0.42589	0.58857	0.95104			1091.8	0.8383				1.49245	1.44965	0.00013891	1.44979	1.79308	1.71718	0.00340038	1.72058	2.13354	2.03525	0.00273239	2.03799	2.31153	2.20509	0.00466061	2.20975	2.74726	2.62563	0.00609464	2.63172	2.96688	2.82812	0.00717017	2.83529	3.10456	2.99952	0.0086042	3.00813	3.18933	3.03223
992.4	0.24328	0.23458	0.23431	0.2401	0.24182	0.25457	0.27246	0.30186	0.35075	0.41841	0.55911	0.86119			1092.5	0.85212				1.51775	1.47078	0.000147516	1.47093	1.82264	1.7429	0.00352734	1.74643	2.1702	2.06655	0.00283942	2.06939	2.35505	2.23945	0.00482417	2.24427	2.79898	2.66813	0.00630853	2.67443	3.02065	2.87504	0.0074218	2.88246	3.16446	3.04989	0.00890616	3.0588	3.24863	3.08437
993.1	0.24401	0.23681	0.23999	0.24266	0.23939	0.25716	0.2746	0.3022	0.3419	0.40337	0.53469	0.80408			1093.2	0.86477				1.54383	1.492	0.000156622	1.49216	1.85567	1.76875	0.00365859	1.77241	2.21004	2.09804	0.00295027	2.10099	2.39552	2.27402	0.00499295	2.27901	2.84905	2.71094	0.00652924	2.71746	3.07751	2.92233	0.00768146	2.93001	3.22255	3.10067	0.00921775	3.10989	3.31207	3.13697
993.8	0.24077	0.23469	0.23867	0.24099	0.24339	0.2558	0.27302	0.30061	0.34182	0.40013	0.51558	0.75388			1093.9	0.877				1.56459	1.51333	0.000166255	1.51349	1.88018	1.79474	0.00379426	1.79854	2.24078	2.12972	0.00306507	2.13278	2.42941	2.30881	0.00516708	2.31398	2.89135	2.75405	0.00675695	2.76081	3.1232	2.96998	0.00794935	2.97793	3.2719	3.15186	0.00953922	3.1614	3.36279	3.19003
994.5	0.24451	0.24105	0.24283	0.24244	0.24848	0.259	0.27587	0.30402	0.34119	0.39582	0.50898	0.71928			1094.6	0.889				1.58855	1.53474	0.000176442	1.53492	1.91117	1.82086	0.00393447	1.8248	2.27667	2.16157	0.00318395	2.16475	2.46661	2.34381	0.00534671	2.34915	2.93765	2.79746	0.00699186	2.80445	3.17468	3.01799	0.00822571	3.02622	3.3243	3.20345	0.00987085	3.21332	3.41822	3.24353
995.2	0.24389	0.24055	0.23884	0.24643	0.24666	0.26236	0.27473	0.3069	0.33744	0.39138	0.49057	0.6722			1095.3	0.90116				1.60916	1.55624	0.000187214	1.55643	1.93464	1.8471	0.00407936	1.85118	2.30515	2.19359	0.00330703	2.1969	2.49862	2.379	0.00553201	2.38453	2.97715	2.84116	0.00723417	2.84839	3.21736	3.06636	0.00851078	3.07487	3.37365	3.25543	0.0102129	3.26564	3.46577	3.29747
995.9	0.24575	0.24474	0.24587	0.2494	0.25386	0.26188	0.28556	0.3074	0.34253	0.38788	0.47731	0.64565			1096	0.91411				1.6338	1.57782	0.000198602	1.57802	1.96653	1.87346	0.00422907	1.87769	2.33938	2.22578	0.00343444	2.22921	2.53805	2.41439	0.00572312	2.42011	3.02691	2.88514	0.00748408	2.89262	3.27115	3.11506	0.0088048	3.12386	3.42926	3.30779	0.0105658	3.31836	3.52533	3.35184
996.6	0.247	0.24491	0.25357	0.25252	0.25942	0.26792	0.28301	0.30789	0.33814	0.38362	0.47217	0.6213			1096.7	0.93411				1.6684	1.59948	0.000210637	1.59969	2.00632	1.89993	0.00438372	1.90432	2.39276	2.25813	0.00356632	2.26169	2.59777	2.44996	0.0059202	2.45588	3.09813	2.92939	0.00774181	2.93713	3.34811	3.1641	0.00910801	3.1732	3.51318	3.36053	0.0109296	3.37146	3.60745	3.40663
997.3	0.24649	0.24581	0.24831	0.25604	0.25936	0.27189	0.28333	0.30775	0.34277	0.38212	0.46494	0.60423			1097.4	0.94493				1.692	1.62121	0.000223354	1.62143	2.03657	1.92651	0.00454347	1.93105	2.42941	2.29062	0.00370281	2.29433	2.6333	2.48571	0.00612343	2.49184	3.1434	2.97391	0.00800756	2.98192	3.40173	3.21346	0.00942066	3.22288	3.56615	3.41363	0.0113048	3.42494	3.66691	3.46184
998	0.24929	0.24883	0.24694	0.25639	0.25633	0.27208	0.2853	0.31189	0.34064	0.3801	0.45614	0.59129			1098.1	0.95565				1.71277	1.64301	0.000236788	1.64324	2.06348	1.95319	0.00470847	1.9579	2.4615	2.32326	0.00384405	2.32711	2.6687	2.52164	0.00633296	2.52797	3.1864	3.01869	0.00828156	3.02697	3.44905	3.26314	0.00974301	3.27288	3.61743	3.4671	0.0116916	3.47879	3.71792	3.51745
998.7	0.2498	0.25194	0.2498	0.26086	0.26212	0.27422	0.29013	0.31405	0.34151	0.38309	0.45457	0.5703			1098.8	0.97118				1.7398	1.66486	0.000250978	1.66512	2.09315	1.97996	0.00487885	1.98484	2.49977	2.35604	0.00399018	2.36003	2.70894	2.55772	0.00654896	2.56427	3.23519	3.06371	0.00856403	3.07228	3.50187	3.31312	0.0100753	3.3232	3.67451	3.52091	0.0120904	3.533	3.78007	3.57346
999.4	0.24843	0.24729	0.25235	0.25674	0.2593	0.27612	0.29215	0.31666	0.34088	0.3808	0.44494	0.55463			1099.5	0.98356				1.75954	1.68678	0.00026596	1.68705	2.11934	2.00682	0.00505477	2.01187	2.52813	2.38895	0.00414136	2.3931	2.74473	2.59396	0.00677161	2.60074	3.27718	3.10898	0.00885519	3.11783	3.54895	3.36341	0.0104179	3.37383	3.72649	3.57505	0.0125014	3.58755	3.83089	3.62986
1000.1	0.24712	0.25154	0.25125	0.25745	0.26224	0.28041	0.29587	0.31791	0.34135	0.37949	0.44116	0.54325			1100.2	0.99655				1.78608	1.70875	0.000281778	1.70903	2.1503	2.03376	0.00523639	2.039	2.56626	2.42199	0.00429773	2.42629	2.78484	2.63035	0.0070011	2.63736	3.33043	3.15447	0.00915528	3.16362	3.60662	3.41398	0.0107709	3.42475	3.7853	3.62953	0.0129251	3.64245	3.89314	3.68664
1000.8	0.24723	0.25486	0.25427	0.2614	0.26687	0.2836	0.29799	0.3193	0.3469	0.37966	0.44381	0.53395			1100.9	1.01088				1.81426	1.73076	0.000298472	1.73105	2.18474	2.06078	0.00542386	2.0662	2.60916	2.45514	0.00445946	2.4596	2.83139	2.66688	0.00723759	2.67412	3.3861	3.20018	0.00946454	3.20965	3.6686	3.46483	0.0111348	3.47597	3.85035	3.68432	0.0133617	3.69768	3.96278	3.74378
1001.5	0.24883	0.25386	0.25609	0.26847	0.27133	0.28543	0.30019	0.32569	0.34682	0.37966	0.44259	0.53555			1101.6	1.02494				1.83865	1.75281	0.000316089	1.75312	2.21615	2.08786	0.00561736	2.09348	2.64606	2.48839	0.0046267	2.49302	2.87409	2.70355	0.00748128	2.71103	3.43558	3.24611	0.00978321	3.25589	3.72306	3.51595	0.0115097	3.52746	3.91021	3.73942	0.0138116	3.75324	4.02532	3.80128
1002.2	0.24854	0.25154	0.25739	0.26394	0.27033	0.28648	0.30033	0.32359	0.35188	0.38335	0.43772	0.52204			1102.3	1.03538				1.85866	1.77489	0.000334674	1.77523	2.23872	2.11501	0.00581704	2.12083	2.67485	2.52175	0.00479962	2.52655	2.90135	2.74033	0.00773235	2.74806	3.47376	3.29224	0.0101115	3.30235	3.76444	3.56733	0.0118959	3.57923	3.9564	3.79482	0.0142751	3.8091	4.0738	3.85913
1002.9	0.24541	0.25044	0.25906	0.2662	0.27177	0.29067	0.30577	0.32569	0.35051	0.3815	0.43843	0.51133			1103	1.05099				1.88538	1.79701	0.000354276	1.79736	2.27196	2.14221	0.00602307	2.14823	2.71394	2.5552	0.00497839	2.56018	2.94849	2.77723	0.007991	2.78522	3.52939	3.33856	0.0104498	3.34901	3.82648	3.61896	0.0122938	3.63125	4.01976	3.8505	0.0147526	3.86526	4.13809	3.91731
1003.6	0.25038	0.25651	0.2605	0.26656	0.27498	0.29614	0.31067	0.33512	0.35662	0.38869	0.44015	0.51251			1103.7	1.0639				1.91029	1.81914	0.000374947	1.81952	2.30356	2.16946	0.00623563	2.1757	2.75296	2.58873	0.00516318	2.59389	2.9902	2.81423	0.00825743	2.82249	3.58014	3.38506	0.0107982	3.39585	3.8815	3.67082	0.0127037	3.68352	4.07943	3.90646	0.0152445	3.92171	4.20243	3.97581
1004.3	0.249	0.25663	0.26903	0.27561	0.28035	0.3004	0.32263	0.33939	0.36433	0.39802	0.44473	0.51499			1104.4	1.07473				1.93375	1.8413	0.00039674	1.84169	2.3297	2.19675	0.00645489	2.20321	2.78548	2.62234	0.00535417	2.62769	3.02622	2.85133	0.00853184	2.85987	3.62744	3.43173	0.011157	3.44288	3.93188	3.72291	0.0131259	3.73604	4.13523	3.96268	0.0157511	3.97843	4.25598	4.03463
1005	0.24946	0.26369	0.26755	0.2758	0.28009	0.30276	0.32166	0.34182	0.36635	0.39646	0.44177	0.50793			1105.1	1.08643				1.95119	1.86346	0.000419709	1.86388	2.35396	2.22408	0.00668104	2.23076	2.81514	2.65601	0.00555154	2.66156	3.05844	2.88852	0.00881443	2.89734	3.66606	3.47856	0.0115266	3.49008	3.97741	3.77521	0.0135607	3.78877	4.18312	4.01915	0.0162728	4.03542	4.30725	4.09375
1005.7	0.24769	0.2558	0.26742	0.27842	0.28333	0.30409	0.32077	0.34119	0.36762	0.39792	0.44015	0.50165			1105.8	1.09749				1.97151	1.88563	0.000443915	1.88607	2.38013	2.25143	0.00691426	2.25835	2.84643	2.68974	0.00575547	2.6955	3.09101	2.92579	0.00910542	2.9349	3.70681	3.52554	0.0119071	3.53744	4.02254	3.82772	0.0140083	3.84173	4.22863	4.07586	0.01681	4.09267	4.35612	4.15316
1006.4	0.2466	0.25882	0.26552	0.27791	0.28009	0.30549	0.32278	0.34293	0.36813	0.40151	0.44188	0.49969			1106.5	1.11045				1.99618	1.9078	0.000469416	1.90827	2.40991	2.2788	0.00715474	2.28596	2.88005	2.72353	0.00596616	2.72949	3.13184	2.96313	0.00940501	2.97253	3.75837	3.57265	0.0122989	3.58495	4.07943	3.88041	0.0144693	3.89488	4.29042	4.13279	0.0173631	4.15015	4.42181	4.21285
1007.1	0.24786	0.25996	0.27064	0.28582	0.289	0.31153	0.32878	0.35253	0.37618	0.40598	0.44771	0.50594			1107.2	1.12564				2.02722	1.92996	0.000496277	1.93045	2.44456	2.30619	0.00740267	2.31359	2.9255	2.75735	0.00618379	2.76353	3.18053	3.00052	0.00971344	3.01023	3.81768	3.6199	0.0127022	3.6326	4.14381	3.93329	0.0149438	3.94823	4.35913	4.18994	0.0179325	4.20787	4.49366	4.2728
1007.8	0.24774	0.25894	0.27071	0.2853	0.2904	0.31304	0.33535	0.35727	0.37801	0.40823	0.45363	0.50641			1107.9	1.13632				2.04786	1.9521	0.000524563	1.95263	2.46831	2.33358	0.00765824	2.34124	2.95801	2.7912	0.00640858	2.79761	3.21366	3.03797	0.0100309	3.048	3.85834	3.66725	0.0131174	3.68037	4.1889	3.98633	0.0154322	4.00176	4.40961	4.24728	0.0185186	4.2658	4.54674	4.333
1008.5	0.24401	0.2599	0.27277	0.28275	0.29275	0.31543	0.33174	0.35703	0.38045	0.40879	0.45384	0.50315			1108.6	1.1434				2.06205	1.97423	0.000554344	1.97478	2.48714	2.36096	0.00792166	2.36888	2.97852	2.82508	0.00664071	2.83172	3.23817	3.07545	0.0103577	3.08581	3.89045	3.71472	0.0135447	3.72826	4.22669	4.03953	0.0159349	4.05546	4.45041	4.30481	0.0191219	4.32394	4.58775	4.39344
1009.2	0.24227	0.25852	0.27064	0.28216	0.2888	0.31456	0.33435	0.35736	0.38539	0.412	0.45311	0.5035			1109.3	1.15744				2.08641	1.99632	0.000585691	1.99691	2.51826	2.38834	0.00819312	2.39653	3.01717	2.85898	0.00688041	2.86586	3.2802	3.11296	0.0106939	3.12366	3.94003	3.76227	0.0139844	3.77625	4.28154	4.09286	0.0164522	4.10931	4.50713	4.36252	0.0197427	4.38226	4.64836	4.4541
1009.9	0.24055	0.26038	0.27227	0.28582	0.29451	0.31886	0.33939	0.36484	0.38654	0.4162	0.4553	0.50431			1110	1.16762				2.10378	2.01839	0.000618678	2.01901	2.54039	2.4157	0.00847285	2.42417	3.04369	2.89287	0.00712787	2.9	3.30902	3.1505	0.01104	3.16154	3.97649	3.8099	0.0144369	3.82434	4.32414	4.14632	0.0169845	4.16331	4.55617	4.42038	0.0203815	4.44076	4.69786	4.51497
1010.6	0.24468	0.26266	0.27359	0.291	0.29847	0.32621	0.34778	0.36821	0.39455	0.42316	0.46121	0.51204			1110.7	1.17951				2.1252	2.04041	0.000653385	2.04107	2.56626	2.44303	0.00876104	2.45179	3.07751	2.92676	0.00738333	2.93415	3.3458	3.18804	0.011396	3.19944	4.02532	3.8576	0.0149024	3.8725	4.37421	4.1999	0.0175322	4.21743	4.60787	4.47839	0.0210387	4.49943	4.75664	4.57604
1011.3	0.24216	0.26971	0.28255	0.29512	0.3036	0.32961	0.34986	0.37497	0.39967	0.42786	0.46387	0.51523			1111.4	1.19179				2.14981	2.06239	0.000689892	2.06308	2.59537	2.47032	0.00905792	2.47938	3.11172	2.96064	0.00764699	2.96829	3.38376	3.22558	0.0117622	3.23734	4.07099	3.90535	0.0153813	3.92073	4.42792	4.25358	0.0180957	4.27168	4.66552	4.53653	0.0217148	4.55825	4.81282	4.63729
1012	0.24021	0.26613	0.28145	0.29594	0.30825	0.33327	0.35278	0.37949	0.39939	0.43301	0.46946	0.5182			1112.1	1.20504				2.1757	2.08432	0.000728284	2.08505	2.62724	2.49758	0.0093637	2.50694	3.15137	2.99449	0.0079191	3.00241	3.42847	3.26311	0.0121389	3.27525	4.12762	3.95314	0.015874	3.96902	4.49055	4.30735	0.0186752	4.32602	4.73151	4.59479	0.0224103	4.6172	4.88315	4.6987
1012.7	0.24194	0.2654	0.27925	0.29662	0.30514	0.33037	0.35604	0.38045	0.40402	0.43152	0.4749	0.51298			1112.8	1.21479				2.19432	2.10618	0.000768649	2.10695	2.65216	2.52478	0.00967861	2.53446	3.1798	3.02831	0.00819987	3.03651	3.46099	3.30062	0.0125264	3.31315	4.16869	4.00097	0.0163806	4.01735	4.53524	4.36119	0.0192713	4.38046	4.77969	4.65314	0.0231256	4.67627	4.93628	4.76027
1013.4	0.23961	0.26595	0.27919	0.29992	0.30437	0.33381	0.35909	0.38353	0.40607	0.43652	0.47753	0.51952			1113.5	1.22857				2.21718	2.12798	0.000811078	2.12879	2.67917	2.55193	0.0100029	2.56193	3.21588	3.06209	0.00848955	3.07058	3.49865	3.3381	0.0129248	3.35102	4.21599	4.04881	0.0169017	4.06571	4.58775	4.41509	0.0198843	4.43497	4.83393	4.71158	0.0238612	4.73545	4.99344	4.82197
1014.1	0.23725	0.26632	0.28203	0.2995	0.31139	0.33791	0.3635	0.39039	0.41381	0.4432	0.47962	0.52095			1114.2	1.24137				2.24233	2.14971	0.000855668	2.15057	2.71019	2.57901	0.0103367	2.58934	3.25462	3.09581	0.00878838	3.1046	3.53916	3.37553	0.0133345	3.38886	4.26678	4.09665	0.0174375	4.11408	4.64515	4.46903	0.0205147	4.48954	4.89553	4.7701	0.0246176	4.79472	5.05825	4.88379
1014.8	0.2379	0.26841	0.28275	0.30528	0.31572	0.34642	0.36898	0.39546	0.41725	0.44844	0.48618	0.53076			1114.9	1.25372				2.26464	2.17136	0.000902517	2.17226	2.73716	2.60601	0.0106804	2.61669	3.287	3.12947	0.00909661	3.13856	3.57767	3.4129	0.0137558	3.42666	4.3142	4.14448	0.0179883	4.16246	4.69894	4.523	0.0211627	4.54417	4.95678	4.82867	0.0253953	4.85406	5.12153	4.94572
1015.5	0.23779	0.27152	0.28655	0.30577	0.31572	0.35091	0.37627	0.40013	0.42413	0.45499	0.49477	0.53852			1115.6	1.26241				2.28087	2.19292	0.000951729	2.19387	2.75931	2.63293	0.0110341	2.64396	3.31284	3.16305	0.00941448	3.17247	3.6033	3.45021	0.0141888	3.4644	4.35211	4.19228	0.0185546	4.21084	4.73915	4.57699	0.021829	4.59882	4.99919	4.88727	0.0261948	4.91347	5.16654	5.00774
1016.2	0.23851	0.27096	0.2896	0.31003	0.32077	0.35392	0.37783	0.403	0.42904	0.46026	0.49591	0.54313			1116.3	1.27174				2.29932	2.21438	0.00100341	2.21538	2.78227	2.65976	0.0113982	2.67116	3.34118	3.19655	0.00974226	3.20629	3.6358	3.48745	0.014634	3.50208	4.39137	4.24005	0.0191367	4.25919	4.7841	4.63098	0.0225138	4.6535	5.04661	4.94591	0.0270165	4.97292	5.22035	5.06983
1016.9	0.23578	0.27315	0.29221	0.31391	0.32449	0.36033	0.38433	0.41467	0.43924	0.46806	0.50687	0.54866			1117	1.28056				2.31793	2.23575	0.00105767	2.2368	2.8035	2.68649	0.0117728	2.69826	3.36744	3.22996	0.0100802	3.24004	3.66691	3.52459	0.0150915	3.53969	4.432	4.28776	0.019735	4.3075	4.82614	4.68496	0.0232176	4.70818	5.09683	5.00455	0.0278612	5.03241	5.26987	5.13198
1017.6	0.23686	0.27158	0.29594	0.31776	0.33052	0.36627	0.3903	0.41629	0.44218	0.47523	0.51168	0.5559			1117.7	1.29271				2.33722	2.257	0.00111463	2.25812	2.82748	2.71311	0.0121582	2.72527	3.39703	3.26326	0.0104286	3.27369	3.70084	3.56164	0.0155616	3.5772	4.47301	4.33541	0.0203498	4.35576	4.87528	4.7389	0.0239409	4.76284	5.14873	5.06318	0.0287291	5.09191	5.32353	5.19416
1018.3	0.23507	0.27397	0.29635	0.31601	0.3306	0.36299	0.39355	0.41918	0.44484	0.47599	0.51464	0.55552			1118.4	1.29658				2.34639	2.27815	0.00117441	2.27932	2.83923	2.73961	0.0125547	2.75217	3.41271	3.29644	0.0107877	3.30723	3.71792	3.59858	0.0160447	3.61462	4.49469	4.38298	0.0209815	4.40397	4.90117	4.7928	0.0246842	4.81749	5.17726	5.12178	0.029621	5.1514	5.35303	5.25637
1019	0.22972	0.27397	0.29404	0.3196	0.33343	0.3694	0.39719	0.42306	0.44988	0.48206	0.5218	0.56131			1119.1	1.30407				2.36265	2.29917	0.00123713	2.3004	2.86022	2.76599	0.0129625	2.77895	3.43954	3.32951	0.0111578	3.34066	3.74542	3.63539	0.016541	3.65193	4.53419	4.43046	0.0216306	4.45209	4.94425	4.84664	0.0254478	4.87209	5.22396	5.18035	0.0305373	5.21089	5.40505	5.31859
1019.7	0.22967	0.27638	0.29765	0.32412	0.33775	0.3767	0.40207	0.42875	0.46004	0.48922	0.52626	0.57095			1119.8	1.31462				2.38342	2.32006	0.00130293	2.32136	2.88669	2.79223	0.0133819	2.80561	3.47056	3.36243	0.0115391	3.37397	3.78268	3.67207	0.0170509	3.68912	4.57615	4.47783	0.0222974	4.50013	4.99459	4.90041	0.0262322	4.92664	5.27716	5.23885	0.0314787	5.27033	5.45884	5.38079
1020.4	0.23318	0.27951	0.30318	0.33174	0.34682	0.38512	0.41438	0.43964	0.46687	0.49911	0.54188	0.58304			1120.5	1.31947				2.39056	2.34082	0.00137193	2.34219	2.89801	2.81833	0.0138132	2.83214	3.48418	3.39521	0.011932	3.40714	3.79665	3.7086	0.0175747	3.72618	4.60151	4.52507	0.0229823	4.54806	5.01996	4.95408	0.027038	4.98112	5.30762	5.29728	0.0324456	5.32973	5.49161	5.44297
1021.1	0.23372	0.2819	0.30747	0.33535	0.35237	0.39066	0.41918	0.44679	0.47435	0.50664	0.54714	0.5917			1121.2	1.3277				2.4088	2.36143	0.00144428	2.36287	2.9181	2.84428	0.0142566	2.85854	3.50913	3.42783	0.0123368	3.44017	3.82737	3.74498	0.0181126	3.76309	4.6366	4.57218	0.0236857	4.59587	5.06291	5.00764	0.0278655	5.03551	5.35057	5.35562	0.0334386	5.38906	5.53988	5.50509
1021.8	0.23286	0.28327	0.30953	0.33963	0.35261	0.39719	0.42599	0.45352	0.47918	0.51274	0.55132	0.59662			1121.9	1.33999				2.42996	2.38189	0.00152012	2.38341	2.94713	2.87007	0.0147124	2.88478	3.54487	3.46028	0.0127537	3.47304	3.86456	3.78119	0.018665	3.79985	4.6849	4.61914	0.0244081	4.64355	5.11682	5.06108	0.0287154	5.0898	5.41253	5.41385	0.0344584	5.44831	5.60402	5.56716
1022.5	0.23367	0.28642	0.3147	0.3408	0.35992	0.40179	0.43033	0.45656	0.48697	0.51868	0.55731	0.60256			1122.6	1.35176				2.45414	2.4022	0.0015996	2.4038	2.97372	2.89569	0.0151809	2.91087	3.58096	3.49256	0.0131831	3.50574	3.90481	3.81721	0.0192322	3.83644	4.73696	4.66593	0.0251498	4.69108	5.17488	5.11438	0.029588	5.14397	5.4752	5.47195	0.0355056	5.50745	5.67022	5.62914
1023.2	0.23276	0.289	0.31405	0.34618	0.36216	0.40551	0.43732	0.46355	0.49102	0.52276	0.56689	0.61207			1123.3	1.36207				2.47343	2.42235	0.00168288	2.42403	2.99916	2.92113	0.0156625	2.93679	3.6116	3.52465	0.0136252	3.53827	3.93822	3.85305	0.0198145	3.87286	4.78079	4.71254	0.0259113	4.73845	5.22276	5.16752	0.0304839	5.198	5.52713	5.5299	0.0365807	5.56648	5.72664	5.69102
1023.9	0.23292	0.29141	0.32011	0.35051	0.36923	0.41581	0.44137	0.47174	0.49923	0.5304	0.5728	0.61745			1124	1.37531				2.49977	2.44232	0.00177012	2.44409	3.03319	2.94639	0.0161573	2.96255	3.6509	3.55653	0.0140805	3.57061	3.98199	3.88868	0.0204124	3.90909	4.83727	4.75895	0.0266931	4.78564	5.28567	5.22048	0.0314036	5.25189	5.595	5.58769	0.0376843	5.62537	5.79696	5.75277
1024.6	0.23238	0.29255	0.31989	0.35506	0.37359	0.41937	0.44999	0.47753	0.50559	0.54075	0.5805	0.63052			1124.7	1.3858				2.52	2.46212	0.00186148	2.46398	3.05703	2.97145	0.0166656	2.98812	3.68468	3.58821	0.0145491	3.60276	4.01883	3.92409	0.021026	3.94512	4.88652	4.80515	0.0274955	4.83265	5.34195	5.27326	0.0323477	5.30561	5.65718	5.6453	0.0388172	5.68412	5.85868	5.81439
1025.3	0.2327	0.29676	0.32681	0.36124	0.37949	0.42628	0.4593	0.48831	0.51594	0.55093	0.59156	0.63738			1125.4	1.39894				2.54331	2.48173	0.00195715	2.48369	3.08603	2.99631	0.0171879	3.0135	3.72135	3.61967	0.0150315	3.6347	4.06163	3.95928	0.0216557	3.98093	4.93628	4.85113	0.0283191	4.87945	5.39883	5.32583	0.0333165	5.35915	5.71874	5.70271	0.0399798	5.74269	5.92789	5.87586
1026	0.23469	0.3029	0.33121	0.36703	0.38735	0.43561	0.46774	0.49751	0.5265	0.5604	0.59924	0.64908			1126.1	1.41124				2.56567	2.50115	0.00205729	2.50321	3.11387	3.02096	0.0177243	3.03868	3.75751	3.65089	0.015528	3.66642	4.1011	3.99422	0.022302	4.01653	4.9877	4.89686	0.0291642	4.92603	5.45884	5.37818	0.0343108	5.41249	5.78229	5.7599	0.041173	5.80108	5.99377	5.93715
1026.7	0.23572	0.30613	0.33659	0.37446	0.39555	0.44259	0.47577	0.50408	0.53456	0.56546	0.60968	0.6563			1126.8	1.42102				2.58702	2.52037	0.0021621	2.52253	3.13979	3.04538	0.0182752	3.06366	3.78966	3.68187	0.0160389	3.69791	4.13523	4.02892	0.0229651	4.05188	5.03385	4.94234	0.0300313	4.97237	5.51188	5.43028	0.035331	5.46561	5.83983	5.81686	0.0423972	5.85926	6.0562	5.99824
1027.4	0.23448	0.30711	0.34182	0.38089	0.39985	0.44978	0.48128	0.51215	0.54063	0.5757	0.61645	0.66466			1127.5	1.43648				2.61517	2.53939	0.00227177	2.54166	3.17614	3.06958	0.0188409	3.08842	3.83442	3.7126	0.0165646	3.72916	4.18504	4.06335	0.0236455	4.087	5.09683	4.98755	0.030921	5.01847	5.58085	5.48213	0.0363777	5.51851	5.91289	5.87357	0.0436532	5.91722	6.13479	6.05912
1028.1	0.23616	0.30996	0.34674	0.38663	0.40738	0.461	0.49306	0.5236	0.5503	0.58277	0.62546	0.67189			1128.2	1.45211				2.64484	2.55819	0.00238649	2.56058	3.21144	3.09354	0.0194217	3.11296	3.87704	3.74306	0.0171054	3.76017	4.23058	4.09751	0.0243434	4.12185	5.15941	5.03247	0.0318337	5.0643	5.65067	5.5337	0.0374514	5.57115	5.99101	5.93	0.0449417	5.97494	6.21441	6.11977
1028.8	0.23659	0.31326	0.35035	0.38922	0.41153	0.46526	0.50003	0.52942	0.55924	0.59265	0.63241	0.67936			1128.9	1.45915				2.6595	2.57678	0.00250646	2.57928	3.22998	3.11725	0.0200179	3.13727	3.90122	3.77325	0.0176616	3.79091	4.26187	4.13137	0.0250593	4.15643	5.19757	5.07709	0.0327698	5.10986	5.69377	5.58499	0.0385527	5.62354	6.0381	5.98615	0.0462632	6.03241	6.26758	6.18016
1029.5	0.23681	0.31615	0.35286	0.39455	0.41831	0.47293	0.50828	0.53753	0.56442	0.59759	0.64106	0.68913			1129.6	1.47571				2.68844	2.59514	0.00263192	2.59777	3.26814	3.14071	0.0206299	3.16134	3.9473	3.80316	0.0182337	3.82139	4.31023	4.16494	0.0257934	4.19074	5.26017	5.12139	0.0337299	5.15512	5.76501	5.63596	0.0396822	5.67564	6.11505	6.04198	0.0476186	6.0896	6.34746	6.24029
1030.2	0.23405	0.31747	0.35408	0.39967	0.42121	0.47764	0.51369	0.54175	0.56728	0.60381	0.6418	0.69231			1130.3	1.48388				2.7052	2.61326	0.00276306	2.61603	3.287	3.1639	0.021258	3.18516	3.97009	3.83277	0.018822	3.85159	4.3401	4.1982	0.0265463	4.22475	5.29663	5.16537	0.0347144	5.20008	5.80764	5.68661	0.0408404	5.72745	6.16311	6.09749	0.0490085	6.1465	6.39735	6.30012
1030.9	0.23475	0.31871	0.35818	0.40188	0.42179	0.48295	0.51618	0.54714	0.57557	0.60842	0.64744	0.69679			1131	1.4983				2.73401	2.63115	0.00290012	2.63405	3.32277	3.18682	0.0219025	3.20873	4.01698	3.86207	0.0194269	3.88149	4.38834	4.23114	0.0273182	4.25846	5.3592	5.20899	0.0357239	5.24472	5.87895	5.73692	0.0420281	5.77894	6.23878	6.15265	0.0504337	6.20309	6.48187	6.35964
1031.6	0.23367	0.31908	0.36141	0.40504	0.42964	0.48978	0.52336	0.55233	0.58318	0.6132	0.65208	0.69968			1131.7	1.51008				2.75867	2.64879	0.00304333	2.65184	3.35351	3.20947	0.0225638	3.23203	4.05509	3.89105	0.0200487	3.9111	4.432	4.26374	0.0281097	4.29185	5.41377	5.25226	0.0367588	5.28902	5.94292	5.78686	0.0432456	5.83011	6.30957	6.20745	0.0518948	6.25935	6.5539	6.41883
1032.3	0.23265	0.32412	0.36593	0.41115	0.43682	0.49671	0.53248	0.56208	0.58952	0.6223	0.6613	0.70778			1132.4	1.5181				2.77013	2.66618	0.00319294	2.66937	3.36822	3.23182	0.0232421	3.25506	4.07474	3.91971	0.0206879	3.9404	4.45451	4.29599	0.0289209	4.32492	5.44628	5.29515	0.0378197	5.33297	5.97585	5.83643	0.0444938	5.88093	6.34892	6.26187	0.0533925	6.31526	6.59629	6.47767
1033	0.23464	0.32976	0.37085	0.41899	0.44504	0.50699	0.54425	0.57438	0.5991	0.63052	0.67344	0.71829			1133.1	1.53073				2.79576	2.68331	0.00334919	2.68666	3.39938	3.25388	0.0239379	3.27781	4.11623	3.94803	0.0213449	3.96937	4.4978	4.32789	0.0297525	4.35765	5.50427	5.33764	0.0389071	5.37655	6.04227	5.88561	0.0457731	5.93138	6.418	6.31589	0.0549277	6.37081	6.67268	6.53615
1033.7	0.23917	0.33589	0.37792	0.42737	0.45415	0.51964	0.55642	0.58425	0.61249	0.64491	0.68454	0.72979			1133.8	1.54099				2.81514	2.70018	0.00351233	2.70369	3.42689	3.27563	0.0246515	3.30028	4.14859	3.976	0.02202	3.99802	4.53419	4.35942	0.0306047	4.39003	5.55137	5.37973	0.0400215	5.41975	6.09818	5.93438	0.0470841	5.98146	6.47888	6.36948	0.056501	6.42598	6.73597	6.59423
1034.4	0.23961	0.3383	0.3838	0.43521	0.46398	0.52991	0.56741	0.59951	0.6246	0.65539	0.69759	0.74525			1134.5	1.55274				2.83661	2.71677	0.00368264	2.72045	3.45144	3.29707	0.0253832	3.32245	4.18215	4.00361	0.0227136	4.02633	4.57088	4.39057	0.031478	4.42205	5.59758	5.4214	0.0411635	5.46256	6.15035	5.98272	0.0484276	6.03114	6.53883	6.42264	0.0581132	6.48075	6.79986	6.65191
1035.1	0.24049	0.34364	0.3912	0.44218	0.47435	0.53988	0.5777	0.61038	0.63694	0.66881	0.7086	0.7544			1135.2	1.56315				2.85627	2.73309	0.00386039	2.73695	3.47937	3.31819	0.0261334	3.34432	4.2092	4.03086	0.0234262	4.05429	4.60681	4.42133	0.0323727	4.4537	5.64417	5.46263	0.0423336	5.50496	6.20297	6.03061	0.0498042	6.08041	6.59629	6.47534	0.0597651	6.53511	6.8612	6.70915
1035.8	0.24581	0.3493	0.40004	0.45415	0.48306	0.55246	0.59156	0.62273	0.65238	0.68265	0.7246	0.76842			1135.9	1.57				2.8721	2.74912	0.00404585	2.75316	3.49623	3.33898	0.0269025	3.36588	4.23545	4.05773	0.0241581	4.08188	4.6334	4.45168	0.0332894	4.48497	5.68329	5.50341	0.0435323	5.54694	6.24741	6.07804	0.0512145	6.12926	6.64508	6.52757	0.0614574	6.58903	6.91194	6.76595
1036.5	0.24615	0.35555	0.40588	0.46238	0.49193	0.56351	0.60395	0.63694	0.66328	0.69647	0.73384	0.77732			1136.6	1.58307				2.89601	2.76486	0.00423933	2.7691	3.52614	3.35943	0.0276908	3.38712	4.27169	4.0842	0.0249099	4.10911	4.67627	4.48162	0.0342284	4.51584	5.73588	5.54372	0.0447602	5.58848	6.30812	6.125	0.0526591	6.17765	6.71274	6.5793	0.0631909	6.64249	6.98715	6.82228
1037.2	0.24564	0.36025	0.41181	0.47076	0.49946	0.57557	0.61631	0.64521	0.67515	0.70469	0.74353	0.78904			1137.3	1.58891				2.90804	2.7803	0.00444111	2.78475	3.5416	3.37954	0.0284986	3.40803	4.29438	4.11028	0.0256819	4.13596	4.69894	4.51113	0.0351902	4.54632	5.77032	5.58355	0.0460179	5.62957	6.34892	6.17145	0.0541387	6.22559	6.75616	6.63052	0.0649665	6.69549	7.0291	6.87813
1037.9	0.24723	0.36517	0.41773	0.47599	0.50699	0.58479	0.62532	0.65857	0.6836	0.71565	0.75318	0.79763			1138	1.60214				2.93089	2.79545	0.00465151	2.8001	3.57273	3.39929	0.0293264	3.42862	4.33212	4.13595	0.0264745	4.16243	4.74024	4.5402	0.0361751	4.57638	5.82237	5.62289	0.047306	5.67019	6.40914	6.2174	0.0556541	6.27306	6.82496	6.68121	0.0667849	6.748	7.10395	6.93346
1038.6	0.24808	0.36779	0.42131	0.48206	0.51357	0.59115	0.63445	0.66604	0.69215	0.72327	0.76015	0.80445			1138.7	1.6099				2.94713	2.81028	0.00487084	2.81515	3.59087	3.41869	0.0301746	3.44886	4.35612	4.1612	0.0272882	4.18849	4.7676	4.56883	0.0371837	4.60601	5.85868	5.66171	0.0486249	5.71034	6.45208	6.26282	0.0572057	6.32002	6.87385	6.73136	0.0686469	6.8	7.15484	6.98828
1039.3	0.24751	0.37094	0.42737	0.48967	0.52216	0.59965	0.64417	0.67608	0.70162	0.73114	0.76966	0.81227			1139.4	1.61585				2.95937	2.8248	0.00509942	2.8299	3.60745	3.43772	0.0310434	3.46876	4.37623	4.18603	0.0281235	4.21415	4.79181	4.597	0.0382164	4.63521	5.89115	5.70001	0.0499753	5.74999	6.49083	6.30769	0.0587944	6.36649	6.91512	6.78093	0.0705533	6.85149	7.20278	7.04254
1040	0.24866	0.37497	0.43431	0.499	0.53125	0.61193	0.6569	0.68612	0.71499	0.74319	0.78253	0.82281			1140.1	1.6248				2.97852	2.839	0.0053376	2.84434	3.63162	3.45637	0.0319333	3.4883	4.40961	4.21041	0.0289808	4.23939	4.82836	4.6247	0.0392735	4.66397	5.94155	5.73778	0.0513577	5.78913	6.54636	6.352	0.0604208	6.41242	6.97429	6.82992	0.072505	6.90243	7.26775	7.09624
1040.7	0.25217	0.3838	0.44381	0.50781	0.54363	0.62517	0.67035	0.70162	0.72929	0.75648	0.79378	0.83772			1140.8	1.63117				2.99226	2.85288	0.00558571	2.85846	3.65006	3.47464	0.0328446	3.50749	4.43302	4.23435	0.0298604	4.26421	4.854	4.65192	0.0403557	4.69227	5.97585	5.77499	0.0527728	5.82776	6.59022	6.39574	0.0620857	6.45782	7.02263	6.87831	0.0745028	6.95282	7.31981	7.14936
1041.4	0.25704	0.38994	0.45092	0.51808	0.55437	0.63782	0.68344	0.71532	0.74148	0.77126	0.80519	0.8482			1141.5	1.6387				3.00746	2.86642	0.00584412	2.87227	3.66606	3.49253	0.0337778	3.5263	4.45554	4.25784	0.0307631	4.2886	4.87978	4.67865	0.0414632	4.72011	6.01312	5.81163	0.0542211	5.86585	6.62979	6.43888	0.0637896	6.50267	7.06806	6.92608	0.0765475	7.00263	7.36885	7.20187
1042.1	0.25674	0.39637	0.45878	0.52966	0.56455	0.65238	0.69839	0.73164	0.75596	0.7865	0.82243	0.86417			1142.2	1.64324				3.01787	2.87963	0.00611318	2.88574	3.67959	3.51001	0.0347332	3.54475	4.46992	4.28086	0.031689	4.31255	4.89779	4.70487	0.0425967	4.74747	6.03949	5.84769	0.0557033	5.9034	6.66193	6.48141	0.0655333	6.54694	7.10559	6.97322	0.07864	7.05186	7.40628	7.25376
1042.8	0.2617	0.40309	0.46957	0.53963	0.57717	0.66619	0.71417	0.74662	0.77073	0.80112	0.83657	0.88004			1142.9	1.65044				3.02901	2.8925	0.00639326	2.89889	3.69488	3.5271	0.0357112	3.56281	4.49159	4.3034	0.0326388	4.33604	4.9204	4.73059	0.0437565	4.77435	6.07016	5.88316	0.05722	5.94038	6.6973	6.52331	0.0673176	6.59063	7.14825	7.01969	0.0807812	7.10047	7.4559	7.30501
1043.5	0.26626	0.41191	0.47929	0.5522	0.59115	0.68234	0.73164	0.76718	0.78977	0.82073	0.85467	0.8966			1143.6	1.6531				3.03669	2.90502	0.00668476	2.9117	3.70595	3.54377	0.0367122	3.58049	4.50402	4.32547	0.033613	4.35908	4.93969	4.75579	0.0449431	4.80073	6.09256	5.91802	0.0587717	5.9768	6.73132	6.56457	0.0691432	6.63371	7.1829	7.0655	0.0829718	7.14847	7.49549	7.35559
1044.2	0.26835	0.42238	0.48899	0.56416	0.60506	0.70081	0.7492	0.78307	0.80928	0.83907	0.87237	0.91264			1144.3	1.65615				3.04369	2.91719	0.00698806	2.92418	3.71535	3.56003	0.0377367	3.59777	4.51856	4.34704	0.0346119	4.38165	4.9545	4.78046	0.0461569	4.82661	6.11787	5.95226	0.0603591	6.01262	6.75772	6.60517	0.0710107	6.67619	7.2144	7.11061	0.0852128	7.19583	7.52835	7.4055
1044.9	0.27233	0.42806	0.49831	0.5769	0.61759	0.71351	0.76401	0.79965	0.82395	0.85349	0.88756	0.92704			1145	1.65844				3.05	2.929	0.00730357	2.9363	3.72306	3.57587	0.0387849	3.61465	4.53106	4.36811	0.0356361	4.40375	4.96821	4.80458	0.0473986	4.85198	6.13621	5.98587	0.0619828	6.04785	6.7811	6.64511	0.0729209	6.71803	7.24269	7.15502	0.0875051	7.24253	7.55962	7.45471
1045.6	0.27669	0.43631	0.50839	0.58966	0.63139	0.73047	0.78055	0.81546	0.84217	0.87217	0.90323	0.94515			1145.7	1.6638				3.06196	2.94045	0.0076317	2.94808	3.74111	3.59128	0.0398573	3.63113	4.55198	4.38867	0.0366861	4.42536	4.99229	4.82816	0.0486685	4.87683	6.1759	6.01883	0.0636434	6.08247	6.82339	6.68435	0.0748746	6.75922	7.2929	7.1987	0.0898495	7.28855	7.61377	7.5032
1046.3	0.27701	0.443	0.5188	0.60104	0.64328	0.74422	0.79781	0.83503	0.85961	0.88736	0.92257	0.96161			1146.4	1.66341				3.05985	2.95154	0.00797288	2.95951	3.73938	3.60625	0.0409543	3.6472	4.55093	4.40872	0.0377624	4.44648	4.99114	4.85118	0.0499671	4.90115	6.17732	6.05113	0.0653416	6.11647	6.82967	6.72289	0.0768725	6.79976	7.29962	7.24165	0.092247	7.3339	7.6243	7.55096
1047	0.28373	0.45562	0.52942	0.61532	0.65978	0.76401	0.81733	0.85526	0.88044	0.90845	0.94124	0.98243			1147.1	1.6684				3.0761	2.96226	0.00832754	2.97058	3.75664	3.62078	0.0420763	3.66286	4.5772	4.42825	0.0388655	4.46711	5.02111	4.87363	0.051295	4.92493	6.21727	6.08276	0.067078	6.14983	6.87543	6.76071	0.0789153	6.83963	7.3536	7.28384	0.0946984	7.37854	7.68245	7.59797
1047.7	0.28675	0.46398	0.5425	0.62777	0.67453	0.78289	0.83676	0.87357	0.90012	0.92619	0.95984	0.99862			1147.8	1.66917				3.07114	2.9726	0.00869612	2.98129	3.75319	3.63487	0.0432238	3.67809	4.57404	4.44724	0.0399958	4.48723	5.01765	4.89551	0.0526525	4.94816	6.21871	6.1137	0.0688533	6.18255	6.88018	6.7978	0.0810039	6.87881	7.36038	7.32525	0.0972046	7.42246	7.68953	7.64421
1048.4	0.2902	0.47337	0.5531	0.64284	0.68913	0.79965	0.85704	0.89372	0.9196	0.94624	0.97859	1.01578			1148.5	1.66994				3.08035	2.98256	0.00907909	2.99164	3.76704	3.6485	0.044397	3.6929	4.58987	4.46569	0.0411539	4.50684	5.03965	4.9168	0.0540403	4.97084	6.24741	6.14395	0.070668	6.21461	6.91512	6.83415	0.0831389	6.91729	7.39776	7.36588	0.0997666	7.46565	7.73393	7.68966
1049.1	0.29628	0.48062	0.56351	0.65645	0.70307	0.81583	0.87478	0.91285	0.94037	0.96538	0.99816	1.03562			1149.2	1.67186				3.0839	2.99214	0.00947691	3.00162	3.77485	3.66167	0.0455964	3.70727	4.60045	4.4836	0.0423404	4.52594	5.0501	4.93749	0.0554587	4.99295	6.26614	6.17348	0.0725229	6.24601	6.93905	6.86973	0.0853211	6.95505	7.42677	7.4057	0.102385	7.50809	7.76605	7.7343
1049.8	0.30019	0.48967	0.5761	0.67127	0.72061	0.83599	0.89516	0.93433	0.95852	0.9881	1.01883	1.0556			1149.9	1.67494				3.08887	3.00134	0.00989005	3.01123	3.78094	3.67439	0.0468225	3.72121	4.60999	4.50095	0.0435556	4.5445	5.06407	4.95758	0.0569083	5.01449	6.28492	6.2023	0.0744186	6.27672	6.96145	6.90454	0.0875513	6.99209	7.45247	7.44471	0.105062	7.54977	7.7983	7.77812
1050.5	0.30528	0.50084	0.58817	0.68549	0.73722	0.85585	0.91601	0.95543	0.9813	1.00925	1.03992	1.07424			1150.6	1.68035				3.1017	3.01014	0.010319	3.02046	3.79402	3.68663	0.0480756	3.7347	4.6302	4.51774	0.0448003	4.56254	5.08628	4.97707	0.0583897	5.03546	6.31393	6.23039	0.0763558	6.30674	7.00003	6.93856	0.0898303	7.02839	7.49722	7.48287	0.107796	7.59067	7.84513	7.82111
1051.2	0.30939	0.51086	0.60021	0.70129	0.75318	0.87297	0.93691	0.97589	1.00346	1.02967	1.06243	1.09648			1151.3	1.6819				3.10527	3.01855	0.0107643	3.02932	3.79927	3.6984	0.0493562	3.74775	4.63767	4.53396	0.0460747	4.58004	5.09448	4.99593	0.0599033	5.05583	6.3314	6.25773	0.078335	6.33606	7.02263	6.97178	0.0921589	7.06394	7.52315	7.52019	0.110591	7.63078	7.87227	7.86323
1051.9	0.31536	0.5242	0.61489	0.71912	0.77108	0.89681	0.96051	1.00115	1.02707	1.05609	1.08618	1.12176			1152	1.68306				3.10885	3.02657	0.0112264	3.03779	3.80627	3.70969	0.0506646	3.76035	4.64943	4.54961	0.0473796	4.59699	5.10858	5.01417	0.0614495	5.07562	6.35331	6.28432	0.0803571	6.36467	7.04855	7.00418	0.0945378	7.09872	7.55092	7.55665	0.113445	7.67009	7.90497	7.90449
1052.6	0.32285	0.53641	0.63081	0.73621	0.79013	0.92045	0.98537	1.02707	1.05366	1.08019	1.11173	1.14683			1152.7	1.68811				3.11961	3.03418	0.0117058	3.04589	3.82296	3.7205	0.0520012	3.7725	4.66659	4.56468	0.0487155	4.6134	5.13098	5.03178	0.0630291	5.09481	6.38263	6.31014	0.0824226	6.39256	7.08272	7.03576	0.0969678	7.13273	7.59277	7.59222	0.116361	7.70858	7.9506	7.94486
1053.3	0.32772	0.54601	0.64298	0.75284	0.80854	0.94081	1.00856	1.05269	1.0787	1.10561	1.1371	1.17409			1153.4	1.69083				3.12752	3.04139	0.0122032	3.05359	3.83266	3.73082	0.0533666	3.78419	4.67843	4.57916	0.0500828	4.62924	5.14636	5.04874	0.0646423	5.11339	6.40619	6.33519	0.0845323	6.41972	7.10886	7.0665	0.0994497	7.16595	7.62781	7.6269	0.11934	7.74624	7.99098	7.98432
1054	0.33366	0.55667	0.65811	0.7686	0.82832	0.96294	1.03039	1.07572	1.10281	1.1298	1.16198	1.19674			1154.1	1.69239				3.13329	3.04819	0.0127189	3.06091	3.83354	3.74065	0.054761	3.79541	4.68813	4.59305	0.0514821	4.64453	5.15585	5.06506	0.0662899	5.13135	6.42096	6.35946	0.0866868	6.44614	7.13017	7.09638	0.101984	7.19837	7.65244	7.66068	0.122381	7.78306	8.01678	8.02287
1054.7	0.33931	0.56781	0.67019	0.78578	0.8445	0.98424	1.05293	1.10027	1.12538	1.15398	1.18522	1.22039			1154.8	1.69395				3.1369	3.05459	0.0132537	3.06784	3.84326	3.74998	0.0561849	3.80617	4.69786	4.60634	0.052914	4.65926	5.16654	5.08073	0.0679722	5.1487	6.44169	6.38293	0.0888867	6.47181	7.15814	7.1254	0.104573	7.22998	7.68069	7.69353	0.125487	7.81902	8.05193	8.06048
1055.4	0.34602	0.5821	0.68596	0.80427	0.86477	1.00577	1.07895	1.12564	1.15372	1.18005	1.21255	1.24738			1155.5	1.69668				3.14123	3.06057	0.013808	3.07437	3.85212	3.75882	0.0576387	3.81646	4.70869	4.61903	0.0543791	4.67341	5.17845	5.09573	0.0696898	5.16542	6.46398	6.40559	0.0911329	6.49673	7.1829	7.15355	0.107215	7.26076	7.71259	7.72546	0.128658	7.85411	8.08537	8.09714
1056.1	0.3531	0.5932	0.70291	0.82054	0.88308	1.03062	1.10382	1.1508	1.17788	1.20698	1.23652	1.27174			1156.2	1.70098				3.15065	3.06613	0.0143824	3.08052	3.86278	3.76715	0.0591229	3.82627	4.72498	4.63111	0.0558777	4.68699	5.20116	5.11007	0.0714433	5.18152	6.49382	6.42745	0.0934259	6.52087	7.21938	7.1808	0.109913	7.29072	7.75532	7.75643	0.131895	7.88833	8.13205	8.13283
1056.8	0.35925	0.6059	0.71581	0.84004	0.90303	1.05342	1.12798	1.17571	1.2042	1.2331	1.2659	1.29957			1156.9	1.70137				3.15065	3.07128	0.0149775	3.08626	3.86278	3.77498	0.0606378	3.83562	4.72716	4.64257	0.0574106	4.69998	5.20116	5.12374	0.0732331	5.19697	6.49681	6.44848	0.0957664	6.54425	7.2277	7.20716	0.112666	7.31983	7.76784	7.78645	0.1352	7.92165	8.14704	8.16755
1057.5	0.3645	0.61631	0.7303	0.85763	0.92257	1.07647	1.15319	1.20226	1.23084	1.25951	1.29122	1.32526			1157.6	1.7053				3.16082	3.07601	0.0155939	3.09161	3.87704	3.78229	0.0621838	3.84448	4.74788	4.65342	0.0589783	4.7124	5.22637	5.13673	0.0750598	5.21179	6.53131	6.46868	0.0981552	6.56684	7.2711	7.23261	0.115477	7.34809	7.81448	7.8155	0.138572	7.95407	8.20163	8.20128
1058.2	0.37145	0.63009	0.74662	0.87478	0.94319	1.09901	1.17733	1.228	1.25806	1.28677	1.31704	1.35083			1158.3	1.70451				3.16301	3.08032	0.0162322	3.09655	3.87972	3.7891	0.0637613	3.85286	4.75226	4.66364	0.0605813	4.72422	5.23359	5.14904	0.076924	5.22596	6.54335	6.48804	0.100593	6.58864	7.28618	7.25714	0.118345	7.37549	7.8343	7.84356	0.142013	7.98558	8.22432	8.234
1058.9	0.37914	0.64106	0.7619	0.89228	0.96028	1.12279	1.20282	1.25372	1.28499	1.3116	1.34462	1.3788			1159	1.70962				3.17176	3.08421	0.0168931	3.1011	3.89314	3.79539	0.0653709	3.86076	4.7709	4.67324	0.0622202	4.73546	5.25291	5.16066	0.078826	5.23948	6.57052	6.50656	0.10308	6.60964	7.3215	7.28075	0.121271	7.40202	7.87227	7.87064	0.145525	8.01616	8.26799	8.2657
1059.6	0.383	0.65449	0.77553	0.90949	0.97904	1.1434	1.22574	1.27791	1.31009	1.33783	1.36804	1.40314			1159.7	1.70726				3.16884	3.08767	0.0175771	3.10525	3.88956	3.80116	0.0670127	3.86817	4.7665	4.6822	0.0638955	4.7461	5.25049	5.17158	0.0807666	5.25235	6.57355	6.52422	0.105618	6.62984	7.32487	7.30341	0.124256	7.42767	7.88134	7.8967	0.149108	8.04581	8.27942	8.29637
1060.3	0.38985	0.66328	0.78922	0.92534	0.99839	1.16627	1.24997	1.30227	1.33229	1.36239	1.39476	1.42758			1160.4	1.71041				3.17761	3.09071	0.018285	3.10899	3.90211	3.80641	0.0686874	3.87509	4.7841	4.69053	0.0656078	4.75614	5.26987	5.18181	0.0827461	5.26456	6.60237	6.54102	0.108206	6.64923	7.36377	7.32513	0.127302	7.45243	7.92319	7.92176	0.152762	8.07452	8.3253	8.326
1061	0.396	0.67717	0.8039	0.94602	1.01812	1.19179	1.27644	1.33199	1.36239	1.39284	1.42528	1.4568			1161.1	1.70608				3.17249	3.09332	0.0190173	3.11234	3.89583	3.81113	0.0703951	3.88153	4.77749	4.69822	0.0673578	4.76558	5.26502	5.19134	0.0847652	5.27611	6.60237	6.55695	0.110847	6.6678	7.36546	7.34589	0.130408	7.47629	7.93049	7.94578	0.15649	8.10227	8.33297	8.35457
1061.7	0.40542	0.69454	0.82433	0.96895	1.044	1.22039	1.30798	1.36301	1.39605	1.42626	1.45848	1.49108			1161.8	1.70805				3.17541	3.0955	0.0197747	3.11528	3.90032	3.81534	0.0721365	3.88747	4.783	4.70527	0.0691458	4.77442	5.2723	5.20016	0.0868243	5.28699	6.61607	6.57201	0.11354	6.68555	7.38414	7.36568	0.133576	7.49925	7.9506	7.96878	0.160291	8.12907	8.35988	8.38207
1062.4	0.414	0.70974	0.84256	0.99152	1.06832	1.2494	1.34029	1.39701	1.43087	1.46184	1.49142	1.52546			1162.5	1.70844				3.17468	3.09725	0.020558	3.11781	3.90122	3.81901	0.0739118	3.89293	4.78851	4.71168	0.0709726	4.78265	5.2808	5.20828	0.0889241	5.2972	6.62674	6.58619	0.116285	6.70247	7.39776	7.3845	0.136806	7.52131	7.96893	7.99073	0.164168	8.15489	8.38108	8.4085
1063.1	0.42141	0.72427	0.86238	1.01461	1.09396	1.27997	1.37341	1.42988	1.4642	1.49486	1.52862	1.56063			1163.2	1.70883				3.17834	3.09858	0.0213677	3.11994	3.90751	3.82216	0.0757214	3.89788	4.79513	4.71744	0.0728386	4.79027	5.28689	5.21568	0.0910649	5.30674	6.64355	6.59948	0.119085	6.71856	7.41822	7.40234	0.1401	7.54244	7.9965	8.01162	0.16812	8.17974	8.41201	8.43384
1063.8	0.42737	0.73875	0.87801	1.03514	1.11609	1.30677	1.40023	1.45881	1.49451	1.5244	1.55704	1.58964			1163.9	1.70687				3.17687	3.09947	0.0222045	3.12167	3.90571	3.82478	0.0775657	3.90235	4.79513	4.72254	0.0747444	4.79729	5.2881	5.22236	0.0932475	5.31561	6.64814	6.61187	0.121939	6.73381	7.42848	7.41919	0.143458	7.56265	8.0094	8.03145	0.172149	8.2036	8.42752	8.45807
1064.5	0.43381	0.75093	0.89146	1.05342	1.13397	1.3277	1.42233	1.48286	1.51775	1.54775	1.58234	1.6151			1164.6	1.70923				3.18053	3.09993	0.0230693	3.123	3.91021	3.82687	0.0794452	3.90632	4.80397	4.727	0.0766907	4.80369	5.29785	5.22833	0.0954722	5.3238	6.66653	6.62337	0.124848	6.74822	7.45075	7.43505	0.14688	7.58193	8.03341	8.05022	0.176256	8.22647	8.45863	8.4812
1065.2	0.44106	0.76313	0.90761	1.06832	1.15266	1.35114	1.4481	1.50973	1.54454	1.5758	1.60768	1.64059			1165.3	1.70726				3.17907	3.09996	0.0239626	3.12392	3.91201	3.82843	0.0813602	3.90979	4.80839	4.7308	0.0786779	4.80948	5.30396	5.23357	0.0977396	5.33131	6.67729	6.63397	0.127813	6.76178	7.46793	7.4499	0.150369	7.60027	8.05564	8.0679	0.180442	8.24834	8.48203	8.50321
1065.9	0.44875	0.77714	0.92321	1.09018	1.17517	1.37848	1.47741	1.53851	1.57543	1.60805	1.64097	1.67263			1166	1.7049				3.17834	3.09956	0.0248852	3.12445	3.91111	3.82946	0.083311	3.91277	4.80839	4.73395	0.0807066	4.81466	5.30518	5.2381	0.10005	5.33815	6.6819	6.64366	0.130835	6.7745	7.47309	7.46375	0.153924	7.61767	8.06678	8.0845	0.184708	8.26921	8.49767	8.52409
1066.6	0.45719	0.79104	0.94297	1.11276	1.19922	1.40799	1.50938	1.5729	1.60916	1.6421	1.67533	1.70569			1166.7	1.70687				3.18346	3.09873	0.0258379	3.12457	3.91922	3.82995	0.0852981	3.91525	4.81615	4.73644	0.0827774	4.81922	5.31496	5.2419	0.102405	5.3443	6.70039	6.65244	0.133914	6.78635	7.49894	7.47658	0.157546	7.63413	8.09655	8.10001	0.189055	8.28907	8.52904	8.54383
1067.3	0.46516	0.80854	0.96427	1.13606	1.22687	1.43913	1.5417	1.60805	1.64589	1.67919	1.7112	1.74622			1167.4	1.70569				3.18053	3.09747	0.0268213	3.12429	3.91381	3.82991	0.0873218	3.91723	4.81504	4.73828	0.0848909	4.82317	5.31496	5.24497	0.104804	5.34977	6.70039	6.66031	0.137051	6.79736	7.50585	7.48839	0.161236	7.64963	8.10588	8.11442	0.193483	8.3079	8.5428	8.56243
1068	0.47797	0.83196	0.99038	1.16923	1.25951	1.47911	1.58599	1.65348	1.69161	1.72504	1.7559	1.79061			1168.1	1.70451				3.182	3.09578	0.0278362	3.12361	3.91832	3.82934	0.0893825	3.91873	4.81948	4.73946	0.0870476	4.8265	5.32231	5.24731	0.107247	5.35456	6.71738	6.66725	0.140246	6.8075	7.52489	7.49918	0.164996	7.66418	8.13018	8.12773	0.197995	8.32572	8.57235	8.57988
1068.7	0.48854	0.85055	1.01414	1.19481	1.29033	1.5153	1.6263	1.69629	1.7342	1.76807	1.80177	1.83316			1168.8	1.70451				3.17907	3.09366	0.0288834	3.12254	3.91742	3.82824	0.0914805	3.91972	4.81837	4.73997	0.0892481	4.82922	5.32231	5.24893	0.109736	5.35866	6.72202	6.67328	0.143501	6.81678	7.53356	7.50894	0.168825	7.67777	8.14329	8.13992	0.20259	8.34251	8.58816	8.59617
1069.4	0.49716	0.86676	1.03514	1.22264	1.31917	1.54953	1.66303	1.7334	1.77378	1.80842	1.84162	1.87068			1169.5	1.70648				3.18273	3.09111	0.0299636	3.12107	3.92013	3.82661	0.0936162	3.92022	4.82614	4.73983	0.0914929	4.83132	5.33212	5.24981	0.112271	5.36208	6.74062	6.67838	0.146816	6.8252	7.55614	7.51767	0.172724	7.6904	8.17147	8.151	0.207269	8.35827	8.61589	8.61129
1070.1	0.50793	0.88695	1.05877	1.25026	1.34834	1.58526	1.70137	1.77296	1.81384	1.84884	1.88191	1.91337			1170.2	1.70177				3.17761	3.08813	0.0310776	3.11921	3.91562	3.82444	0.0957899	3.92023	4.81948	4.73903	0.0937826	4.83281	5.32353	5.24997	0.114852	5.36482	6.73597	6.68256	0.150191	6.83276	7.5544	7.52536	0.176695	7.70206	8.16959	8.16096	0.212035	8.373	8.62184	8.62524
1070.8	0.51976	0.90594	1.08044	1.27703	1.37816	1.62218	1.7402	1.81301	1.85481	1.8906	1.92309	1.95659			1170.9	1.70373				3.18346	3.08473	0.0322262	3.11696	3.92645	3.82175	0.0980021	3.91975	4.83504	4.73757	0.0961177	4.83369	5.34195	5.2494	0.11748	5.36688	6.76239	6.68582	0.153628	6.83944	7.58752	7.53202	0.180739	7.71276	8.20918	8.1698	0.216886	8.38669	8.66563	8.63801
1071.5	0.52687	0.92109	1.09825	1.29688	1.39991	1.64665	1.76767	1.84204	1.88625	1.92044	1.95569	1.98335			1171.6	1.70098				3.18053	3.0809	0.0334101	3.11431	3.92013	3.81852	0.100253	3.91877	4.8317	4.73546	0.0984988	4.83396	5.33703	5.24809	0.120156	5.36825	6.76083	6.68814	0.157127	6.84527	7.58752	7.53763	0.184855	7.72248	8.21107	8.17751	0.221826	8.39934	8.67162	8.6496
1072.2	0.5315	0.93068	1.10969	1.3128	1.41873	1.66763	1.78855	1.86638	1.91029	1.94626	1.97834	2.01187			1172.3	1.70137				3.1798	3.07665	0.0346301	3.11128	3.92013	3.81477	0.102543	3.91731	4.83281	4.73268	0.100926	4.83361	5.33949	5.24606	0.122879	5.36894	6.76862	6.68954	0.160688	6.85022	7.60151	7.5422	0.189045	7.73124	8.22811	8.18409	0.226853	8.41094	8.69161	8.66
1072.9	0.53864	0.94515	1.12798	1.33537	1.44112	1.69668	1.8218	1.89889	1.94357	1.97788	2.01372	2.04315			1173	1.70098				3.18127	3.07198	0.0358871	3.10787	3.92374	3.81049	0.104872	3.91536	4.83615	4.72925	0.103401	4.83266	5.34441	5.2433	0.125651	5.36895	6.77798	6.69	0.164313	6.85431	7.61553	7.54572	0.193309	7.73903	8.24708	8.18954	0.231971	8.42151	8.71365	8.6692
1073.6	0.54941	0.96339	1.15001	1.36207	1.46859	1.73021	1.85609	1.93553	1.98198	2.0179	2.05305	2.08401			1173.7	1.69512				3.17395	3.06689	0.0371817	3.10408	3.91562	3.80569	0.107241	3.91293	4.83059	4.72517	0.105923	4.83109	5.33703	5.23981	0.128471	5.36829	6.77485	6.68954	0.168001	6.85754	7.61202	7.54819	0.197648	7.74584	8.25087	8.19385	0.237178	8.43103	8.71565	8.67721
1074.3	0.55924	0.98311	1.17328	1.38931	1.50003	1.76522	1.89671	1.97834	2.02349	2.0611	2.09701	2.12373			1174.4	1.69395				3.17103	3.06139	0.0385149	3.0999	3.91111	3.80036	0.10965	3.91001	4.82614	4.72043	0.108494	4.82893	5.33703	5.2356	0.131342	5.36694	6.7733	6.68814	0.171754	6.85989	7.61904	7.54961	0.202064	7.75168	8.25848	8.19702	0.242477	8.4395	8.7277	8.68402
1075	0.56925	1.00184	1.19619	1.41482	1.52827	1.8026	1.93553	2.01883	2.06776	2.10572	2.13796	2.1687			1175.1	1.68888				3.16082	3.05546	0.0398874	3.09535	3.90211	3.79452	0.112099	3.90662	4.81504	4.71505	0.111113	4.82616	5.32353	5.23067	0.134262	5.36493	6.7655	6.68582	0.175573	6.86139	7.61027	7.54999	0.206556	7.75655	8.25277	8.19906	0.247867	8.44693	8.72569	8.68963
1075.7	0.58237	1.02424	1.22433	1.45011	1.56387	1.84502	1.98335	2.06681	2.11787	2.15675	2.1918	2.21922			1175.8	1.68733				3.15937	3.04913	0.0413	3.09043	3.90032	3.78816	0.114588	3.90275	4.81282	4.70901	0.113781	4.82279	5.32353	5.22501	0.137232	5.36224	6.76862	6.68256	0.179457	6.86202	7.61377	7.54931	0.211126	7.76044	8.26038	8.19995	0.253351	8.4533	8.73575	8.69403
1076.4	0.59484	1.04689	1.25343	1.48286	1.60288	1.8893	2.03002	2.1169	2.1682	2.20699	2.24182	2.27405			1176.5	1.68035				3.14775	3.04239	0.0427536	3.08514	3.88419	3.78128	0.117119	3.8984	4.79844	4.70233	0.116499	4.81883	5.30762	5.21863	0.140253	5.35888	6.75305	6.67838	0.183408	6.86179	7.60151	7.54759	0.215774	7.76336	8.24898	8.19971	0.258929	8.45864	8.72569	8.69722
1077.1	0.60618	1.06905	1.27879	1.51391	1.63682	1.92975	2.07396	2.16371	2.21615	2.25684	2.29298	2.32327			1177.2	1.67726				3.13906	3.03523	0.0442489	3.07948	3.87525	3.77389	0.11969	3.89358	4.7874	4.695	0.119267	4.81427	5.29785	5.21154	0.143326	5.35486	6.74217	6.67328	0.187426	6.86071	7.59277	7.54482	0.220501	7.76532	8.24138	8.19833	0.264601	8.46293	8.72168	8.69921
1077.8	0.61702	1.08668	1.30137	1.54135	1.66533	1.96562	2.11252	2.20546	2.25788	2.30038	2.33561	2.36537			1177.9	1.66994				3.12896	3.02768	0.0457868	3.07347	3.86634	3.76599	0.122303	3.8883	4.77859	4.68704	0.122086	4.80913	5.28567	5.20373	0.14645	5.35018	6.73597	6.66725	0.191512	6.85877	7.58578	7.541	0.225308	7.76631	8.23569	8.1958	0.270369	8.46617	8.71766	8.69999
1078.5	0.62748	1.10841	1.32526	1.57	1.69707	2.00447	2.15427	2.24957	2.30409	2.34369	2.38177	2.40991			1178.6	1.66456				3.1232	3.01972	0.047368	3.06709	3.85567	3.75759	0.124958	3.88255	4.76431	4.67844	0.124956	4.80339	5.27351	5.19521	0.149627	5.34483	6.72048	6.66031	0.195666	6.85597	7.57705	7.53613	0.230195	7.76633	8.23	8.19214	0.276234	8.46837	8.71365	8.69956
1079.2	0.63988	1.13006	1.35176	1.60029	1.72982	2.04409	2.19837	2.29351	2.34963	2.39056	2.42941	2.45867			1179.3	1.65806				3.11172	3.01137	0.0489934	3.06036	3.84326	3.74868	0.127654	3.87634	4.75335	4.6692	0.127878	4.79708	5.26381	5.18598	0.152856	5.33884	6.70965	6.65244	0.199888	6.85233	7.56659	7.53022	0.235163	7.76539	8.22243	8.18734	0.282196	8.46954	8.71164	8.69791
1079.9	0.64849	1.14525	1.3712	1.62405	1.75711	2.07683	2.23152	2.32863	2.38726	2.42996	2.46831	2.50035			1180	1.65348				3.09956	3.00262	0.0506638	3.05328	3.83354	3.73928	0.130393	3.86967	4.74024	4.65934	0.130852	4.79019	5.24928	5.17605	0.156138	5.33219	6.6973	6.64366	0.204181	6.84784	7.5544	7.52327	0.240213	7.76349	8.20918	8.18141	0.288255	8.46967	8.70162	8.69506
1080.6	0.65599	1.16145	1.38899	1.64702	1.78074	2.10572	2.26412	2.36374	2.42214	2.46831	2.50669	2.5363			1180.7	1.64702				3.0903	2.99348	0.0523801	3.04586	3.81944	3.72937	0.133174	3.86255	4.72607	4.64885	0.133878	4.78272	5.23239	5.16543	0.159474	5.3249	6.68036	6.63397	0.208543	6.84251	7.53876	7.51528	0.245345	7.76063	8.19596	8.17435	0.294414	8.46876	8.69161	8.69101
1081.3	0.66619	1.17788	1.41059	1.67302	1.80884	2.13845	2.29932	2.40326	2.46207	2.50553	2.54507	2.57513			1181.4	1.64135				3.08177	2.98395	0.0541429	3.0381	3.81154	3.71898	0.135997	3.85498	4.71411	4.63773	0.136958	4.77469	5.22276	5.1541	0.162864	5.31697	6.67268	6.62337	0.212977	6.83635	7.53182	7.50626	0.250561	7.75682	8.1903	8.16615	0.300673	8.46682	8.6856	8.68575
1082	0.6792	1.20005	1.43714	1.7049	1.84332	2.18072	2.34477	2.45188	2.51131	2.55859	2.59657	2.62664			1182.1	1.63343				3.06761	2.97405	0.0559532	3.03	3.7949	3.70811	0.138863	3.84697	4.69678	4.62601	0.140091	4.7661	5.20595	5.14209	0.166309	5.3084	6.6512	6.61187	0.217481	6.82935	7.51104	7.4962	0.25586	7.75206	8.17523	8.15683	0.307032	8.46386	8.67162	8.67928
1082.7	0.69263	1.22631	1.46859	1.74181	1.88495	2.22998	2.40104	2.50842	2.5704	2.61818	2.65828	2.68844			1182.8	1.6293				3.06267	2.96376	0.0578117	3.02157	3.78791	3.69675	0.141772	3.83852	4.69029	4.61367	0.143278	4.75694	5.19876	5.12939	0.169808	5.2992	6.64661	6.59948	0.222057	6.82153	7.51104	7.48512	0.261243	7.74637	8.17523	8.14639	0.313492	8.45988	8.66962	8.67161
1083.4	0.70876	1.25603	1.50522	1.78608	1.93063	2.2877	2.46037	2.56921	2.63512	2.68534	2.72709	2.7574			1183.5	1.6263				3.05703	2.95309	0.0597193	3.01281	3.78094	3.68491	0.144724	3.82963	4.68382	4.60072	0.14652	4.74724	5.19159	5.11601	0.173363	5.28938	6.64049	6.58619	0.226705	6.81289	7.50758	7.47302	0.266712	7.73973	8.17523	8.13483	0.320054	8.45489	8.67561	8.66275
1084.1	0.72078	1.27673	1.53003	1.81719	1.96426	2.32541	2.50496	2.61698	2.68164	2.73338	2.77588	2.80737			1184.2	1.62181				3.04789	2.94206	0.0616766	3.00374	3.76964	3.6726	0.147719	3.82032	4.67305	4.58717	0.149816	4.73699	5.17726	5.10196	0.176973	5.27893	6.63132	6.57201	0.231426	6.80344	7.49376	7.45989	0.272266	7.73216	8.16394	8.12216	0.32672	8.44888	8.66563	8.65269
1084.8	0.72812	1.28973	1.54597	1.83527	1.98701	2.35342	2.53454	2.64789	2.71519	2.76885	2.80867	2.83988			1184.9	1.61808				3.04159	2.93066	0.0636846	2.99434	3.76357	3.65982	0.150758	3.81058	4.66552	4.57303	0.153168	4.7262	5.17011	5.08724	0.180639	5.26788	6.62369	6.55695	0.236221	6.79317	7.49204	7.44576	0.277907	7.72367	8.16582	8.10838	0.333488	8.44187	8.66962	8.64144
1085.5	0.73672	1.30647	1.56639	1.85994	2.01233	2.38616	2.56744	2.68411	2.75359	2.80737	2.84971	2.87674			1185.6	1.61102				3.03249	2.9189	0.065744	2.98464	3.75405	3.64658	0.15384	3.80042	4.65372	4.55829	0.156575	4.71487	5.1606	5.07186	0.184362	5.25622	6.61455	6.54102	0.241089	6.78211	7.48686	7.43062	0.283634	7.71425	8.16018	8.0935	0.340361	8.43386	8.66563	8.62901
1086.2	0.74559	1.32495	1.58782	1.88712	2.04315	2.4227	2.60795	2.72898	2.79769	2.85036	2.89468	2.92685			1186.3	1.61065				3.0297	2.90678	0.0678555	2.97463	3.75059	3.63288	0.156966	3.78985	4.6505	4.54298	0.160039	4.70301	5.15941	5.05582	0.188142	5.24396	6.61607	6.52422	0.246031	6.77025	7.48859	7.41448	0.289449	7.70393	8.1677	8.07752	0.347338	8.42486	8.67561	8.6154
1086.9	0.76015	1.35145	1.62144	1.92531	2.08401	2.47172	2.66379	2.78356	2.85496	2.90938	2.95325	2.98745			1187	1.60583				3.02482	2.89431	0.0700199	2.96433	3.74369	3.61873	0.160135	3.77887	4.64622	4.52708	0.163558	4.69064	5.1511	5.03913	0.191978	5.2311	6.6115	6.50656	0.251048	6.75761	7.48859	7.39734	0.295351	7.69269	8.16582	8.06046	0.354421	8.41488	8.67961	8.60061
1087.6	0.77411	1.37562	1.65044	1.96065	2.12324	2.51652	2.71206	2.83727	2.90938	2.96551	3.01301	3.0486			1187.7	1.60214				3.01787	2.88149	0.0722381	2.95373	3.73594	3.60414	0.163349	3.76749	4.63554	4.51061	0.167135	4.67775	5.14399	5.02179	0.195872	5.21767	6.60237	6.48804	0.256141	6.74418	7.47997	7.37922	0.301342	7.68056	8.16206	8.04231	0.36161	8.40392	8.67761	8.58465
1088.3	0.78361	1.39444	1.67225	1.98838	2.15328	2.55505	2.75613	2.88138	2.95597	3.0137	3.05985	3.09528			1188.4	1.60177				3.01648	2.86833	0.0745106	2.94284	3.7368	3.5891	0.166606	3.75571	4.63981	4.49358	0.170769	4.66435	5.14754	5.00382	0.199824	5.20365	6.6115	6.46868	0.261309	6.72999	7.49549	7.36012	0.307422	7.66754	8.18276	8.02308	0.368906	8.39199	8.69961	8.56754
1089	0.7936	1.41026	1.69278	2.01187	2.17821	2.58702	2.78997	2.91676	2.99502	3.05422	3.10027	3.13184			1189.1	1.60029				3.01439	2.85483	0.0768383	2.93167	3.73078	3.57363	0.169907	3.74354	4.63447	4.47599	0.17446	4.65045	5.14162	4.98523	0.203834	5.18906	6.60846	6.44848	0.266552	6.71503	7.49204	7.34005	0.313591	7.65364	8.18088	8.0028	0.376309	8.3791	8.70362	8.54927
1089.7	0.80279	1.42659	1.71277	2.03845	2.20699	2.6212	2.82748	2.95869	3.03739	3.09742	3.14413	3.17761			1189.8	1.59588				3.00469	2.841	0.0792219	2.92023	3.72563	3.55774	0.173253	3.73099	4.62488	4.45785	0.178209	4.63606	5.13452	4.96601	0.207903	5.17391	6.60237	6.42745	0.271873	6.69932	7.48859	7.31902	0.31985	7.63887	8.18276	7.98145	0.38382	8.36527	8.70563	8.52985
1090.4	0.81489	1.45011	1.7402	2.07396	2.24543	2.66686	2.87541	3.01162	3.08887	3.1521	3.1989	3.23445			1190.5	1.59588				3.00469	2.82685	0.081662	2.90851	3.72477	3.54142	0.176642	3.71806	4.62488	4.43916	0.182016	4.62118	5.1357	4.94618	0.21203	5.15821	6.60693	6.40559	0.27727	6.68286	7.49722	7.29703	0.3262	7.62323	8.19219	7.95905	0.39144	8.35049	8.71766	8.50929
1091.1	0.82699	1.47197	1.76807	2.10426	2.27982	2.71019	2.92348	3.06126	3.13979	3.20627	3.25687	3.29003			1191.2	1.59074				2.99778	2.81237	0.0841594	2.89653	3.71621	3.52468	0.180075	3.70476	4.61636	4.41994	0.185881	4.60582	5.12743	4.92574	0.216216	5.14195	6.60085	6.38293	0.282744	6.66567	7.49204	7.2741	0.33264	7.60674	8.18842	7.93561	0.399168	8.33478	8.71766	8.4876
1091.8	0.8383	1.49245	1.79308	2.13354	2.31153	2.74726	2.96688	3.10456	3.18933	3.25087	3.3037	3.34118			1191.9	1.58489				2.98676	2.79758	0.0867147	2.8843	3.70339	3.50754	0.183553	3.69109	4.60257	4.40019	0.189805	4.59	5.10975	4.9047	0.220462	5.12516	6.58112	6.35946	0.288296	6.64775	7.47309	7.25023	0.339172	7.5894	8.17335	7.91114	0.407006	8.31815	8.70162	8.46479
1092.5	0.85212	1.51775	1.82264	2.1702	2.35505	2.79898	3.02065	3.16446	3.24863	3.31436	3.36589	3.40251			1192.6	1.57834				2.97646	2.78249	0.0893286	2.87181	3.68893	3.49	0.187074	3.67707	4.58458	4.37992	0.193788	4.57371	5.09331	4.88308	0.224767	5.10784	6.55994	6.33519	0.293926	6.62912	7.45075	7.22544	0.345795	7.57123	8.15455	7.88566	0.414954	8.30061	8.6836	8.44087
1093.2	0.86477	1.54383	1.85567	2.21004	2.39552	2.84905	3.07751	3.22255	3.31207	3.37598	3.42768	3.46737			1193.3	1.57181				2.9621	2.76708	0.0920017	2.85909	3.67451	3.47206	0.19064	3.6627	4.56983	4.35914	0.19783	4.55697	5.07341	4.86087	0.229132	5.09	6.54184	6.31014	0.299634	6.60977	7.43533	7.19972	0.35251	7.55223	8.13767	7.85916	0.423012	8.28217	8.66762	8.41585
1093.9	0.877	1.56459	1.88018	2.24078	2.42941	2.89135	3.1232	3.2719	3.36279	3.43005	3.48337	3.5229			1194	1.56639				2.95121	2.75139	0.0947347	2.84612	3.65847	3.45373	0.194249	3.64798	4.55093	4.33785	0.201931	4.53978	5.05359	4.8381	0.233557	5.07165	6.52079	6.28432	0.30542	6.58974	7.4131	7.17311	0.359318	7.53243	8.11708	7.83166	0.431181	8.26284	8.6457	8.38973
1094.6	0.889	1.58855	1.91117	2.27667	2.46661	2.93765	3.17468	3.3243	3.41822	3.48819	3.54324	3.58261			1194.7	1.55632				2.93697	2.73539	0.0975281	2.83292	3.6425	3.43502	0.197903	3.63292	4.53002	4.31607	0.206092	4.52216	5.03385	4.81476	0.238042	5.0528	6.49531	6.25773	0.311285	6.56901	7.38754	7.1456	0.366218	7.51181	8.09096	7.80317	0.439461	8.24263	8.62184	8.36254
1095.3	0.90116	1.60916	1.93464	2.30515	2.49862	2.97715	3.21736	3.37365	3.46577	3.53916	3.59418	3.63329			1195.4	1.5481				2.92146	2.71912	0.100383	2.8195	3.62326	3.41594	0.2016	3.61754	4.51024	4.2938	0.210313	4.50411	5.01072	4.79086	0.242587	5.03345	6.46994	6.23039	0.317229	6.54761	7.36207	7.1172	0.373211	7.49041	8.06492	7.7737	0.447853	8.22156	8.59607	8.33427
1096	0.91411	1.6338	1.96653	2.33938	2.53805	3.02691	3.27115	3.42926	3.52533	3.59915	3.65426	3.69488			1196.1	1.53957				2.90536	2.70256	0.103299	2.80586	3.60247	3.39649	0.205341	3.60183	4.48436	4.27105	0.214594	4.48564	4.98655	4.76643	0.247193	5.01362	6.44318	6.2023	0.323253	6.52555	7.33162	7.08793	0.380297	7.46823	8.03341	7.74327	0.456357	8.19963	8.56643	8.30494
1096.7	0.93411	1.6684	2.00632	2.39276	2.59777	3.09813	3.34811	3.51318	3.60745	3.68299	3.74197	3.78268			1196.8	1.53109				2.89135	2.68574	0.106277	2.79201	3.58757	3.37668	0.209125	3.58581	4.46786	4.24783	0.218935	4.46676	4.96478	4.74146	0.25186	4.99332	6.41653	6.17348	0.329356	6.50284	7.30298	7.0578	0.387477	7.44528	8.00571	7.71189	0.464973	8.17686	8.54083	8.27457
1097.4	0.94493	1.692	2.03657	2.42941	2.6333	3.1434	3.40173	3.56615	3.66691	3.74369	3.80365	3.84946			1197.5	1.52195				2.87276	2.66864	0.109317	2.77796	3.56369	3.35653	0.212953	3.56948	4.43711	4.22415	0.223336	4.44748	4.93287	4.71596	0.256588	4.97255	6.38117	6.14395	0.335538	6.47948	7.26608	7.02682	0.394751	7.42158	7.9671	7.67957	0.473701	8.15327	8.50354	8.24316
1098.1	0.95565	1.71277	2.06348	2.4615	2.6687	3.1864	3.44905	3.61743	3.71792	3.79839	3.85745	3.90481			1198.2	1.51252				2.85496	2.65129	0.112421	2.76371	3.54487	3.33603	0.216825	3.55285	4.41672	4.20002	0.227798	4.42781	4.90908	4.68995	0.261377	4.95133	6.35331	6.1137	0.3418	6.4555	7.23936	6.99501	0.402118	7.39713	7.93963	7.64631	0.482542	8.12886	8.47423	8.21073
1098.8	0.97118	1.7398	2.09315	2.49977	2.70894	3.23519	3.50187	3.67451	3.78007	3.861	3.92103	3.96643			1198.9	1.50453				2.84119	2.63369	0.115589	2.74927	3.52939	3.31519	0.220739	3.53593	4.3944	4.17544	0.232319	4.40776	4.88652	4.66343	0.266227	4.92966	6.32703	6.08276	0.348143	6.4309	7.21107	6.96237	0.40958	7.37195	7.91225	7.61215	0.491496	8.10364	8.44695	8.17729
1099.5	0.98356	1.75954	2.11934	2.52813	2.74473	3.27718	3.54895	3.72649	3.83089	3.91471	3.97558	4.02254			1199.6	1.49624				2.82293	2.61583	0.11882	2.73465	3.5051	3.29402	0.224696	3.51872	4.36918	4.15043	0.236902	4.38733	4.85959	4.63642	0.271138	4.90756	6.29506	6.05113	0.354565	6.40569	7.17794	6.92892	0.417136	7.34606	7.8759	7.57708	0.500563	8.07764	8.41201	8.14285
1100.2	0.99655	1.78608	2.1503	2.56626	2.78484	3.33043	3.60662	3.7853	3.89314	3.97649	4.0411	4.0879			1200.3	1.48594				2.80673	2.59774	0.122115	2.71985	3.48498	3.27254	0.228697	3.50124	4.3431	4.125	0.241545	4.36654	4.83059	4.60893	0.276111	4.88504	6.25749	6.01883	0.361068	6.3799	7.14003	6.89468	0.424786	7.31946	7.8361	7.54113	0.509743	8.05087	8.36951	8.10743
1100.9	1.01088	1.81426	2.18474	2.60916	2.83139	3.3861	3.6686	3.85035	3.96278	4.04669	4.11244	4.16102			1201	1.47707				2.79126	2.57941	0.125476	2.70489	3.46418	3.25074	0.232739	3.48348	4.32215	4.09915	0.246248	4.3454	4.80507	4.58096	0.281145	4.8621	6.23161	5.98587	0.367651	6.35352	7.10886	6.85964	0.43253	7.29217	7.80728	7.5043	0.519036	8.02334	8.34065	8.07105
1101.6	1.02494	1.83865	2.21615	2.64606	2.87409	3.43558	3.72306	3.91021	4.02532	4.11055	4.1783	4.22669			1201.7	1.47028				2.77843	2.56086	0.128901	2.68976	3.45223	3.22864	0.236824	3.46547	4.30328	4.0729	0.251013	4.32392	4.78961	4.55253	0.28624	4.83877	6.21155	5.95226	0.374314	6.32658	7.08925	6.82384	0.44037	7.26421	7.78753	7.46662	0.528443	7.99506	8.32147	8.03371
1102.3	1.03538	1.85866	2.23872	2.67485	2.90135	3.47376	3.76444	3.9564	4.0738	4.16294	4.22961	4.28154			1202.4	1.46352				2.76312	2.54209	0.132392	2.67448	3.43479	3.20625	0.240951	3.4472	4.28154	4.04626	0.255837	4.3021	4.76541	4.52364	0.291397	4.81504	6.18159	5.91802	0.381058	6.29908	7.05992	6.78728	0.448303	7.23559	7.7589	7.42809	0.537964	7.96605	8.29469	7.99543
1103	1.05099	1.88538	2.27196	2.71394	2.94849	3.52939	3.82648	4.01976	4.13809	4.23156	4.30031	4.35111			1203.1	1.45479				2.74916	2.5231	0.135948	2.65905	3.41586	3.18357	0.245119	3.42868	4.26089	4.01923	0.260723	4.27995	4.74351	4.49432	0.296616	4.79093	6.16027	5.88316	0.387882	6.27104	7.03558	6.74998	0.456332	7.20631	7.73215	7.38873	0.547598	7.93633	8.26799	7.95623
1103.7	1.0639	1.91029	2.30356	2.75296	2.9902	3.58014	3.8815	4.07943	4.20243	4.29438	4.36415	4.41672			1203.8	1.44944				2.73716	2.50391	0.139571	2.64348	3.40251	3.1606	0.249329	3.40993	4.24229	3.99182	0.265668	4.25749	4.72498	4.46456	0.301895	4.76645	6.13621	5.84769	0.394786	6.24248	7.01294	6.71195	0.464454	7.17641	7.70903	7.34857	0.557345	7.90591	8.24328	7.91612
1104.4	1.07473	1.93375	2.3297	2.78548	3.02622	3.62744	3.93188	4.13523	4.25598	4.35311	4.42486	4.4792			1204.5	1.44012				2.72396	2.48451	0.143259	2.62777	3.38376	3.13737	0.253579	3.39095	4.22182	3.96406	0.270675	4.23473	4.70111	4.43438	0.307237	4.74162	6.10942	5.81163	0.401771	6.2134	6.98072	6.67321	0.472672	7.14588	7.67715	7.3076	0.567206	7.87481	8.21486	7.87511
1105.1	1.08643	1.95119	2.35396	2.81514	3.05844	3.66606	3.97741	4.18312	4.30725	4.40555	4.48023	4.53315			1205.2	1.43318				2.70957	2.46493	0.147014	2.61194	3.36822	3.11388	0.257871	3.37175	4.20146	3.93593	0.275741	4.21168	4.67843	4.4038	0.312639	4.71644	6.08415	5.77499	0.408836	6.18382	6.95505	6.63377	0.480984	7.11475	7.64892	7.26585	0.57718	7.84303	8.18653	7.83323
1105.8	1.09749	1.97151	2.38013	2.84643	3.09101	3.70681	4.02254	4.22863	4.35612	4.45964	4.53002	4.58775			1205.9	1.42626				2.69588	2.44516	0.150834	2.59599	3.3512	3.09013	0.262202	3.35233	4.18119	3.90747	0.280868	4.18834	4.65801	4.37282	0.318103	4.69092	6.05899	5.73778	0.415981	6.15376	6.92787	6.59364	0.48939	7.08303	7.6243	7.22334	0.587268	7.8106	8.16018	7.79049
1106.5	1.11045	1.99618	2.40991	2.88005	3.13184	3.75837	4.07943	4.29042	4.42181	4.52272	4.59833	4.65586			1206.6	1.41873				2.6804	2.42521	0.154722	2.57993	3.33426	3.06614	0.266573	3.33271	4.16198	3.87867	0.286054	4.16472	4.63234	4.34145	0.323628	4.66508	6.03115	5.70001	0.423206	6.12322	6.89922	6.55285	0.49789	7.05074	7.59277	7.18007	0.597468	7.77754	8.13205	7.74691
1107.2	1.12564	2.02722	2.44456	2.9255	3.18053	3.81768	4.14381	4.35913	4.49366	4.59939	4.6752	4.73369			1207.3	1.40767				2.66379	2.40509	0.158675	2.56377	3.3136	3.04191	0.270984	3.31289	4.13809	3.84955	0.291301	4.14085	4.60787	4.30971	0.329215	4.63892	5.99791	5.66171	0.430512	6.09222	6.86436	6.5114	0.506484	7.01789	7.55788	7.13608	0.607781	7.74386	8.09282	7.7025
1107.9	1.13632	2.04786	2.46831	2.95801	3.21366	3.85834	4.1889	4.40961	4.54674	4.65157	4.73042	4.79071			1208	1.4012				2.64911	2.38481	0.162695	2.5475	3.2961	3.01745	0.275434	3.29288	4.11718	3.82011	0.296607	4.11672	4.58458	4.27761	0.334862	4.61247	5.97448	5.62289	0.437896	6.06078	6.83754	6.46932	0.515172	6.98449	7.52835	7.09136	0.618207	7.70957	8.06492	7.65727
1108.6	1.1434	2.06205	2.48714	2.97852	3.23817	3.89045	4.22669	4.45041	4.58775	4.69462	4.77529	4.83504			1208.7	1.39091				2.62966	2.36436	0.166782	2.53114	3.27039	2.99277	0.279922	3.27269	4.0879	3.79038	0.301972	4.09235	4.55302	4.24515	0.34057	4.58572	5.93198	5.58355	0.445361	6.02891	6.7936	6.42661	0.523954	6.95057	7.47997	7.04595	0.628744	7.67469	8.01678	7.61126
1109.3	1.15744	2.08641	2.51826	3.01717	3.2802	3.94003	4.28154	4.50713	4.64836	4.76102	4.84061	4.90117			1209.4	1.38166				2.61096	2.34377	0.170934	2.5147	3.24863	2.96788	0.284449	3.25233	4.05976	3.76035	0.307397	4.06775	4.52272	4.21236	0.346338	4.5587	5.89522	5.54372	0.452904	5.99662	6.7515	6.3833	0.532828	6.91613	7.44218	6.99986	0.639394	7.63925	7.97444	7.56447
1110	1.16762	2.10378	2.54039	3.04369	3.30902	3.97649	4.32414	4.55617	4.69786	4.8095	4.89328	4.95336			1210.1	1.3693				2.58941	2.32303	0.175153	2.49819	3.22181	2.94279	0.289012	3.2318	4.02439	3.73004	0.31288	4.04292	4.48642	4.17924	0.352167	4.5314	5.85059	5.50341	0.460526	5.96393	6.70656	6.3394	0.541796	6.8812	7.38754	6.9531	0.650155	7.60325	7.92319	7.51693
1110.7	1.17951	2.1252	2.56626	3.07751	3.3458	4.02532	4.37421	4.60787	4.75664	4.86855	4.95336	5.01649			1210.8	1.35863				2.5704	2.30216	0.179438	2.4816	3.19742	2.91751	0.293613	3.21112	3.99669	3.69946	0.318422	4.01788	4.45451	4.1458	0.358056	4.50385	5.813	5.46263	0.468228	5.93085	6.66193	6.29493	0.550856	6.84578	7.34176	6.90569	0.661027	7.56672	7.87227	7.46864
1111.4	1.19179	2.14981	2.59537	3.11172	3.38376	4.07099	4.42792	4.66552	4.81282	4.9272	5.01418	5.08159			1211.5	1.34803				2.55035	2.28116	0.183789	2.46494	3.17468	2.89204	0.29825	3.19029	3.96735	3.66862	0.324022	3.99265	4.42283	4.11206	0.364005	4.47606	5.77298	5.4214	0.476007	5.8974	6.61759	6.2499	0.560008	6.80991	7.29625	6.85765	0.67201	7.52966	7.82708	7.41963
1112.1	1.20504	2.1757	2.62724	3.15137	3.42847	4.12762	4.49055	4.73151	4.88315	5.00035	5.08862	5.15585			1212.2	1.33721				2.53105	2.26003	0.188205	2.44823	3.15283	2.8664	0.302924	3.16932	3.94003	3.63754	0.32968	3.96722	4.39137	4.07802	0.370014	4.44804	5.7306	5.37973	0.483864	5.86359	6.57658	6.20433	0.569252	6.77358	7.25103	6.809	0.683103	7.4921	7.78037	7.36992
1112.8	1.21479	2.19432	2.65216	3.1798	3.46099	4.16869	4.53524	4.77969	4.93628	5.05592	5.14162	5.21435			1212.9	1.33015				2.51536	2.23879	0.192686	2.43147	3.1304	2.84058	0.307632	3.14821	3.91291	3.60621	0.335395	3.94161	4.36415	4.04371	0.376082	4.41979	5.69377	5.33764	0.491799	5.82944	6.53732	6.15823	0.578588	6.73682	7.21274	6.75976	0.694305	7.45406	7.74105	7.31953
1113.5	1.22857	2.21718	2.67917	3.21588	3.49865	4.21599	4.58775	4.83393	4.99344	5.11564	5.20835	5.27959			1213.6	1.32008				2.49632	2.21744	0.197232	2.41467	3.10885	2.81461	0.312375	3.12699	3.88776	3.57466	0.341167	3.91583	4.33411	4.00912	0.382209	4.39133	5.65718	5.29515	0.499812	5.79496	6.4998	6.11163	0.588014	6.69964	7.17133	6.70994	0.705616	7.41555	7.69839	7.26847
1114.2	1.24137	2.24233	2.71019	3.25462	3.53916	4.26678	4.64515	4.89553	5.05825	5.18203	5.27473	5.34441			1214.3	1.30948				2.48028	2.19599	0.201842	2.39783	3.08816	2.78849	0.317152	3.10564	3.86189	3.54289	0.346996	3.88989	4.30725	3.97428	0.388395	4.36268	5.62341	5.25226	0.507901	5.76016	6.46249	6.06454	0.59753	6.66207	7.13346	6.65955	0.717036	7.37659	7.65773	7.21676
1114.9	1.25372	2.26464	2.73716	3.287	3.57767	4.3142	4.69894	4.95678	5.12153	5.24807	5.34072	5.41253			1215	1.30377				2.46547	2.17444	0.206516	2.38096	3.0669	2.76223	0.321962	3.08419	3.83972	3.51092	0.35288	3.8638	4.27957	3.9392	0.394638	4.33384	5.59371	5.20899	0.516066	5.72506	6.42836	6.01697	0.607136	6.62411	7.09578	6.60863	0.728563	7.3372	7.61904	7.16442
1115.6	1.26241	2.28087	2.75931	3.31284	3.6033	4.35211	4.73915	4.99919	5.16654	5.29663	5.3889	5.46638			1215.7	1.293				2.44625	2.15281	0.211253	2.36406	3.04789	2.73583	0.326805	3.06264	3.81329	3.47875	0.358821	3.83757	4.25305	3.90388	0.40094	4.30482	5.55904	5.16537	0.524306	5.68967	6.39146	5.96895	0.616831	6.58578	7.05667	6.55719	0.740197	7.29739	7.58054	7.11148
1116.3	1.27174	2.29932	2.78227	3.34118	3.6358	4.39137	4.7841	5.04661	5.22035	5.34811	5.44252	5.52077			1216.4	1.28529				2.43332	2.13109	0.216053	2.34714	3.0304	2.70931	0.331679	3.04099	3.79315	3.4464	0.364816	3.81121	4.22766	3.86834	0.407299	4.27564	5.52968	5.12139	0.532622	5.65402	6.3577	5.92049	0.626615	6.5471	7.02263	6.50524	0.751937	7.25718	7.54397	7.05794
1117	1.28056	2.31793	2.8035	3.36744	3.66691	4.432	4.82614	5.09683	5.26987	5.40132	5.49794	5.57699			1217.1	1.27644				2.41713	2.1093	0.220915	2.33022	3.00677	2.68268	0.336585	3.01926	3.76357	3.41387	0.370865	3.78474	4.19952	3.83259	0.413716	4.24631	5.49288	5.07709	0.541013	5.6181	6.3183	5.8716	0.636486	6.50809	6.98072	6.45281	0.763783	7.2166	7.5024	7.00384
1117.7	1.29271	2.33722	2.82748	3.39703	3.70084	4.47301	4.87528	5.14873	5.32353	5.45632	5.55648	5.63767			1217.8	1.26707				2.39773	2.08745	0.225839	2.31328	2.98882	2.65593	0.341521	2.99745	3.74024	3.38118	0.376968	3.75815	4.16965	3.79665	0.420189	4.21684	5.46009	5.03247	0.549477	5.58195	6.28058	5.82231	0.646444	6.46875	6.94065	6.39991	0.775733	7.17565	7.46105	6.94918
1118.4	1.29658	2.34639	2.83923	3.41271	3.71792	4.49469	4.90117	5.17726	5.35303	5.49161	5.59114	5.67153			1218.5	1.26038				2.38616	2.06553	0.230823	2.29635	2.97235	2.62909	0.346487	2.97558	3.7222	3.34834	0.383125	3.73146	4.1505	3.76052	0.426717	4.18723	5.43626	4.98755	0.558015	5.54556	6.25317	5.77263	0.656488	6.42912	6.91353	6.34656	0.787786	7.13435	7.43019	6.89399
1119.1	1.30407	2.36265	2.86022	3.43954	3.74542	4.53419	4.94425	5.22396	5.40505	5.54243	5.64417	5.72664			1219.2	1.25112				2.36865	2.04356	0.235867	2.27942	2.95053	2.60216	0.351482	2.95364	3.69488	3.31535	0.389333	3.70469	4.12192	3.72421	0.433302	4.15751	5.39883	4.94234	0.566625	5.50897	6.21584	5.72258	0.666618	6.3892	6.87227	6.29279	0.799942	7.09273	7.38924	6.83829
1119.8	1.31462	2.38342	2.88669	3.47056	3.78268	4.57615	4.99459	5.27716	5.45884	5.60273	5.70427	5.78629			1219.9	1.24308				2.35451	2.02154	0.24097	2.26251	2.93292	2.57514	0.356504	2.93165	3.67113	3.28224	0.395594	3.67783	4.09638	3.68774	0.439941	4.12768	5.36661	4.89686	0.575308	5.47217	6.17874	5.67217	0.676833	6.34901	6.83597	6.2386	0.812199	7.0508	7.35021	6.78209
1120.5	1.31947	2.39056	2.89801	3.48418	3.79665	4.60151	5.01996	5.30762	5.49161	5.63638	5.74116	5.82505			1220.6	1.23623				2.34045	1.99948	0.246131	2.24561	2.91608	2.54805	0.361554	2.90961	3.65342	3.249	0.401906	3.65091	4.07568	3.65113	0.446635	4.09776	5.34195	4.85113	0.584061	5.43519	6.15177	5.62143	0.687131	6.30856	6.80613	6.18401	0.824557	7.00857	7.31813	6.72543
1121.2	1.3277	2.4088	2.9181	3.50913	3.82737	4.6366	5.06291	5.35057	5.53988	5.6846	5.79162	5.8776			1221.3	1.22942				2.32541	1.97738	0.251349	2.22873	2.89734	2.5209	0.36663	2.88753	3.62827	3.21565	0.408268	3.62392	4.05042	3.61437	0.453382	4.06775	5.30884	4.80515	0.592885	5.39804	6.11646	5.57036	0.697512	6.26788	6.76706	6.12906	0.837014	6.96607	7.27947	6.66831
1121.9	1.33999	2.42996	2.94713	3.54487	3.86456	4.6849	5.11682	5.41253	5.60402	5.75043	5.85868	5.9484			1222	1.22096				2.31153	1.95526	0.256623	2.21189	2.88005	2.49369	0.371731	2.86542	3.60662	3.18221	0.414679	3.59688	4.02717	3.57748	0.460183	4.03767	5.27959	4.75895	0.601778	5.36073	6.08415	5.519	0.707974	6.22697	6.73132	6.07374	0.849569	6.92331	7.24603	6.61075
1122.6	1.35176	2.45414	2.97372	3.58096	3.90481	4.73696	5.17488	5.4752	5.67022	5.81969	5.92925	6.02005			1222.7	1.21171				2.29509	1.93312	0.261952	2.19507	2.86022	2.46643	0.376857	2.84328	3.58179	3.14867	0.421139	3.56981	3.99853	3.54048	0.467036	4.00752	5.24445	4.71254	0.61074	5.32328	6.04505	5.46734	0.718518	6.18586	6.69114	6.01809	0.862221	6.88031	7.20112	6.55278
1123.3	1.36207	2.47343	2.99916	3.6116	3.93822	4.78079	5.22276	5.52713	5.72664	5.8776	5.99101	6.07995			1223.4	1.20393				2.27982	1.91096	0.267335	2.1783	2.8425	2.43912	0.382007	2.82113	3.56041	3.11505	0.427647	3.5427	3.97558	3.50338	0.473942	3.97732	5.21435	4.66593	0.61977	5.2857	6.01035	5.41542	0.729141	6.14456	6.65733	5.96212	0.874969	6.83709	7.16638	6.49442
1124	1.37531	2.49977	3.03319	3.6509	3.98199	4.83727	5.28567	5.595	5.79696	5.95388	6.06876	6.16027			1224.1	1.19509				2.2636	1.8888	0.27277	2.16157	2.82098	2.41179	0.387179	2.79897	3.53427	3.08136	0.434202	3.51557	3.94639	3.46618	0.480898	3.94708	5.17845	4.61914	0.628866	5.248	5.9731	5.36324	0.739843	6.10309	6.61302	5.90585	0.887811	6.79366	7.12197	6.43568
1124.7	1.3858	2.52	3.05703	3.68468	4.01883	4.88652	5.34195	5.65718	5.85868	6.02005	6.13621	6.22874			1224.8	1.18659				2.24543	1.86663	0.278257	2.14488	2.79834	2.38443	0.392372	2.7768	3.50833	3.04762	0.440803	3.48842	3.91832	3.4289	0.487904	3.91681	5.14162	4.57218	0.638029	5.21021	5.93198	5.31083	0.750622	6.06145	6.57052	5.8493	0.900747	6.75005	7.07294	6.37659
1125.4	1.39894	2.54331	3.08603	3.72135	4.06163	4.93628	5.39883	5.71874	5.92789	6.08836	6.20869	6.30667			1225.5	1.17842				2.22998	1.84446	0.283794	2.12826	2.77907	2.35705	0.397586	2.75464	3.48418	3.01382	0.447449	3.46127	3.89135	3.39155	0.494961	3.88651	5.10975	4.52507	0.647256	5.17233	5.89794	5.2582	0.761478	6.01968	6.53431	5.79248	0.913774	6.70626	7.0372	6.31716
1126.1	1.41124	2.56567	3.11387	3.75751	4.1011	4.9877	5.45884	5.78229	5.99377	6.15602	6.28203	6.38117			1226.2	1.16896				2.21259	1.82231	0.289379	2.11169	2.75804	2.32966	0.40282	2.73248	3.45462	2.97999	0.454139	3.43413	3.86011	3.35414	0.502066	3.85621	5.06991	4.47783	0.656548	5.13438	5.85059	5.20537	0.772409	5.97778	6.48187	5.73542	0.926891	6.66231	6.98393	6.25741
1126.8	1.42102	2.58702	3.13979	3.78966	4.13523	5.03385	5.51188	5.83983	6.0562	6.22587	6.346	6.44614			1226.9	1.16038				2.19533	1.80017	0.295012	2.09518	2.73401	2.30228	0.408072	2.71035	3.43005	2.94612	0.460873	3.407	3.83178	3.31669	0.509219	3.82591	5.03385	4.43046	0.665902	5.09636	5.80898	5.15235	0.783414	5.93577	6.44021	5.67813	0.940096	6.61823	6.93585	6.19737
1127.5	1.43648	2.61517	3.17614	3.83442	4.18504	5.09683	5.58085	5.91289	6.13479	6.30812	6.43428	6.53732			1227.6	1.14974				2.17821	1.77805	0.30069	2.07874	2.71269	2.27489	0.413341	2.68823	3.40173	2.91224	0.467648	3.37989	3.80102	3.27919	0.516419	3.79561	4.99689	4.38298	0.675317	5.0583	5.76899	5.09916	0.794491	5.89366	6.39293	5.62063	0.953389	6.57402	6.8897	6.13705
1128.2	1.45211	2.64484	3.21144	3.87704	4.23058	5.15941	5.65067	5.99101	6.21441	6.38999	6.51778	6.62369			1228.3	1.1413				2.16023	1.75596	0.306413	2.06237	2.69215	2.24752	0.418627	2.66615	3.37443	2.87835	0.474465	3.35281	3.77138	3.24167	0.523666	3.76533	4.95793	4.33541	0.684794	5.02021	5.724	5.04583	0.80564	5.85147	6.34892	5.56294	0.966768	6.52971	6.84069	6.07647
1128.9	1.45915	2.6595	3.22998	3.90122	4.26187	5.19757	5.69377	6.0381	6.26758	6.44318	6.57355	6.67882			1229	1.13084				2.1419	1.7339	0.312177	2.04608	2.66993	2.22017	0.423929	2.6441	3.34811	2.84445	0.481321	3.32577	3.74197	3.20413	0.530958	3.73509	4.91926	4.28776	0.69433	4.98209	5.6846	4.99235	0.816858	5.80921	6.30231	5.50508	0.98023	6.48531	6.7936	6.01566
1129.6	1.47571	2.68844	3.26814	3.9473	4.31023	5.26017	5.76501	6.11505	6.34746	6.5298	6.66193	6.7733			1229.7	1.12202				2.12324	1.71189	0.317983	2.02987	2.64789	2.19285	0.429244	2.6221	3.32124	2.81056	0.488216	3.29878	3.71108	3.16659	0.538294	3.70488	4.8809	4.24005	0.703923	4.94397	5.63897	4.93875	0.828145	5.7669	6.25461	5.44706	0.993774	6.44084	6.74217	5.95462
1130.3	1.48388	2.7052	3.287	3.97009	4.3401	5.29663	5.80764	6.16311	6.39735	6.58415	6.71583	6.82967			1230.4	1.11327				2.10523	1.68991	0.323828	2.01374	2.62482	2.16557	0.434572	2.60014	3.29079	2.77669	0.495149	3.27184	3.67875	3.12905	0.545675	3.67472	4.84061	4.19228	0.713574	4.90586	5.59371	4.88506	0.839499	5.72455	6.20297	5.38891	1.0074	6.39631	6.6896	5.89339
1131	1.4983	2.73401	3.32277	4.01698	4.38834	5.3592	5.87895	6.23878	6.48187	6.66807	6.80613	6.9199			1231.1	1.10484				2.08785	1.66799	0.32971	1.9977	2.60315	2.13832	0.439912	2.57823	3.26362	2.74285	0.502119	3.24497	3.65006	3.09152	0.553097	3.64462	4.80286	4.14448	0.723281	4.86776	5.55137	4.83127	0.850919	5.68219	6.16027	5.33063	1.0211	6.35173	6.64049	5.83197
1131.7	1.51008	2.75867	3.35351	4.05509	4.432	5.41377	5.94292	6.30957	6.5539	6.74528	6.88494	7.00003			1231.8	1.09144				2.0649	1.64612	0.335628	1.98175	2.57395	2.11113	0.445263	2.55639	3.23073	2.70904	0.509123	3.21816	3.60994	3.05403	0.560561	3.61459	4.75226	4.09665	0.733042	4.82969	5.49541	4.77741	0.862402	5.63981	6.09818	5.27225	1.03488	6.30713	6.57506	5.77039
1132.4	1.5181	2.77013	3.36822	4.07474	4.45451	5.44628	5.97585	6.34892	6.59629	6.78891	6.93107	7.0518			1232.5	1.08044				2.04409	1.62432	0.341579	1.9659	2.54918	2.08399	0.450623	2.53461	3.19742	2.67528	0.516162	3.19144	3.57355	3.01656	0.568066	3.58463	4.70652	4.04881	0.742856	4.79166	5.44252	4.72349	0.873948	5.59744	6.03949	5.21379	1.04874	6.26253	6.51328	5.70867
1133.1	1.53073	2.79576	3.39938	4.11623	4.4978	5.50427	6.04227	6.418	6.67268	6.8691	7.01132	7.1351			1233.2	1.07078				2.02349	1.60258	0.347561	1.95014	2.52348	2.05691	0.455992	2.5129	3.16446	2.64157	0.523233	3.1648	3.53753	2.97915	0.57561	3.55476	4.65908	4.00097	0.752721	4.75369	5.39014	4.66954	0.885554	5.55509	5.98274	5.15526	1.06267	6.21792	6.45506	5.64683
1133.8	1.54099	2.81514	3.42689	4.14859	4.53419	5.55137	6.09818	6.47888	6.73597	6.93585	7.08272	7.20444			1233.9	1.05877				2.00263	1.58091	0.353574	1.93448	2.49632	2.02991	0.461367	2.49127	3.13184	2.60792	0.530336	3.13826	3.50348	2.94178	0.583193	3.52498	4.61424	3.95314	0.762637	4.71578	5.33949	4.61556	0.89722	5.51278	5.92652	5.09667	1.07666	6.17334	6.3944	5.58487
1134.5	1.55274	2.83661	3.45144	4.18215	4.57088	5.59758	6.15035	6.53883	6.79986	7.00164	7.1499	7.27612			1234.6	1.04978				1.98381	1.55932	0.359614	1.91893	2.47343	2.00298	0.466749	2.46973	3.10313	2.57435	0.537468	3.11182	3.47056	2.90449	0.590813	3.4953	4.57404	3.90535	0.772601	4.67795	5.29298	4.56157	0.908943	5.47051	5.87625	5.03805	1.09073	6.12878	6.34162	5.52283
1135.2	1.56315	2.85627	3.47937	4.2092	4.60681	5.64417	6.20297	6.59629	6.8612	7.06968	7.21606	7.34514			1235.3	1.0404				1.96517	1.5378	0.365679	1.90348	2.45019	1.97613	0.472134	2.44826	3.07468	2.54085	0.54463	3.08548	3.43716	2.86726	0.598469	3.46573	4.53211	3.8576	0.782613	4.64021	5.24445	4.50758	0.920721	5.4283	5.82505	4.97942	1.10487	6.08428	6.28637	5.46072
1135.9	1.57	2.8721	3.49623	4.23545	4.6334	5.68329	6.24741	6.64508	6.91194	7.12197	7.27445	7.40628			1236	1.0292				1.94581	1.51638	0.371767	1.88815	2.42605	1.94937	0.477523	2.42689	3.04439	2.50744	0.551818	3.05926	3.40408	2.83012	0.60616	3.43628	4.48849	3.8099	0.792671	4.60257	5.19637	4.45361	0.932554	5.38617	5.77165	4.92078	1.11906	6.03984	6.22874	5.39856
1136.6	1.58307	2.89601	3.52614	4.27169	4.67627	5.73588	6.30812	6.71274	6.98715	7.1978	7.3536	7.49031			1236.7	1.01953				1.92797	1.49504	0.377877	1.87292	2.4027	1.92271	0.482914	2.40562	3.01648	2.47413	0.559033	3.03316	3.3721	2.79308	0.613885	3.40696	4.44734	3.76227	0.802772	4.56504	5.14754	4.39968	0.944438	5.34412	5.72137	4.86215	1.13333	5.99548	6.17305	5.33636
1137.3	1.58891	2.90804	3.5416	4.29438	4.69894	5.77032	6.34892	6.75616	7.0291	7.2477	7.40798	7.5405			1237.4	1.00898				1.9081	1.4738	0.384005	1.85781	2.37848	1.89614	0.488305	2.38445	2.9847	2.44092	0.566272	3.00719	3.33964	2.75613	0.621642	3.37777	4.40352	3.71472	0.812916	4.52763	5.098	4.3458	0.956372	5.30217	5.6637	4.80356	1.14765	5.95121	6.11505	5.27415
1138	1.60214	2.93089	3.57273	4.33212	4.74024	5.82237	6.40914	6.82496	7.10395	7.32487	7.48514	7.62255			1238.1	1.00099				1.88843	1.45266	0.390149	1.84281	2.35396	1.86969	0.493696	2.36339	2.95257	2.40782	0.573534	2.98135	3.30141	2.7193	0.629431	3.34873	4.35813	3.66725	0.823102	4.49036	5.04545	4.29198	0.968355	5.26033	5.6079	4.74501	1.16203	5.90704	6.0548	5.21194
1138.7	1.6099	2.94713	3.59087	4.35612	4.7676	5.85868	6.45208	6.87385	7.15484	7.38244	7.54223	7.68069			1238.8	0.993				1.8681	1.43163	0.396308	1.82794	2.32863	1.84335	0.499084	2.34243	2.92483	2.37483	0.580817	2.95565	3.26964	2.68258	0.637249	3.31983	4.31618	3.6199	0.833326	4.45322	4.99689	4.23824	0.980384	5.21862	5.5552	4.68653	1.17646	5.86299	5.99929	5.14974
1139.4	1.61585	2.95937	3.60745	4.37623	4.79181	5.89115	6.49083	6.91512	7.20278	7.42848	7.59277	7.73393			1239.5	0.98502				1.84969	1.4107	0.402478	1.81318	2.30569	1.81712	0.504469	2.32159	2.89334	2.34198	0.58812	2.9301	3.23519	2.64599	0.645097	3.29109	4.27169	3.57265	0.843588	4.41624	4.94766	4.18458	0.992457	5.17704	5.50174	4.62812	1.19095	5.81907	5.94155	5.08758
1140.1	1.6248	2.97852	3.63162	4.40961	4.82836	5.94155	6.54636	6.97429	7.26775	7.49894	7.66832	7.81088			1240.2	0.97703				1.83105	1.38989	0.408657	1.79854	2.28139	1.79102	0.509849	2.30087	2.86352	2.30926	0.595442	2.9047	3.20332	2.60954	0.652972	3.26251	4.22766	3.52554	0.853886	4.37942	4.89892	4.13104	1.00457	5.13561	5.44628	4.56981	1.20549	5.77529	5.88166	5.02547
1140.8	1.63117	2.99226	3.65006	4.43302	4.854	5.97585	6.59022	7.02263	7.31981	7.54918	7.72503	7.86865			1240.9	0.96904				1.81259	1.36919	0.414843	1.78403	2.26048	1.76505	0.515223	2.28028	2.83596	2.27668	0.60278	2.87946	3.17176	2.57324	0.660873	3.23411	4.18986	3.47856	0.864218	4.34277	4.854	4.07761	1.01673	5.09434	5.39635	4.5116	1.22007	5.73167	5.83042	4.96343
1141.5	1.6387	3.00746	3.66606	4.45554	4.87978	6.01312	6.62979	7.06806	7.36885	7.60501	7.77678	7.92501			1241.6	0.96106				1.79763	1.34861	0.421033	1.76965	2.23924	1.73922	0.52059	2.25981	2.81125	2.24424	0.610133	2.85438	3.14485	2.53708	0.668799	3.20588	4.15336	3.43173	0.874583	4.30631	4.81393	4.02431	1.02892	5.05323	5.3518	4.45351	1.2347	5.68822	5.78229	4.90148
1142.2	1.64324	3.01787	3.67959	4.46992	4.89779	6.03949	6.66193	7.10559	7.40628	7.64892	7.82348	7.97627			1242.3	0.95307				1.78197	1.32816	0.427225	1.75538	2.22075	1.71352	0.525947	2.23947	2.78869	2.21196	0.6175	2.82947	3.12033	2.50109	0.676748	3.17784	4.12098	3.38506	0.884978	4.27003	4.77529	3.97116	1.04115	5.01231	5.31129	4.39557	1.24938	5.64495	5.7372	4.83962
1142.9	1.65044	3.02901	3.69488	4.49159	4.9204	6.07016	6.6973	7.14825	7.4559	7.69662	7.8759	8.02786			1243	0.94508				1.76726	1.30784	0.433415	1.74125	2.20496	1.68797	0.531294	2.21926	2.76503	2.17985	0.624879	2.80473	3.09386	2.46526	0.684719	3.14998	4.0879	3.33856	0.895401	4.23396	4.74024	3.91816	1.05341	4.97158	5.27351	4.33777	1.2641	5.60186	5.69639	4.77788
1143.6	1.6531	3.03669	3.70595	4.50402	4.93969	6.09256	6.73132	7.1829	7.49549	7.73749	7.91772	8.07421			1243.7	0.9371				1.75469	1.28764	0.439602	1.72725	2.18726	1.66257	0.536628	2.1992	2.74663	2.1479	0.632268	2.78016	3.07326	2.42961	0.69271	3.12232	4.05976	3.29224	0.905852	4.19809	4.7076	3.86534	1.06571	4.93105	5.23721	4.28014	1.27885	5.55898	5.65979	4.71628
1144.3	1.65615	3.04369	3.71535	4.51856	4.9545	6.11787	6.75772	7.2144	7.52835	7.7732	7.95793	8.11708			1244.4	0.92911				1.74181	1.26759	0.445782	1.71337	2.1712	1.63732	0.54195	2.17927	2.72584	2.11612	0.639665	2.75579	3.0493	2.39414	0.700721	3.09486	4.02903	3.24611	0.916327	4.16244	4.67305	3.8127	1.07803	4.89073	5.19876	4.22268	1.29364	5.51632	5.61694	4.65482
1145	1.65844	3.05	3.72306	4.53106	4.96821	6.13621	6.7811	7.24269	7.55962	7.80908	7.99466	8.15643			1245.1	0.92112				1.72783	1.24767	0.451953	1.69962	2.15427	1.61224	0.547257	2.15949	2.7052	2.08453	0.647068	2.73159	3.02552	2.35886	0.708749	3.06761	3.99945	3.20018	0.926825	4.12701	4.63874	3.76025	1.09038	4.85063	5.16297	4.16542	1.30846	5.47388	5.57956	4.59352
1145.7	1.6638	3.06196	3.74111	4.55198	4.99229	6.1759	6.82339	7.2929	7.61377	7.86502	8.05193	8.21486			1245.8	0.91314				1.71356	1.22789	0.458112	1.68601	2.13649	1.58731	0.552547	2.13986	2.68349	2.05312	0.654477	2.70759	3.00193	2.32378	0.716793	3.04058	3.96917	3.15447	0.937344	4.09181	4.60469	3.708	1.10276	4.81076	5.12389	4.10836	1.32331	5.43167	5.53988	4.5324
1146.4	1.66341	3.05985	3.73938	4.55093	4.99114	6.17732	6.82967	7.29962	7.6243	7.87952	8.06678	8.23379			1246.5	0.90515				1.70059	1.20826	0.464256	1.67252	2.1208	1.56256	0.55782	2.12038	2.66256	2.0219	0.661889	2.68379	2.97852	2.28891	0.724851	3.01376	3.93822	3.10898	0.947882	4.05686	4.56878	3.65598	1.11516	4.77113	5.08745	4.05153	1.33819	5.38971	5.49667	4.47147
1147.1	1.6684	3.0761	3.75664	4.5772	5.02111	6.21727	6.87543	7.3536	7.68245	7.93963	8.13205	8.29469			1247.2	0.89716				1.68772	1.18878	0.470382	1.65916	2.10184	1.53797	0.563073	2.10105	2.63998	1.99088	0.669302	2.66018	2.95393	2.25424	0.732922	2.98716	3.90661	3.06371	0.958437	4.02215	4.53419	3.60418	1.12757	4.73176	5.04545	3.99492	1.35309	5.34801	5.45381	4.41075
1147.8	1.66917	3.07114	3.75319	4.57404	5.01765	6.21871	6.88018	7.36038	7.68953	7.9506	8.14517	8.31381			1247.9	0.88918				1.67494	1.16945	0.476488	1.64594	2.08641	1.51357	0.568306	2.08187	2.6218	1.96007	0.676714	2.63678	2.93359	2.21979	0.741005	2.96079	3.87972	3.01869	0.969007	3.98769	4.50091	3.55263	1.14001	4.69263	5.00956	3.93855	1.36801	5.30656	5.41627	4.35024
1148.5	1.66994	3.08035	3.76704	4.58987	5.03965	6.24741	6.91512	7.39776	7.73393	7.99834	8.19596	8.36373			1248.6	0.88119				1.66112	1.15028	0.482571	1.63285	2.07062	1.48934	0.573517	2.06286	2.60076	1.92946	0.684124	2.61358	2.91005	2.18556	0.749098	2.93466	3.85035	2.97391	0.979589	3.9535	4.46684	3.50132	1.15246	4.65378	4.97279	3.88245	1.38295	5.2654	5.37898	4.28997
1149.2	1.67186	3.0839	3.77485	4.60045	5.0501	6.26614	6.93905	7.42677	7.76605	8.03156	8.23	8.40234			1249.3	0.8732				1.64892	1.13126	0.488627	1.61989	2.05684	1.4653	0.578704	2.044	2.58048	1.89907	0.69153	2.5906	2.88868	2.15156	0.757198	2.90876	3.82296	2.92939	0.990183	3.91957	4.43711	3.45028	1.16492	4.6152	4.93856	3.82661	1.3979	5.22451	5.33949	4.22995
1149.9	1.67494	3.08887	3.78094	4.60999	5.06407	6.28492	6.96145	7.45247	7.7983	8.06678	8.26418	8.44306			1250	0.86522				1.63757	1.1124	0.494654	1.60705	2.04127	1.44144	0.583866	2.02531	2.56212	1.86889	0.69893	2.56782	2.86748	2.11779	0.765306	2.8831	3.7949	2.88514	1.00078	3.88592	4.40453	3.3995	1.17739	4.5769	4.90343	3.77104	1.41287	5.18392	5.30274	4.17019
1150.6	1.68035	3.1017	3.79402	4.6302	5.08628	6.31393	7.00003	7.49722	7.84513	8.11895	8.32339	8.49572			1250.7	0.85723				1.62855	1.0937	0.500649	1.59435	2.02908	1.41778	0.589001	2.00678	2.548	1.83894	0.706322	2.54526	2.85167	2.08427	0.773418	2.85768	3.77311	2.84116	1.01139	3.85255	4.38026	3.34901	1.18987	4.53888	4.87865	3.71577	1.42785	5.14362	5.27473	4.1107
1151.3	1.6819	3.10527	3.79927	4.63767	5.09448	6.3314	7.02263	7.52315	7.87227	8.1508	8.35026	8.53297			1251.4	0.84924				1.61696	1.07517	0.506608	1.58178	2.01419	1.39431	0.594108	1.98842	2.52872	1.80922	0.713704	2.52292	2.83074	2.05099	0.781533	2.83252	3.74714	2.79746	1.022	3.81946	4.35111	3.29881	1.20236	4.50117	4.84507	3.6608	1.44283	5.10363	5.24083	4.0515
1152	1.68306	3.10885	3.80627	4.64943	5.10858	6.35331	7.04855	7.55092	7.90497	8.18465	8.39267	8.57235			1252.1	0.84126				1.60657	1.05681	0.51253	1.56934	2.00124	1.37104	0.599185	1.97023	2.51131	1.77973	0.721074	2.5008	2.8119	2.01796	0.789649	2.80761	3.72049	2.75405	1.03262	3.78667	4.32016	3.24891	1.21485	4.46376	4.81172	3.60614	1.45781	5.06396	5.20475	3.99259
1152.7	1.68811	3.11961	3.82296	4.66659	5.13098	6.38263	7.08272	7.59277	7.9506	8.23569	8.44306	8.6278			1252.8	0.83327				1.59625	1.03861	0.518411	1.55702	1.98747	1.34797	0.604231	1.9522	2.49689	1.75048	0.72843	2.47891	2.79383	1.98519	0.797766	2.78295	3.69743	2.71094	1.04323	3.75417	4.2924	3.19932	1.22733	4.42665	4.78189	3.55181	1.4728	5.0246	5.17249	3.93399
1153.4	1.69083	3.12752	3.83266	4.67843	5.14636	6.40619	7.10886	7.62781	7.99098	8.27561	8.48594	8.67761			1253.5	0.82528				1.58343	1.02059	0.524247	1.54484	1.97288	1.3251	0.609244	1.93435	2.47742	1.72147	0.73577	2.45724	2.77204	1.95267	0.80588	2.75855	3.67113	2.66813	1.05384	3.72197	4.26285	3.15005	1.23982	4.38987	4.75007	3.4978	1.48778	4.98558	5.13689	3.87572
1154.1	1.69239	3.13329	3.83354	4.68813	5.15585	6.42096	7.13017	7.65244	8.01678	8.30615	8.51922	8.70964			1254.2	0.8173				1.57217	1.00274	0.530037	1.53278	1.95704	1.30245	0.614223	1.91667	2.45697	1.6927	0.743093	2.4358	2.75106	1.92043	0.813991	2.73442	3.6425	2.62563	1.06445	3.69008	4.23058	3.10111	1.25229	4.3534	4.71194	3.44414	1.50275	4.94689	5.098	3.81777
1154.8	1.69395	3.1369	3.84326	4.69786	5.16654	6.44169	7.15814	7.68069	8.05193	8.34449	8.55855	8.74984			1254.9	0.80931				1.56027	0.985064	0.535776	1.52084	1.94044	1.28	0.619167	1.89916	2.43725	1.66419	0.750395	2.41458	2.72709	1.88845	0.822096	2.71055	3.61327	2.58345	1.07505	3.6585	4.19662	3.0525	1.26476	4.31727	4.67412	3.39083	1.51772	4.90855	5.05941	3.76017
1155.5	1.69668	3.14123	3.85212	4.70869	5.17845	6.46398	7.1829	7.71259	8.08537	8.38301	8.60003	8.79225			1255.6	0.80132				1.54882	0.967566	0.541463	1.50903	1.92797	1.25776	0.624073	1.88183	2.42103	1.63593	0.757676	2.3936	2.70957	1.85675	0.830194	2.68694	3.58922	2.54159	1.08564	3.62723	4.16869	3.00424	1.27722	4.28146	4.64408	3.33788	1.53267	4.87055	5.02343	3.70293
1156.2	1.70098	3.15065	3.86278	4.72498	5.20116	6.49382	7.21938	7.75532	8.13205	8.43141	8.64968	8.85116			1256.3	0.79334				1.53568	0.950247	0.547094	1.49734	1.91249	1.23574	0.62894	1.86468	2.4016	1.60792	0.764933	2.37285	2.68782	1.82532	0.838283	2.66361	3.55877	2.50007	1.09622	3.59628	4.13333	2.95633	1.28967	4.246	4.60575	3.2853	1.5476	4.8329	4.9831	3.64605
1156.9	1.70137	3.15065	3.86278	4.72716	5.20116	6.49681	7.2277	7.76784	8.14704	8.44695	8.67162	8.86952			1257	0.78535				1.52195	0.933108	0.552665	1.48577	1.8954	1.21393	0.633767	1.8477	2.38122	1.58017	0.772165	2.35234	2.66502	1.79418	0.846361	2.64054	3.53021	2.45888	1.10678	3.56566	4.10015	2.90878	1.30209	4.21087	4.56878	3.2331	1.56251	4.79561	4.94425	3.58954
1157.6	1.7053	3.16082	3.87704	4.74788	5.22637	6.53131	7.2711	7.81448	8.20163	8.50746	8.72971	8.93305			1257.7	0.77736				1.51112	0.916151	0.558175	1.47433	1.88062	1.19234	0.638552	1.83089	2.36102	1.55269	0.779368	2.33206	2.64302	1.76333	0.854426	2.61775	3.50268	2.41803	1.11733	3.53536	4.06912	2.8616	1.3145	4.1761	4.53524	3.18129	1.5774	4.75869	4.90456	3.53342
1158.3	1.70451	3.16301	3.87972	4.75226	5.23359	6.54335	7.28618	7.8343	8.22432	8.531	8.76193	8.96396			1258.4	0.76938				1.50176	0.899376	0.563619	1.463	1.86896	1.17098	0.643294	1.81427	2.34639	1.52547	0.786542	2.31201	2.62845	1.73276	0.862477	2.59524	3.48017	2.37753	1.12785	3.50539	4.04297	2.81479	1.32689	4.14167	4.50609	3.12987	1.59226	4.72214	4.87641	3.47769
1159	1.70962	3.17176	3.89314	4.7709	5.25291	6.57052	7.3215	7.87227	8.26799	8.58025	8.81252	9.01986			1259.1	0.76139				1.4897	0.882787	0.568996	1.45178	1.85439	1.14983	0.647991	1.79782	2.32809	1.49852	0.793683	2.29221	2.60675	1.70249	0.870511	2.573	3.45382	2.33739	1.13836	3.47575	4.01144	2.76836	1.33925	4.10761	4.47198	3.07886	1.6071	4.68595	4.83838	3.42236
1159.7	1.70726	3.16884	3.88956	4.7665	5.25049	6.57355	7.32487	7.88134	8.27942	8.59211	8.82267	9.03233			1259.8	0.7534				1.47945	0.866382	0.574302	1.44068	1.8395	1.12891	0.652642	1.78156	2.31047	1.47185	0.800791	2.27264	2.58643	1.67251	0.878527	2.55104	3.42847	2.2976	1.14884	3.44644	3.98199	2.72232	1.35158	4.0739	4.43813	3.02825	1.6219	4.65015	4.80286	3.36745
1160.4	1.71041	3.17761	3.90211	4.7841	5.26987	6.60237	7.36377	7.92319	8.3253	8.64371	8.87973	9.08866			1260.5	0.74542				1.46791	0.850165	0.579534	1.4297	1.82684	1.10822	0.657245	1.76547	2.29509	1.44544	0.807863	2.25331	2.56744	1.64284	0.886523	2.52936	3.40173	2.25818	1.1593	3.41748	3.95549	2.67667	1.36388	4.04055	4.40859	2.97807	1.63666	4.61472	4.7698	3.31296
1161.1	1.70608	3.17249	3.89583	4.77749	5.26502	6.60237	7.36546	7.93049	8.33297	8.65167	8.89201	9.10542			1261.2	0.73743				1.45714	0.834135	0.584689	1.41882	1.81301	1.08776	0.661799	1.74956	2.27667	1.41932	0.814896	2.23421	2.54859	1.61346	0.894497	2.50796	3.37754	2.21912	1.16973	3.38885	3.92555	2.63142	1.37615	4.00757	4.37623	2.92831	1.65138	4.57968	4.73478	3.2589
1161.8	1.70805	3.17541	3.90032	4.783	5.2723	6.61607	7.38414	7.9506	8.35988	8.6836	8.92278	9.13482			1261.9	0.72944				1.44287	0.818293	0.589765	1.40806	1.80177	1.06753	0.666302	1.73383	2.261	1.39347	0.821889	2.21536	2.53279	1.58439	0.902447	2.48684	3.35506	2.18044	1.18012	3.36056	3.90032	2.58658	1.38838	3.97496	4.3471	2.87897	1.66606	4.54503	4.70435	3.20527
1162.5	1.70844	3.17468	3.90122	4.78851	5.2808	6.62674	7.39776	7.96893	8.38108	8.70763	8.95159	9.17065			1262.6	0.72146				1.43227	0.802641	0.594758	1.3974	1.78896	1.04752	0.670753	1.71827	2.24285	1.3679	0.82884	2.19674	2.51131	1.55563	0.910371	2.466	3.32966	2.14213	1.19049	3.33262	3.87079	2.54215	1.40057	3.94272	4.3142	2.83008	1.68068	4.51077	4.66659	3.15209
1163.2	1.70883	3.17834	3.90751	4.79513	5.28689	6.64355	7.41822	7.9965	8.41201	8.74178	8.98669	9.20662			1263.3	0.71347				1.42167	0.787179	0.599666	1.38685	1.77664	1.02775	0.67515	1.7029	2.22946	1.34261	0.835746	2.17836	2.49689	1.52718	0.918267	2.44544	3.30826	2.10421	1.20081	3.30502	3.84592	2.49813	1.41272	3.91085	4.28746	2.78163	1.69526	4.4769	4.63767	3.09936
1163.9	1.70687	3.17687	3.90571	4.79513	5.2881	6.64814	7.42848	8.0094	8.42752	8.75992	9.00741	9.22996			1264	0.70549				1.41108	0.771907	0.604486	1.37639	1.76401	1.00821	0.679493	1.6877	2.21106	1.31761	0.842606	2.16022	2.47571	1.49904	0.926134	2.42517	3.28246	2.06667	1.2111	3.27776	3.81593	2.45453	1.42482	3.87936	4.25402	2.73363	1.70979	4.44342	4.60363	3.04708
1164.6	1.70923	3.18053	3.91021	4.80397	5.29785	6.66653	7.45075	8.03341	8.45863	8.79427	9.04274	9.27043			1264.7	0.6975				1.40048	0.756827	0.609215	1.36604	1.75025	0.988907	0.683778	1.67269	2.19634	1.2929	0.849417	2.14231	2.45923	1.47121	0.933969	2.40518	3.25987	2.02951	1.22134	3.25086	3.78791	2.41136	1.43688	3.84824	4.22474	2.68609	1.72425	4.41034	4.56983	2.99528
1165.3	1.70726	3.17907	3.91201	4.80839	5.30396	6.67729	7.46793	8.05564	8.48203	8.82064	9.07194	9.30251			1265.4	0.69126				1.38988	0.741938	0.613851	1.35579	1.737	0.969837	0.688006	1.65784	2.17871	1.26847	0.856178	2.12465	2.43893	1.4437	0.941771	2.38547	3.23296	1.99275	1.23155	3.22429	3.76011	2.36862	1.44888	3.8175	4.18986	2.639	1.73865	4.37766	4.53315	2.94394
1166	1.7049	3.17834	3.91111	4.80839	5.30518	6.6819	7.47309	8.06678	8.49767	8.8369	9.09076	9.32395			1266.1	0.68687				1.37928	0.72724	0.61839	1.34563	1.72425	0.951003	0.692175	1.64318	2.16371	1.24433	0.862886	2.10722	2.42382	1.41651	0.949537	2.36604	3.2107	1.95638	1.2417	3.19808	3.73336	2.32632	1.46083	3.78714	4.16294	2.59238	1.75299	4.34537	4.50298	2.89308
1166.7	1.70687	3.18346	3.91922	4.81615	5.31496	6.70039	7.49894	8.09655	8.52904	8.87565	9.13272	9.36915			1266.8	0.68247				1.36868	0.712735	0.622831	1.33557	1.71317	0.932405	0.696283	1.62869	2.14833	1.22048	0.869539	2.09002	2.40769	1.38963	0.957266	2.3469	3.1886	1.92041	1.25181	3.17221	3.70851	2.28445	1.47272	3.75717	4.13523	2.54623	1.76726	4.31349	4.47301	2.84271
1167.4	1.70569	3.18053	3.91381	4.81504	5.31496	6.70039	7.50585	8.10588	8.5428	8.88792	9.15166	9.38426			1267.5	0.67807				1.35808	0.698422	0.62717	1.32559	1.70255	0.914043	0.700328	1.61437	2.13403	1.19692	0.876135	2.07306	2.39001	1.36308	0.964956	2.32803	3.16811	1.88483	1.26187	3.1467	3.68383	2.24302	1.48455	3.72757	4.10582	2.50055	1.78146	4.28201	4.44222	2.79282
1168.1	1.70451	3.182	3.91832	4.81948	5.32231	6.71738	7.52489	8.13018	8.57235	8.92072	9.18333	9.42106			1268.2	0.67368				1.34748	0.684301	0.631404	1.31571	1.69317	0.895919	0.704311	1.60023	2.12227	1.17365	0.882673	2.05633	2.37684	1.33685	0.972604	2.30945	3.14992	1.84966	1.27187	3.12153	3.66269	2.20204	1.49631	3.69836	4.08413	2.45536	1.79558	4.25093	4.41977	2.74343
1168.8	1.70451	3.17907	3.91742	4.81837	5.32231	6.72202	7.53356	8.14329	8.58816	8.94129	9.20238	9.44278			1268.9	0.66928				1.33688	0.670373	0.635533	1.30591	1.68229	0.878032	0.708228	1.58626	2.10863	1.15068	0.889149	2.03983	2.36048	1.31094	0.980209	2.29115	3.12896	1.81489	1.28181	3.0967	3.63831	2.16151	1.50801	3.66952	4.05602	2.41064	1.80962	4.22026	4.39137	2.69454
1169.5	1.70648	3.18273	3.92013	4.82614	5.33212	6.74062	7.55614	8.17147	8.61589	8.97429	9.23847	9.48418			1269.6	0.66489				1.32628	0.656636	0.639552	1.29619	1.67109	0.860382	0.712079	1.57246	2.09508	1.128	0.895562	2.02356	2.34639	1.28535	0.987768	2.27312	3.11028	1.78053	1.2917	3.07223	3.6141	2.12143	1.51964	3.64107	4.02903	2.36641	1.82357	4.18998	4.36114	2.64615
1170.2	1.70177	3.17761	3.91562	4.81948	5.32353	6.73597	7.5544	8.16959	8.62184	8.97842	9.24911	9.49511			1270.3	0.66049				1.31568	0.643092	0.64346	1.28655	1.65997	0.84297	0.715863	1.55883	2.07922	1.10561	0.901911	2.00752	2.32809	1.26009	0.995281	2.25537	3.08745	1.74658	1.30152	3.0481	3.58757	2.0818	1.5312	3.613	4.00313	2.32267	1.83744	4.16011	4.33012	2.59826
1170.9	1.70373	3.18346	3.92645	4.83504	5.34195	6.76239	7.58752	8.20918	8.66563	9.02818	9.30251	9.54993			1271	0.65609				1.30508	0.62974	0.647254	1.27699	1.6493	0.825796	0.719579	1.54537	2.06728	1.08351	0.908192	1.9917	2.3142	1.23515	1.00274	2.2379	3.06902	1.71303	1.31128	3.02431	3.56862	2.04263	1.54268	3.58531	3.97832	2.27941	1.85122	4.13063	4.30328	2.55089
1171.6	1.70098	3.18053	3.92013	4.8317	5.33703	6.76083	7.58752	8.21107	8.67162	9.03858	9.30894	9.56093			1271.7	0.6517				1.29448	0.616579	0.650932	1.26751	1.63569	0.808859	0.723224	1.53208	2.05022	1.06171	0.914404	1.97611	2.29615	1.21054	1.01016	2.2207	3.04229	1.6799	1.32097	3.00087	3.53916	2.00392	1.55409	3.558	3.94366	2.23666	1.8649	4.10156	4.26776	2.50404
1172.3	1.70137	3.1798	3.92013	4.83281	5.33949	6.76862	7.60151	8.22811	8.69161	9.05941	9.33684	9.58959			1272.4	0.6473				1.28389	0.603609	0.654491	1.2581	1.6233	0.792159	0.726798	1.51896	2.03517	1.0402	0.920544	1.96075	2.27877	1.18625	1.01752	2.20377	3.01995	1.64718	1.3306	2.97778	3.51156	1.96566	1.56541	3.53107	3.91381	2.1944	1.87849	4.07289	4.23643	2.4577
1173	1.70098	3.18127	3.92374	4.83615	5.34441	6.77798	7.61553	8.24708	8.71365	9.08448	9.36483	9.61834			1273.1	0.64291				1.27329	0.59083	0.65793	1.24876	1.61065	0.775696	0.730299	1.50599	2.01976	1.01899	0.926612	1.9456	2.25944	1.16229	1.02482	2.18711	2.99571	1.61487	1.34015	2.95502	3.48257	1.92787	1.57665	3.50452	3.88419	2.15264	1.89198	4.04461	4.20146	2.41189
1173.7	1.69512	3.17395	3.91562	4.83059	5.33703	6.77485	7.61202	8.25087	8.71565	9.09076	9.3713	9.62942			1273.8	0.63851				1.26269	0.578241	0.661247	1.23949	1.59809	0.75947	0.733727	1.4932	2.00447	0.998071	0.932604	1.93068	2.2444	1.13866	1.03207	2.17073	2.97372	1.58297	1.34963	2.9326	3.457	1.89055	1.5878	3.47834	3.8539	2.11138	1.90536	4.01673	4.17061	2.3666
1174.4	1.69395	3.17103	3.91111	4.82614	5.33703	6.7733	7.61904	8.25848	8.7277	9.10752	9.38858	9.64717			1274.5	0.63411				1.25209	0.565842	0.664439	1.23028	1.58928	0.74348	0.737079	1.48056	1.98976	0.977446	0.93852	1.91597	2.22792	1.11535	1.03926	2.1546	2.95393	1.55149	1.35903	2.91052	3.434	1.85369	1.59886	3.45254	3.82913	2.07062	1.91863	3.98925	4.1419	2.32184
1175.1	1.68888	3.16082	3.90211	4.81504	5.32353	6.7655	7.61027	8.25277	8.72569	9.10332	9.39074	9.65384			1275.2	0.62972				1.24149	0.553631	0.667504	1.22114	1.57906	0.727725	0.740356	1.46808	1.97651	0.957113	0.944356	1.90147	2.21208	1.09236	1.04638	2.13875	2.93224	1.52043	1.36835	2.88877	3.40879	1.81729	1.60982	3.42711	3.80189	2.03037	1.93179	3.96216	4.11339	2.27761
1175.8	1.68733	3.15937	3.90032	4.81282	5.32353	6.76862	7.61377	8.26038	8.73575	9.12011	9.41022	9.67386			1275.9	0.62532				1.23089	0.541609	0.670441	1.21205	1.56783	0.712205	0.743556	1.45576	1.96336	0.937073	0.950111	1.88718	2.19938	1.06971	1.05345	2.12315	2.9134	1.48978	1.37759	2.86736	3.38688	1.78136	1.62069	3.40205	3.77746	1.99062	1.94483	3.93545	4.08507	2.23391
1176.5	1.68035	3.14775	3.88419	4.79844	5.30762	6.75305	7.60151	8.24898	8.72569	9.11171	9.40156	9.66273			1276.6	0.62093				1.22029	0.529774	0.673248	1.20302	1.55955	0.696919	0.746677	1.4436	1.95164	0.917325	0.955783	1.87311	2.18524	1.04737	1.06045	2.10782	2.89668	1.45954	1.38674	2.84628	3.36667	1.7459	1.63146	3.37736	3.75405	1.95139	1.95775	3.90914	4.06069	2.19075
1177.2	1.67726	3.13906	3.87525	4.7874	5.29785	6.74217	7.59277	8.24138	8.72168	9.10542	9.39723	9.66273			1277.3	0.61653				1.20969	0.518126	0.675922	1.19405	1.55167	0.681867	0.749718	1.43158	1.94312	0.897869	0.961371	1.85924	2.1727	1.02536	1.06738	2.09274	2.87939	1.42972	1.39581	2.82552	3.34888	1.71091	1.64213	3.35303	3.73422	1.91265	1.97055	3.88321	4.03738	2.14812
1177.9	1.66994	3.12896	3.86634	4.77859	5.28567	6.73597	7.58578	8.23569	8.71766	9.10961	9.3994	9.67164			1278	0.61214				1.19909	0.506664	0.678463	1.18513	1.5417	0.667047	0.752679	1.41973	1.93152	0.878703	0.966872	1.84557	2.16023	1.00367	1.07425	2.07792	2.86484	1.40031	1.40479	2.8051	3.32966	1.67638	1.65269	3.32907	3.71193	1.87443	1.98323	3.85766	4.01328	2.10602
1178.6	1.66456	3.1232	3.85567	4.76431	5.27351	6.72048	7.57705	8.23	8.71365	9.10123	9.39723	9.66941			1278.7	0.60774				1.18849	0.495386	0.680869	1.17625	1.53568	0.652458	0.755559	1.40802	1.92309	0.859827	0.972284	1.83211	2.15179	0.982306	1.08104	2.06335	2.85036	1.37132	1.41367	2.78499	3.3136	1.64233	1.66314	3.30547	3.69573	1.83671	1.99577	3.83248	3.99485	2.06447
1179.3	1.65806	3.11172	3.84326	4.75335	5.26381	6.70965	7.56659	8.22243	8.71164	9.10123	9.39723	9.66718			1279.4	0.60334				1.17789	0.484292	0.683138	1.16743	1.52581	0.638099	0.758356	1.39646	1.91073	0.841239	0.977606	1.81884	2.13698	0.961261	1.08776	2.04903	2.83204	1.34274	1.42246	2.7652	3.29079	1.60874	1.67348	3.28222	3.66944	1.79951	2.00818	3.80769	3.96917	2.02345
1180	1.65348	3.09956	3.83354	4.74024	5.24928	6.6973	7.5544	8.20918	8.70162	9.09494	9.39074	9.66718			1280.1	0.59895				1.16729	0.47338	0.685269	1.15865	1.51565	0.62397	0.761069	1.38504	1.89671	0.822939	0.982835	1.80577	2.12178	0.940536	1.09441	2.03495	2.8119	1.31457	1.43116	2.74573	3.26814	1.57562	1.68371	3.25933	3.64334	1.76281	2.02045	3.78326	3.93913	1.98297
1180.7	1.64702	3.0903	3.81944	4.72607	5.23239	6.68036	7.53876	8.19596	8.69161	9.08657	9.38426	9.65606			1280.8	0.59455				1.1567	0.46265	0.68726	1.14991	1.50557	0.610069	0.763698	1.37377	1.88452	0.804924	0.987971	1.7929	2.10863	0.920131	1.10098	2.02112	2.79319	1.28682	1.43975	2.72657	3.24638	1.54296	1.69382	3.23679	3.6191	1.72662	2.03259	3.75921	3.91291	1.94304
1181.4	1.64135	3.08177	3.81154	4.71411	5.22276	6.67268	7.53182	8.1903	8.6856	9.08657	9.38426	9.66273			1281.5	0.59016				1.1461	0.452101	0.68911	1.14121	1.49348	0.596395	0.766241	1.36264	1.86896	0.787195	0.99301	1.78021	2.09122	0.900043	1.10748	2.00752	2.77141	1.25947	1.44824	2.70772	3.22107	1.51078	1.70381	3.21459	3.5917	1.69094	2.04458	3.73552	3.8824	1.90364
1182.1	1.63343	3.06761	3.7949	4.69678	5.20595	6.6512	7.51104	8.17523	8.67162	9.06985	9.37346	9.64717			1282.2	0.58576				1.1355	0.44173	0.690819	1.13255	1.48081	0.582946	0.768697	1.35164	1.8531	0.769749	0.997953	1.7677	2.07444	0.880271	1.11389	1.99416	2.74853	1.23254	1.45663	2.68917	3.19301	1.47906	1.71368	3.19274	3.55959	1.65577	2.05642	3.71218	3.84946	1.86478
1182.8	1.6293	3.06267	3.78791	4.69029	5.19876	6.64661	7.51104	8.17523	8.66962	9.07612	9.37778	9.66051			1282.9	0.58136				1.1249	0.431538	0.692384	1.12392	1.47197	0.569721	0.771067	1.34079	1.8412	0.752586	1.0028	1.75538	2.06016	0.860813	1.12023	1.98104	2.72835	1.20602	1.46491	2.67093	3.17249	1.4478	1.72343	3.17123	3.5359	1.6211	2.06811	3.68921	3.82208	1.82646
1183.5	1.6263	3.05703	3.78094	4.68382	5.19159	6.64049	7.50758	8.17523	8.67561	9.07821	9.38426	9.66941			1283.6	0.57697				1.1143	0.421522	0.693805	1.11533	1.46614	0.556719	0.773348	1.33007	1.82894	0.735702	1.00754	1.74324	2.0455	0.841669	1.12648	1.96815	2.70894	1.1799	1.47308	2.65298	3.14702	1.41701	1.73304	3.15005	3.50833	1.58693	2.07965	3.66658	3.79053	1.78868
1184.2	1.62181	3.04789	3.76964	4.67305	5.17726	6.63132	7.49376	8.16394	8.66563	9.07194	9.3821	9.66718			1284.3	0.57257				1.1037	0.411681	0.695082	1.10676	1.45575	0.543938	0.77554	1.31948	1.81719	0.719098	1.01218	1.73128	2.03142	0.822836	1.13264	1.95548	2.69092	1.15418	1.48115	2.63533	3.1268	1.38668	1.74252	3.1292	3.48498	1.55328	2.09103	3.6443	3.76617	1.75144
1184.9	1.61808	3.04159	3.76357	4.66552	5.17011	6.62369	7.49204	8.16582	8.66962	9.07821	9.38858	9.67609			1285	0.56818				1.0931	0.402014	0.696213	1.09823	1.44536	0.531377	0.777643	1.30902	1.80553	0.70277	1.01671	1.71948	2.01963	0.804313	1.13872	1.94303	2.67427	1.12887	1.48909	2.61797	3.10746	1.35681	1.75187	3.10868	3.46263	1.52012	2.10225	3.62237	3.74288	1.71473
1185.6	1.61102	3.03249	3.75405	4.65372	5.1606	6.61455	7.48686	8.16018	8.66563	9.07612	9.38858	9.67609			1285.7	0.56378				1.0825	0.392519	0.697197	1.08972	1.43497	0.519033	0.779654	1.29869	1.79537	0.686718	1.02114	1.70786	2.00851	0.786098	1.14471	1.9308	2.6591	1.10397	1.49692	2.60089	3.08913	1.3274	1.76109	3.08849	3.44283	1.48746	2.11331	3.60077	3.72113	1.67856
1186.3	1.61065	3.0297	3.75059	4.6505	5.15941	6.61607	7.48859	8.1677	8.67561	9.08866	9.40373	9.69617			1286.4	0.55938				1.0719	0.383196	0.698034	1.08123	1.42458	0.506906	0.781575	1.28848	1.78583	0.670939	1.02547	1.6964	1.99781	0.768188	1.15061	1.91879	2.64449	1.07946	1.50464	2.58409	3.07215	1.29845	1.77016	3.06861	3.42351	1.45531	2.12419	3.5795	3.69999	1.64293
1187	1.60583	3.02482	3.74369	4.64622	5.1511	6.6115	7.48859	8.16582	8.67961	9.09285	9.41239	9.70287			1287.1	0.55499				1.0613	0.374042	0.698724	1.07277	1.41419	0.494993	0.783404	1.2784	1.77534	0.655432	1.02968	1.68511	1.98611	0.750582	1.15641	1.90699	2.62895	1.05535	1.51223	2.56758	3.0541	1.26995	1.77909	3.04904	3.40325	1.42365	2.13491	3.55856	3.67768	1.60783
1187.7	1.60214	3.01787	3.73594	4.63554	5.14399	6.60237	7.47997	8.16206	8.67761	9.09494	9.41239	9.71181			1287.8	0.55059				1.0507	0.365056	0.699265	1.06432	1.4038	0.483293	0.78514	1.26843	1.76483	0.640194	1.03378	1.67398	1.97405	0.733277	1.16212	1.8954	2.61269	1.03163	1.5197	2.55133	3.03515	1.2419	1.78788	3.02978	3.38205	1.39249	2.14546	3.53794	3.65472	1.57326
1188.4	1.60177	3.01648	3.7368	4.63981	5.14754	6.6115	7.49549	8.18276	8.69961	9.12011	9.43844	9.73644			1288.5	0.5462				1.0401	0.356236	0.699658	1.05589	1.39341	0.471804	0.786782	1.25859	1.75449	0.625223	1.03777	1.663	1.96235	0.716272	1.16774	1.88401	2.59674	1.00831	1.52705	2.53535	3.01678	1.21431	1.79652	3.01083	3.3613	1.36181	2.15583	3.51764	3.63202	1.53922
1189.1	1.60029	3.01439	3.73078	4.63447	5.14162	6.60846	7.49204	8.18088	8.70362	9.12641	9.44931	9.74765			1289.2	0.54167				1.02951	0.347581	0.699903	1.04748	1.38302	0.460524	0.788331	1.24885	1.74468	0.610517	1.04165	1.65217	1.95148	0.699564	1.17326	1.87282	2.58174	0.985372	1.53426	2.51964	2.99939	1.18716	1.80502	2.99217	3.34166	1.33163	2.16602	3.49765	3.61049	1.5057
1189.8	1.59588	3.00469	3.72563	4.62488	5.13452	6.60237	7.48859	8.18276	8.70563	9.13061	9.45584	9.75439			1289.9	0.5371				1.01891	0.339089	0.699998	1.03909	1.37263	0.449451	0.789785	1.23924	1.73541	0.596075	1.04542	1.64149	1.94101	0.683151	1.17868	1.86183	2.56776	0.962826	1.54135	2.50418	2.98301	1.16046	1.81336	2.97381	3.32279	1.30194	2.17603	3.47797	3.59	1.47271
1190.5	1.59588	3.00469	3.72477	4.62488	5.1357	6.60693	7.49722	8.19219	8.71766	9.14534	9.47109	9.77462			1290.6	0.53254				1.00831	0.330759	0.699945	1.0307	1.36224	0.438584	0.791144	1.22973	1.72653	0.581893	1.04906	1.63096	1.93097	0.66703	1.184	1.85103	2.55422	0.940666	1.54831	2.48898	2.96701	1.1342	1.82154	2.95574	3.30478	1.27273	2.18585	3.45858	3.57018	1.44025
1191.2	1.59074	2.99778	3.71621	4.61636	5.12743	6.60085	7.49204	8.18842	8.71766	9.14956	9.47545	9.78363			1291.3	0.52798				0.99771	0.322588	0.699743	1.02233	1.35185	0.427919	0.792408	1.22033	1.7178	0.56797	1.05259	1.62056	1.92103	0.651199	1.18922	1.84042	2.54082	0.918888	1.55513	2.47402	2.95131	1.10838	1.82957	2.93795	3.287	1.24401	2.19548	3.43949	3.55071	1.4083
1191.9	1.58489	2.98676	3.70339	4.60257	5.10975	6.58112	7.47309	8.17335	8.70162	9.13482	9.46673	9.77237			1292	0.52341				0.98711	0.314576	0.699393	1.01397	1.34146	0.417456	0.793576	1.21103	1.70904	0.554303	1.05601	1.61031	1.91125	0.635655	1.19433	1.82999	2.52746	0.897489	1.56182	2.45931	2.93566	1.083	1.83744	2.92044	3.26927	1.21576	2.20493	3.42069	3.53135	1.37687
1192.6	1.57834	2.97646	3.68893	4.58458	5.09331	6.55994	7.45075	8.15455	8.6836	9.11801	9.44713	9.75888			1292.7	0.51885				0.97651	0.306719	0.698893	1.00561	1.33107	0.407193	0.794647	1.20184	1.70035	0.540889	1.0593	1.60019	1.9015	0.620396	1.19934	1.81974	2.51414	0.876467	1.56837	2.44484	2.92003	1.05805	1.84514	2.9032	3.25166	1.18799	2.21417	3.40217	3.51198	1.34595
1193.3	1.57181	2.9621	3.67451	4.56983	5.07341	6.54184	7.43533	8.13767	8.66762	9.10542	9.43626	9.74541			1293.4	0.51428				0.96591	0.299018	0.698246	0.997264	1.32067	0.397126	0.795622	1.19275	1.69173	0.527727	1.06247	1.5902	1.89169	0.605419	1.20425	1.80967	2.50081	0.855818	1.57478	2.4306	2.90445	1.03353	1.85269	2.88622	3.23403	1.1607	2.22323	3.38392	3.49255	1.31555
1194	1.56639	2.95121	3.65847	4.55093	5.05359	6.52079	7.4131	8.11708	8.6457	9.08448	9.41673	9.73195			1294.1	0.50972				0.95531	0.291469	0.697451	0.98892	1.31028	0.387255	0.796499	1.18375	1.68332	0.514814	1.06552	1.58033	1.8822	0.590722	1.20904	1.79976	2.48784	0.83554	1.58106	2.41659	2.88925	1.00945	1.86007	2.86951	3.21685	1.13387	2.23208	3.36595	3.47374	1.28565
1194.7	1.55632	2.93697	3.6425	4.53002	5.03385	6.49531	7.38754	8.09096	8.62184	9.0615	9.39074	9.70733			1294.8	0.50516				0.94471	0.284072	0.696509	0.98058	1.29989	0.377576	0.79728	1.17486	1.6749	0.502146	1.06845	1.57059	1.87272	0.576301	1.21373	1.79003	2.47482	0.815628	1.58718	2.40281	2.8741	0.985782	1.86727	2.85306	3.19963	1.10751	2.24073	3.34824	3.45486	1.25626
1195.4	1.5481	2.92146	3.62326	4.51024	5.01072	6.46994	7.36207	8.06492	8.59607	9.03441	9.3713	9.68724			1295.5	0.50059				0.93411	0.276823	0.69542	0.972243	1.2895	0.368088	0.797962	1.16605	1.66654	0.489723	1.07125	1.56097	1.86328	0.562154	1.2183	1.78046	2.46194	0.796081	1.59316	2.38925	2.85904	0.962539	1.87431	2.83685	3.18252	1.08161	2.24917	3.33078	3.43612	1.22737
1196.1	1.53957	2.90536	3.60247	4.48436	4.98655	6.44318	7.33162	8.03341	8.56643	9.00534	9.34329	9.65828			1296.2	0.49603				0.92351	0.269723	0.694185	0.963907	1.27911	0.358789	0.798546	1.15733	1.65817	0.47754	1.07392	1.55146	1.85376	0.548279	1.22276	1.77104	2.44906	0.776893	1.599	2.37589	2.84383	0.939713	1.88118	2.82089	3.1653	1.05617	2.25741	3.31358	3.41723	1.19898
1196.8	1.53109	2.89135	3.58757	4.46786	4.96478	6.41653	7.30298	8.00571	8.54083	8.98256	9.31751	9.63607			1296.9	0.49147				0.91291	0.262767	0.692805	0.955572	1.26872	0.349675	0.799032	1.14871	1.64973	0.465595	1.07647	1.54207	1.84422	0.534671	1.22711	1.76178	2.43604	0.758063	1.60469	2.36275	2.82856	0.917301	1.88787	2.80517	3.14801	1.03118	2.26544	3.29662	3.39825	1.17108
1197.5	1.52195	2.87276	3.56369	4.43711	4.93287	6.38117	7.26608	7.9671	8.50354	8.94335	9.27897	9.59401			1297.6	0.4869				0.90232	0.255956	0.69128	0.947236	1.25833	0.340747	0.79942	1.14017	1.64127	0.453887	1.0789	1.53278	1.83466	0.521329	1.23135	1.75268	2.42301	0.739587	1.61022	2.34981	2.81325	0.895299	1.89438	2.78968	3.13076	1.00665	2.27325	3.27991	3.37925	1.14368
1198.2	1.51252	2.85496	3.54487	4.41672	4.90908	6.35331	7.23936	7.93963	8.47423	8.91456	9.24911	9.56753			1298.3	0.48234				0.89393	0.249286	0.689613	0.938899	1.24794	0.331999	0.799709	1.13171	1.63294	0.442411	1.08119	1.5236	1.82526	0.508249	1.23546	1.74371	2.41021	0.721461	1.61561	2.33707	2.79816	0.873703	1.90071	2.77442	3.11375	0.982564	2.28086	3.26342	3.36054	1.11675
1198.9	1.50453	2.84119	3.52939	4.3944	4.88652	6.32703	7.21107	7.91225	8.44695	8.88587	9.22359	9.54333			1299	0.47777				0.88682	0.242757	0.687803	0.93056	1.23755	0.323432	0.799899	1.12333	1.62487	0.431165	1.08336	1.51452	1.81613	0.495428	1.23946	1.73489	2.39769	0.703681	1.62084	2.32452	2.78345	0.852509	1.90687	2.75938	3.09707	0.958921	2.28824	3.24716	3.34227	1.09031
1199.6	1.49624	2.82293	3.5051	4.36918	4.85959	6.29506	7.17794	7.8759	8.41201	8.85319	9.18756	9.51262			1299.7	0.47321				0.87971	0.236365	0.685852	0.922217	1.22716	0.315042	0.799991	1.11503	1.61679	0.420147	1.0854	1.50554	1.807	0.482863	1.24334	1.72621	2.38524	0.686243	1.62591	2.31215	2.76883	0.831714	1.91284	2.74455	3.08051	0.935716	2.2954	3.23112	3.32408	1.06435
1200.3	1.48594	2.80673	3.48498	4.3431	4.83059	6.25749	7.14003	7.8361	8.36951	8.81252	9.14956	9.47545			1300.4	0.46865				0.87259	0.23011	0.683761	0.913871	1.21677	0.306826	0.799984	1.10681	1.60872	0.409353	1.0873	1.49666	1.79793	0.470552	1.2471	1.71766	2.37282	0.669145	1.63083	2.29997	2.75427	0.811314	1.91862	2.72994	3.06404	0.912946	2.30235	3.21529	3.30598	1.03886
1201	1.47707	2.79126	3.46418	4.32215	4.80507	6.23161	7.10886	7.80728	8.34065	8.78416	9.12011	9.44278			1301.1	0.46408				0.86548	0.22399	0.681531	0.905521	1.20638	0.298784	0.799878	1.09866	1.60073	0.398782	1.08908	1.48786	1.78887	0.458491	1.25074	1.70924	2.36046	0.652382	1.63559	2.28797	2.7397	0.791304	1.92422	2.71553	3.04757	0.890606	2.30907	3.19967	3.28787	1.01385
1201.7	1.47028	2.77843	3.45223	4.30328	4.78961	6.21155	7.08925	7.78753	8.32147	8.76799	9.10332	9.42758			1301.8	0.45952				0.85837	0.218002	0.679164	0.897166	1.19599	0.290911	0.799674	1.09059	1.59277	0.388429	1.09072	1.47915	1.77989	0.446677	1.25426	1.70094	2.34818	0.635951	1.64019	2.27614	2.72523	0.77168	1.92963	2.70131	3.03122	0.868692	2.31556	3.18425	3.26989	0.989292
1202.4	1.46352	2.76312	3.43479	4.28154	4.76541	6.18159	7.05992	7.7589	8.29469	8.73575	9.07612	9.39723			1302.5	0.45496				0.85126	0.212144	0.676662	0.888806	1.1856	0.283207	0.79937	1.08258	1.5849	0.378293	1.09223	1.47053	1.771	0.435107	1.25766	1.69276	2.336	0.619847	1.64463	2.26447	2.71084	0.752438	1.93485	2.68729	3.015	0.847199	2.32182	3.16902	3.25206	0.965199
1203.1	1.45479	2.74916	3.41586	4.26089	4.74351	6.16027	7.03558	7.73215	8.26799	8.70964	9.05107	9.37562			1303.2	0.45039				0.84415	0.206415	0.674025	0.880441	1.17521	0.275669	0.798969	1.07464	1.57714	0.368369	1.09361	1.46198	1.76217	0.423778	1.26092	1.6847	2.32394	0.604067	1.6489	2.25297	2.69662	0.733574	1.93988	2.67346	2.9989	0.826124	2.32786	3.15398	3.23441	0.941562
1203.8	1.44944	2.73716	3.40251	4.24229	4.72498	6.13621	7.01294	7.70903	8.24328	8.6896	9.02818	9.35621			1303.9	0.44583				0.83704	0.200813	0.671256	0.872069	1.16482	0.268294	0.798469	1.06676	1.56946	0.358657	1.09486	1.45351	1.75347	0.412686	1.26407	1.67675	2.31202	0.588608	1.65301	2.24162	2.68255	0.715084	1.94472	2.6598	2.98299	0.80546	2.33366	3.13913	3.21695	0.918376
1204.5	1.44012	2.72396	3.38376	4.22182	4.70111	6.10942	6.98072	7.67715	8.21486	8.65765	9.00119	9.3261			1304.6	0.44126				0.82993	0.195336	0.668356	0.863692	1.15443	0.26108	0.79787	1.05895	1.56183	0.349152	1.09597	1.44512	1.74481	0.401828	1.26709	1.66891	2.30018	0.573463	1.65696	2.23042	2.66858	0.696962	1.94936	2.64633	2.96722	0.785205	2.33924	3.12444	3.19963	0.895636
1205.2	1.43318	2.70957	3.36822	4.20146	4.67843	6.08415	6.95505	7.64892	8.18653	8.62979	8.97429	9.29822			1305.3	0.4367				0.82282	0.189982	0.665328	0.855309	1.1442	0.254024	0.797174	1.0512	1.55429	0.339851	1.09694	1.43679	1.73626	0.391202	1.26998	1.66118	2.2885	0.558631	1.66074	2.21937	2.65474	0.679206	1.95381	2.63302	2.95162	0.765352	2.34457	3.10992	3.1825	0.873338
1205.9	1.42626	2.69588	3.3512	4.18119	4.65801	6.05899	6.92787	7.6243	8.16018	8.60597	8.9454	9.2747			1306	0.43214				0.81571	0.184748	0.662172	0.84692	1.13613	0.247125	0.79638	1.04351	1.54686	0.330752	1.09779	1.42854	1.72785	0.380804	1.27274	1.65354	2.27697	0.544107	1.66435	2.20846	2.64109	0.66181	1.95806	2.61987	2.9362	0.745897	2.34967	3.09557	3.16558	0.851477
1206.6	1.41873	2.6804	3.33426	4.16198	4.63234	6.03115	6.89922	7.59277	8.13205	8.57433	8.91661	9.24698			1306.7	0.42757				0.8086	0.179634	0.65889	0.838525	1.12807	0.24038	0.795489	1.03587	1.53958	0.321852	1.09849	1.42034	1.71957	0.370631	1.27537	1.646	2.26569	0.529887	1.66779	2.19768	2.62776	0.64477	1.96211	2.60688	2.9211	0.726837	2.35453	3.08137	3.149	0.830048
1207.3	1.40767	2.66379	3.3136	4.13809	4.60787	5.99791	6.86436	7.55788	8.09282	8.5369	8.87973	9.21086			1307.4	0.42301				0.80148	0.174638	0.655486	0.830124	1.12	0.233786	0.7945	1.02829	1.53212	0.313148	1.09906	1.41221	1.71157	0.36068	1.27787	1.63855	2.25471	0.515967	1.67107	2.18703	2.61479	0.628081	1.96596	2.59404	2.90646	0.708164	2.35915	3.06732	3.13289	0.809045
1208	1.4012	2.64911	3.2961	4.11718	4.58458	5.97448	6.83754	7.52835	8.06492	8.51138	8.85319	9.18544			1308.1	0.41845				0.79437	0.169756	0.651961	0.821717	1.11193	0.227342	0.793415	1.02076	1.5245	0.304637	1.0995	1.40414	1.70381	0.350947	1.28025	1.63119	2.24406	0.502343	1.67417	2.17651	2.6022	0.611739	1.96961	2.58135	2.89217	0.689876	2.36353	3.05341	3.11719	0.788465
1208.7	1.39091	2.62966	3.27039	4.0879	4.55302	5.93198	6.7936	7.47997	8.01678	8.46253	8.8044	9.12851			1308.8	0.41388				0.78726	0.164989	0.648316	0.813305	1.10386	0.221045	0.792233	1.01328	1.51673	0.296317	1.0998	1.39612	1.69621	0.341429	1.28249	1.62391	2.2336	0.48901	1.6771	2.16611	2.58984	0.595739	1.97306	2.56879	2.87816	0.671966	2.36767	3.03963	3.10181	0.768301
1209.4	1.38166	2.61096	3.24863	4.05976	4.52272	5.89522	6.7515	7.44218	7.97444	8.41977	8.7579	9.08866			1309.5	0.40932				0.78015	0.160332	0.644555	0.804888	1.0958	0.214892	0.790956	1.00585	1.50883	0.288183	1.09997	1.38815	1.68873	0.332123	1.28459	1.61672	2.22336	0.475965	1.67985	2.15582	2.57768	0.580078	1.9763	2.55638	2.86437	0.65443	2.37156	3.02599	3.08669	0.748548
1210.1	1.3693	2.58941	3.22181	4.02439	4.48642	5.85059	6.70656	7.38754	7.92319	8.36373	8.70362	9.03025			1310.2	0.40475				0.77304	0.155786	0.64068	0.796466	1.08773	0.208881	0.789583	0.998464	1.5008	0.280234	1.09999	1.38023	1.68137	0.323026	1.28657	1.6096	2.21324	0.463204	1.68244	2.14564	2.56566	0.564749	1.97934	2.54409	2.85077	0.637264	2.37521	3.01247	3.07173	0.729202
1210.8	1.35863	2.5704	3.19742	3.99669	4.45451	5.813	6.66193	7.34176	7.87227	8.31381	8.65566	8.98049			1310.9	0.40019				0.76593	0.151347	0.636692	0.78804	1.07966	0.203011	0.788115	0.991126	1.49266	0.272466	1.09989	1.37235	1.67414	0.314134	1.28841	1.60255	2.20329	0.450722	1.68485	2.13557	2.55384	0.549749	1.98217	2.53192	2.83738	0.620461	2.37861	2.99907	3.05701	0.710257
1211.5	1.34803	2.55035	3.17468	3.96735	4.42283	5.77298	6.61759	7.29625	7.82708	8.26609	8.60994	8.93511			1311.6	0.39563				0.75882	0.147015	0.632595	0.77961	1.07159	0.197277	0.786553	0.983831	1.48442	0.264876	1.09965	1.36452	1.66705	0.305445	1.29012	1.59556	2.19352	0.438515	1.68708	2.12559	2.54225	0.535074	1.9848	2.51987	2.82425	0.604017	2.38176	2.98578	3.04257	0.691709
1212.2	1.33721	2.53105	3.15283	3.94003	4.39137	5.7306	6.57658	7.25103	7.78037	8.22243	8.56249	8.88792			1312.3	0.39106				0.75171	0.142786	0.62839	0.771177	1.06352	0.19168	0.784897	0.976577	1.47608	0.257463	1.09927	1.35673	1.66007	0.296954	1.29169	1.58865	2.18389	0.42658	1.68914	2.11572	2.53082	0.520717	1.98722	2.50794	2.81125	0.587928	2.38466	2.97259	3.02828	0.673551
1212.9	1.33015	2.51536	3.1304	3.91291	4.36415	5.69377	6.53732	7.21274	7.74105	8.179	8.51726	8.84504			1313	0.3865				0.7446	0.13866	0.624081	0.762741	1.05546	0.186215	0.783148	0.969363	1.46768	0.250221	1.09875	1.34897	1.65316	0.28866	1.29313	1.58179	2.17436	0.414912	1.69102	2.10593	2.51952	0.506675	1.98943	2.49611	2.79841	0.572187	2.38732	2.9595	3.01416	0.655778
1213.6	1.32008	2.49632	3.10885	3.88776	4.33411	5.65718	6.4998	7.17133	7.69839	8.13767	8.47423	8.80238			1313.7	0.38194				0.73749	0.134635	0.619669	0.754304	1.04739	0.18088	0.781306	0.962187	1.45924	0.24315	1.0981	1.34125	1.64635	0.280558	1.29443	1.57499	2.16495	0.403507	1.69272	2.09623	2.50834	0.492944	1.99143	2.48438	2.78574	0.556791	2.38972	2.94651	3.0002	0.638386
1214.3	1.30948	2.48028	3.08816	3.86189	4.30725	5.62341	6.46249	7.13346	7.65773	8.09282	8.43335	8.75992			1314.4	0.37737				0.73037	0.130708	0.615158	0.745866	1.03932	0.175674	0.779373	0.955047	1.45077	0.236246	1.09732	1.33357	1.63958	0.272646	1.2956	1.56824	2.15562	0.392361	1.69425	2.08661	2.49725	0.479518	1.99323	2.47275	2.77312	0.541733	2.39188	2.93361	2.98634	0.621369
1215	1.30377	2.46547	3.0669	3.83972	4.27957	5.59371	6.42836	7.09578	7.61904	8.05564	8.39267	8.71967			1315.1	0.37281				0.72326	0.126878	0.61055	0.737428	1.03125	0.170595	0.777348	0.947942	1.44226	0.229506	1.0964	1.32591	1.63291	0.26492	1.29663	1.56155	2.14639	0.38147	1.69559	2.07706	2.4863	0.466392	1.99481	2.46121	2.76067	0.52701	2.39378	2.92079	2.97263	0.604721
1215.7	1.293	2.44625	3.04789	3.81329	4.25305	5.55904	6.39146	7.05667	7.58054	8.01678	8.35411	8.6816			1315.8	0.36825				0.71615	0.123143	0.605847	0.72899	1.02319	0.165639	0.775233	0.940871	1.43373	0.222927	1.09535	1.31828	1.62634	0.257377	1.29752	1.5549	2.1373	0.37083	1.69676	2.06759	2.47552	0.453563	1.99619	2.44975	2.74838	0.512615	2.39543	2.90804	2.95914	0.588437
1216.4	1.28529	2.43332	3.0304	3.79315	4.22766	5.52968	6.3577	7.02263	7.54397	7.97995	8.31955	8.64371			1316.5	0.36368				0.70904	0.119502	0.601053	0.720554	1.01512	0.160804	0.773028	0.933832	1.42516	0.216507	1.09416	1.31067	1.61985	0.250014	1.29828	1.54829	2.12831	0.360436	1.69775	2.05819	2.46484	0.441026	1.99735	2.43838	2.73623	0.498544	2.39682	2.89537	2.9458	0.572513
1217.1	1.27644	2.41713	3.00677	3.76357	4.19952	5.49288	6.3183	6.98072	7.5024	7.93597	8.27561	8.60003			1317.2	0.35912				0.70193	0.115952	0.596169	0.712121	1.00705	0.15609	0.770734	0.926823	1.41657	0.210242	1.09284	1.30308	1.6134	0.242828	1.2989	1.54173	2.11937	0.350285	1.69856	2.04884	2.4542	0.428775	1.99831	2.42708	2.72415	0.484792	2.39797	2.88276	2.93254	0.556942
1217.8	1.26707	2.39773	2.98882	3.74024	4.16965	5.46009	6.28058	6.94065	7.46105	7.89587	8.2319	8.55855			1317.9	0.35504				0.69482	0.112492	0.5912	0.703692	0.99898	0.151492	0.768352	0.919844	1.40796	0.20413	1.09139	1.29552	1.6069	0.235816	1.29938	1.5352	2.11039	0.340372	1.69919	2.03956	2.44352	0.416807	1.99905	2.41585	2.71202	0.471354	2.39886	2.87021	2.91921	0.541719
1218.5	1.26038	2.38616	2.97235	3.7222	4.1505	5.43626	6.25317	6.91353	7.43019	7.86502	8.20163	8.52707			1318.6	0.35205				0.68771	0.10912	0.586148	0.695267	0.99092	0.147009	0.765883	0.912892	1.39932	0.198169	1.0898	1.28797	1.60044	0.228974	1.29972	1.5287	2.10145	0.330694	1.69964	2.03033	2.43289	0.405117	1.99958	2.40469	2.69995	0.458225	2.39949	2.85772	2.90597	0.526838
1219.2	1.25112	2.36865	2.95053	3.69488	4.12192	5.39883	6.21584	6.87227	7.38924	7.81988	8.15643	8.48399			1319.3	0.34906				0.6806	0.105834	0.581015	0.686849	0.98285	0.142639	0.763327	0.905966	1.39052	0.192354	1.08808	1.28043	1.59407	0.2223	1.29993	1.52223	2.09264	0.321247	1.69991	2.02116	2.42242	0.3937	1.99989	2.39359	2.68803	0.445399	2.39987	2.84527	2.89286	0.512296
1219.9	1.24308	2.35451	2.93292	3.67113	4.09638	5.36661	6.17874	6.83597	7.35021	7.78037	8.11708	8.44306			1320	0.34607				0.67349	0.102633	0.575804	0.678437	0.97478	0.13838	0.760686	0.899066	1.38152	0.186685	1.08623	1.27291	1.58768	0.215791	1.3	1.51579	2.08381	0.312026	1.7	2.01203	2.41193	0.382551	2	2.38255	2.67611	0.432873	2.4	2.83287	2.87977	0.498085
1220.6	1.23623	2.34045	2.91608	3.65342	4.07568	5.34195	6.15177	6.80613	7.31813	7.75175	8.08537	8.41201			1320.7	0.34308				0.66638	0.099515	0.570519	0.670034	0.96671	0.134229	0.757961	0.89219	1.37235	0.181157	1.08425	1.26541	1.58129	0.209443	1.29993	1.50937	2.07498	0.303027	1.69991	2.00294	2.40142	0.371666	1.99989	2.37156	2.66418	0.42064	2.39987	2.82051	2.86667	0.484202
1221.3	1.22942	2.32541	2.89734	3.62827	4.05042	5.30884	6.11646	6.76706	7.27947	7.70903	8.04637	8.36951			1321.4	0.34009				0.65926	0.0964783	0.565163	0.661641	0.95865	0.130185	0.755152	0.885337	1.363	0.175769	1.08214	1.25791	1.57481	0.203254	1.29972	1.50298	2.06605	0.294248	1.69964	1.99389	2.39081	0.361041	1.99958	2.36062	2.65213	0.408696	2.39949	2.80819	2.85345	0.47064
1222	1.22096	2.31153	2.88005	3.60662	4.02717	5.27959	6.08415	6.73132	7.24603	7.67361	8.0094	8.33681			1322.1	0.3371				0.65215	0.0935212	0.559737	0.653258	0.95058	0.126245	0.752261	0.878506	1.35349	0.170517	1.0799	1.25041	1.56846	0.19722	1.29938	1.4966	2.0572	0.285683	1.69919	1.98487	2.3803	0.350671	1.99905	2.34972	2.64022	0.397035	2.39886	2.79589	2.84038	0.457394
1222.7	1.21171	2.29509	2.86022	3.58179	3.99853	5.24445	6.04505	6.69114	7.20112	7.62957	7.96526	8.28896			1322.8	0.33412				0.64504	0.0906422	0.554246	0.644888	0.94251	0.122407	0.749289	0.871696	1.34384	0.165399	1.07753	1.24293	1.56195	0.191338	1.2989	1.49024	2.0485	0.277328	1.69856	1.97589	2.36996	0.340551	1.99831	2.33886	2.62849	0.385654	2.39797	2.78362	2.82751	0.444459
1223.4	1.20393	2.27982	2.8425	3.56041	3.97558	5.21435	6.01035	6.65733	7.16638	7.59451	7.92684	8.25087			1323.5	0.33113				0.63793	0.0878396	0.548692	0.636531	0.93444	0.118669	0.746236	0.864905	1.33404	0.160412	1.07503	1.23544	1.55525	0.185606	1.29828	1.48389	2.03985	0.269181	1.69775	1.96693	2.35969	0.330678	1.99735	2.32803	2.61683	0.374548	2.39682	2.77137	2.81474	0.43183
1224.1	1.19509	2.2636	2.82098	3.53427	3.94639	5.17845	5.9731	6.61302	7.12197	7.54745	7.87952	8.20352			1324.2	0.32814				0.63082	0.0851118	0.543078	0.628189	0.92637	0.11503	0.743103	0.858133	1.32411	0.155554	1.07241	1.22796	1.54839	0.180021	1.29752	1.47754	2.03114	0.261236	1.69676	1.958	2.34935	0.321046	1.99619	2.31723	2.6051	0.36371	2.39543	2.75914	2.80188	0.419502
1224.8	1.18659	2.24543	2.79834	3.50833	3.91832	5.14162	5.93198	6.57052	7.07294	7.50067	7.83069	8.15455			1324.9	0.32515				0.62371	0.0824573	0.537407	0.619864	0.91831	0.111487	0.739893	0.851379	1.31404	0.150822	1.06966	1.22048	1.54136	0.17458	1.29663	1.47121	2.02251	0.253491	1.69559	1.94908	2.33907	0.311651	1.99481	2.30647	2.59342	0.353137	2.39378	2.74691	2.78907	0.407469
1225.5	1.17842	2.22998	2.77907	3.48418	3.89135	5.10975	5.89794	6.53431	7.0372	7.45933	7.78753	8.11148			1325.6	0.32216				0.6166	0.0798744	0.531682	0.611556	0.91024	0.108037	0.736605	0.844642	1.30386	0.146214	1.06679	1.213	1.53418	0.169279	1.2956	1.46488	2.01377	0.245941	1.69425	1.94019	2.3291	0.302489	1.99323	2.29572	2.58198	0.342824	2.39188	2.7347	2.77629	0.395726
1226.2	1.16896	2.21259	2.75804	3.45462	3.86011	5.06991	5.85059	6.48187	6.98393	7.40457	7.73571	8.05935			1326.3	0.31917				0.60949	0.0773617	0.525906	0.603268	0.90217	0.10468	0.733242	0.837922	1.29355	0.141727	1.06379	1.20552	1.52685	0.164117	1.29443	1.45855	2.00492	0.238583	1.69272	1.9313	2.31887	0.293556	1.99143	2.28499	2.57026	0.332765	2.38972	2.72249	2.76387	0.384268
1226.9	1.16038	2.19533	2.73401	3.43005	3.83178	5.03385	5.80898	6.44021	6.93585	7.35868	7.68599	8.00387			1327	0.31618				0.60238	0.0749177	0.520083	0.595001	0.8941	0.101413	0.729803	0.831217	1.28312	0.137359	1.06067	1.19803	1.51938	0.15909	1.29313	1.45222	1.99597	0.231413	1.69102	1.92243	2.3084	0.284847	1.98943	2.27428	2.5583	0.322957	2.38732	2.71027	2.75155	0.37309
1227.6	1.14974	2.17821	2.71269	3.40173	3.80102	4.99689	5.76899	6.39293	6.8897	7.30634	7.6366	7.95426			1327.7	0.31319				0.59527	0.0725407	0.514215	0.586755	0.88604	0.0982348	0.726291	0.824526	1.27259	0.133106	1.05743	1.19054	1.51179	0.154195	1.29169	1.44589	1.98693	0.224427	1.68914	1.91356	2.2977	0.276357	1.98722	2.26358	2.54611	0.313394	2.38466	2.69806	2.73943	0.362186
1228.3	1.1413	2.16023	2.69215	3.37443	3.77138	4.95793	5.724	6.34892	6.84069	7.25772	7.58228	7.90133			1328.4	0.3102				0.58815	0.0702294	0.508304	0.578534	0.87797	0.0951427	0.722707	0.81785	1.26195	0.128968	1.05407	1.18304	1.50407	0.149431	1.29012	1.43955	1.97776	0.217622	1.68708	1.9047	2.28679	0.268084	1.9848	2.25288	2.53381	0.304072	2.38176	2.68583	2.7272	0.351553
1229	1.13084	2.1419	2.66993	3.34811	3.74197	4.91926	5.6846	6.30231	6.7936	7.2061	7.53356	7.84874			1329.1	0.30721				0.58104	0.0679823	0.502355	0.570337	0.86884	0.092135	0.719052	0.811187	1.25121	0.12494	1.05059	1.17553	1.49614	0.144793	1.28841	1.4332	1.96828	0.210994	1.68485	1.89584	2.27571	0.260022	1.98217	2.24219	2.5214	0.294987	2.37861	2.67359	2.71483	0.341184
1229.7	1.12202	2.12324	2.64789	3.32124	3.71108	4.8809	5.63897	6.25461	6.74217	7.15319	7.47997	7.79471			1329.8	0.30423				0.57393	0.065798	0.49637	0.562168	0.8588	0.08921	0.715327	0.804537	1.24039	0.121022	1.04699	1.16802	1.48795	0.14028	1.28657	1.42685	1.95849	0.204539	1.68244	1.88698	2.26447	0.252168	1.97934	2.23151	2.5089	0.286133	2.37521	2.66134	2.70203	0.331075
1230.4	1.11327	2.10523	2.62482	3.29079	3.67875	4.84061	5.59371	6.20297	6.6896	7.10068	7.42335	7.73927			1330.5	0.30124				0.56682	0.063675	0.490352	0.554027	0.84876	0.0863659	0.711533	0.797899	1.22947	0.11721	1.04328	1.16049	1.47953	0.135889	1.28459	1.42048	1.94841	0.198254	1.67985	1.87811	2.25308	0.244516	1.9763	2.22081	2.49628	0.277506	2.37156	2.64906	2.68892	0.321221
1231.1	1.10484	2.08785	2.60315	3.26362	3.65006	4.80286	5.55137	6.16027	6.64049	7.0518	7.37225	7.68599			1331.2	0.29825				0.55971	0.0616119	0.484304	0.545916	0.83871	0.0836008	0.707672	0.791273	1.21857	0.113503	1.03945	1.15295	1.47088	0.131617	1.28249	1.4141	1.93803	0.192136	1.6771	1.86923	2.24155	0.237064	1.97306	2.21012	2.48337	0.269102	2.36767	2.63677	2.67553	0.311617
1231.8	1.09144	2.0649	2.57395	3.23073	3.60994	4.75226	5.49541	6.09818	6.57506	6.98232	7.3013	7.61027			1331.9	0.29526				0.5526	0.0596074	0.478228	0.537836	0.82867	0.0809131	0.703746	0.784659	1.20776	0.109897	1.03551	1.1454	1.46201	0.127461	1.28025	1.40771	1.92723	0.18618	1.67417	1.86035	2.22971	0.229808	1.96961	2.19942	2.47015	0.260916	2.36353	2.62445	2.66188	0.302258
1232.5	1.08044	2.04409	2.54918	3.19742	3.57355	4.70652	5.44252	6.03949	6.51328	6.91672	7.23602	7.54223			1332.6	0.29227				0.54549	0.0576601	0.472129	0.529789	0.81863	0.0783008	0.699754	0.778055	1.19704	0.106391	1.03145	1.13784	1.45294	0.123419	1.27787	1.40129	1.916	0.180384	1.67107	1.85145	2.21738	0.222742	1.96596	2.1887	2.45665	0.252944	2.35915	2.6121	2.64801	0.293139
1233.2	1.07078	2.02349	2.52348	3.16446	3.53753	4.65908	5.39014	5.98274	6.45506	6.8533	7.16968	7.47653			1333.3	0.28928				0.53838	0.0557686	0.466008	0.521777	0.80858	0.0757623	0.6957	0.771462	1.1864	0.102983	1.02728	1.13027	1.4437	0.119489	1.27537	1.39486	1.90438	0.174744	1.66779	1.84254	2.20461	0.215863	1.96211	2.17797	2.44293	0.245182	2.35453	2.59971	2.63397	0.284256
1233.9	1.05877	2.00263	2.49632	3.13184	3.50348	4.61424	5.33949	5.92652	6.3944	6.79047	7.10068	7.40798			1334	0.28629				0.53127	0.0539317	0.459869	0.513801	0.79854	0.073296	0.691583	0.764879	1.17583	0.0996703	1.02301	1.12268	1.43431	0.115668	1.27274	1.38841	1.89242	0.169257	1.66435	1.83361	2.1915	0.209168	1.95806	2.16723	2.42909	0.237625	2.34967	2.58729	2.61974	0.275604
1234.6	1.04978	1.98381	2.47343	3.10313	3.47056	4.57404	5.29298	5.87625	6.34162	6.73597	7.04855	7.35191			1334.7	0.2833				0.52451	0.052148	0.453714	0.505862	0.7885	0.0709	0.687406	0.758306	1.16534	0.0964505	1.01862	1.11508	1.42478	0.111954	1.26998	1.38193	1.88022	0.16392	1.66074	1.82466	2.17811	0.202653	1.95381	2.15646	2.41513	0.230268	2.34457	2.57484	2.60535	0.267178
1235.3	1.0404	1.96517	2.45019	3.07468	3.43716	4.53211	5.24445	5.82505	6.28637	6.67882	6.98876	7.28786			1335.4	0.28031				0.51801	0.0504164	0.447546	0.497963	0.77846	0.0685729	0.68317	0.751743	1.15492	0.0933218	1.01413	1.10746	1.41512	0.108344	1.26709	1.37543	1.86779	0.158728	1.65696	1.81569	2.16446	0.196313	1.94936	2.14568	2.40105	0.223109	2.33924	2.56234	2.59079	0.258973
1236	1.0292	1.94581	2.42605	3.04439	3.40408	4.48849	5.19637	5.77165	6.22874	6.61759	6.92628	7.22603			1336.1	0.27732				0.51152	0.0487354	0.441369	0.490104	0.76841	0.0663129	0.678876	0.745189	1.14456	0.0902821	1.00954	1.09982	1.40532	0.104836	1.26407	1.3689	1.85515	0.15368	1.65301	1.80669	2.15055	0.190145	1.94472	2.13487	2.38685	0.216142	2.33366	2.54981	2.57607	0.250986
1236.7	1.01953	1.92797	2.4027	3.01648	3.3721	4.44734	5.14754	5.72137	6.17305	6.55994	6.86752	7.16473			1336.8	0.27434				0.50502	0.047104	0.435184	0.482287	0.75837	0.0641185	0.674526	0.738644	1.13427	0.0873291	1.00484	1.09217	1.39541	0.101427	1.26092	1.36235	1.84231	0.148772	1.6489	1.79767	2.13642	0.184145	1.93988	2.12403	2.3725	0.209363	2.32786	2.53722	2.56118	0.243211
1237.4	1.00898	1.9081	2.37848	2.9847	3.33964	4.40352	5.098	5.6637	6.11505	6.4998	6.80613	7.10068			1337.5	0.27135				0.49853	0.0455208	0.428994	0.474515	0.74833	0.0619881	0.67012	0.732109	1.12404	0.0844611	1.00004	1.0845	1.38538	0.0981154	1.25766	1.35577	1.82928	0.144	1.64463	1.78863	2.12211	0.178309	1.93485	2.11316	2.358	0.202769	2.32182	2.52459	2.54614	0.235644
1238.1	1.00099	1.88843	2.35396	2.95257	3.30141	4.35813	5.04545	5.6079	6.0548	6.43576	6.73907	7.03072			1338.2	0.26836				0.49203	0.0439847	0.422802	0.466787	0.73828	0.0599202	0.665662	0.725582	1.11386	0.0816759	0.995141	1.07682	1.37525	0.0948987	1.25426	1.34916	1.81623	0.139362	1.64019	1.77955	2.10778	0.172635	1.92963	2.10227	2.34336	0.196355	2.31556	2.51191	2.53095	0.228281
1238.8	0.993	1.8681	2.32863	2.92483	3.26964	4.31618	4.99689	5.5552	5.99929	6.37823	6.67729	6.96947			1338.9	0.26528				0.48553	0.0424946	0.416612	0.459106	0.72824	0.0579132	0.661152	0.719065	1.10374	0.0789715	0.990142	1.06911	1.36516	0.0917748	1.25074	1.34252	1.80322	0.134855	1.63559	1.77044	2.09343	0.167118	1.92422	2.09134	2.32859	0.190118	2.30907	2.49918	2.51561	0.221118
1239.5	0.98502	1.84969	2.30569	2.89334	3.23519	4.27169	4.94766	5.50174	5.94155	6.31393	6.6115	6.90558			1339.6	0.26197				0.47904	0.0410492	0.410424	0.451474	0.7182	0.0559656	0.656591	0.712556	1.09367	0.0763461	0.985048	1.06139	1.35512	0.0887413	1.2471	1.33585	1.79027	0.130475	1.63083	1.7613	2.0791	0.161755	1.91862	2.08038	2.31373	0.184053	2.30235	2.4864	2.50016	0.214149
1240.2	0.97703	1.83105	2.28139	2.86352	3.20332	4.22766	4.89892	5.44628	5.88166	6.25317	6.55089	6.83754			1340.3	0.25867				0.47254	0.0396475	0.404243	0.44389	0.70816	0.054076	0.651981	0.706057	1.08364	0.0737977	0.979858	1.05366	1.34514	0.0857962	1.24334	1.32914	1.77736	0.12622	1.62591	1.75213	2.06481	0.156542	1.91284	2.06938	2.29886	0.178157	2.2954	2.47356	2.48469	0.207371
1240.9	0.96904	1.81259	2.26048	2.83596	3.17176	4.18986	4.854	5.39635	5.83042	6.20012	6.49232	6.7811			1341	0.25537				0.46605	0.0382883	0.39807	0.436358	0.69811	0.0522429	0.647323	0.699566	1.07366	0.0713244	0.974576	1.0459	1.3352	0.0829373	1.23946	1.3224	1.76449	0.122087	1.62084	1.74292	2.05055	0.151476	1.90687	2.05834	2.28401	0.172425	2.28824	2.46066	2.46923	0.20078
1241.6	0.96106	1.79763	2.23924	2.81125	3.14485	4.15336	4.81393	5.3518	5.78229	6.15035	6.44021	6.72667			1341.7	0.25206				0.45955	0.0369706	0.391908	0.428878	0.68807	0.050465	0.642619	0.693084	1.06374	0.0689245	0.969202	1.03813	1.32531	0.0801625	1.23546	1.31563	1.75166	0.118073	1.61561	1.73368	2.03633	0.146553	1.90071	2.04727	2.26916	0.166855	2.28086	2.44771	2.45376	0.194371
1242.3	0.95307	1.78197	2.22075	2.78869	3.12033	4.12098	4.77529	5.31129	5.7372	6.1038	6.3944	6.67575			1342.4	0.24876				0.45306	0.0356933	0.385759	0.421452	0.67803	0.0487408	0.637871	0.686612	1.05388	0.066596	0.963739	1.03034	1.31547	0.0774698	1.23135	1.30882	1.73887	0.114175	1.61022	1.7244	2.02215	0.141771	1.89438	2.03615	2.25433	0.161443	2.27325	2.4347	2.43829	0.188141
1243	0.94508	1.76726	2.20496	2.76503	3.09386	4.0879	4.74024	5.27351	5.69639	6.05759	6.35038	6.62979			1343.1	0.24546				0.44656	0.0344553	0.379626	0.414081	0.66798	0.0470689	0.63308	0.680149	1.0441	0.0643373	0.958189	1.02253	1.30567	0.0748571	1.22711	1.30197	1.72612	0.11039	1.60469	1.71508	2.008	0.137126	1.88787	2.02499	2.2395	0.156184	2.26544	2.42162	2.42281	0.182085
1243.7	0.9371	1.75469	2.18726	2.74663	3.07326	4.05976	4.7076	5.23721	5.65979	6.02005	6.30812	6.59022			1343.8	0.24215				0.44007	0.0332556	0.373511	0.406766	0.65794	0.0454481	0.628247	0.673695	1.03437	0.0621465	0.952552	1.0147	1.29591	0.0723225	1.22276	1.29509	1.71344	0.106716	1.599	1.70572	1.99389	0.132615	1.88118	2.01379	2.22469	0.151076	2.25741	2.40849	2.40733	0.176199
1244.4	0.92911	1.74181	2.1712	2.72584	3.0493	4.02903	4.67305	5.19876	5.61694	5.97585	6.26325	6.54335			1344.5	0.23885				0.43357	0.0320933	0.367416	0.399509	0.6479	0.043877	0.623374	0.667251	1.02469	0.060022	0.946832	1.00685	1.28619	0.069864	1.2183	1.28817	1.70084	0.103149	1.59316	1.69631	1.97984	0.128234	1.87431	2.00255	2.20988	0.146114	2.24917	2.39529	2.39185	0.17048
1245.1	0.92112	1.72783	2.15427	2.7052	3.02552	3.99945	4.63874	5.16297	5.57956	5.93472	6.22014	6.4983			1345.2	0.23555				0.42707	0.0309672	0.361344	0.392311	0.63873	0.0423544	0.618463	0.660817	1.01507	0.057962	0.941031	0.998993	1.2765	0.0674797	1.21373	1.28121	1.68831	0.0996885	1.58718	1.68687	1.96584	0.12398	1.86727	1.99125	2.19508	0.141296	2.24073	2.38202	2.37638	0.164924
1245.8	0.91314	1.71356	2.13649	2.68349	3.00193	3.96917	4.60469	5.12389	5.53988	5.89386	6.1759	6.45208			1345.9	0.23224				0.42058	0.0298765	0.355297	0.385173	0.63024	0.0408788	0.613514	0.654393	1.0055	0.055965	0.935149	0.991114	1.26685	0.0651676	1.20904	1.27421	1.67584	0.0963303	1.58106	1.67739	1.9519	0.119852	1.86007	1.97992	2.18029	0.136617	2.23208	2.3687	2.36095	0.159526
1246.5	0.90515	1.70059	2.1208	2.66256	2.97852	3.93822	4.56878	5.08745	5.49667	5.84925	6.13479	6.40914			1346.6	0.22894				0.41408	0.0288202	0.349276	0.378097	0.62174	0.0394492	0.60853	0.647979	0.99597	0.0540293	0.929189	0.983219	1.25724	0.0629261	1.20425	1.26717	1.66344	0.0930723	1.57478	1.66786	1.938	0.115844	1.85269	1.96853	2.16555	0.132075	2.22323	2.3553	2.34554	0.154284
1247.2	0.89716	1.68772	2.10184	2.63998	2.95393	3.90661	4.53419	5.04545	5.45381	5.80363	6.08555	6.35916			1347.3	0.22564				0.40759	0.0277974	0.343285	0.371082	0.61325	0.0380643	0.603512	0.641576	0.98648	0.0521532	0.923154	0.975307	1.24768	0.0607532	1.19934	1.2601	1.65108	0.089912	1.56837	1.65829	1.92416	0.111955	1.84514	1.9571	2.15085	0.127667	2.21417	2.34184	2.33017	0.149193
1247.9	0.88918	1.67494	2.08641	2.6218	2.93359	3.87972	4.50091	5.00956	5.41627	5.76368	6.04366	6.3183			1348	0.22234				0.40109	0.0268072	0.337325	0.364132	0.60475	0.036723	0.598462	0.635185	0.97703	0.0503354	0.917044	0.96738	1.23817	0.0586472	1.19433	1.25298	1.63879	0.0868469	1.56182	1.64867	1.91036	0.108181	1.83744	1.94562	2.13619	0.123388	2.20493	2.32831	2.31482	0.14425
1248.6	0.88119	1.66112	2.07062	2.60076	2.91005	3.85035	4.46684	4.97279	5.37898	5.72269	6.00067	6.27191			1348.7	0.21903				0.3946	0.0258487	0.331397	0.357246	0.59625	0.0354239	0.59338	0.628804	0.96761	0.0485741	0.910863	0.959437	1.22869	0.0566063	1.18922	1.24583	1.62654	0.0838747	1.55513	1.63901	1.89662	0.104521	1.82957	1.93409	2.12158	0.119236	2.19548	2.31472	2.2995	0.139452
1249.3	0.8732	1.64892	2.05684	2.58048	2.88868	3.82296	4.43711	4.93856	5.33949	5.6846	5.96074	6.22874			1349.4	0.21573				0.3881	0.0249209	0.325505	0.350426	0.58776	0.0341661	0.588269	0.622435	0.95822	0.0468679	0.904611	0.951479	1.21925	0.0546289	1.184	1.23863	1.61433	0.0809929	1.54831	1.6293	1.88293	0.10097	1.82154	1.92251	2.107	0.115208	2.18585	2.30106	2.2842	0.134795
1250	0.86522	1.63757	2.04127	2.56212	2.86748	3.7949	4.40453	4.90343	5.30274	5.64547	5.92107	6.18728			1350.1	0.21243				0.3816	0.0240231	0.319649	0.343672	0.57926	0.0329483	0.58313	0.616078	0.94886	0.0452154	0.898291	0.943507	1.20984	0.0527132	1.17868	1.23139	1.60216	0.0781993	1.54135	1.61955	1.86927	0.0975256	1.81336	1.91088	2.09245	0.111301	2.17603	2.28733	2.26896	0.130274
1250.7	0.85723	1.62855	2.02908	2.548	2.85167	3.77311	4.38026	4.87865	5.27473	5.61565	5.88844	6.15602			1350.8	0.20912				0.37511	0.0231545	0.313832	0.336987	0.57077	0.0317696	0.577964	0.609734	0.93951	0.0436151	0.891906	0.935521	1.20046	0.0508576	1.17326	1.22412	1.59003	0.0754915	1.53426	1.60975	1.85566	0.094186	1.80502	1.8992	2.07793	0.107511	2.16602	2.27353	2.25375	0.125888
1251.4	0.84924	1.61696	2.01419	2.52872	2.83074	3.74714	4.35111	4.84507	5.24083	5.57828	5.85194	6.11646			1351.5	0.20582				0.36861	0.0223141	0.308055	0.33037	0.56227	0.0306287	0.572774	0.603403	0.93019	0.0420656	0.885456	0.927522	1.1911	0.0490605	1.16774	1.2168	1.57793	0.0728673	1.52705	1.59991	1.84207	0.0909481	1.79652	1.88747	2.06342	0.103835	2.15583	2.25966	2.23857	0.121633
1252.1	0.84126	1.60657	2.00124	2.51131	2.8119	3.72049	4.32016	4.81172	5.20475	5.54243	5.81433	6.07855			1352.2	0.20252				0.36212	0.0215013	0.302321	0.323822	0.55377	0.0295247	0.56756	0.597085	0.92087	0.0405654	0.878945	0.91951	1.18177	0.0473203	1.16212	1.20944	1.56585	0.0703246	1.5197	1.59003	1.82851	0.0878094	1.78788	1.87569	2.04894	0.100272	2.14546	2.24573	2.22343	0.117505
1252.8	0.83327	1.59625	1.98747	2.49689	2.79383	3.69743	4.2924	4.78189	5.17249	5.50808	5.77963	6.04088			1352.9	0.19921				0.35562	0.0207152	0.29663	0.317345	0.54528	0.0284566	0.562324	0.590781	0.91157	0.0391134	0.872373	0.911487	1.17245	0.0456356	1.15641	1.20205	1.55381	0.0678612	1.51223	1.58009	1.81498	0.0847671	1.77909	1.86386	2.03447	0.0968171	2.13491	2.23173	2.20831	0.113502
1253.5	0.82528	1.58343	1.97288	2.47742	2.77204	3.67113	4.26285	4.75007	5.13689	5.47016	5.73984	6.00067			1353.6	0.19591				0.34913	0.0199551	0.290984	0.310939	0.53678	0.0274232	0.557068	0.584491	0.90227	0.0377081	0.865744	0.903452	1.16315	0.0440046	1.15061	1.19461	1.54178	0.065475	1.50464	1.57011	1.80147	0.0818189	1.77016	1.85198	2.02002	0.0934684	2.12419	2.21766	2.1932	0.10962
1254.2	0.8173	1.57217	1.95704	2.45697	2.75106	3.6425	4.23058	4.71194	5.098	5.43	5.69639	5.95662			1354.3	0.19261				0.34263	0.0192201	0.285385	0.304605	0.52828	0.0264238	0.551792	0.578216	0.89298	0.0363482	0.85906	0.895408	1.15386	0.0424261	1.14471	1.18713	1.52978	0.0631639	1.49692	1.56009	1.78797	0.0789623	1.76109	1.84005	2.00558	0.0902229	2.11331	2.20353	2.17812	0.105855
1254.9	0.80931	1.56027	1.94044	2.43725	2.72709	3.61327	4.19662	4.67412	5.05941	5.38642	5.65327	5.91153			1355	0.1893				0.33614	0.0185097	0.279834	0.298344	0.51979	0.0254572	0.546499	0.571957	0.88369	0.0350325	0.852321	0.887354	1.14458	0.0408985	1.13872	1.17962	1.51778	0.0609259	1.48909	1.55002	1.77448	0.0761948	1.75187	1.82807	1.99114	0.0870781	2.10225	2.18933	2.16303	0.102206
1255.6	0.80132	1.54882	1.92797	2.42103	2.70957	3.58922	4.16869	4.64408	5.02343	5.35303	5.61565	5.87219			1355.7	0.186				0.32964	0.0178231	0.274333	0.292156	0.51129	0.0245225	0.541191	0.565713	0.87442	0.0337597	0.845531	0.879291	1.1353	0.0394204	1.13264	1.17206	1.5058	0.0587591	1.48115	1.5399	1.76101	0.0735141	1.74252	1.81604	1.97672	0.0840311	2.09103	2.17506	2.14798	0.0986691
1256.3	0.79334	1.53568	1.91249	2.4016	2.68782	3.55877	4.13333	4.60575	4.9831	5.31007	5.57186	5.8264			1356.4	0.1827				0.32314	0.0171595	0.268883	0.286042	0.5028	0.0236189	0.535867	0.559486	0.86517	0.0325286	0.838692	0.871221	1.12603	0.0379905	1.12648	1.16447	1.49383	0.0566614	1.47308	1.52975	1.74756	0.0709178	1.73304	1.80396	1.96231	0.0810795	2.07965	2.16073	2.13295	0.0952412
1257	0.78535	1.52195	1.8954	2.38122	2.66502	3.53021	4.10015	4.56878	4.94425	5.26623	5.52841	5.78229			1357.1	0.17939				0.31665	0.0165183	0.263485	0.280003	0.4943	0.0227455	0.53053	0.553276	0.85595	0.0313381	0.831805	0.863143	1.11676	0.0366073	1.12023	1.15683	1.48187	0.054631	1.46491	1.51954	1.73412	0.0684037	1.72343	1.79183	1.94793	0.0782207	2.06811	2.14633	2.11795	0.0919196
1257.7	0.77736	1.51112	1.88062	2.36102	2.64302	3.50268	4.06912	4.53524	4.90456	5.22637	5.48656	5.7372			1357.8	0.17609				0.31015	0.0158989	0.25814	0.274039	0.4858	0.0219013	0.525182	0.547083	0.84675	0.030187	0.824873	0.85506	1.10749	0.0352696	1.11389	1.14916	1.46994	0.052666	1.45663	1.5093	1.72071	0.0659696	1.71368	1.77965	1.93356	0.0754523	2.05642	2.13187	2.10298	0.0887015
1258.4	0.76938	1.50176	1.86896	2.34639	2.62845	3.48017	4.04297	4.50609	4.87641	5.19637	5.45507	5.70296			1358.5	0.17279				0.30366	0.0153006	0.25285	0.268151	0.47731	0.0210854	0.519823	0.540909	0.83757	0.0290741	0.817898	0.846972	1.09824	0.0339761	1.10748	1.14146	1.45802	0.0507647	1.44824	1.49901	1.70731	0.0636133	1.70381	1.76743	1.91922	0.0727716	2.04458	2.11735	2.08804	0.0855841
1259.1	0.76139	1.4897	1.85439	2.32809	2.60675	3.45382	4.01144	4.47198	4.83838	5.15466	5.41253	5.66109			1359.2	0.16949				0.29716	0.0147228	0.247616	0.262339	0.46881	0.0202972	0.514456	0.534753	0.82842	0.0279983	0.810882	0.83888	1.08898	0.0327255	1.10098	1.13371	1.44611	0.0489252	1.43975	1.48867	1.69393	0.0613325	1.69382	1.75516	1.90489	0.0701765	2.03259	2.10276	2.07313	0.0825649
1259.8	0.7534	1.47945	1.8395	2.31047	2.58643	3.42847	3.98199	4.43813	4.80286	5.11682	5.37155	5.61824			1359.9	0.16618				0.29067	0.0141648	0.242439	0.256603	0.46109	0.0195357	0.509081	0.528617	0.8193	0.0269586	0.803826	0.830785	1.07974	0.0315165	1.09441	1.12593	1.43423	0.0471458	1.43116	1.4783	1.68057	0.0591254	1.68371	1.74284	1.8906	0.0676645	2.02045	2.08812	2.05825	0.0796411
1260.5	0.74542	1.46791	1.82684	2.29509	2.56744	3.40173	3.95549	4.40859	4.7698	5.08394	5.33703	5.58213			1360.6	0.16288				0.28417	0.0136261	0.237319	0.250945	0.45531	0.0188002	0.5037	0.5225	0.8102	0.0259539	0.796734	0.822688	1.0705	0.0303479	1.08776	1.11811	1.42236	0.0454248	1.42246	1.46789	1.66724	0.0569897	1.67348	1.73047	1.87632	0.0652334	2.00818	2.07341	2.0434	0.0768101
1261.2	0.73743	1.45714	1.81301	2.27667	2.54859	3.37754	3.92555	4.37623	4.73478	5.04545	5.29663	5.53988			1361.3	0.15958				0.27767	0.013106	0.232258	0.245364	0.44953	0.0180898	0.498315	0.516404	0.80112	0.0249831	0.789607	0.81459	1.06127	0.0292186	1.08104	1.11026	1.41052	0.0437606	1.41367	1.45743	1.65393	0.0549236	1.66314	1.71807	1.86207	0.0628808	1.99577	2.05865	2.02858	0.0740695
1261.9	0.72944	1.44287	1.80177	2.261	2.53279	3.35506	3.90032	4.3471	4.70435	5.01303	5.26381	5.50681			1362	0.15627				0.27118	0.012604	0.227257	0.239861	0.44375	0.0174039	0.492926	0.51033	0.79207	0.0240454	0.782446	0.806492	1.05204	0.0281274	1.07425	1.10237	1.39869	0.0421514	1.40479	1.44694	1.64063	0.052925	1.65269	1.70561	1.84785	0.0606047	1.98323	2.04383	2.0138	0.0714167
1262.6	0.72146	1.43227	1.78896	2.24285	2.51131	3.32966	3.87079	4.3142	4.66659	4.97508	5.22276	5.46638			1362.7	0.15297				0.26468	0.0121196	0.222316	0.234435	0.43797	0.0167416	0.487535	0.504277	0.78305	0.0231396	0.775256	0.798395	1.04282	0.0270733	1.06738	1.09446	1.38689	0.0405958	1.39581	1.4364	1.62736	0.050992	1.64213	1.69312	1.83366	0.0584029	1.97055	2.02895	1.99904	0.0688494
1263.3	0.71347	1.42167	1.77664	2.22946	2.49689	3.30826	3.84592	4.28746	4.63767	4.94425	5.19039	5.43125			1363.4	0.14967				0.25819	0.0116522	0.217436	0.229088	0.43219	0.0161023	0.482144	0.498246	0.77406	0.0222648	0.768036	0.790301	1.0336	0.026055	1.06045	1.0865	1.3751	0.0390922	1.38674	1.42583	1.61412	0.0491228	1.63146	1.68058	1.81949	0.0562732	1.95775	2.01402	1.98432	0.0663651
1264	0.70549	1.41108	1.76401	2.21106	2.47571	3.28246	3.81593	4.25402	4.60363	4.90456	5.15229	5.39014			1364.1	0.14636				0.25406	0.0112012	0.212618	0.223819	0.42641	0.0154853	0.476753	0.492238	0.7651	0.0214201	0.76079	0.78221	1.02439	0.0250715	1.05345	1.07852	1.36334	0.037639	1.37759	1.41523	1.6009	0.0473155	1.62069	1.66801	1.80535	0.0542136	1.94483	1.99904	1.96963	0.0639616
1264.7	0.6975	1.40048	1.75025	2.19634	2.45923	3.25987	3.78791	4.22474	4.56983	4.8708	5.11446	5.3518			1364.8	0.14306				0.25011	0.0107662	0.207863	0.218629	0.42063	0.0148898	0.471365	0.486255	0.75617	0.0206046	0.753518	0.774123	1.01518	0.0241218	1.04638	1.07051	1.3516	0.0362348	1.36835	1.40458	1.5877	0.0455684	1.60982	1.65539	1.79125	0.0522222	1.93179	1.98401	1.95498	0.0616366
1265.4	0.69126	1.38988	1.737	2.17871	2.43893	3.23296	3.76011	4.18986	4.53315	4.83393	5.07341	5.31129			1365.5	0.13976				0.24616	0.0103467	0.203171	0.213517	0.41485	0.0143153	0.46598	0.480295	0.74728	0.0198174	0.746225	0.766042	1.00598	0.0232048	1.03926	1.06246	1.33988	0.0348782	1.35903	1.39391	1.57453	0.0438798	1.59886	1.64274	1.77717	0.0502969	1.91863	1.96892	1.94037	0.0593878
1266.1	0.68687	1.37928	1.72425	2.16371	2.42382	3.2107	3.73336	4.16294	4.50298	4.79954	5.04197	5.27473			1366.2	0.13645				0.24222	0.0099421	0.198542	0.208484	0.40907	0.013761	0.460599	0.47436	0.73842	0.0190577	0.738911	0.757968	0.99679	0.0223196	1.03207	1.05439	1.32819	0.0335676	1.34963	1.38319	1.56139	0.0422478	1.5878	1.63004	1.76313	0.0484359	1.90536	1.95379	1.92579	0.0572131
1266.8	0.68247	1.36868	1.71317	2.14833	2.40769	3.1886	3.70851	4.13523	4.47301	4.7676	5.00841	5.24083			1366.9	0.13325				0.23827	0.00955201	0.193978	0.20353	0.40329	0.0132263	0.455225	0.468451	0.7296	0.0183245	0.731578	0.749902	0.98761	0.0214652	1.02482	1.04629	1.31653	0.0323018	1.34015	1.37245	1.54828	0.0406708	1.57665	1.61732	1.74913	0.0466372	1.89198	1.93861	1.91125	0.0551104
1267.5	0.67807	1.35808	1.70255	2.13403	2.39001	3.16811	3.68383	4.10582	4.44222	4.73369	4.97279	5.20475			1367.6	0.13011				0.23432	0.00917595	0.189478	0.198654	0.39751	0.0127106	0.449857	0.462568	0.72082	0.017617	0.724228	0.741845	0.97843	0.0206406	1.01752	1.03816	1.30489	0.0310795	1.3306	1.36168	1.53521	0.0391473	1.56541	1.60456	1.73517	0.0448991	1.87849	1.92339	1.89676	0.0530776
1268.2	0.67368	1.34748	1.69317	2.12227	2.37684	3.14992	3.66269	4.08413	4.41977	4.70977	4.94652	5.17607			1368.3	0.12696				0.23038	0.00881348	0.185044	0.193857	0.39173	0.0122134	0.444498	0.456712	0.71208	0.0169345	0.716864	0.733798	0.96927	0.0198449	1.01016	1.03	1.29328	0.0298992	1.32097	1.35087	1.52216	0.0376756	1.55409	1.59176	1.72124	0.0432198	1.8649	1.90812	1.88231	0.0511126
1268.9	0.66928	1.33688	1.68229	2.10863	2.36048	3.12896	3.63831	4.05602	4.39137	4.67735	4.91473	5.14162			1369	0.12382				0.22643	0.00846414	0.180674	0.189139	0.38594	0.0117339	0.439149	0.450883	0.70337	0.0162762	0.709487	0.725763	0.96011	0.0190773	1.00274	1.02182	1.2817	0.0287598	1.31128	1.34004	1.50915	0.0362542	1.54268	1.57894	1.70736	0.0415975	1.85122	1.89282	1.8679	0.0492136
1269.6	0.66489	1.32628	1.67109	2.09508	2.34639	3.11028	3.6141	4.02903	4.36114	4.64836	4.88315	5.11211			1369.7	0.12068				0.22249	0.00812752	0.176371	0.184498	0.38016	0.0112718	0.43381	0.445082	0.69471	0.0156414	0.702099	0.71774	0.95097	0.0183367	0.995281	1.01362	1.27015	0.0276599	1.30152	1.32918	1.49618	0.0348816	1.5312	1.56608	1.69351	0.0400305	1.83744	1.87747	1.85354	0.0473785
1270.3	0.66049	1.31568	1.65997	2.07922	2.32809	3.08745	3.58757	4.00313	4.33012	4.61636	4.85065	5.07341			1370.4	0.11753				0.21854	0.00780321	0.172133	0.179936	0.37438	0.0108263	0.428484	0.43931	0.68609	0.0150291	0.694703	0.709732	0.94185	0.0176225	0.987768	1.00539	1.25863	0.0265984	1.2917	1.3183	1.48325	0.0335563	1.51964	1.5532	1.67971	0.0385172	1.82357	1.86209	1.83923	0.0456056
1271	0.65609	1.30508	1.6493	2.06728	2.3142	3.06902	3.56862	3.97832	4.30328	4.58564	4.81726	5.04313			1371.1	0.11439				0.21459	0.00749079	0.167961	0.175452	0.3686	0.0103969	0.42317	0.433567	0.67752	0.0144389	0.687299	0.701738	0.93274	0.0169338	0.980209	0.997143	1.24714	0.0255741	1.28181	1.30739	1.47035	0.0322768	1.50801	1.54029	1.66596	0.0370559	1.80962	1.84667	1.82496	0.0438928
1271.7	0.6517	1.29448	1.63569	2.05022	2.29615	3.04229	3.53916	3.94366	4.26776	4.54883	4.77859	5.00035			1371.8	0.11124				0.21065	0.00718988	0.163856	0.171046	0.36282	0.00998326	0.417871	0.427855	0.66898	0.0138699	0.67989	0.69376	0.92364	0.0162697	0.972604	0.988874	1.23569	0.0245858	1.27187	1.29645	1.4575	0.0310418	1.49631	1.52736	1.65225	0.0356451	1.79558	1.83122	1.81075	0.0422385
1272.4	0.6473	1.28389	1.6233	2.03517	2.27877	3.01995	3.51156	3.91381	4.23643	4.5144	4.74242	4.96249			1372.5	0.1081				0.2067	0.0069001	0.159817	0.166717	0.35704	0.0095847	0.412588	0.422172	0.6605	0.0133215	0.672479	0.6858	0.91457	0.0156295	0.964956	0.980585	1.22427	0.0236324	1.26187	1.2855	1.44468	0.0298499	1.48455	1.5144	1.63859	0.0342833	1.78146	1.81574	1.79659	0.040641
1273.1	0.64291	1.27329	1.61065	2.01976	2.25944	2.99571	3.48257	3.88419	4.20146	4.47816	4.70435	4.92266			1373.2	0.10495				0.20276	0.00662108	0.155844	0.162465	0.35126	0.00920078	0.407321	0.416521	0.65206	0.0127929	0.665066	0.677859	0.90551	0.0150124	0.957266	0.972279	1.21288	0.0227128	1.25181	1.27452	1.43191	0.0286998	1.47272	1.50142	1.62498	0.0329689	1.76726	1.80023	1.78247	0.0390984
1273.8	0.63851	1.26269	1.59809	2.00447	2.2444	2.97372	3.457	3.8539	4.17061	4.44529	4.67089	4.88877			1373.9	0.10181				0.19881	0.00635246	0.151938	0.158291	0.34548	0.008831	0.402071	0.410902	0.64366	0.0122837	0.657653	0.669937	0.89647	0.0144176	0.949537	0.963955	1.20152	0.021826	1.2417	1.26353	1.41918	0.0275902	1.46083	1.48842	1.61142	0.0317005	1.75299	1.78469	1.76842	0.0376091
1274.5	0.63411	1.25209	1.58928	1.98976	2.22792	2.95393	3.434	3.82913	4.1419	4.41367	4.63767	4.854			1374.6	0.09867				0.19486	0.00609389	0.148098	0.154192	0.3397	0.00847491	0.39684	0.405315	0.63532	0.011793	0.650243	0.662036	0.88745	0.0138445	0.941771	0.955616	1.1902	0.0209709	1.23155	1.25252	1.4065	0.0265198	1.44888	1.4754	1.5979	0.0304767	1.73865	1.76913	1.75441	0.0361715
1275.2	0.62972	1.24149	1.57906	1.97651	2.21208	2.93224	3.40879	3.80189	4.11339	4.38228	4.60469	4.8217			1375.3	0.09552				0.19092	0.00584503	0.144325	0.15017	0.33392	0.00813205	0.391629	0.399761	0.62702	0.0113204	0.642837	0.654157	0.87845	0.0132923	0.933969	0.947262	1.17891	0.0201465	1.22134	1.24149	1.39387	0.0254873	1.43688	1.46236	1.58445	0.0292961	1.72425	1.75355	1.74047	0.034784
1275.9	0.62532	1.23089	1.56783	1.96336	2.19938	2.9134	3.38688	3.77746	4.08507	4.35412	4.57615	4.7874			1376	0.09238				0.18697	0.00560555	0.140618	0.146223	0.32814	0.00780197	0.386438	0.39424	0.61877	0.0108653	0.635437	0.646302	0.86948	0.0127604	0.926134	0.938895	1.16767	0.0193518	1.2111	1.23045	1.38128	0.0244917	1.42482	1.44931	1.57104	0.0281572	1.70979	1.73794	1.72658	0.0334452
1276.6	0.62093	1.22029	1.55955	1.95164	2.18524	2.89668	3.36667	3.75405	4.06069	4.32912	4.54779	4.75883			1376.7	0.08923				0.18303	0.00537514	0.136977	0.142352	0.32236	0.00748425	0.38127	0.388754	0.61058	0.0104269	0.628044	0.638471	0.86053	0.012248	0.918267	0.930516	1.15645	0.0185858	1.20081	1.2194	1.36874	0.0235317	1.41272	1.43625	1.55769	0.0270589	1.69526	1.72232	1.71275	0.0321533
1277.3	0.61653	1.20969	1.55167	1.94312	2.1727	2.87939	3.34888	3.73422	4.03738	4.30328	4.52272	4.7326			1377.4	0.08609				0.17908	0.00515349	0.133401	0.138555	0.31658	0.00717847	0.376124	0.383302	0.60244	0.0100049	0.620661	0.630666	0.8516	0.0117546	0.910371	0.922126	1.14528	0.0178477	1.19049	1.20833	1.35626	0.0226061	1.40057	1.42318	1.5444	0.0259998	1.68068	1.70668	1.69899	0.0309071
1278	0.61214	1.19909	1.5417	1.93152	2.16023	2.86484	3.32966	3.71193	4.01328	4.27563	4.49469	4.70435			1378.1	0.08294				0.17513	0.00494029	0.129892	0.134832	0.3108	0.00688423	0.371001	0.377885	0.59435	0.00959861	0.613289	0.622888	0.84271	0.0112795	0.902447	0.913726	1.13415	0.0171366	1.18012	1.19726	1.34383	0.021714	1.38838	1.41009	1.53117	0.0249787	1.66606	1.69103	1.68528	0.029705
1278.7	0.60774	1.18849	1.53568	1.92309	2.15179	2.85036	3.3136	3.69573	3.99485	4.25696	4.47301	4.68274			1378.8	0.0798				0.17119	0.00473524	0.126448	0.131183	0.30502	0.00660113	0.365903	0.372505	0.58631	0.00920754	0.60593	0.615137	0.83383	0.0108221	0.894497	0.905319	1.12305	0.0164515	1.16973	1.18618	1.33145	0.0208542	1.37615	1.397	1.518	0.0239943	1.65138	1.67537	1.67164	0.0285458
1279.4	0.60334	1.17789	1.52581	1.91073	2.13698	2.83204	3.29079	3.66944	3.96917	4.22961	4.44427	4.6505			1379.5	0.07666				0.16724	0.00453808	0.123069	0.127607	0.29924	0.00632879	0.360831	0.36716	0.57834	0.00883118	0.598585	0.607416	0.82499	0.0103818	0.886523	0.896905	1.11199	0.0157915	1.1593	1.17509	1.31912	0.0200256	1.36388	1.38391	1.50489	0.0230456	1.63666	1.6597	1.65807	0.0274279
1280.1	0.59895	1.16729	1.51565	1.89671	2.12178	2.8119	3.26814	3.64334	3.93913	4.19952	4.41164	4.61743			1380.2	0.07351				0.1633	0.00434853	0.119755	0.124103	0.29346	0.00606684	0.355785	0.361852	0.57041	0.00846902	0.591256	0.599725	0.81617	0.00995806	0.878527	0.888485	1.10097	0.015156	1.14884	1.164	1.30685	0.0192273	1.35158	1.37081	1.49183	0.0221312	1.6219	1.64403	1.64456	0.0263502
1280.8	0.59455	1.1567	1.50557	1.88452	2.10863	2.79319	3.24638	3.6191	3.91291	4.17157	4.38329	4.5867			1380.9	0.07037				0.15935	0.00416631	0.116505	0.120671	0.28768	0.00581493	0.350766	0.356581	0.56255	0.00812059	0.583945	0.592065	0.80739	0.00955026	0.870511	0.880061	1.09	0.014544	1.13836	1.1529	1.29464	0.0184582	1.33925	1.35771	1.47885	0.0212502	1.6071	1.62835	1.63111	0.0253113
1281.5	0.59016	1.1461	1.49348	1.86896	2.09122	2.77141	3.22107	3.5917	3.8824	4.13619	4.3481	4.55093			1381.6	0.06813				0.1554	0.00399117	0.11332	0.117311	0.2819	0.0055727	0.345776	0.351349	0.55474	0.00778541	0.576653	0.584438	0.79863	0.00915789	0.862477	0.871635	1.07907	0.0139548	1.12785	1.14181	1.28249	0.0177174	1.32689	1.3446	1.46593	0.0204015	1.59226	1.61267	1.61774	0.02431
1282.2	0.58576	1.1355	1.48081	1.8531	2.07444	2.74853	3.19301	3.55959	3.84946	4.1011	4.30923	4.51232			1382.3	0.06753				0.15146	0.00382286	0.110198	0.114021	0.27612	0.00533983	0.340814	0.346154	0.54699	0.00746303	0.569382	0.576845	0.78991	0.00878042	0.854426	0.863206	1.06818	0.0133875	1.11733	1.13071	1.27039	0.017004	1.3145	1.33151	1.45307	0.0195839	1.5774	1.59699	1.60443	0.023345
1282.9	0.58136	1.1249	1.47197	1.8412	2.06016	2.72835	3.17249	3.5359	3.82208	4.07193	4.27858	4.4761			1383	0.06693				0.14751	0.00366115	0.107139	0.1108	0.27034	0.00511597	0.335882	0.340998	0.5393	0.007153	0.562133	0.569286	0.78122	0.00841734	0.846361	0.854778	1.05734	0.0128416	1.10678	1.11962	1.25836	0.0163171	1.30209	1.31841	1.44028	0.0187964	1.56251	1.58131	1.5912	0.0224153
1283.6	0.57697	1.1143	1.46614	1.82894	2.0455	2.70894	3.14702	3.50833	3.79053	4.0411	4.24717	4.44222			1383.7	0.06633				0.14357	0.00350578	0.104143	0.107649	0.26456	0.00490081	0.330981	0.335882	0.53167	0.0068549	0.554907	0.561762	0.77256	0.00806814	0.838283	0.846351	1.04655	0.0123162	1.09622	1.10853	1.24639	0.0156557	1.28967	1.30532	1.42756	0.0180381	1.5476	1.56564	1.57803	0.0215195
1284.3	0.57257	1.1037	1.45575	1.81719	2.03142	2.69092	3.1268	3.48498	3.76617	4.01513	4.21891	4.41469			1384.4	0.06573				0.13962	0.00335654	0.101209	0.104566	0.25877	0.00469405	0.326111	0.330805	0.5241	0.0065683	0.547707	0.554276	0.76394	0.00773236	0.830194	0.837926	1.03581	0.0118107	1.08564	1.09745	1.23449	0.015019	1.27722	1.29224	1.41492	0.017308	1.53267	1.54997	1.56495	0.0206567
1285	0.56818	1.0931	1.44536	1.80553	2.01963	2.67427	3.10746	3.46263	3.74288	3.98908	4.19154	4.3857			1385.1	0.06513				0.13567	0.00321321	0.0983374	0.101551	0.25299	0.00449539	0.321273	0.325768	0.5166	0.00629282	0.540534	0.546827	0.75536	0.00740953	0.822096	0.829506	1.02512	0.0113243	1.07505	1.08637	1.22265	0.0144063	1.26476	1.27917	1.40234	0.0166052	1.51772	1.53432	1.55194	0.0198258
1285.7	0.56378	1.0825	1.43497	1.79537	2.00851	2.6591	3.08913	3.44283	3.72113	3.96548	4.16655	4.3595			1385.8	0.06454				0.13173	0.00307557	0.0955266	0.0986022	0.24721	0.00430454	0.316467	0.320772	0.50916	0.00602805	0.533389	0.539417	0.74681	0.00709919	0.813991	0.82109	1.01448	0.0108564	1.06445	1.07531	1.21088	0.0138166	1.25229	1.26611	1.38984	0.0159287	1.50275	1.51868	1.53901	0.0190256
1286.4	0.55938	1.0719	1.42458	1.78583	1.99781	2.64449	3.07215	3.42351	3.69999	3.94277	4.1426	4.33455			1386.5	0.06394				0.12778	0.00294342	0.0927764	0.0957199	0.24143	0.00412122	0.311695	0.315816	0.50179	0.00577362	0.526273	0.532047	0.73831	0.00680089	0.80588	0.812681	1.0039	0.0104065	1.05384	1.06425	1.19918	0.0132492	1.23982	1.25306	1.37742	0.0152776	1.48778	1.50306	1.52616	0.0182551
1287.1	0.55499	1.0613	1.41419	1.77534	1.98611	2.62895	3.0541	3.40325	3.67768	3.9188	4.11747	4.30832			1387.2	0.06334				0.12383	0.00281655	0.0900863	0.0929028	0.23565	0.00394515	0.306957	0.310902	0.49448	0.00552916	0.519188	0.524718	0.72984	0.00651423	0.797766	0.80428	0.99337	0.00997378	1.04323	1.05321	1.18754	0.0127033	1.22733	1.24004	1.36507	0.0146511	1.4728	1.48745	1.51339	0.0175135
1287.8	0.55059	1.0507	1.4038	1.76483	1.97405	2.61269	3.03515	3.38205	3.65472	3.8939	4.09151	4.28102			1387.9	0.06274				0.11989	0.00269478	0.0874555	0.0901503	0.23091	0.00377609	0.302254	0.30603	0.48724	0.00529431	0.512136	0.51743	0.72141	0.00623878	0.789649	0.795888	0.9829	0.00955775	1.03262	1.04218	1.17599	0.0121783	1.21485	1.22702	1.3528	0.0140483	1.45781	1.47186	1.5007	0.0167996
1288.5	0.5462	1.0401	1.39341	1.75449	1.96235	2.59674	3.01678	3.3613	3.63202	3.86953	4.06577	4.254			1388.6	0.06214				0.11594	0.00257792	0.0848835	0.0874614	0.22677	0.00361376	0.297586	0.3012	0.48007	0.00506874	0.505116	0.510185	0.71303	0.00597415	0.781533	0.787507	0.97249	0.00915779	1.022	1.03116	1.1645	0.0116733	1.20236	1.21403	1.34062	0.0134684	1.44283	1.4563	1.4881	0.0161126
1289.2	0.54167	1.02951	1.38302	1.74468	1.95148	2.58174	2.99939	3.34166	3.61049	3.84641	4.04168	4.22829			1389.3	0.06154				0.112	0.00246578	0.0823697	0.0848354	0.22263	0.00345793	0.292954	0.296412	0.47297	0.0048521	0.498132	0.502984	0.70469	0.00571995	0.773418	0.779138	0.96213	0.00877335	1.01139	1.02017	1.15309	0.0111877	1.18987	1.20106	1.32851	0.0129107	1.42785	1.44076	1.47559	0.0154515
1289.9	0.5371	1.01891	1.37263	1.73541	1.94101	2.56776	2.98301	3.32279	3.59	3.82459	4.01859	4.20402			1390	0.06094				0.10805	0.00235819	0.0799132	0.0822714	0.2185	0.00330837	0.288358	0.291667	0.46594	0.00464407	0.491183	0.495827	0.6964	0.00547581	0.765306	0.770781	0.95184	0.00840388	1.00078	1.00919	1.14176	0.0107208	1.17739	1.18811	1.3165	0.0123744	1.41287	1.42525	1.46316	0.0148155
1290.6	0.53254	1.00831	1.36224	1.72653	1.93097	2.55422	2.96701	3.30478	3.57018	3.80348	3.99628	4.18054			1390.7	0.06034				0.1041	0.00225498	0.0775136	0.0797686	0.21436	0.00316483	0.2838	0.286965	0.45898	0.00444435	0.484272	0.488716	0.68815	0.00524135	0.757198	0.76244	0.94161	0.00804885	0.990183	0.998231	1.13051	0.010272	1.16492	1.17519	1.30456	0.0118587	1.3979	1.40976	1.45082	0.0142037
1291.3	0.52798	0.99771	1.35185	1.7178	1.92103	2.54082	2.95131	3.287	3.55071	3.7824	3.97419	4.1572			1391.4	0.05974				0.10016	0.00215598	0.07517	0.077326	0.21022	0.0030271	0.279279	0.282306	0.45209	0.00425262	0.477398	0.481651	0.67994	0.00501624	0.749098	0.754114	0.93144	0.00770775	0.979589	0.987297	1.11933	0.00984058	1.15246	1.1623	1.29271	0.0113629	1.38295	1.39431	1.43858	0.0136153
1292	0.52341	0.98711	1.34146	1.70904	1.91125	2.52746	2.93566	3.26927	3.53135	3.76156	3.95212	4.134			1392.1	0.05914				0.09621	0.00206105	0.0728818	0.0749428	0.20609	0.00289496	0.274796	0.277691	0.44528	0.0040686	0.470565	0.474633	0.67179	0.00480013	0.741005	0.745805	0.92134	0.00738008	0.969007	0.976387	1.10824	0.00942598	1.14001	1.14943	1.28096	0.0108863	1.36801	1.3789	1.42642	0.0130494
1292.7	0.51885	0.97651	1.33107	1.70035	1.9015	2.51414	2.92003	3.25166	3.51198	3.74071	3.93028	4.11087			1392.8	0.05854				0.09348	0.00197003	0.0706482	0.0726182	0.20195	0.0027682	0.270352	0.27312	0.43854	0.003892	0.463772	0.467664	0.66368	0.00459269	0.732922	0.737515	0.9113	0.00706535	0.958437	0.965502	1.09723	0.00902759	1.12757	1.1366	1.26929	0.0104283	1.35309	1.36352	1.41437	0.0125053
1293.4	0.51428	0.96591	1.32067	1.69173	1.89169	2.50081	2.90445	3.23403	3.49255	3.71987	3.9084	4.08778			1393.5	0.05795				0.09235	0.00188276	0.0684685	0.0703512	0.19781	0.00264663	0.265947	0.268593	0.43187	0.00372255	0.45702	0.460743	0.65563	0.0043936	0.724851	0.729245	0.90134	0.00676311	0.947882	0.954645	1.08631	0.00864484	1.11516	1.1238	1.25772	0.00998812	1.33819	1.34817	1.40241	0.0119823
1294.1	0.50972	0.95531	1.31028	1.68332	1.8822	2.48784	2.88925	3.21685	3.47374	3.6996	3.88697	4.06526			1394.2	0.05735				0.09122	0.00179911	0.0663419	0.068141	0.19368	0.00253004	0.261581	0.264111	0.42529	0.00355998	0.450311	0.453871	0.64762	0.00420256	0.716793	0.720995	0.89144	0.00647289	0.937344	0.943817	1.07547	0.00827716	1.10276	1.11103	1.24624	0.00956521	1.32331	1.33287	1.39054	0.0114795
1294.8	0.50516	0.94471	1.29989	1.6749	1.87272	2.47482	2.8741	3.19963	3.45486	3.67928	3.86565	4.0427			1394.9	0.05675				0.09009	0.00171893	0.0642677	0.0659866	0.18954	0.00241825	0.257255	0.259673	0.41878	0.00340404	0.443646	0.44705	0.63967	0.00401927	0.708749	0.712768	0.88161	0.00619427	0.926825	0.933019	1.06472	0.00792402	1.09038	1.09831	1.23485	0.00915894	1.30846	1.31762	1.37878	0.0109963
1295.5	0.50059	0.93411	1.2895	1.66654	1.86328	2.46194	2.85904	3.18252	3.43612	3.65915	3.84445	4.02037			1395.6	0.05615				0.08896	0.0016421	0.0622451	0.0638872	0.1854	0.00231108	0.252969	0.255281	0.41235	0.00325447	0.437026	0.44028	0.63178	0.00384344	0.700721	0.704564	0.87186	0.00592682	0.916327	0.922254	1.05406	0.0075849	1.07803	1.08562	1.22357	0.0087687	1.29364	1.30241	1.36713	0.0105319
1296.2	0.49603	0.92351	1.27911	1.65817	1.85376	2.44906	2.84383	3.1653	3.41723	3.63885	3.82303	3.99786			1396.3	0.05555				0.08783	0.00156849	0.0602734	0.0618419	0.18127	0.00220836	0.248725	0.250933	0.406	0.00311105	0.430451	0.433562	0.62393	0.00367479	0.69271	0.696385	0.86218	0.00567013	0.905852	0.911522	1.04349	0.00725927	1.06571	1.07297	1.21238	0.00839393	1.27885	1.28724	1.35557	0.0100858
1296.9	0.49147	0.91291	1.26872	1.64973	1.84422	2.43604	2.82856	3.14801	3.39825	3.61846	3.80146	3.97523			1397	0.05495				0.0867	0.00149797	0.0583517	0.0598497	0.17713	0.0021099	0.244521	0.246631	0.39973	0.00297353	0.423923	0.426896	0.61615	0.00351305	0.684719	0.688232	0.85257	0.0054238	0.895401	0.900825	1.03301	0.00694667	1.05341	1.06036	1.2013	0.00803405	1.2641	1.27213	1.34413	0.00965724
1297.6	0.4869	0.90232	1.25833	1.64127	1.83466	2.42301	2.81325	3.13076	3.37925	3.59802	3.77991	3.95256			1397.7	0.05435				0.08557	0.00143041	0.0564792	0.0579097	0.17299	0.00201556	0.240358	0.242374	0.39354	0.0028417	0.417442	0.420283	0.60842	0.00335796	0.676748	0.680106	0.84305	0.00518745	0.884978	0.890165	1.02264	0.00664659	1.04115	1.0478	1.19032	0.00768854	1.24938	1.25707	1.33279	0.00924559
1298.3	0.48234	0.89393	1.24794	1.63294	1.82526	2.41021	2.79816	3.11375	3.36054	3.57789	3.75874	3.93025			1398.4	0.05375				0.08444	0.00136572	0.0546553	0.056021	0.16886	0.00192516	0.236238	0.238163	0.38744	0.00271533	0.411009	0.413725	0.60075	0.00320927	0.668799	0.672008	0.8336	0.00496071	0.874583	0.879543	1.01235	0.0063586	1.02892	1.03528	1.17944	0.00735686	1.2347	1.24206	1.32156	0.00885025
1299	0.47777	0.88682	1.23755	1.62487	1.81613	2.39769	2.78345	3.09707	3.34227	3.55821	3.73799	3.9084			1399.1	0.05315				0.08331	0.00130377	0.0528789	0.0541827	0.16472	0.00183857	0.232159	0.233998	0.38142	0.00259422	0.404626	0.40722	0.59315	0.00306675	0.660873	0.66394	0.82423	0.00474322	0.864218	0.868961	1.00217	0.00608224	1.01673	1.02281	1.16868	0.00703851	1.22007	1.22711	1.31045	0.00847064
1299.7	0.47321	0.87971	1.22716	1.61679	1.807	2.38524	2.76883	3.08051	3.32408	3.53863	3.71735	3.88662			1399.8	0.05255				0.08218	0.00124446	0.0511495	0.0523939	0.16058	0.00175562	0.228122	0.229878	0.37549	0.00247817	0.398293	0.400771	0.5856	0.00293014	0.652972	0.655902	0.81495	0.00453463	0.853886	0.858421	0.99209	0.00581708	1.00457	1.01039	1.15802	0.006733	1.20549	1.21222	1.29945	0.00810619
1300.4	0.46865	0.87259	1.21677	1.60872	1.79793	2.37282	2.75427	3.06404	3.30598	3.5191	3.69674	3.86496			1400.5	0.05195				0.08105	0.00118768	0.049466	0.0506537	0.15645	0.00167619	0.224128	0.225805	0.36965	0.00236698	0.39201	0.394377	0.57812	0.00279923	0.645097	0.647896	0.80575	0.00433462	0.843588	0.847923	0.98211	0.00556271	0.992457	0.998019	1.14749	0.00643985	1.19095	1.19739	1.28858	0.00775634
1301.1	0.46408	0.86548	1.20638	1.60073	1.78887	2.36046	2.7397	3.04757	3.28787	3.49961	3.67614	3.84327
1301.8	0.45952	0.85837	1.19599	1.59277	1.77989	2.34818	2.72523	3.03122	3.26989	3.48025	3.65577	3.82176
1302.5	0.45496	0.85126	1.1856	1.5849	1.771	2.336	2.71084	3.015	3.25206	3.46101	3.63551	3.8004
1303.2	0.45039	0.84415	1.17521	1.57714	1.76217	2.32394	2.69662	2.9989	3.23441	3.44204	3.61548	3.77925
1303.9	0.44583	0.83704	1.16482	1.56946	1.75347	2.31202	2.68255	2.98299	3.21695	3.42325	3.59567	3.75835
1304.6	0.44126	0.82993	1.15443	1.56183	1.74481	2.30018	2.66858	2.96722	3.19963	3.40461	3.57594	3.73758
1305.3	0.4367	0.82282	1.1442	1.55429	1.73626	2.2885	2.65474	2.95162	3.1825	3.38613	3.55647	3.71703
1306	0.43214	0.81571	1.13613	1.54686	1.72785	2.27697	2.64109	2.9362	3.16558	3.36794	3.53724	3.69677
1306.7	0.42757	0.8086	1.12807	1.53958	1.71957	2.26569	2.62776	2.9211	3.149	3.35006	3.51839	3.6769
1307.4	0.42301	0.80148	1.12	1.53212	1.71157	2.25471	2.61479	2.90646	3.13289	3.33273	3.50005	3.65754
1308.1	0.41845	0.79437	1.11193	1.5245	1.70381	2.24406	2.6022	2.89217	3.11719	3.31585	3.48222	3.63868
1308.8	0.41388	0.78726	1.10386	1.51673	1.69621	2.2336	2.58984	2.87816	3.10181	3.29929	3.46472	3.62022
1309.5	0.40932	0.78015	1.0958	1.50883	1.68873	2.22336	2.57768	2.86437	3.08669	3.28297	3.44747	3.60204
1310.2	0.40475	0.77304	1.08773	1.5008	1.68137	2.21324	2.56566	2.85077	3.07173	3.26686	3.43046	3.58406
1310.9	0.40019	0.76593	1.07966	1.49266	1.67414	2.20329	2.55384	2.83738	3.05701	3.251	3.4137	3.56638
1311.6	0.39563	0.75882	1.07159	1.48442	1.66705	2.19352	2.54225	2.82425	3.04257	3.23543	3.39725	3.54899
1312.3	0.39106	0.75171	1.06352	1.47608	1.66007	2.18389	2.53082	2.81125	3.02828	3.22004	3.381	3.53181
1313	0.3865	0.7446	1.05546	1.46768	1.65316	2.17436	2.51952	2.79841	3.01416	3.20482	3.36492	3.51484
1313.7	0.38194	0.73749	1.04739	1.45924	1.64635	2.16495	2.50834	2.78574	3.0002	3.18979	3.34906	3.49807
1314.4	0.37737	0.73037	1.03932	1.45077	1.63958	2.15562	2.49725	2.77312	2.98634	3.17489	3.33329	3.48144
1315.1	0.37281	0.72326	1.03125	1.44226	1.63291	2.14639	2.4863	2.76067	2.97263	3.16015	3.3177	3.46497
1315.8	0.36825	0.71615	1.02319	1.43373	1.62634	2.1373	2.47552	2.74838	2.95914	3.1456	3.30233	3.44874
1316.5	0.36368	0.70904	1.01512	1.42516	1.61985	2.12831	2.46484	2.73623	2.9458	3.1312	3.28711	3.43268
1317.2	0.35912	0.70193	1.00705	1.41657	1.6134	2.11937	2.4542	2.72415	2.93254	3.1169	3.272	3.41672
1317.9	0.35504	0.69482	0.99898	1.40796	1.6069	2.11039	2.44352	2.71202	2.91921	3.10252	3.25678	3.4007
1318.6	0.35205	0.68771	0.99092	1.39932	1.60044	2.10145	2.43289	2.69995	2.90597	3.08825	3.24167	3.38476
1319.3	0.34906	0.6806	0.98285	1.39052	1.59407	2.09264	2.42242	2.68803	2.89286	3.07415	3.22675	3.36903
1320	0.34607	0.67349	0.97478	1.38152	1.58768	2.08381	2.41193	2.67611	2.87977	3.06005	3.21184	3.35329
1320.7	0.34308	0.66638	0.96671	1.37235	1.58129	2.07498	2.40142	2.66418	2.86667	3.04592	3.19693	3.33754
1321.4	0.34009	0.65926	0.95865	1.363	1.57481	2.06605	2.39081	2.65213	2.85345	3.03168	3.18188	3.32165
1322.1	0.3371	0.65215	0.95058	1.35349	1.56846	2.0572	2.3803	2.64022	2.84038	3.01761	3.16699	3.30595
1322.8	0.33412	0.64504	0.94251	1.34384	1.56195	2.0485	2.36996	2.62849	2.82751	3.00375	3.15232	3.29048
1323.5	0.33113	0.63793	0.93444	1.33404	1.55525	2.03985	2.35969	2.61683	2.81474	2.98997	3.13773	3.27511
1324.2	0.32814	0.63082	0.92637	1.32411	1.54839	2.03114	2.34935	2.6051	2.80188	2.97611	3.12306	3.25965
1324.9	0.32515	0.62371	0.91831	1.31404	1.54136	2.02251	2.33907	2.59342	2.78907	2.96232	3.10848	3.24427
1325.6	0.32216	0.6166	0.91024	1.30386	1.53418	2.01377	2.3291	2.58198	2.77629	2.94857	3.09391	3.22892
1326.3	0.31917	0.60949	0.90217	1.29355	1.52685	2.00492	2.31887	2.57026	2.76387	2.93519	3.07974	3.21398
1327	0.31618	0.60238	0.8941	1.28312	1.51938	1.99597	2.3084	2.5583	2.75155	2.92191	3.06569	3.19915
1327.7	0.31319	0.59527	0.88604	1.27259	1.51179	1.98693	2.2977	2.54611	2.73943	2.90885	3.05185	3.18457
1328.4	0.3102	0.58815	0.87797	1.26195	1.50407	1.97776	2.28679	2.53381	2.7272	2.89567	3.03792	3.16988
1329.1	0.30721	0.58104	0.86884	1.25121	1.49614	1.96828	2.27571	2.5214	2.71483	2.88253	3.02403	3.15523
1329.8	0.30423	0.57393	0.8588	1.24039	1.48795	1.95849	2.26447	2.5089	2.70203	2.86927	3.00999	3.14045
1330.5	0.30124	0.56682	0.84876	1.22947	1.47953	1.94841	2.25308	2.49628	2.68892	2.8557	2.99566	3.12534
1331.2	0.29825	0.55971	0.83871	1.21857	1.47088	1.93803	2.24155	2.48337	2.67553	2.84196	2.98114	3.11005
1331.9	0.29526	0.5526	0.82867	1.20776	1.46201	1.92723	2.22971	2.47015	2.66188	2.82798	2.96637	3.09449
1332.6	0.29227	0.54549	0.81863	1.19704	1.45294	1.916	2.21738	2.45665	2.64801	2.81389	2.95147	3.07883
1333.3	0.28928	0.53838	0.80858	1.1864	1.4437	1.90438	2.20461	2.44293	2.63397	2.79971	2.93703	3.06316
1334	0.28629	0.53127	0.79854	1.17583	1.43431	1.89242	2.1915	2.42909	2.61974	2.78518	2.92211	3.04748
1334.7	0.2833	0.52451	0.7885	1.16534	1.42478	1.88022	2.17811	2.41513	2.60535	2.77032	2.90673	3.03174
1335.4	0.28031	0.51801	0.77846	1.15492	1.41512	1.86779	2.16446	2.40105	2.59079	2.75513	2.89092	3.01584
1336.1	0.27732	0.51152	0.76841	1.14456	1.40532	1.85515	2.15055	2.38685	2.57607	2.7397	2.87498	2.99972
1336.8	0.27434	0.50502	0.75837	1.13427	1.39541	1.84231	2.13642	2.3725	2.56118	2.72417	2.859	2.98348
1337.5	0.27135	0.49853	0.74833	1.12404	1.38538	1.82928	2.12211	2.358	2.54614	2.70855	2.843	2.96711
1338.2	0.26836	0.49203	0.73828	1.11386	1.37525	1.81623	2.10778	2.34336	2.53095	2.69284	2.82687	2.95062
1338.9	0.26528	0.48553	0.72824	1.10374	1.36516	1.80322	2.09343	2.32859	2.51561	2.67705	2.81061	2.93403
1339.6	0.26197	0.47904	0.7182	1.09367	1.35512	1.79027	2.0791	2.31373	2.50016	2.66118	2.79421	2.91733
1340.3	0.25867	0.47254	0.70816	1.08364	1.34514	1.77736	2.06481	2.29886	2.48469	2.64527	2.77769	2.90062
1341	0.25537	0.46605	0.69811	1.07366	1.3352	1.76449	2.05055	2.28401	2.46923	2.6294	2.7612	2.88398
1341.7	0.25206	0.45955	0.68807	1.06374	1.32531	1.75166	2.03633	2.26916	2.45376	2.61358	2.74486	2.86743
1342.4	0.24876	0.45306	0.67803	1.05388	1.31547	1.73887	2.02215	2.25433	2.43829	2.59782	2.72865	2.85095
1343.1	0.24546	0.44656	0.66798	1.0441	1.30567	1.72612	2.008	2.2395	2.42281	2.58211	2.71257	2.83454
1343.8	0.24215	0.44007	0.65794	1.03437	1.29591	1.71344	1.99389	2.22469	2.40733	2.56644	2.69655	2.81819
1344.5	0.23885	0.43357	0.6479	1.02469	1.28619	1.70084	1.97984	2.20988	2.39185	2.55081	2.68051	2.8019
1345.2	0.23555	0.42707	0.63873	1.01507	1.2765	1.68831	1.96584	2.19508	2.37638	2.53521	2.66446	2.78567
1345.9	0.23224	0.42058	0.63024	1.0055	1.26685	1.67584	1.9519	2.18029	2.36095	2.51965	2.64842	2.76949
1346.6	0.22894	0.41408	0.62174	0.99597	1.25724	1.66344	1.938	2.16555	2.34554	2.50411	2.63245	2.75334
1347.3	0.22564	0.40759	0.61325	0.98648	1.24768	1.65108	1.92416	2.15085	2.33017	2.48856	2.61653	2.73721
1348	0.22234	0.40109	0.60475	0.97703	1.23817	1.63879	1.91036	2.13619	2.31482	2.473	2.60066	2.72109
1348.7	0.21903	0.3946	0.59625	0.96761	1.22869	1.62654	1.89662	2.12158	2.2995	2.45744	2.58484	2.70498
1349.4	0.21573	0.3881	0.58776	0.95822	1.21925	1.61433	1.88293	2.107	2.2842	2.44188	2.56904	2.68888
1350.1	0.21243	0.3816	0.57926	0.94886	1.20984	1.60216	1.86927	2.09245	2.26896	2.42636	2.55326	2.67279
1350.8	0.20912	0.37511	0.57077	0.93951	1.20046	1.59003	1.85566	2.07793	2.25375	2.41086	2.53749	2.65671
1351.5	0.20582	0.36861	0.56227	0.93019	1.1911	1.57793	1.84207	2.06342	2.23857	2.39538	2.52173	2.64064
1352.2	0.20252	0.36212	0.55377	0.92087	1.18177	1.56585	1.82851	2.04894	2.22343	2.37993	2.50599	2.62458
1352.9	0.19921	0.35562	0.54528	0.91157	1.17245	1.55381	1.81498	2.03447	2.20831	2.36449	2.49025	2.60852
1353.6	0.19591	0.34913	0.53678	0.90227	1.16315	1.54178	1.80147	2.02002	2.1932	2.34906	2.47451	2.59246
1354.3	0.19261	0.34263	0.52828	0.89298	1.15386	1.52978	1.78797	2.00558	2.17812	2.33363	2.45879	2.57641
1355	0.1893	0.33614	0.51979	0.88369	1.14458	1.51778	1.77448	1.99114	2.16303	2.31821	2.44306	2.56035
1355.7	0.186	0.32964	0.51129	0.87442	1.1353	1.5058	1.76101	1.97672	2.14798	2.30282	2.42737	2.54435
1356.4	0.1827	0.32314	0.5028	0.86517	1.12603	1.49383	1.74756	1.96231	2.13295	2.28746	2.41172	2.52838
1357.1	0.17939	0.31665	0.4943	0.85595	1.11676	1.48187	1.73412	1.94793	2.11795	2.27213	2.39611	2.51247
1357.8	0.17609	0.31015	0.4858	0.84675	1.10749	1.46994	1.72071	1.93356	2.10298	2.25682	2.38055	2.49659
1358.5	0.17279	0.30366	0.47731	0.83757	1.09824	1.45802	1.70731	1.91922	2.08804	2.24155	2.36502	2.48076
1359.2	0.16949	0.29716	0.46881	0.82842	1.08898	1.44611	1.69393	1.90489	2.07313	2.22631	2.34952	2.46498
1359.9	0.16618	0.29067	0.46109	0.8193	1.07974	1.43423	1.68057	1.8906	2.05825	2.2111	2.33407	2.44924
1360.6	0.16288	0.28417	0.45531	0.8102	1.0705	1.42236	1.66724	1.87632	2.0434	2.19592	2.31866	2.43354
1361.3	0.15958	0.27767	0.44953	0.80112	1.06127	1.41052	1.65393	1.86207	2.02858	2.18078	2.30328	2.41788
1362	0.15627	0.27118	0.44375	0.79207	1.05204	1.39869	1.64063	1.84785	2.0138	2.16566	2.28794	2.40227
1362.7	0.15297	0.26468	0.43797	0.78305	1.04282	1.38689	1.62736	1.83366	1.99904	2.15058	2.27264	2.38669
1363.4	0.14967	0.25819	0.43219	0.77406	1.0336	1.3751	1.61412	1.81949	1.98432	2.13553	2.25737	2.37115
1364.1	0.14636	0.25406	0.42641	0.7651	1.02439	1.36334	1.6009	1.80535	1.96963	2.12051	2.24214	2.35565
1364.8	0.14306	0.25011	0.42063	0.75617	1.01518	1.3516	1.5877	1.79125	1.95498	2.10553	2.22695	2.34019
1365.5	0.13976	0.24616	0.41485	0.74728	1.00598	1.33988	1.57453	1.77717	1.94037	2.09058	2.2118	2.32476
1366.2	0.13645	0.24222	0.40907	0.73842	0.99679	1.32819	1.56139	1.76313	1.92579	2.07567	2.19669	2.30937
1366.9	0.13325	0.23827	0.40329	0.7296	0.98761	1.31653	1.54828	1.74913	1.91125	2.06079	2.18161	2.29402
1367.6	0.13011	0.23432	0.39751	0.72082	0.97843	1.30489	1.53521	1.73517	1.89676	2.04596	2.16658	2.27871
1368.3	0.12696	0.23038	0.39173	0.71208	0.96927	1.29328	1.52216	1.72124	1.88231	2.03116	2.15158	2.26344
1369	0.12382	0.22643	0.38594	0.70337	0.96011	1.2817	1.50915	1.70736	1.8679	2.0164	2.13663	2.2482
1369.7	0.12068	0.22249	0.38016	0.69471	0.95097	1.27015	1.49618	1.69351	1.85354	2.00169	2.12172	2.23301
1370.4	0.11753	0.21854	0.37438	0.68609	0.94185	1.25863	1.48325	1.67971	1.83923	1.98702	2.10686	2.21785
1371.1	0.11439	0.21459	0.3686	0.67752	0.93274	1.24714	1.47035	1.66596	1.82496	1.9724	2.09204	2.20274
1371.8	0.11124	0.21065	0.36282	0.66898	0.92364	1.23569	1.4575	1.65225	1.81075	1.95783	2.07727	2.18766
1372.5	0.1081	0.2067	0.35704	0.6605	0.91457	1.22427	1.44468	1.63859	1.79659	1.9433	2.06254	2.17264
1373.2	0.10495	0.20276	0.35126	0.65206	0.90551	1.21288	1.43191	1.62498	1.78247	1.92882	2.04787	2.15765
1373.9	0.10181	0.19881	0.34548	0.64366	0.89647	1.20152	1.41918	1.61142	1.76842	1.91439	2.03324	2.14272
1374.6	0.09867	0.19486	0.3397	0.63532	0.88745	1.1902	1.4065	1.5979	1.75441	1.90002	2.01866	2.12783
1375.3	0.09552	0.19092	0.33392	0.62702	0.87845	1.17891	1.39387	1.58445	1.74047	1.88569	2.00414	2.113
1376	0.09238	0.18697	0.32814	0.61877	0.86948	1.16767	1.38128	1.57104	1.72658	1.87143	1.98967	2.09821
1376.7	0.08923	0.18303	0.32236	0.61058	0.86053	1.15645	1.36874	1.55769	1.71275	1.85722	1.97525	2.08348
1377.4	0.08609	0.17908	0.31658	0.60244	0.8516	1.14528	1.35626	1.5444	1.69899	1.84307	1.96089	2.06881
1378.1	0.08294	0.17513	0.3108	0.59435	0.84271	1.13415	1.34383	1.53117	1.68528	1.82897	1.94659	2.05419
1378.8	0.0798	0.17119	0.30502	0.58631	0.83383	1.12305	1.33145	1.518	1.67164	1.81494	1.93234	2.03962
1379.5	0.07666	0.16724	0.29924	0.57834	0.82499	1.11199	1.31912	1.50489	1.65807	1.80097	1.91816	2.02512
1380.2	0.07351	0.1633	0.29346	0.57041	0.81617	1.10097	1.30685	1.49183	1.64456	1.78706	1.90403	2.01067
1380.9	0.07037	0.15935	0.28768	0.56255	0.80739	1.09	1.29464	1.47885	1.63111	1.77322	1.88997	1.99629
1381.6	0.06813	0.1554	0.2819	0.55474	0.79863	1.07907	1.28249	1.46593	1.61774	1.75945	1.87597	1.98197
1382.3	0.06753	0.15146	0.27612	0.54699	0.78991	1.06818	1.27039	1.45307	1.60443	1.74573	1.86204	1.96771
1383	0.06693	0.14751	0.27034	0.5393	0.78122	1.05734	1.25836	1.44028	1.5912	1.73209	1.84817	1.95351
1383.7	0.06633	0.14357	0.26456	0.53167	0.77256	1.04655	1.24639	1.42756	1.57803	1.71852	1.83437	1.93939
1384.4	0.06573	0.13962	0.25877	0.5241	0.76394	1.03581	1.23449	1.41492	1.56495	1.70502	1.82065	1.92533
1385.1	0.06513	0.13567	0.25299	0.5166	0.75536	1.02512	1.22265	1.40234	1.55194	1.6916	1.80699	1.91134
1385.8	0.06454	0.13173	0.24721	0.50916	0.74681	1.01448	1.21088	1.38984	1.53901	1.67825	1.79341	1.89743
1386.5	0.06394	0.12778	0.24143	0.50179	0.73831	1.0039	1.19918	1.37742	1.52616	1.66498	1.77991	1.88359
1387.2	0.06334	0.12383	0.23565	0.49448	0.72984	0.99337	1.18754	1.36507	1.51339	1.65178	1.76648	1.86982
1387.9	0.06274	0.11989	0.23091	0.48724	0.72141	0.9829	1.17599	1.3528	1.5007	1.63867	1.75313	1.85613
1388.6	0.06214	0.11594	0.22677	0.48007	0.71303	0.97249	1.1645	1.34062	1.4881	1.62564	1.73987	1.84253
1389.3	0.06154	0.112	0.22263	0.47297	0.70469	0.96213	1.15309	1.32851	1.47559	1.6127	1.72668	1.829
1390	0.06094	0.10805	0.2185	0.46594	0.6964	0.95184	1.14176	1.3165	1.46316	1.59983	1.71358	1.81556
1390.7	0.06034	0.1041	0.21436	0.45898	0.68815	0.94161	1.13051	1.30456	1.45082	1.58706	1.70056	1.8022
1391.4	0.05974	0.10016	0.21022	0.45209	0.67994	0.93144	1.11933	1.29271	1.43858	1.57438	1.68764	1.78892
1392.1	0.05914	0.09621	0.20609	0.44528	0.67179	0.92134	1.10824	1.28096	1.42642	1.56178	1.6748	1.77573
1392.8	0.05854	0.09348	0.20195	0.43854	0.66368	0.9113	1.09723	1.26929	1.41437	1.54928	1.66205	1.76264
1393.5	0.05795	0.09235	0.19781	0.43187	0.65563	0.90134	1.08631	1.25772	1.40241	1.53687	1.6494	1.74963
1394.2	0.05735	0.09122	0.19368	0.42529	0.64762	0.89144	1.07547	1.24624	1.39054	1.52456	1.63684	1.73672
1394.9	0.05675	0.09009	0.18954	0.41878	0.63967	0.88161	1.06472	1.23485	1.37878	1.51235	1.62438	1.72391
1395.6	0.05615	0.08896	0.1854	0.41235	0.63178	0.87186	1.05406	1.22357	1.36713	1.50024	1.61202	1.71119
1396.3	0.05555	0.08783	0.18127	0.406	0.62393	0.86218	1.04349	1.21238	1.35557	1.48823	1.59976	1.69857
1397	0.05495	0.0867	0.17713	0.39973	0.61615	0.85257	1.03301	1.2013	1.34413	1.47633	1.5876	1.68605
1397.7	0.05435	0.08557	0.17299	0.39354	0.60842	0.84305	1.02264	1.19032	1.33279	1.46453	1.57555	1.67364
1398.4	0.05375	0.08444	0.16886	0.38744	0.60075	0.8336	1.01235	1.17944	1.32156	1.45284	1.5636	1.66133
1399.1	0.05315	0.08331	0.16472	0.38142	0.59315	0.82423	1.00217	1.16868	1.31045	1.44127	1.55177	1.64914
1399.8	0.05255	0.08218	0.16058	0.37549	0.5856	0.81495	0.99209	1.15802	1.29945	1.42981	1.54005	1.63705
1400.5	0.05195	0.08105	0.15645	0.36965	0.57812	0.80575	0.98211	1.14749	1.28858	1.41846	1.52845	1.62509
1401.2	0.05136	0.07992	0.15231	0.36389	0.5707	0.79664	0.97225	1.13706	1.27782	1.40724	1.51697	1.61324
1401.9	0.05076	0.07879	0.14817	0.35822	0.56335	0.78762	0.96249	1.12676	1.2672	1.39615	1.50561	1.60152
1402.6	0.05016	0.07766	0.14404	0.35264	0.55608	0.7787	0.95284	1.11659	1.2567	1.38518	1.49439	1.58992
1403.3	0.04956	0.07653	0.1399	0.34715	0.54887	0.76986	0.94332	1.10654	1.24634	1.37434	1.48329	1.57846
1404	0.04896	0.0754	0.13576	0.34165	0.54164	0.76101	0.93376	1.09645	1.23595	1.36348	1.47217	1.56696
1404.7	0.04836	0.07427	0.13163	0.33612	0.53439	0.75212	0.92417	1.08634	1.22552	1.35259	1.46102	1.55545
1405.4	0.04776	0.07314	0.12749	0.33059	0.52712	0.74321	0.91456	1.0762	1.21507	1.34167	1.44985	1.54392
1406.1	0.04716	0.07201	0.12335	0.32504	0.51983	0.73427	0.90491	1.06603	1.20459	1.33073	1.43865	1.53236
1406.8	0.04656	0.07088	0.11922	0.3195	0.51251	0.7253	0.89523	1.05583	1.19408	1.31976	1.42743	1.52078
1407.5	0.04596	0.06975	0.11508	0.31395	0.50516	0.71631	0.88552	1.0456	1.18354	1.30877	1.41619	1.50918
1408.2	0.04536	0.06862	0.11094	0.3084	0.4978	0.70728	0.87578	1.03534	1.17298	1.29775	1.40492	1.49756
1408.9	0.04477	0.06749	0.10681	0.30285	0.4904	0.69822	0.86601	1.02506	1.16239	1.28671	1.39364	1.48592
1409.6	0.04417	0.06636	0.10267	0.29731	0.48298	0.68913	0.8562	1.01474	1.15178	1.27565	1.38234	1.47428
1410.3	0.04357	0.06523	0.09853	0.29178	0.47552	0.68001	0.84637	1.0044	1.14114	1.26456	1.37102	1.46261
1411	0.04297	0.0641	0.0944	0.28625	0.46803	0.67085	0.83649	0.99402	1.13046	1.25345	1.35967	1.45092
1411.7	0.04237	0.06297	0.09026	0.28074	0.46051	0.66165	0.82658	0.9836	1.11975	1.2423	1.3483	1.4392
1412.4	0.04177	0.06184	0.08612	0.27525	0.45298	0.65244	0.81667	0.97319	1.10905	1.23118	1.33695	1.42752
1413.1	0.04117	0.06071	0.08199	0.26977	0.44542	0.64321	0.80673	0.96275	1.09834	1.22005	1.32561	1.41583
1413.8	0.04057	0.05958	0.07785	0.26433	0.43782	0.63394	0.79675	0.9523	1.0876	1.20889	1.31424	1.40413
1414.5	0.03997	0.05845	0.07371	0.25897	0.43019	0.62463	0.78675	0.94181	1.07685	1.19772	1.30286	1.39243
1415.2	0.03937	0.05732	0.06958	0.25368	0.42253	0.61529	0.77672	0.9313	1.06608	1.18654	1.29148	1.38074
1415.9	0.03877	0.05619	0.06544	0.24848	0.41489	0.60599	0.76673	0.92085	1.05538	1.17544	1.28018	1.36913
1416.6	0.03818	0.05506	0.0613	0.24338	0.40719	0.59662	0.75669	0.91035	1.04462	1.16428	1.26884	1.35748
1417.3	0.03758	0.05393	0.05717	0.23837	0.39948	0.58724	0.74663	0.89984	1.03387	1.15314	1.25753	1.34586
1418	0.03698	0.0528	0.05962	0.23347	0.39182	0.57775	0.73648	0.88922	1.02301	1.1419	1.24612	1.33414
1418.7	0.03638	0.05167	0.05964	0.22869	0.38422	0.56826	0.72631	0.87861	1.01217	1.13068	1.23473	1.32246
1419.4	0.03578	0.05054	0.05973	0.22403	0.37668	0.55874	0.71615	0.86803	1.00136	1.1195	1.22341	1.31084
1420.1	0.03518	0.04941	0.05992	0.21951	0.36921	0.54922	0.70586	0.85735	0.99056	1.10833	1.21209	1.29924
1420.8	0.02849	0.04828	0.05995	0.21513	0.36181	0.53973	0.69556	0.84669	0.97965	1.09706	1.20068	1.28754
1421.5	0.02864	0.04715	0.06002	0.2109	0.35448	0.53028	0.6854	0.8362	0.96858	1.08562	1.1891	1.27568
1422.2	0.02859	0.04602	0.05999	0.20683	0.34724	0.52087	0.67538	0.82587	0.95745	1.07414	1.17748	1.26379
1422.9	0.02869	0.04489	0.0601	0.20293	0.34008	0.51152	0.66551	0.81566	0.94627	1.0626	1.16582	1.25183
1423.6	0.0287	0.04376	0.06016	0.19922	0.33303	0.50232	0.65579	0.80556	0.93515	1.05115	1.15423	1.23999
1424.3	0.0287	0.04263	0.06021	0.19569	0.3262	0.49337	0.6462	0.79557	0.92438	1.03972	1.14271	1.2282
1425	0.02885	0.04333	0.06038	0.19237	0.31958	0.48469	0.63677	0.78568	0.91388	1.02852	1.13143	1.21667
1425.7	0.0288	0.04325	0.06036	0.18923	0.31321	0.47627	0.62749	0.77602	0.90369	1.01748	1.12031	1.20534
1426.4	0.02885	0.04334	0.06044	0.18617	0.30709	0.46823	0.61843	0.76672	0.89382	1.0068	1.10959	1.1944
1427.1	0.02893	0.04333	0.06041	0.18316	0.30123	0.46069	0.60986	0.75778	0.88425	0.99632	1.09908	1.18369
1427.8	0.02893	0.0434	0.06042	0.18022	0.29564	0.45367	0.60189	0.74922	0.87497	0.98594	1.08838	1.17316
1428.5	0.02906	0.04348	0.0607	0.17735	0.29031	0.44719	0.59448	0.74094	0.86599	0.97595	1.07786	1.16267
1429.2	0.02898	0.04367	0.06079	0.17455	0.28525	0.44117	0.58755	0.73293	0.85733	0.96649	1.06801	1.15235
1429.9	0.02914	0.04371	0.06095	0.17182	0.28047	0.43559	0.58113	0.7252	0.84901	0.95757	1.05887	1.14223
1430.6	0.02933	0.04386	0.06115	0.16918	0.276	0.43049	0.57525	0.71777	0.84108	0.94923	1.05035	1.13264
1431.3	0.02937	0.04399	0.06129	0.16662	0.27184	0.42589	0.56992	0.71072	0.83356	0.94127	1.04205	1.1234
1432	0.02941	0.04414	0.06149	0.16415	0.26803	0.42182	0.56519	0.70409	0.82646	0.93365	1.03398	1.11453
1432.7	0.0295	0.04425	0.06155	0.16177	0.26457	0.4182	0.56082	0.69792	0.81984	0.92639	1.0262	1.10605
1433.4	0.02954	0.04429	0.06169	0.15949	0.26135	0.41475	0.55675	0.69222	0.81371	0.9195	1.01891	1.09799
1434.1	0.02966	0.04448	0.06193	0.15732	0.2582	0.41146	0.55296	0.68702	0.80812	0.913	1.01214	1.09037
1434.8	0.02979	0.04456	0.06204	0.15526	0.25513	0.40833	0.54939	0.68217	0.80292	0.90691	1.00592	1.08317
1435.5	0.02983	0.04471	0.06221	0.15332	0.25214	0.40539	0.54604	0.67758	0.79801	0.9011	1.00017	1.07609
1436.2	0.02998	0.04489	0.06242	0.1515	0.24924	0.40264	0.54292	0.67326	0.79342	0.89542	0.99439	1.06908
1436.9	0.03007	0.045	0.06265	0.14973	0.24642	0.4001	0.54004	0.66924	0.78916	0.88989	0.98853	1.06213
1437.6	0.03027	0.04524	0.06298	0.14802	0.24371	0.39777	0.53743	0.66552	0.78527	0.88452	0.98258	1.05524
1438.3	0.03029	0.04535	0.06314	0.14637	0.24109	0.3956	0.53508	0.66214	0.78175	0.87932	0.9766	1.04843
1439	0.03051	0.04567	0.06354	0.14478	0.23858	0.39352	0.53293	0.65911	0.77865	0.87431	0.97093	1.04169
1439.7	0.03058	0.04576	0.06367	0.14325	0.23619	0.39152	0.53097	0.65646	0.77597	0.86952	0.96566	1.03504
1440.4	0.03077	0.04592	0.06396	0.14179	0.23393	0.38963	0.52922	0.65421	0.77362	0.86495	0.9608	1.02847
1441.1	0.03076	0.04604	0.0639	0.1404	0.23175	0.38783	0.5277	0.65231	0.7716	0.86063	0.95609	1.02203
1441.8	0.03082	0.04618	0.06425	0.1391	0.22962	0.38615	0.52641	0.65064	0.76992	0.85672	0.95149	1.01584
1442.5	0.03096	0.04633	0.06437	0.13787	0.22754	0.38458	0.52531	0.64921	0.76861	0.8533	0.94699	1.00991
1443.2	0.03118	0.04669	0.06484	0.13674	0.2255	0.38314	0.52438	0.64803	0.76769	0.8504	0.9426	1.00428
1443.9	0.03131	0.04686	0.06512	0.1357	0.22352	0.38183	0.52365	0.64714	0.7672	0.84807	0.93838	0.99895
1444.6	0.03148	0.04713	0.06546	0.13478	0.2216	0.38067	0.52312	0.64657	0.76699	0.84611	0.93447	0.99396
1445.3	0.03162	0.04735	0.06584	0.13398	0.21974	0.37966	0.52281	0.64637	0.76702	0.84442	0.93092	0.98933
1446	0.03187	0.04765	0.06622	0.13332	0.21794	0.37882	0.52273	0.64658	0.76729	0.84303	0.92773	0.98508
1446.7	0.03203	0.04799	0.06661	0.13279	0.21622	0.37816	0.52292	0.64721	0.76783	0.84196	0.92495	0.98124
1447.4	0.03223	0.04836	0.06711	0.13242	0.21458	0.37761	0.52337	0.64832	0.76866	0.84127	0.92259	0.97774
1448.1	0.03247	0.0487	0.06762	0.13222	0.21302	0.37713	0.52411	0.64993	0.7698	0.84099	0.92062	0.97459
1448.8	0.03276	0.04907	0.06815	0.13219	0.21158	0.3767	0.52503	0.65209	0.77127	0.84116	0.91906	0.97183
1449.5	0.03295	0.04931	0.06863	0.13237	0.21035	0.37635	0.52615	0.65484	0.77299	0.84183	0.91794	0.96949
1450.2	0.03329	0.04986	0.06923	0.13275	0.20933	0.37607	0.52746	0.65749	0.77498	0.84303	0.91731	0.9676
1450.9	0.03365	0.05038	0.06998	0.13338	0.20854	0.37587	0.52901	0.66031	0.77726	0.8447	0.91721	0.96622
1451.6	0.03394	0.0508	0.07055	0.13426	0.20802	0.37576	0.5308	0.66325	0.77985	0.8467	0.91768	0.96538
1452.3	0.03416	0.05118	0.07118	0.13542	0.20778	0.37575	0.53286	0.66633	0.78279	0.84905	0.91863	0.96514
1453	0.03439	0.05168	0.07175	0.13689	0.20785	0.37585	0.53522	0.66955	0.78611	0.85179	0.92007	0.96556
1453.7	0.0348	0.05219	0.07236	0.1382	0.20827	0.37607	0.53791	0.67294	0.78985	0.85497	0.92205	0.96672
1454.4	0.03498	0.0526	0.07292	0.13913	0.20931	0.37643	0.5409	0.67651	0.7939	0.85862	0.92462	0.9687
1455.1	0.03536	0.05311	0.07373	0.1401	0.21072	0.37693	0.54406	0.68026	0.79815	0.86281	0.92786	0.97158
1455.8	0.03568	0.05369	0.07452	0.14111	0.2122	0.3776	0.54735	0.68419	0.80261	0.86759	0.93184	0.97548
1456.5	0.03617	0.05436	0.07535	0.14217	0.21374	0.37846	0.5508	0.68831	0.80731	0.87244	0.93629	0.9804
1457.2	0.03656	0.05495	0.07624	0.14328	0.21536	0.37954	0.55444	0.69265	0.81224	0.87757	0.9411	0.98574
1457.9	0.03701	0.05559	0.07727	0.14447	0.21709	0.38092	0.55836	0.69735	0.81757	0.88311	0.94632	0.99153
1458.6	0.03749	0.05635	0.0782	0.14572	0.21892	0.38265	0.5625	0.70231	0.82324	0.88901	0.95201	0.99769
1459.3	0.03786	0.05693	0.07908	0.14704	0.22085	0.38477	0.56687	0.70755	0.82919	0.89524	0.95823	1.00423
1460	0.03837	0.05761	0.07999	0.14842	0.22288	0.38734	0.57147	0.71309	0.83549	0.9018	0.96508	1.01111
1460.7	0.0387	0.0583	0.08089	0.14987	0.225	0.39044	0.57634	0.71892	0.84212	0.90873	0.97265	1.01839
1461.4	0.03925	0.0591	0.08194	0.15138	0.22721	0.39416	0.58142	0.725	0.84905	0.916	0.98015	1.026
1462.1	0.03969	0.05981	0.08298	0.15297	0.22954	0.39861	0.58675	0.73138	0.85636	0.92362	0.98808	1.03403
1462.8	0.04024	0.06056	0.08398	0.1546	0.23194	0.40255	0.59227	0.73795	0.8639	0.93148	0.99622	1.04233
1463.5	0.04073	0.06144	0.08515	0.15632	0.23446	0.4067	0.59807	0.7449	0.87188	0.9398	1.00483	1.0511
1464.2	0.04124	0.06226	0.08624	0.15813	0.23712	0.41107	0.60423	0.75228	0.88036	0.94862	1.01396	1.06046
1464.9	0.04174	0.06312	0.08744	0.16003	0.23991	0.41566	0.61066	0.76004	0.88922	0.95787	1.02357	1.07027
1465.6	0.04237	0.06384	0.08861	0.16198	0.24279	0.4204	0.61733	0.76807	0.8984	0.96744	1.03351	1.08044
1466.3	0.04278	0.06466	0.08966	0.164	0.24575	0.4253	0.6242	0.77633	0.90785	0.97736	1.04372	1.09084
1467	0.04347	0.06569	0.09105	0.16609	0.24884	0.43041	0.63136	0.78492	0.91772	0.98765	1.0544	1.10172
1467.7	0.04406	0.0666	0.09236	0.1683	0.25209	0.43577	0.63889	0.794	0.92807	0.99851	1.06569	1.11317
1468.4	0.04479	0.06767	0.09382	0.17059	0.25549	0.44137	0.64684	0.80351	0.93904	1.00996	1.07749	1.12528
1469.1	0.04554	0.06883	0.0955	0.173	0.25906	0.44725	0.65513	0.81351	0.95052	1.02194	1.08996	1.13805
1469.8	0.04621	0.07002	0.09709	0.17553	0.2628	0.45348	0.6639	0.82409	0.96271	1.03461	1.10319	1.15165
1470.5	0.04708	0.0713	0.09888	0.17827	0.26682	0.4602	0.67341	0.83554	0.97596	1.04843	1.11773	1.16643
1471.2	0.04777	0.07241	0.10043	0.18117	0.27109	0.46739	0.68359	0.84779	0.9901	1.06338	1.13319	1.18232
1471.9	0.04849	0.07352	0.10207	0.18412	0.27546	0.47468	0.69396	0.86023	1.00443	1.07846	1.14898	1.19831
1472.6	0.04929	0.07477	0.10361	0.18696	0.27972	0.48184	0.70405	0.87258	1.0187	1.0933	1.16473	1.21437
1473.3	0.05002	0.076	0.10551	0.18993	0.28423	0.48934	0.71466	0.8852	1.03331	1.10893	1.18073	1.23055
1474	0.0508	0.07723	0.1071	0.19316	0.28877	0.49659	0.72525	0.89855	1.04864	1.12459	1.19718	1.24763
1474.7	0.05163	0.07854	0.10889	0.19643	0.29361	0.5048	0.73673	0.91271	1.06414	1.14154	1.21526	1.2653
1475.4	0.05238	0.07974	0.11068	0.19939	0.29796	0.51265	0.7475	0.92518	1.07946	1.15803	1.23161	1.28228
1476.1	0.05317	0.08107	0.11248	0.20282	0.30294	0.52098	0.75981	0.93941	1.09599	1.17461	1.24959	1.30105
1476.8	0.05403	0.08236	0.11413	0.20597	0.30743	0.52847	0.7704	0.95291	1.11175	1.19046	1.26604	1.31793
1477.5	0.05477	0.08346	0.11588	0.20902	0.31149	0.53591	0.78093	0.96589	1.12673	1.20639	1.28248	1.33471
1478.2	0.05561	0.08484	0.11784	0.21213	0.31686	0.54425	0.79306	0.98071	1.14344	1.22407	1.30008	1.35357
1478.9	0.05654	0.08624	0.1197	0.21578	0.32216	0.55298	0.80596	0.99597	1.1604	1.24313	1.32028	1.37333
1479.6	0.05736	0.08764	0.1217	0.21913	0.32729	0.56197	0.81827	1.01145	1.17848	1.26126	1.3399	1.39348
1480.3	0.05826	0.08896	0.12359	0.22284	0.33239	0.57111	0.8314	1.02766	1.19708	1.28114	1.3601	1.41413
1481	0.05928	0.09076	0.12577	0.22657	0.33796	0.5809	0.84489	1.04409	1.21654	1.30111	1.38058	1.43608
1481.7	0.06007	0.092	0.12764	0.23004	0.34321	0.58968	0.85803	1.05957	1.23428	1.32044	1.40078	1.45613
1482.4	0.0609	0.09315	0.12939	0.23341	0.34791	0.59785	0.86974	1.07358	1.25089	1.33784	1.41857	1.4747
1483.1	0.06174	0.09465	0.13146	0.23703	0.35339	0.60744	0.88312	1.09031	1.26915	1.35708	1.43963	1.49585
1483.8	0.06251	0.09596	0.13323	0.24033	0.35839	0.61545	0.89536	1.10549	1.2868	1.37531	1.45868	1.51422
1484.5	0.06333	0.09716	0.13508	0.24362	0.3633	0.62391	0.9072	1.1206	1.30471	1.39317	1.47656	1.53387
1485.2	0.0642	0.09858	0.13709	0.24718	0.36825	0.63285	0.92022	1.13564	1.32167	1.41158	1.49676	1.55453
1485.9	0.0652	0.10009	0.13912	0.25089	0.3738	0.643	0.93454	1.15251	1.3419	1.43283	1.51898	1.57716
1486.6	0.06594	0.1013	0.14096	0.2541	0.37866	0.65105	0.94625	1.16748	1.35869	1.45079	1.53735	1.59543
1487.3	0.06664	0.10259	0.14259	0.25733	0.38313	0.65947	0.95785	1.18178	1.37471	1.46828	1.55475	1.6143
1488	0.06749	0.1038	0.14444	0.26062	0.38811	0.6676	0.9701	1.19631	1.39253	1.4866	1.57457	1.63376
1488.7	0.06819	0.1051	0.14618	0.26375	0.3927	0.67594	0.98128	1.21069	1.40803	1.50346	1.59207	1.65193
1489.4	0.06893	0.10619	0.14773	0.26675	0.39761	0.68362	0.99264	1.22499	1.4243	1.52095	1.60977	1.67109
1490.1	0.06965	0.10737	0.14951	0.27002	0.40231	0.69216	1.00507	1.23981	1.44247	1.53818	1.6291	1.68965
1490.8	0.07059	0.10889	0.1517	0.2739	0.40781	0.70147	1.01956	1.25676	1.46219	1.55924	1.65064	1.71229
1491.5	0.07146	0.11036	0.15367	0.27766	0.41377	0.71105	1.03252	1.27392	1.48122	1.5805	1.67286	1.73374
1492.2	0.07238	0.11176	0.15562	0.28125	0.41884	0.72044	1.04595	1.29013	1.49973	1.60101	1.69305	1.75548
1492.9	0.07324	0.11324	0.15779	0.28497	0.42448	0.73031	1.06051	1.30811	1.52091	1.62254	1.71575	1.77861
1493.6	0.07417	0.11465	0.15984	0.28861	0.42999	0.73962	1.074	1.32417	1.53959	1.64132	1.73604	1.79966
1494.3	0.07512	0.11604	0.16187	0.29235	0.43538	0.74921	1.08696	1.34104	1.56	1.66266	1.75739	1.82171
1495	0.07601	0.11749	0.16398	0.29628	0.44102	0.75896	1.10128	1.35784	1.57946	1.68346	1.77932	1.84454
1495.7	0.07695	0.11913	0.16607	0.29999	0.44673	0.76879	1.11637	1.37669	1.60038	1.70535	1.80327	1.86718
1496.4	0.07788	0.12067	0.16823	0.30437	0.45294	0.77915	1.1314	1.39459	1.62113	1.72706	1.825	1.89011
1497.1	0.07889	0.12229	0.17053	0.30832	0.45893	0.78979	1.14607	1.41301	1.64257	1.75023	1.84905	1.91424
1497.8	0.07971	0.12374	0.1725	0.31189	0.46457	0.79873	1.15903	1.42937	1.66117	1.76974	1.86876	1.93638
1498.5	0.08054	0.12506	0.17442	0.31551	0.46952	0.80763	1.17193	1.44492	1.6796	1.78898	1.88954	1.95743
1499.2	0.0814	0.12644	0.17656	0.31893	0.47516	0.81677	1.18577	1.46098	1.69871	1.80886	1.9106	1.97878
1499.9	0.08236	0.12794	0.1786	0.32277	0.4809	0.82681	1.1995	1.47888	1.71955	1.82984	1.9331	2.00211
1500.6	0.08341	0.12954	0.18092	0.32734	0.48713	0.83753	1.21536	1.49773	1.74107	1.85402	1.95734	2.02673
1501.3	0.08444	0.13122	0.18339	0.33151	0.49369	0.84882	1.23169	1.51827	1.76406	1.87802	1.98225	2.05255
1502	0.08544	0.13295	0.18582	0.33613	0.50055	0.86002	1.24766	1.53727	1.78817	1.90238	2.00889	2.07915
1502.7	0.08654	0.13484	0.18836	0.34072	0.50693	0.872	1.26536	1.55862	1.81099	1.92794	2.03591	2.10616
1503.4	0.08773	0.13661	0.1908	0.34538	0.5141	0.88369	1.28204	1.5796	1.83622	1.95386	2.06284	2.13396
1504.1	0.08891	0.13858	0.19355	0.35027	0.52149	0.89619	1.29985	1.6008	1.86127	1.98107	2.09006	2.16265
1504.8	0.0901	0.14051	0.19624	0.3553	0.52876	0.9097	1.31885	1.62457	1.88848	2.00956	2.12064	2.19323
1505.5	0.09136	0.1425	0.1992	0.3605	0.53649	0.92302	1.33754	1.64797	1.9156	2.0375	2.15007	2.22431
1506.2	0.09267	0.14461	0.20211	0.36602	0.54506	0.93693	1.35831	1.6724	1.94496	2.06873	2.182	2.25628
1506.9	0.09424	0.14713	0.20572	0.37265	0.5543	0.95324	1.38198	1.70152	1.97794	2.10473	2.21903	2.29401
1507.6	0.09573	0.14955	0.20912	0.3787	0.56318	0.96898	1.40447	1.72837	2.01057	2.13753	2.25452	2.33124
1508.3	0.09722	0.15202	0.21247	0.38459	0.57286	0.98471	1.42695	1.7569	2.04277	2.1727	2.2901	2.36808
1509	0.09893	0.15463	0.21637	0.39193	0.58311	1.0028	1.45281	1.78911	2.08023	2.21108	2.33165	2.41037
1509.7	0.1007	0.15758	0.22033	0.39922	0.59409	1.02121	1.4805	1.82197	2.11941	2.25221	2.37445	2.45466
1510.4	0.1026	0.16066	0.22464	0.4071	0.60597	1.0416	1.50908	1.85711	2.15979	2.29673	2.41965	2.50142
1511.1	0.10465	0.16379	0.22934	0.41573	0.61824	1.06345	1.54032	1.89643	2.20404	2.34317	2.4686	2.55206
1511.8	0.10684	0.16734	0.23431	0.42462	0.63161	1.08643	1.57434	1.93663	2.25278	2.39282	2.52092	2.60607
1512.5	0.1092	0.17096	0.23954	0.43381	0.64544	1.11022	1.60807	1.97991	2.30048	2.44567	2.57545	2.66187
1513.2	0.11159	0.17486	0.2449	0.44382	0.66078	1.13607	1.64553	2.02554	2.35455	2.50155	2.63546	2.72392
1513.9	0.11398	0.17898	0.25055	0.45373	0.67571	1.16229	1.6831	2.07131	2.40888	2.55981	2.69442	2.78607
1514.6	0.11672	0.1831	0.25656	0.46506	0.69192	1.19073	1.72464	2.122	2.46786	2.62182	2.76155	2.8523
1515.3	0.11954	0.18754	0.26284	0.47632	0.70917	1.22042	1.76765	2.17489	2.52882	2.68659	2.82849	2.9221
1516	0.1225	0.19257	0.26989	0.48944	0.72836	1.25372	1.81511	2.23329	2.59848	2.75932	2.90504	3.00113
1516.7	0.1257	0.19765	0.27707	0.50258	0.74758	1.28738	1.86381	2.29373	2.66813	2.83471	2.98371	3.08165
1517.4	0.12904	0.203	0.28464	0.51642	0.76817	1.32343	1.91647	2.35799	2.74227	2.91275	3.0645	3.16733
1518.1	0.1325	0.20855	0.29261	0.53065	0.78968	1.36021	1.96925	2.4235	2.81976	2.99501	3.15105	3.2553
1518.8	0.13603	0.21443	0.30074	0.54577	0.81142	1.39864	2.02581	2.49253	2.89941	3.07892	3.23934	3.34724
1519.5	0.13987	0.22049	0.3093	0.56118	0.83532	1.43983	2.08593	2.56471	2.98413	3.17033	3.33552	3.44583
1520.2	0.14389	0.22719	0.31877	0.57863	0.8611	1.48494	2.14936	2.64511	3.07764	3.2689	3.43919	3.55127
1520.9	0.14847	0.23453	0.32937	0.59772	0.89013	1.53394	2.22232	2.73424	3.18139	3.37754	3.55268	3.66932
1521.6	0.15347	0.2426	0.34079	0.61845	0.921	1.58855	2.30149	2.83166	3.29393	3.4979	3.67924	3.80008
1522.3	0.15912	0.25165	0.35366	0.64254	0.95599	1.64973	2.38894	2.93994	3.42067	3.63247	3.81995	3.94445
1523	0.16555	0.26218	0.36829	0.66926	0.99576	1.71875	2.48947	3.06435	3.563	3.78361	3.98065	4.10757
1523.7	0.17268	0.27384	0.38459	0.69887	1.04029	1.79602	2.60136	3.19991	3.72401	3.9528	4.15771	4.29135
1524.4	0.18061	0.28648	0.4028	0.73215	1.08983	1.88151	2.72651	3.35536	3.90138	4.14195	4.35573	4.4935
1525.1	0.1896	0.3013	0.42373	0.77074	1.14778	1.98246	2.87148	3.53384	4.10974	4.36116	4.58732	4.73248
1525.8	0.2	0.31805	0.44739	0.81396	1.21242	2.09558	3.03461	3.73373	4.34429	4.61105	4.8468	4.99907
1526.5	0.21146	0.33667	0.47412	0.86299	1.28514	2.22335	3.22111	3.96503	4.61224	4.89336	5.1435	5.30507
1527.2	0.22415	0.35793	0.50442	0.91834	1.36917	2.36924	3.43247	4.22317	4.91601	5.21562	5.48222	5.65316
1527.9	0.23825	0.38115	0.53726	0.97971	1.46035	2.52994	3.66525	4.51176	5.2543	5.57451	5.85682	6.03939
1528.6	0.25359	0.40635	0.57371	1.04665	1.56118	2.70589	3.92287	4.83109	5.62747	5.97179	6.27278	6.4683
1529.3	0.26911	0.43261	0.61134	1.11636	1.66631	2.89208	4.19571	5.16941	6.02715	6.39297	6.71672	6.92611
1530	0.28499	0.45951	0.64996	1.18851	1.77441	3.08539	4.47819	5.5213	6.44044	6.83605	7.17893	7.401
1530.7	0.30119	0.48663	0.68911	1.26213	1.88561	3.28481	4.77203	5.88493	6.87406	7.29461	7.66057	7.89932
1531.4	0.31596	0.51215	0.72625	1.33199	1.99138	3.47703	5.0548	6.2394	7.29311	7.74108	8.1275	8.38671
1532.1	0.32918	0.53493	0.75943	1.39541	2.08714	3.65266	5.31621	6.56811	7.68445	8.16025	8.56759	8.83876
1532.8	0.34012	0.55436	0.78811	1.44945	2.16997	3.80721	5.54887	6.85875	8.03179	8.52913	8.9569	9.24246
1533.5	0.34845	0.56898	0.80963	1.49177	2.23487	3.92834	5.73195	7.08997	8.31024	8.82885	9.2738	9.5717
1534.2	0.35297	0.57769	0.82298	1.51811	2.27485	4.0078	5.85336	7.24842	8.49992	9.03239	9.48769	9.79241
1534.9	0.35427	0.58076	0.82792	1.52863	2.29326	4.04397	5.91295	7.3256	8.59438	9.13699	9.59531	9.90808
1535.6	0.35288	0.57916	0.82621	1.52652	2.28957	4.04583	5.91703	7.33572	8.61022	9.16017	9.61743	9.92863
1536.3	0.34893	0.57279	0.81731	1.51148	2.2665	4.01152	5.87088	7.28356	8.55288	9.09293	9.54905	9.86251
1537	0.34224	0.56234	0.80277	1.4856	2.22974	3.94829	5.78366	7.17536	8.42777	8.95993	9.41364	9.72499
1537.7	0.33391	0.54878	0.78395	1.45179	2.17848	3.86106	5.65851	7.02168	8.25117	8.77618	9.2185	9.52116
1538.4	0.32429	0.53296	0.76136	1.41027	2.11716	3.75498	5.50556	6.83667	8.03179	8.54094	8.97133	9.26808
1539.1	0.31343	0.51511	0.73585	1.36302	2.04575	3.63085	5.32479	6.61212	7.76986	8.26421	8.67877	8.96992
1539.8	0.30167	0.4951	0.7076	1.311	1.96723	3.49066	5.12042	6.35978	7.46988	7.947	8.34754	8.6256
1540.5	0.29049	0.47588	0.67981	1.25864	1.88866	3.35282	4.91593	6.10442	7.1699	7.62438	8.01045	8.2773
1541.2	0.27966	0.45761	0.65311	1.20921	1.81365	3.21518	4.71416	5.85383	6.86932	7.30643	7.67461	7.93208
1541.9	0.27011	0.44096	0.62891	1.16306	1.74363	3.08681	4.52588	5.61623	6.58742	7.00332	7.35801	7.60136
1542.6	0.26238	0.42756	0.6091	1.12513	1.68676	2.98133	4.36416	5.41427	6.34763	6.74381	7.08699	7.32127
1543.3	0.25659	0.41715	0.59373	1.09598	1.64193	2.89605	4.23742	5.25223	6.152	6.54036	6.87002	7.09073
1544	0.25254	0.4101	0.58303	1.07548	1.6101	2.83799	4.14671	5.13742	6.01751	6.38858	6.7121	6.93088
1544.7	0.25011	0.40597	0.57675	1.06316	1.59095	2.80032	4.09074	5.06458	5.92805	6.29652	6.61391	6.82792
1545.4	0.24862	0.40345	0.57291	1.05512	1.57818	2.77657	4.05417	5.01815	5.87105	6.23597	6.5488	6.76378
1546.1	0.24742	0.40105	0.56963	1.04833	1.56912	2.75683	4.02536	4.97897	5.82662	6.18733	6.49917	6.71106
1546.8	0.24594	0.39902	0.56649	1.04256	1.55974	2.73911	3.99672	4.94362	5.78245	6.14473	6.45301	6.6633
1547.5	0.24442	0.39582	0.56207	1.03348	1.54616	2.71463	3.96098	4.89938	5.72812	6.08702	6.39376	6.60224
1548.2	0.24207	0.39219	0.55653	1.0233	1.53091	2.68663	3.91838	4.84444	5.66647	6.02153	6.32644	6.53413
1548.9	0.23908	0.38708	0.54877	1.00856	1.50819	2.6467	3.86015	4.77137	5.58106	5.93203	6.22815	6.43415
1549.6	0.23525	0.3808	0.53999	0.99174	1.48271	2.60021	3.79317	4.68753	5.48041	5.82514	6.12015	6.31957
1550.3	0.23101	0.37334	0.52941	0.97163	1.45296	2.54628	3.71199	4.58607	5.36184	5.70166	5.98627	6.18147
1551	0.22607	0.36534	0.51783	0.94952	1.41989	2.48717	3.62412	4.4786	5.23381	5.56425	5.8447	6.03383
1551.7	0.22031	0.35579	0.5043	0.92407	1.38151	2.41827	3.52211	4.34957	5.08408	5.40514	5.67621	5.86256
1552.4	0.2145	0.34594	0.4901	0.89764	1.34137	2.34642	3.41667	4.21643	4.92737	5.2409	5.50127	5.68057
1553.1	0.20813	0.33535	0.47489	0.86916	1.29883	2.26939	3.30371	4.07705	4.76335	5.06411	5.31565	5.48894
1553.8	0.20167	0.32471	0.4594	0.84043	1.2559	2.19183	3.19082	3.93495	4.58899	4.88658	5.13051	5.29653
1554.5	0.19509	0.31398	0.4438	0.81152	1.21158	2.11451	3.07402	3.79264	4.41894	4.70439	4.93922	5.09786
1555.2	0.18877	0.30311	0.42844	0.78307	1.1691	2.03708	2.96147	3.65209	4.25414	4.52796	4.75505	4.90782
1555.9	0.18245	0.29295	0.41351	0.75562	1.1276	1.96251	2.85236	3.51594	4.09364	4.35612	4.57463	4.72047
1556.6	0.1765	0.28294	0.39929	0.72913	1.0873	1.89195	2.74793	3.38646	3.94202	4.1938	4.40209	4.54344
1557.3	0.17066	0.27302	0.38538	0.70323	1.04871	1.82184	2.6455	3.25794	3.79237	4.03185	4.23504	4.37009
1558	0.16521	0.26393	0.37213	0.6789	1.01218	1.75755	2.55036	3.14079	3.65271	3.8851	4.08	4.20716
1558.7	0.15953	0.25491	0.35916	0.65448	0.97578	1.69241	2.45474	3.02166	3.51495	3.73515	3.92333	4.04751
1559.4	0.15422	0.24609	0.34648	0.63125	0.9407	1.63006	2.36374	2.90964	3.38158	3.59665	3.77715	3.8957
1560.1	0.14885	0.23703	0.33373	0.60772	0.90522	1.5682	2.27249	2.79667	3.2495	3.45622	3.62962	3.7427
1560.8	0.14356	0.2284	0.32136	0.58452	0.87146	1.50768	2.18474	2.6881	3.12327	3.31974	3.48709	3.59823
1561.5	0.13802	0.21958	0.30888	0.56183	0.83686	1.44711	2.09605	2.57953	2.99653	3.18646	3.34783	3.45377
1562.2	0.13257	0.21062	0.296	0.53777	0.80159	1.38549	2.00682	2.46913	2.86824	3.05144	3.20597	3.30822
1562.9	0.1273	0.20179	0.28385	0.51512	0.76728	1.32651	1.92132	2.36232	2.74416	2.92081	3.06729	3.16733
1563.6	0.12182	0.19297	0.27126	0.49204	0.73293	1.26622	1.83404	2.25551	2.61828	2.78744	2.9286	3.02337
1564.3	0.11642	0.18416	0.25893	0.46903	0.69896	1.20699	1.74825	2.15003	2.49524	2.65645	2.79232	2.88397
1565	0.11095	0.17555	0.24643	0.44627	0.66475	1.14817	1.66192	2.04336	2.37255	2.52757	2.65614	2.74278
1565.7	0.10552	0.16684	0.2342	0.42393	0.63133	1.08995	1.57837	1.94015	2.25123	2.39941	2.5215	2.60607
1566.4	0.10012	0.15838	0.22217	0.40189	0.59905	1.03302	1.49588	1.8384	2.1331	2.27355	2.39032	2.46885
1567.1	0.09511	0.15017	0.21071	0.38089	0.56721	0.97885	1.41742	1.74238	2.02073	2.15575	2.26337	2.34038
1567.8	0.09014	0.1422	0.19961	0.3605	0.53759	0.92662	1.34121	1.64834	1.91216	2.03795	2.14171	2.21458
1568.5	0.08549	0.1348	0.18896	0.34136	0.50809	0.87661	1.26855	1.55825	1.80892	1.92794	2.0261	2.09554
1569.2	0.08099	0.12732	0.17876	0.32271	0.48101	0.82927	1.20092	1.47419	1.71008	1.82306	1.91579	1.98235
1569.9	0.07671	0.1207	0.16935	0.30577	0.45535	0.78469	1.13607	1.39489	1.61812	1.72468	1.81327	1.87492
1570.6	0.07287	0.11453	0.16069	0.29007	0.43196	0.74391	1.07773	1.32388	1.534	1.63537	1.72008	1.77703
1571.3	0.06925	0.10887	0.15254	0.27567	0.41026	0.70697	1.024	1.25646	1.45719	1.55237	1.63256	1.68687
1572	0.06607	0.10361	0.14544	0.26266	0.39079	0.67347	0.97388	1.19682	1.38676	1.47772	1.55437	1.60506
1572.7	0.06303	0.09883	0.13842	0.2505	0.37261	0.64183	0.92921	1.14012	1.32167	1.40764	1.4807	1.52931
1573.4	0.06028	0.09465	0.13243	0.23978	0.35706	0.6146	0.8888	1.09156	1.26536	1.34618	1.41636	1.46378
1574.1	0.05797	0.09078	0.12732	0.22994	0.34289	0.5894	0.8527	1.04747	1.2137	1.29186	1.35788	1.40282
1574.8	0.05585	0.08732	0.12223	0.22156	0.32956	0.56731	0.81939	1.00705	1.1666	1.24084	1.30518	1.34771
1575.5	0.05386	0.08427	0.1179	0.2137	0.31743	0.54627	0.79034	0.97059	1.12518	1.19568	1.25796	1.29837
1576.2	0.05197	0.08132	0.11376	0.20597	0.30693	0.5275	0.76294	0.93677	1.08575	1.15317	1.21382	1.25279
1576.9	0.05038	0.07869	0.11007	0.19944	0.297	0.51038	0.73791	0.90625	1.05027	1.1158	1.17448	1.21199
1577.6	0.04877	0.07622	0.10656	0.1932	0.28705	0.49432	0.71436	0.87706	1.01678	1.08044	1.13697	1.17267
1578.3	0.04733	0.07377	0.10315	0.18715	0.27826	0.4783	0.69229	0.84962	0.98544	1.04664	1.10197	1.13653
1579	0.04595	0.07157	0.1	0.18151	0.26955	0.46357	0.67111	0.82387	0.95591	1.01513	1.0685	1.10357
1579.7	0.04456	0.06941	0.09714	0.17579	0.26162	0.44957	0.65087	0.79974	0.92577	0.98444	1.03695	1.071
1580.4	0.04331	0.0674	0.0941	0.17056	0.25354	0.43622	0.63111	0.77524	0.89873	0.95586	1.00502	1.03824
1581.1	0.04195	0.06529	0.09122	0.16523	0.24579	0.42259	0.61111	0.75118	0.87161	0.92747	0.97578	1.00716
1581.8	0.04063	0.06329	0.08831	0.1598	0.23793	0.40928	0.59265	0.72785	0.84415	0.89843	0.94616	0.97678
1582.5	0.03937	0.06131	0.08554	0.1547	0.23043	0.39621	0.57466	0.70474	0.81737	0.87058	0.91673	0.94689
1583.2	0.0381	0.05933	0.08281	0.14965	0.22288	0.38346	0.55602	0.68288	0.79145	0.84292	0.88711	0.91701
1583.9	0.03675	0.05733	0.08002	0.14444	0.21506	0.37027	0.53703	0.65897	0.76493	0.81416	0.8572	0.88593
1584.6	0.03572	0.05545	0.07744	0.13976	0.20804	0.35842	0.51952	0.63821	0.73996	0.78814	0.83018	0.85744
1585.3	0.03452	0.05359	0.0749	0.13527	0.20112	0.34648	0.50283	0.61708	0.71534	0.7624	0.80286	0.83083
1586	0.03336	0.05181	0.07239	0.13062	0.19424	0.33504	0.48597	0.59669	0.69166	0.73703	0.7767	0.80293
1586.7	0.03224	0.05017	0.07007	0.1263	0.18814	0.32411	0.47011	0.57666	0.66867	0.71239	0.75054	0.77662
1587.4	0.03123	0.04856	0.06775	0.12212	0.18195	0.31335	0.45502	0.55788	0.64525	0.6883	0.72487	0.75001
1588.1	0.0302	0.04691	0.06554	0.11819	0.17621	0.30311	0.43934	0.53918	0.62433	0.66539	0.7014	0.72608
1588.8	0.02926	0.04544	0.06348	0.11449	0.1706	0.29357	0.42532	0.52157	0.60452	0.64451	0.68005	0.70384
1589.5	0.02839	0.04415	0.0616	0.11096	0.16555	0.28479	0.41248	0.50631	0.58627	0.62536	0.65937	0.68279
1590.2	0.02762	0.04278	0.05978	0.10795	0.16094	0.27649	0.40011	0.49186	0.56939	0.60714	0.63985	0.66284
1590.9	0.02676	0.04163	0.05818	0.10508	0.15663	0.26905	0.3897	0.4788	0.55467	0.59019	0.62254	0.64516
1591.6	0.02614	0.04059	0.0566	0.10237	0.1528	0.26205	0.37981	0.46641	0.54098	0.57553	0.60753	0.62888
1592.3	0.02555	0.0396	0.05526	0.09996	0.14902	0.25598	0.37076	0.45569	0.52867	0.56225	0.59272	0.61419
1593	0.02502	0.03878	0.05419	0.09811	0.14624	0.25068	0.36301	0.44682	0.51825	0.55034	0.58147	0.60187
1593.7	0.02445	0.03795	0.05299	0.09614	0.14315	0.2457	0.35538	0.43816	0.50861	0.53935	0.56954	0.58996
1594.4	0.02389	0.03728	0.05189	0.09406	0.14044	0.24105	0.34857	0.42965	0.49888	0.52909	0.55916	0.57795
1595.1	0.02359	0.0365	0.0511	0.09247	0.13828	0.23696	0.34277	0.42239	0.49104	0.52048	0.54973	0.56951
1595.8	0.02306	0.03598	0.05004	0.09103	0.13592	0.23288	0.33703	0.41535	0.48303	0.51251	0.54079	0.55997
1596.5	0.02277	0.03537	0.04937	0.08968	0.13386	0.22992	0.33283	0.4108	0.47735	0.5061	0.53425	0.55273
1597.2	0.02257	0.03486	0.04863	0.08843	0.13172	0.2264	0.32828	0.40515	0.47063	0.49886	0.52655	0.54459
1597.9	0.02208	0.0343	0.04784	0.08701	0.13	0.22301	0.32295	0.3998	0.46392	0.49181	0.51915	0.53625
1598.6	0.02183	0.03373	0.04715	0.08591	0.12819	0.22001	0.31887	0.39407	0.45772	0.48476	0.51155	0.5293
1599.3	0.02143	0.03318	0.04643	0.0844	0.12595	0.21665	0.31443	0.38799	0.45049	0.47734	0.50395	0.52066
1600	0.02122	0.03273	0.0457	0.08297	0.12416	0.21301	0.30916	0.38219	0.443	0.46964	0.4952	0.51192
[truncated: 14 more columns]

## Sheet: Fig.3(a)
For 830 nm pumping (Fig. 3(a)					BEDF						EDF
Time (s)	BDF(BAC-Al at 1120 nm)	Time (s)	BEDF (BAC-Al at 1120 nm)		Time (s)	BAC-Si at 1430 nm	Time (s)	Er3+ at 1536 nm	Total One		Time (s)	Er3+ at 1536 nm
0	1	0	1		0	5	0	1.5	6.5		0	1.5
1.6e-06	0.99791	1.6e-06	0.99753		1.6e-05	4.85131	1.6e-05	1.49757	6.34888		1.6e-05	1.4978
3.2e-06	0.99582	3.2e-06	0.99507		3.2e-05	4.70705	3.2e-05	1.49513	6.20218		3.2e-05	1.4956
4.8e-06	0.99374	4.8e-06	0.99261		4.8e-05	4.56707	4.8e-05	1.49271	6.05978		4.8e-05	1.49341
6.4e-06	0.99166	6.4e-06	0.99016		6.4e-05	4.43126	6.4e-05	1.49029	5.92154		6.4e-05	1.49122
8e-06	0.98958	8e-06	0.98771		8e-05	4.29948	8e-05	1.48787	5.78735		8e-05	1.48903
9.6e-06	0.98751	9.6e-06	0.98527		9.6e-05	4.17163	9.6e-05	1.48545	5.65708		9.6e-05	1.48685
1.12e-05	0.98545	1.12e-05	0.98284		0.000112	4.04757	0.000112	1.48304	5.53061		0.000112	1.48467
1.28e-05	0.98339	1.28e-05	0.98041		0.000128	3.92721	0.000128	1.48063	5.40784		0.000128	1.48249
1.44e-05	0.98133	1.44e-05	0.97799		0.000144	3.81042	0.000144	1.47823	5.28865		0.000144	1.48031
1.6e-05	0.97928	1.6e-05	0.97557		0.00016	3.69711	0.00016	1.47583	5.17294		0.00016	1.47814
1.76e-05	0.97723	1.76e-05	0.97316		0.000176	3.58717	0.000176	1.47344	5.0606		0.000176	1.47597
1.92e-05	0.97518	1.92e-05	0.97076		0.000192	3.48049	0.000192	1.47104	4.95154		0.000192	1.47381
2.08e-05	0.97314	2.08e-05	0.96836		0.000208	3.37699	0.000208	1.46866	4.84565		0.000208	1.47165
2.24e-05	0.97111	2.24e-05	0.96597		0.000224	3.27657	0.000224	1.46627	4.74284		0.000224	1.46949
2.4e-05	0.96907	2.4e-05	0.96359		0.00024	3.17913	0.00024	1.46389	4.64302		0.00024	1.46733
2.56e-05	0.96705	2.56e-05	0.96121		0.000256	3.08459	0.000256	1.46152	4.54611		0.000256	1.46518
2.72e-05	0.96502	2.72e-05	0.95883		0.000272	2.99286	0.000272	1.45915	4.45201		0.000272	1.46303
2.88e-05	0.96301	2.88e-05	0.95646		0.000288	2.90386	0.000288	1.45678	4.36064		0.000288	1.46089
3.04e-05	0.96099	3.04e-05	0.9541		0.000304	2.81751	0.000304	1.45441	4.27192		0.000304	1.45874
3.2e-05	0.95898	3.2e-05	0.95174		0.00032	2.73372	0.00032	1.45205	4.18577		0.00032	1.4566
3.36e-05	0.95697	3.36e-05	0.94939		0.000336	2.65243	0.000336	1.4497	4.10212		0.000336	1.45447
3.52e-05	0.95497	3.52e-05	0.94705		0.000352	2.57355	0.000352	1.44734	4.02089		0.000352	1.45233
3.68e-05	0.95297	3.68e-05	0.94471		0.000368	2.49702	0.000368	1.44499	3.94201		0.000368	1.4502
3.84e-05	0.95098	3.84e-05	0.94238		0.000384	2.42277	0.000384	1.44265	3.86541		0.000384	1.44808
4e-05	0.94899	4e-05	0.94005		0.0004	2.35072	0.0004	1.44031	3.79102		0.0004	1.44595
4.16e-05	0.94701	4.16e-05	0.93773		0.000416	2.28081	0.000416	1.43797	3.71878		0.000416	1.44383
4.32e-05	0.94502	4.32e-05	0.93541		0.000432	2.21299	0.000432	1.43563	3.64862		0.000432	1.44171
4.48e-05	0.94305	4.48e-05	0.9331		0.000448	2.14718	0.000448	1.4333	3.58048		0.000448	1.4396
4.64e-05	0.94107	4.64e-05	0.9308		0.000464	2.08333	0.000464	1.43098	3.51431		0.000464	1.43749
4.8e-05	0.93911	4.8e-05	0.9285		0.00048	2.02137	0.00048	1.42866	3.45003		0.00048	1.43538
4.96e-05	0.93714	4.96e-05	0.9262		0.000496	1.96126	0.000496	1.42634	3.3876		0.000496	1.43327
5.12e-05	0.93518	5.12e-05	0.92392		0.000512	1.90294	0.000512	1.42402	3.32696		0.000512	1.43117
5.28e-05	0.93322	5.28e-05	0.92163		0.000528	1.84635	0.000528	1.42171	3.26806		0.000528	1.42907
5.44e-05	0.93127	5.44e-05	0.91936		0.000544	1.79145	0.000544	1.4194	3.21085		0.000544	1.42698
5.6e-05	0.92932	5.6e-05	0.91709		0.00056	1.73817	0.00056	1.4171	3.15527		0.00056	1.42488
5.76e-05	0.92738	5.76e-05	0.91482		0.000576	1.68648	0.000576	1.4148	3.10128		0.000576	1.42279
5.92e-05	0.92544	5.92e-05	0.91256		0.000592	1.63633	0.000592	1.4125	3.04883		0.000592	1.4207
6.08e-05	0.9235	6.08e-05	0.91031		0.000608	1.58767	0.000608	1.41021	2.99788		0.000608	1.41862
6.24e-05	0.92157	6.24e-05	0.90806		0.000624	1.54046	0.000624	1.40792	2.94838		0.000624	1.41654
6.4e-05	0.91964	6.4e-05	0.90582		0.00064	1.49465	0.00064	1.40564	2.90028		0.00064	1.41446
6.56e-05	0.91772	6.56e-05	0.90358		0.000656	1.4502	0.000656	1.40336	2.85356		0.000656	1.41239
6.72e-05	0.9158	6.72e-05	0.90135		0.000672	1.40708	0.000672	1.40108	2.80815		0.000672	1.41032
6.88e-05	0.91388	6.88e-05	0.89912		0.000688	1.36523	0.000688	1.3988	2.76404		0.000688	1.40825
7.04e-05	0.91197	7.04e-05	0.8969		0.000704	1.32463	0.000704	1.39653	2.72117		0.000704	1.40618
7.2e-05	0.91006	7.2e-05	0.89469		0.00072	1.28524	0.00072	1.39427	2.67951		0.00072	1.40412
7.36e-05	0.90816	7.36e-05	0.89248		0.000736	1.24702	0.000736	1.392	2.63903		0.000736	1.40206
7.52e-05	0.90626	7.52e-05	0.89027		0.000752	1.20994	0.000752	1.38974	2.59968		0.000752	1.4
7.68e-05	0.90436	7.68e-05	0.88807		0.000768	1.17396	0.000768	1.38749	2.56145		0.000768	1.39795
7.84e-05	0.90247	7.84e-05	0.88588		0.000784	1.13905	0.000784	1.38524	2.52428		0.000784	1.3959
8e-05	0.90058	8e-05	0.88369		0.0008	1.10518	0.0008	1.38299	2.48816		0.0008	1.39385
8.16e-05	0.8987	8.16e-05	0.88151		0.000816	1.07231	0.000816	1.38074	2.45305		0.000816	1.39181
8.32e-05	0.89682	8.32e-05	0.87933		0.000832	1.04042	0.000832	1.3785	2.41893		0.000832	1.38977
8.48e-05	0.89494	8.48e-05	0.87716		0.000848	1.00948	0.000848	1.37627	2.38575		0.000848	1.38773
8.64e-05	0.89307	8.64e-05	0.87499		0.000864	0.97946	0.000864	1.37403	2.35349		0.000864	1.38569
8.8e-05	0.8912	8.8e-05	0.87283		0.00088	0.95034	0.00088	1.3718	2.32214		0.00088	1.38366
8.96e-05	0.88934	8.96e-05	0.87068		0.000896	0.92208	0.000896	1.36958	2.29165		0.000896	1.38163
9.12e-05	0.88748	9.12e-05	0.86853		0.000912	0.89466	0.000912	1.36735	2.26201		0.000912	1.3796
9.28e-05	0.88562	9.28e-05	0.86638		0.000928	0.86805	0.000928	1.36513	2.23318		0.000928	1.37758
9.44e-05	0.88377	9.44e-05	0.86424		0.000944	0.84224	0.000944	1.36292	2.20515		0.000944	1.37556
9.6e-05	0.88192	9.6e-05	0.86211		0.00096	0.81719	0.00096	1.36071	2.1779		0.00096	1.37354
9.76e-05	0.88007	9.76e-05	0.85998		0.000976	0.79289	0.000976	1.3585	2.15139		0.000976	1.37153
9.92e-05	0.87823	9.92e-05	0.85785		0.000992	0.76931	0.000992	1.35629	2.1256		0.000992	1.36951
0.0001008	0.8764	0.0001008	0.85573		0.00101	0.74643	0.00101	1.35409	2.10052		0.00101	1.36751
0.0001024	0.87456	0.0001024	0.85362		0.00102	0.72424	0.00102	1.35189	2.07613		0.00102	1.3655
0.000104	0.87273	0.000104	0.85151		0.00104	0.7027	0.00104	1.3497	2.0524		0.00104	1.3635
0.0001056	0.87091	0.0001056	0.84941		0.00106	0.6818	0.00106	1.34751	2.02931		0.00106	1.3615
0.0001072	0.86909	0.0001072	0.84731		0.00107	0.66153	0.00107	1.34532	2.00685		0.00107	1.3595
0.0001088	0.86727	0.0001088	0.84522		0.00109	0.64186	0.00109	1.34314	1.98499		0.00109	1.35751
0.0001104	0.86545	0.0001104	0.84313		0.0011	0.62277	0.0011	1.34096	1.96373		0.0011	1.35551
0.000112	0.86364	0.000112	0.84105		0.00112	0.60425	0.00112	1.33878	1.94303		0.00112	1.35353
0.0001136	0.86184	0.0001136	0.83897		0.00114	0.58628	0.00114	1.33661	1.92289		0.00114	1.35154
0.0001152	0.86003	0.0001152	0.8369		0.00115	0.56885	0.00115	1.33444	1.90328		0.00115	1.34956
0.0001168	0.85823	0.0001168	0.83483		0.00117	0.55193	0.00117	1.33227	1.8842		0.00117	1.34758
0.0001184	0.85644	0.0001184	0.83277		0.00118	0.53552	0.00118	1.33011	1.86563		0.00118	1.3456
0.00012	0.85465	0.00012	0.83071		0.0012	0.51959	0.0012	1.32795	1.84754		0.0012	1.34363
0.0001216	0.85286	0.0001216	0.82866		0.00122	0.50414	0.00122	1.3258	1.82994		0.00122	1.34166
0.0001232	0.85107	0.0001232	0.82661		0.00123	0.48915	0.00123	1.32364	1.81279		0.00123	1.33969
0.0001248	0.84929	0.0001248	0.82457		0.00125	0.4746	0.00125	1.3215	1.7961		0.00125	1.33772
0.0001264	0.84752	0.0001264	0.82254		0.00126	0.46049	0.00126	1.31935	1.77984		0.00126	1.33576
0.000128	0.84574	0.000128	0.8205		0.00128	0.44679	0.00128	1.31721	1.764		0.00128	1.3338
0.0001296	0.84397	0.0001296	0.81848		0.0013	0.43351	0.0013	1.31507	1.74858		0.0013	1.33185
0.0001312	0.84221	0.0001312	0.81646		0.00131	0.42062	0.00131	1.31294	1.73355		0.00131	1.32989
0.0001328	0.84045	0.0001328	0.81444		0.00133	0.40811	0.00133	1.31081	1.71892		0.00133	1.32794
0.0001344	0.83869	0.0001344	0.81243		0.00134	0.39597	0.00134	1.30868	1.70465		0.00134	1.32599
0.000136	0.83693	0.000136	0.81042		0.00136	0.3842	0.00136	1.30656	1.69075		0.00136	1.32405
0.0001376	0.83518	0.0001376	0.80842		0.00138	0.37277	0.00138	1.30443	1.67721		0.00138	1.32211
0.0001392	0.83344	0.0001392	0.80642		0.00139	0.36169	0.00139	1.30232	1.664		0.00139	1.32017
0.0001408	0.83169	0.0001408	0.80443		0.00141	0.35093	0.00141	1.3002	1.65113		0.00141	1.31823
0.0001424	0.82995	0.0001424	0.80244		0.00142	0.3405	0.00142	1.29809	1.63859		0.00142	1.3163
0.000144	0.82822	0.000144	0.80046		0.00144	0.33037	0.00144	1.29599	1.62636		0.00144	1.31437
0.0001456	0.82648	0.0001456	0.79849		0.00146	0.32055	0.00146	1.29388	1.61443		0.00146	1.31244
0.0001472	0.82475	0.0001472	0.79651		0.00147	0.31101	0.00147	1.29178	1.6028		0.00147	1.31051
0.0001488	0.82303	0.0001488	0.79455		0.00149	0.30176	0.00149	1.28969	1.59145		0.00149	1.30859
0.0001504	0.82131	0.0001504	0.79258		0.0015	0.29279	0.0015	1.28759	1.58038		0.0015	1.30667
0.000152	0.81959	0.000152	0.79063		0.00152	0.28408	0.00152	1.2855	1.56959		0.00152	1.30476
0.0001536	0.81787	0.0001536	0.78867		0.00154	0.27564	0.00154	1.28342	1.55905		0.00154	1.30284
0.0001552	0.81616	0.0001552	0.78673		0.00155	0.26744	0.00155	1.28133	1.54877		0.00155	1.30093
0.0001568	0.81446	0.0001568	0.78478		0.00157	0.25949	0.00157	1.27925	1.53874		0.00157	1.29902
0.0001584	0.81275	0.0001584	0.78284		0.00158	0.25177	0.00158	1.27718	1.52895		0.00158	1.29712
0.00016	0.81105	0.00016	0.78091		0.0016	0.24428	0.0016	1.27511	1.51939		0.0016	1.29521
0.0001616	0.80935	0.0001616	0.77898		0.00162	0.23702	0.00162	1.27304	1.51005		0.00162	1.29331
0.0001632	0.80766	0.0001632	0.77706		0.00163	0.22997	0.00163	1.27097	1.50094		0.00163	1.29142
0.0001648	0.80597	0.0001648	0.77514		0.00165	0.22313	0.00165	1.26891	1.49204		0.00165	1.28952
0.0001664	0.80429	0.0001664	0.77322		0.00166	0.2165	0.00166	1.26685	1.48334		0.00166	1.28763
0.000168	0.8026	0.000168	0.77131		0.00168	0.21006	0.00168	1.26479	1.47485		0.00168	1.28574
0.0001696	0.80092	0.0001696	0.76941		0.0017	0.20381	0.0017	1.26274	1.46655		0.0017	1.28386
0.0001712	0.79925	0.0001712	0.76751		0.00171	0.19775	0.00171	1.26069	1.45844		0.00171	1.28197
0.0001728	0.79758	0.0001728	0.76561		0.00173	0.19187	0.00173	1.25864	1.45051		0.00173	1.28009
0.0001744	0.79591	0.0001744	0.76372		0.00174	0.18616	0.00174	1.2566	1.44276		0.00174	1.27822
0.000176	0.79424	0.000176	0.76184		0.00176	0.18063	0.00176	1.25456	1.43519		0.00176	1.27634
0.0001776	0.79258	0.0001776	0.75995		0.00178	0.17526	0.00178	1.25252	1.42778		0.00178	1.27447
0.0001792	0.79092	0.0001792	0.75808		0.00179	0.17004	0.00179	1.25049	1.42054		0.00179	1.2726
0.0001808	0.78927	0.0001808	0.7562		0.00181	0.16499	0.00181	1.24846	1.41345		0.00181	1.27073
0.0001824	0.78762	0.0001824	0.75434		0.00182	0.16008	0.00182	1.24643	1.40652		0.00182	1.26887
0.000184	0.78597	0.000184	0.75247		0.00184	0.15532	0.00184	1.24441	1.39973		0.00184	1.26701
0.0001856	0.78432	0.0001856	0.75061		0.00186	0.1507	0.00186	1.24239	1.39309		0.00186	1.26515
0.0001872	0.78268	0.0001872	0.74876		0.00187	0.14622	0.00187	1.24038	1.3866		0.00187	1.26329
0.0001888	0.78105	0.0001888	0.74691		0.00189	0.14187	0.00189	1.23836	1.38024		0.00189	1.26144
0.0001904	0.77941	0.0001904	0.74507		0.0019	0.13765	0.0019	1.23635	1.37401		0.0019	1.25959
0.000192	0.77778	0.000192	0.74323		0.00192	0.13356	0.00192	1.23435	1.36791		0.00192	1.25774
0.0001936	0.77615	0.0001936	0.74139		0.00194	0.12959	0.00194	1.23234	1.36193		0.00194	1.2559
0.0001952	0.77453	0.0001952	0.73956		0.00195	0.12573	0.00195	1.23034	1.35608		0.00195	1.25406
0.0001968	0.77291	0.0001968	0.73773		0.00197	0.122	0.00197	1.22835	1.35034		0.00197	1.25222
0.0001984	0.77129	0.0001984	0.73591		0.00198	0.11837	0.00198	1.22635	1.34472		0.00198	1.25038
0.0002	0.76968	0.0002	0.73409		0.002	0.11485	0.002	1.22436	1.33921		0.002	1.24854
0.0002016	0.76807	0.0002016	0.73228		0.00202	0.11143	0.00202	1.22237	1.33381		0.00202	1.24671
0.0002032	0.76646	0.0002032	0.73047		0.00203	0.10812	0.00203	1.22039	1.32851		0.00203	1.24488
0.0002048	0.76486	0.0002048	0.72867		0.00205	0.1049	0.00205	1.21841	1.32331		0.00205	1.24306
0.0002064	0.76326	0.0002064	0.72687		0.00206	0.10178	0.00206	1.21643	1.31822		0.00206	1.24124
0.000208	0.76166	0.000208	0.72507		0.00208	0.09876	0.00208	1.21446	1.31321		0.00208	1.23941
0.0002096	0.76007	0.0002096	0.72328		0.0021	0.09582	0.0021	1.21249	1.30831		0.0021	1.2376
0.0002112	0.75848	0.0002112	0.7215		0.00211	0.09297	0.00211	1.21052	1.30349		0.00211	1.23578
0.0002128	0.75689	0.0002128	0.71971		0.00213	0.09021	0.00213	1.20855	1.29876		0.00213	1.23397
0.0002144	0.75531	0.0002144	0.71794		0.00214	0.08752	0.00214	1.20659	1.29412		0.00214	1.23216
0.000216	0.75373	0.000216	0.71616		0.00216	0.08492	0.00216	1.20463	1.28955		0.00216	1.23035
0.0002176	0.75215	0.0002176	0.71439		0.00218	0.0824	0.00218	1.20268	1.28507		0.00218	1.22855
0.0002192	0.75058	0.0002192	0.71263		0.00219	0.07995	0.00219	1.20073	1.28067		0.00219	1.22674
0.0002208	0.74901	0.0002208	0.71087		0.00221	0.07757	0.00221	1.19878	1.27635		0.00221	1.22495
0.0002224	0.74744	0.0002224	0.70911		0.00222	0.07526	0.00222	1.19683	1.27209		0.00222	1.22315
0.000224	0.74588	0.000224	0.70736		0.00224	0.07302	0.00224	1.19489	1.26791		0.00224	1.22135
0.0002256	0.74432	0.0002256	0.70561		0.00226	0.07085	0.00226	1.19295	1.2638		0.00226	1.21956
0.0002272	0.74276	0.0002272	0.70387		0.00227	0.06874	0.00227	1.19101	1.25976		0.00227	1.21777
0.0002288	0.74121	0.0002288	0.70213		0.00229	0.0667	0.00229	1.18908	1.25578		0.00229	1.21599
0.0002304	0.73966	0.0002304	0.7004		0.0023	0.06472	0.0023	1.18715	1.25187		0.0023	1.2142
0.000232	0.73811	0.000232	0.69867		0.00232	0.06279	0.00232	1.18522	1.24802		0.00232	1.21242
0.0002336	0.73656	0.0002336	0.69694		0.00234	0.06093	0.00234	1.1833	1.24423		0.00234	1.21064
0.0002352	0.73502	0.0002352	0.69522		0.00235	0.05911	0.00235	1.18138	1.24049		0.00235	1.20887
0.0002368	0.73349	0.0002368	0.6935		0.00237	0.05736	0.00237	1.17946	1.23682		0.00237	1.2071
0.0002384	0.73195	0.0002384	0.69179		0.00238	0.05565	0.00238	1.17755	1.2332		0.00238	1.20533
0.00024	0.73042	0.00024	0.69008		0.0024	0.05399	0.0024	1.17564	1.22963		0.0024	1.20356
0.0002416	0.72889	0.0002416	0.68838		0.00242	0.05239	0.00242	1.17373	1.22612		0.00242	1.20179
0.0002432	0.72737	0.0002432	0.68668		0.00243	0.05083	0.00243	1.17182	1.22266		0.00243	1.20003
0.0002448	0.72584	0.0002448	0.68498		0.00245	0.04932	0.00245	1.16992	1.21924		0.00245	1.19827
0.0002464	0.72433	0.0002464	0.68329		0.00246	0.04785	0.00246	1.16802	1.21588		0.00246	1.19651
0.000248	0.72281	0.000248	0.6816		0.00248	0.04643	0.00248	1.16613	1.21256		0.00248	1.19476
0.0002496	0.7213	0.0002496	0.67992		0.0025	0.04505	0.0025	1.16423	1.20928		0.0025	1.193
0.0002512	0.71979	0.0002512	0.67824		0.00251	0.04371	0.00251	1.16235	1.20605		0.00251	1.19125
0.0002528	0.71828	0.0002528	0.67657		0.00253	0.04241	0.00253	1.16046	1.20287		0.00253	1.18951
0.0002544	0.71678	0.0002544	0.67489		0.00254	0.04115	0.00254	1.15858	1.19972		0.00254	1.18776
0.000256	0.71528	0.000256	0.67323		0.00256	0.03993	0.00256	1.15669	1.19662		0.00256	1.18602
0.0002576	0.71379	0.0002576	0.67156		0.00258	0.03874	0.00258	1.15482	1.19356		0.00258	1.18428
0.0002592	0.71229	0.0002592	0.66991		0.00259	0.03759	0.00259	1.15294	1.19053		0.00259	1.18254
0.0002608	0.7108	0.0002608	0.66825		0.00261	0.03647	0.00261	1.15107	1.18754		0.00261	1.18081
0.0002624	0.70932	0.0002624	0.6666		0.00262	0.03538	0.00262	1.1492	1.18459		0.00262	1.17908
0.000264	0.70783	0.000264	0.66495		0.00264	0.03433	0.00264	1.14734	1.18167		0.00264	1.17735
0.0002656	0.70635	0.0002656	0.66331		0.00266	0.03331	0.00266	1.14548	1.17879		0.00266	1.17562
0.0002672	0.70487	0.0002672	0.66167		0.00267	0.03232	0.00267	1.14362	1.17594		0.00267	1.1739
0.0002688	0.7034	0.0002688	0.66004		0.00269	0.03136	0.00269	1.14176	1.17312		0.00269	1.17217
0.0002704	0.70193	0.0002704	0.65841		0.0027	0.03043	0.0027	1.13991	1.17033		0.0027	1.17045
0.000272	0.70046	0.000272	0.65678		0.00272	0.02952	0.00272	1.13806	1.16758		0.00272	1.16874
0.0002736	0.69899	0.0002736	0.65516		0.00274	0.02864	0.00274	1.13621	1.16485		0.00274	1.16702
0.0002752	0.69753	0.0002752	0.65354		0.00275	0.02779	0.00275	1.13437	1.16216		0.00275	1.16531
0.0002768	0.69607	0.0002768	0.65193		0.00277	0.02697	0.00277	1.13253	1.15949		0.00277	1.1636
0.0002784	0.69461	0.0002784	0.65032		0.00278	0.02616	0.00278	1.13069	1.15685		0.00278	1.16189
0.00028	0.69316	0.00028	0.64871		0.0028	0.02539	0.0028	1.12885	1.18146		0.0028	1.16019
0.0002816	0.69171	0.0002816	0.64711		0.00282	0.02463	0.00282	1.12702	1.17992		0.00282	1.15849
0.0002832	0.69026	0.0002832	0.64551		0.00283	0.0239	0.00283	1.12519	1.17839		0.00283	1.15679
0.0002848	0.68882	0.0002848	0.64392		0.00285	0.02319	0.00285	1.12336	1.17685		0.00285	1.15509
0.0002864	0.68738	0.0002864	0.64233		0.00286	0.0225	0.00286	1.12154	1.17531		0.00286	1.1534
0.000288	0.68594	0.000288	0.64074		0.00288	0.02183	0.00288	1.11972	1.17378		0.00288	1.15171
0.0002896	0.68451	0.0002896	0.63916		0.0029	0.02118	0.0029	1.1179	1.17224		0.0029	1.15002
0.0002912	0.68307	0.0002912	0.63758		0.00291	0.02055	0.00291	1.11609	1.1707		0.00291	1.14833
0.0002928	0.68165	0.0002928	0.636		0.00293	0.01994	0.00293	1.11428	1.16917		0.00293	1.14665
0.0002944	0.68022	0.0002944	0.63443		0.00294	0.01935	0.00294	1.11247	1.16763		0.00294	1.14496
0.000296	0.6788	0.000296	0.63287		0.00296	0.01877	0.00296	1.11066	1.1661		0.00296	1.14328
0.0002976	0.67738	0.0002976	0.6313		0.00298	0.01821	0.00298	1.10886	1.16456		0.00298	1.14161
0.0002992	0.67596	0.0002992	0.62974		0.00299	0.01767	0.00299	1.10706	1.16302		0.00299	1.13993
0.0003008	0.67454	0.0003008	0.62819		0.00301	0.01715	0.00301	1.10526	1.16149		0.00301	1.13826
0.0003024	0.67313	0.0003024	0.62664		0.00302	0.01664	0.00302	1.10347	1.15995		0.00302	1.13659
0.000304	0.67173	0.000304	0.62509		0.00304	0.01614	0.00304	1.10168	1.15841		0.00304	1.13492
0.0003056	0.67032	0.0003056	0.62355		0.00306	0.01566	0.00306	1.09989	1.15688		0.00306	1.13326
0.0003072	0.66892	0.0003072	0.62201		0.00307	0.0152	0.00307	1.09811	1.15534		0.00307	1.1316
0.0003088	0.66752	0.0003088	0.62047		0.00309	0.01474	0.00309	1.09632	1.1538		0.00309	1.12994
0.0003104	0.66612	0.0003104	0.61894		0.0031	0.0143	0.0031	1.09454	1.15227		0.0031	1.12828
0.000312	0.66473	0.000312	0.61741		0.00312	0.01388	0.00312	1.09277	1.15073		0.00312	1.12663
0.0003136	0.66334	0.0003136	0.61588		0.00314	0.01347	0.00314	1.09099	1.14919		0.00314	1.12497
0.0003152	0.66195	0.0003152	0.61436		0.00315	0.01307	0.00315	1.08922	1.14766		0.00315	1.12332
0.0003168	0.66057	0.0003168	0.61284		0.00317	0.01268	0.00317	1.08746	1.14612		0.00317	1.12167
0.0003184	0.65918	0.0003184	0.61133		0.00318	0.0123	0.00318	1.08569	1.14458		0.00318	1.12003
0.00032	0.6578	0.00032	0.60982		0.0032	0.01193	0.0032	1.08393	1.14305		0.0032	1.11839
0.0003216	0.65643	0.0003216	0.60831		0.00322	0.01158	0.00322	1.08217	1.14151		0.00322	1.11675
0.0003232	0.65505	0.0003232	0.60681		0.00323	0.01124	0.00323	1.08041	1.13997		0.00323	1.11511
0.0003248	0.65368	0.0003248	0.60531		0.00325	0.0109	0.00325	1.07866	1.13844		0.00325	1.11347
0.0003264	0.65232	0.0003264	0.60382		0.00326	0.01058	0.00326	1.07691	1.1369		0.00326	1.11184
0.000328	0.65095	0.000328	0.60233		0.00328	0.01026	0.00328	1.07516	1.13536		0.00328	1.11021
0.0003296	0.64959	0.0003296	0.60084		0.0033	0.00996	0.0033	1.07342	1.13383		0.0033	1.10858
0.0003312	0.64823	0.0003312	0.59936		0.00331	0.00966	0.00331	1.07167	1.13229		0.00331	1.10695
0.0003328	0.64688	0.0003328	0.59787		0.00333	0.00937	0.00333	1.06993	1.13076		0.00333	1.10533
0.0003344	0.64552	0.0003344	0.5964		0.00334	0.0091	0.00334	1.0682	1.12922		0.00334	1.10371
0.000336	0.64417	0.000336	0.59492		0.00336	0.00882	0.00336	1.06646	1.12768		0.00336	1.10209
0.0003376	0.64282	0.0003376	0.59346		0.00338	0.00856	0.00338	1.06473	1.12615		0.00338	1.10047
0.0003392	0.64148	0.0003392	0.59199		0.00339	0.00831	0.00339	1.063	1.12461		0.00339	1.09886
0.0003408	0.64014	0.0003408	0.59053		0.00341	0.00806	0.00341	1.06128	1.12307		0.00341	1.09725
0.0003424	0.6388	0.0003424	0.58907		0.00342	0.00782	0.00342	1.05956	1.12154		0.00342	1.09564
0.000344	0.63746	0.000344	0.58761		0.00344	0.00759	0.00344	1.05784	1.12		0.00344	1.09403
0.0003456	0.63613	0.0003456	0.58616		0.00346	0.00736	0.00346	1.05612	1.11846		0.00346	1.09243
0.0003472	0.6348	0.0003472	0.58472		0.00347	0.00714	0.00347	1.05441	1.11693		0.00347	1.09082
0.0003488	0.63347	0.0003488	0.58327		0.00349	0.00693	0.00349	1.05269	1.11539		0.00349	1.08922
0.0003504	0.63214	0.0003504	0.58183		0.0035	0.00673	0.0035	1.05099	1.11385		0.0035	1.08763
0.000352	0.63082	0.000352	0.58039		0.00352	0.00653	0.00352	1.04928	1.11232		0.00352	1.08603
0.0003536	0.6295	0.0003536	0.57896		0.00354	0.00633	0.00354	1.04758	1.11078		0.00354	1.08444
0.0003552	0.62818	0.0003552	0.57753		0.00355	0.00614	0.00355	1.04588	1.10924		0.00355	1.08285
0.0003568	0.62687	0.0003568	0.5761		0.00357	0.00596	0.00357	1.04418	1.10771		0.00357	1.08126
0.0003584	0.62556	0.0003584	0.57468		0.00358	0.00578	0.00358	1.04248	1.10617		0.00358	1.07967
0.00036	0.62425	0.00036	0.57326		0.0036	0.00561	0.0036	1.04079	1.10463		0.0036	1.07809
0.0003616	0.62294	0.0003616	0.57185		0.00362	0.00544	0.00362	1.0391	1.1031		0.00362	1.07651
0.0003632	0.62164	0.0003632	0.57043		0.00363	0.00528	0.00363	1.03742	1.10156		0.00363	1.07493
0.0003648	0.62034	0.0003648	0.56902		0.00365	0.00513	0.00365	1.03573	1.10002		0.00365	1.07335
0.0003664	0.61904	0.0003664	0.56762		0.00366	0.00497	0.00366	1.03405	1.09849		0.00366	1.07178
0.000368	0.61775	0.000368	0.56622		0.00368	0.00482	0.00368	1.03237	1.09695		0.00368	1.07021
0.0003696	0.61646	0.0003696	0.56482		0.0037	0.00468	0.0037	1.0307	1.09542		0.0037	1.06864
0.0003712	0.61517	0.0003712	0.56342		0.00371	0.00454	0.00371	1.02903	1.09388		0.00371	1.06707
0.0003728	0.61388	0.0003728	0.56203		0.00373	0.00441	0.00373	1.02736	1.09234		0.00373	1.0655
0.0003744	0.61259	0.0003744	0.56064		0.00374	0.00428	0.00374	1.02569	1.09081		0.00374	1.06394
0.000376	0.61131	0.000376	0.55926		0.00376	0.00415	0.00376	1.02402	1.08927		0.00376	1.06238
0.0003776	0.61003	0.0003776	0.55788		0.00378	0.00403	0.00378	1.02236	1.08773		0.00378	1.06082
0.0003792	0.60876	0.0003792	0.5565		0.00379	0.00391	0.00379	1.0207	1.0862		0.00379	1.05926
0.0003808	0.60748	0.0003808	0.55512		0.00381	0.00379	0.00381	1.01905	1.08466		0.00381	1.05771
0.0003824	0.60621	0.0003824	0.55375		0.00382	0.00368	0.00382	1.01739	1.08312		0.00382	1.05616
0.000384	0.60494	0.000384	0.55239		0.00384	0.00357	0.00384	1.01574	1.08159		0.00384	1.05461
0.0003856	0.60368	0.0003856	0.55102		0.00386	0.00346	0.00386	1.01409	1.08005		0.00386	1.05306
0.0003872	0.60242	0.0003872	0.54966		0.00387	0.00336	0.00387	1.01245	1.07851		0.00387	1.05152
0.0003888	0.60116	0.0003888	0.5483		0.00389	0.00326	0.00389	1.0108	1.07698		0.00389	1.04998
0.0003904	0.5999	0.0003904	0.54695		0.0039	0.00316	0.0039	1.00916	1.07544		0.0039	1.04844
0.000392	0.59864	0.000392	0.5456		0.00392	0.00307	0.00392	1.00752	1.0739		0.00392	1.0469
0.0003936	0.59739	0.0003936	0.54425		0.00394	0.00298	0.00394	1.00589	1.07237		0.00394	1.04536
0.0003952	0.59614	0.0003952	0.54291		0.00395	0.00289	0.00395	1.00426	1.07083		0.00395	1.04383
0.0003968	0.59489	0.0003968	0.54157		0.00397	0.0028	0.00397	1.00263	1.06929		0.00397	1.0423
0.0003984	0.59365	0.0003984	0.54023		0.00398	0.00272	0.00398	1.001	1.06776		0.00398	1.04077
0.0004	0.59241	0.0004	0.53889		0.004	0.00264	0.004	0.99937	1.06622		0.004	1.03924
0.0004016	0.59117	0.0004016	0.53756		0.00402	0.00256	0.00402	0.99775	1.06468		0.00402	1.03772
0.0004032	0.58993	0.0004032	0.53623		0.00403	0.00248	0.00403	0.99613	1.06315		0.00403	1.0362
0.0004048	0.5887	0.0004048	0.53491		0.00405	0.00241	0.00405	0.99452	1.06161		0.00405	1.03468
0.0004064	0.58747	0.0004064	0.53359		0.00406	0.00234	0.00406	0.9929	1.06007		0.00406	1.03316
0.000408	0.58624	0.000408	0.53227		0.00408	0.00227	0.00408	0.99129	1.05854		0.00408	1.03164
0.0004096	0.58501	0.0004096	0.53096		0.0041	0.0022	0.0041	0.98968	1.057		0.0041	1.03013
0.0004112	0.58379	0.0004112	0.52964		0.00411	0.00214	0.00411	0.98807	1.05547		0.00411	1.02862
0.0004128	0.58257	0.0004128	0.52834		0.00413	0.00207	0.00413	0.98647	1.05393		0.00413	1.02711
0.0004144	0.58135	0.0004144	0.52703		0.00414	0.00201	0.00414	0.98487	1.05239		0.00414	1.0256
0.000416	0.58013	0.000416	0.52573		0.00416	0.00195	0.00416	0.98327	1.05086		0.00416	1.0241
0.0004176	0.57892	0.0004176	0.52443		0.00418	0.00189	0.00418	0.98168	1.04932		0.00418	1.0226
0.0004192	0.57771	0.0004192	0.52314		0.00419	0.00184	0.00419	0.98008	1.04778		0.00419	1.0211
0.0004208	0.5765	0.0004208	0.52184		0.00421	0.00178	0.00421	0.97849	1.04625		0.00421	1.0196
0.0004224	0.57529	0.0004224	0.52056		0.00422	0.00173	0.00422	0.9769	1.04471		0.00422	1.0181
0.000424	0.57409	0.000424	0.51927		0.00424	0.00168	0.00424	0.97532	1.04317		0.00424	1.01661
0.0004256	0.57289	0.0004256	0.51799		0.00426	0.00163	0.00426	0.97373	1.04164		0.00426	1.01512
0.0004272	0.57169	0.0004272	0.51671		0.00427	0.00158	0.00427	0.97215	1.0401		0.00427	1.01363
0.0004288	0.57049	0.0004288	0.51543		0.00429	0.00153	0.00429	0.97058	1.03856		0.00429	1.01214
0.0004304	0.5693	0.0004304	0.51416		0.0043	0.00149	0.0043	0.969	1.03703		0.0043	1.01066
0.000432	0.56811	0.000432	0.51289		0.00432	0.00144	0.00432	0.96743	1.03549		0.00432	1.00918
0.0004336	0.56692	0.0004336	0.51162		0.00434	0.0014	0.00434	0.96586	1.03395		0.00434	1.0077
0.0004352	0.56573	0.0004352	0.51036		0.00435	0.00136	0.00435	0.96429	1.03242		0.00435	1.00622
0.0004368	0.56455	0.0004368	0.5091		0.00437	0.00132	0.00437	0.96273	1.03088		0.00437	1.00474
0.0004384	0.56337	0.0004384	0.50784		0.00438	0.00128	0.00438	0.96116	1.02934		0.00438	1.00327
0.00044	0.56219	0.00044	0.50659		0.0044	0.00124	0.0044	0.9596	1.02781		0.0044	1.0018
0.0004416	0.56101	0.0004416	0.50533		0.00442	0.0012	0.00442	0.95805	1.02627		0.00442	1.00033
0.0004432	0.55984	0.0004432	0.50409		0.00443	0.00117	0.00443	0.95649	1.02473		0.00443	0.99886
0.0004448	0.55867	0.0004448	0.50284		0.00445	0.00113	0.00445	0.95494	1.0232		0.00445	0.9974
0.0004464	0.5575	0.0004464	0.5016		0.00446	0.0011	0.00446	0.95339	1.02166		0.00446	0.99593
0.000448	0.55633	0.000448	0.50036		0.00448	0.00107	0.00448	0.95184	1.02013		0.00448	0.99447
0.0004496	0.55517	0.0004496	0.49912		0.0045	0.00103	0.0045	0.9503	1.01859		0.0045	0.99301
0.0004512	0.55401	0.0004512	0.49789		0.00451	0.001	0.00451	0.94875	1.01705		0.00451	0.99156
0.0004528	0.55285	0.0004528	0.49666		0.00453	0.000974137	0.00453	0.94721	1.01552		0.00453	0.9901
0.0004544	0.55169	0.0004544	0.49544		0.00454	0.000945169	0.00454	0.94568	1.01398		0.00454	0.98865
0.000456	0.55054	0.000456	0.49421		0.00456	0.000917062	0.00456	0.94414	1.01244		0.00456	0.9872
0.0004576	0.54939	0.0004576	0.49299		0.00458	0.000889791	0.00458	0.94261	1.01091		0.00458	0.98575
0.0004592	0.54824	0.0004592	0.49177		0.00459	0.00086333	0.00459	0.94108	1.00937		0.00459	0.98431
0.0004608	0.54709	0.0004608	0.49056		0.00461	0.000837657	0.00461	0.93955	1.00783		0.00461	0.98286
0.0004624	0.54595	0.0004624	0.48935		0.00462	0.000812747	0.00462	0.93803	1.0063		0.00462	0.98142
0.000464	0.5448	0.000464	0.48814		0.00464	0.000788578	0.00464	0.9365	1.00476		0.00464	0.97998
0.0004656	0.54366	0.0004656	0.48693		0.00466	0.000765128	0.00466	0.93498	1.00322		0.00466	0.97854
0.0004672	0.54253	0.0004672	0.48573		0.00467	0.000742375	0.00467	0.93347	1.00169		0.00467	0.97711
0.0004688	0.54139	0.0004688	0.48453		0.00469	0.000720298	0.00469	0.93195	1.00015		0.00469	0.97567
0.0004704	0.54026	0.0004704	0.48333		0.0047	0.000698878	0.0047	0.93044	0.99861		0.0047	0.97424
0.000472	0.53913	0.000472	0.48214		0.00472	0.000678095	0.00472	0.92893	0.99708		0.00472	0.97281
0.0004736	0.538	0.0004736	0.48095		0.00474	0.000657931	0.00474	0.92742	0.99554		0.00474	0.97139
0.0004752	0.53688	0.0004752	0.47976		0.00475	0.000638365	0.00475	0.92592	0.994		0.00475	0.96996
0.0004768	0.53575	0.0004768	0.47858		0.00477	0.000619382	0.00477	0.92441	0.99247		0.00477	0.96854
0.0004784	0.53463	0.0004784	0.47739		0.00478	0.000600963	0.00478	0.92291	0.99093		0.00478	0.96712
0.00048	0.53351	0.00048	0.47622		0.0048	0.000583092	0.0048	0.92142	0.98939		0.0048	0.9657
0.0004816	0.5324	0.0004816	0.47504		0.00482	0.000565752	0.00482	0.91992	0.98786		0.00482	0.96428
0.0004832	0.53128	0.0004832	0.47387		0.00483	0.000548928	0.00483	0.91843	0.98632		0.00483	0.96287
0.0004848	0.53017	0.0004848	0.4727		0.00485	0.000532604	0.00485	0.91694	0.98479		0.00485	0.96146
0.0004864	0.52906	0.0004864	0.47153		0.00486	0.000516766	0.00486	0.91545	0.98325		0.00486	0.96005
0.000488	0.52796	0.000488	0.47036		0.00488	0.000501399	0.00488	0.91396	0.98171		0.00488	0.95864
0.0004896	0.52685	0.0004896	0.4692		0.0049	0.000486488	0.0049	0.91248	0.98018		0.0049	0.95723
0.0004912	0.52575	0.0004912	0.46804		0.00491	0.000472021	0.00491	0.911	0.97864		0.00491	0.95583
0.0004928	0.52465	0.0004928	0.46689		0.00493	0.000457984	0.00493	0.90952	0.9771		0.00493	0.95443
0.0004944	0.52355	0.0004944	0.46573		0.00494	0.000444365	0.00494	0.90804	0.97557		0.00494	0.95303
0.000496	0.52246	0.000496	0.46458		0.00496	0.000431151	0.00496	0.90657	0.97403		0.00496	0.95163
0.0004976	0.52136	0.0004976	0.46344		0.00498	0.000418329	0.00498	0.9051	0.97249		0.00498	0.95023
0.0004992	0.52027	0.0004992	0.46229		0.00499	0.000405889	0.00499	0.90363	0.97096		0.00499	0.94884
0.0005008	0.51918	0.0005008	0.46115		0.00501	0.000393819	0.00501	0.90216	0.96942		0.00501	0.94745
0.0005024	0.5181	0.0005024	0.46001		0.00502	0.000382108	0.00502	0.9007	0.96788		0.00502	0.94606
0.000504	0.51701	0.000504	0.45887		0.00504	0.000370745	0.00504	0.89924	0.96635		0.00504	0.94467
0.0005056	0.51593	0.0005056	0.45774		0.00506	0.00035972	0.00506	0.89778	0.96481		0.00506	0.94328
0.0005072	0.51485	0.0005072	0.45661		0.00507	0.000349023	0.00507	0.89632	0.96327		0.00507	0.9419
0.0005088	0.51378	0.0005088	0.45548		0.00509	0.000338644	0.00509	0.89486	0.96174		0.00509	0.94052
0.0005104	0.5127	0.0005104	0.45436		0.0051	0.000328573	0.0051	0.89341	0.9602		0.0051	0.93914
0.000512	0.51163	0.000512	0.45323		0.00512	0.000318802	0.00512	0.89196	0.95866		0.00512	0.93776
0.0005136	0.51056	0.0005136	0.45212		0.00514	0.000309322	0.00514	0.89051	0.95713		0.00514	0.93639
0.0005152	0.50949	0.0005152	0.451		0.00515	0.000300123	0.00515	0.88907	0.95559		0.00515	0.93501
0.0005168	0.50842	0.0005168	0.44988		0.00517	0.000291198	0.00517	0.88763	0.95405		0.00517	0.93364
0.0005184	0.50736	0.0005184	0.44877		0.00518	0.000282539	0.00518	0.88619	0.95252		0.00518	0.93227
0.00052	0.5063	0.00052	0.44767		0.0052	0.000274137	0.0052	0.88475	0.95098		0.0052	0.9309
0.0005216	0.50524	0.0005216	0.44656		0.00522	0.000265985	0.00522	0.88331	0.94944		0.00522	0.92954
0.0005232	0.50418	0.0005232	0.44546		0.00523	0.000258075	0.00523	0.88188	0.94791		0.00523	0.92818
0.0005248	0.50313	0.0005248	0.44436		0.00525	0.000250401	0.00525	0.88045	0.94637		0.00525	0.92681
0.0005264	0.50208	0.0005264	0.44326		0.00526	0.000242954	0.00526	0.87902	0.94484		0.00526	0.92545
0.000528	0.50102	0.000528	0.44216		0.00528	0.000235729	0.00528	0.87759	0.9433		0.00528	0.9241
0.0005296	0.49998	0.0005296	0.44107		0.0053	0.000228719	0.0053	0.87617	0.94176		0.0053	0.92274
0.0005312	0.49893	0.0005312	0.43998		0.00531	0.000221918	0.00531	0.87474	0.94023		0.00531	0.92139
0.0005328	0.49789	0.0005328	0.4389		0.00533	0.000215318	0.00533	0.87332	0.93869		0.00533	0.92004
0.0005344	0.49685	0.0005344	0.43781		0.00534	0.000208915	0.00534	0.87191	0.93715		0.00534	0.91869
0.000536	0.49581	0.000536	0.43673		0.00536	0.000202703	0.00536	0.87049	0.93562		0.00536	0.91734
0.0005376	0.49477	0.0005376	0.43565		0.00538	0.000196675	0.00538	0.86908	0.93408		0.00538	0.91599
0.0005392	0.49373	0.0005392	0.43458		0.00539	0.000190826	0.00539	0.86767	0.93254		0.00539	0.91465
0.0005408	0.4927	0.0005408	0.4335		0.00541	0.000185152	0.00541	0.86626	0.93101		0.00541	0.91331
0.0005424	0.49167	0.0005424	0.43243		0.00542	0.000179646	0.00542	0.86485	0.92947		0.00542	0.91197
0.000544	0.49064	0.000544	0.43136		0.00544	0.000174303	0.00544	0.86345	0.92793		0.00544	0.91063
0.0005456	0.48961	0.0005456	0.4303		0.00546	0.00016912	0.00546	0.86205	0.9264		0.00546	0.9093
0.0005472	0.48859	0.0005472	0.42924		0.00547	0.000164091	0.00547	0.86065	0.92486		0.00547	0.90796
0.0005488	0.48757	0.0005488	0.42818		0.00549	0.000159211	0.00549	0.85925	0.92332		0.00549	0.90663
0.0005504	0.48655	0.0005504	0.42712		0.0055	0.000154477	0.0055	0.85786	0.92179		0.0055	0.9053
0.000552	0.48553	0.000552	0.42606		0.00552	0.000149883	0.00552	0.85647	0.92025		0.00552	0.90397
0.0005536	0.48451	0.0005536	0.42501		0.00554	0.000145426	0.00554	0.85508	0.91871		0.00554	0.90265
0.0005552	0.4835	0.0005552	0.42396		0.00555	0.000141101	0.00555	0.85369	0.91718		0.00555	0.90132
0.0005568	0.48249	0.0005568	0.42291		0.00557	0.000136905	0.00557	0.8523	0.91564		0.00557	0.9
0.0005584	0.48148	0.0005584	0.42187		0.00558	0.000132834	0.00558	0.85092	0.9141		0.00558	0.89868
0.00056	0.48047	0.00056	0.42083		0.0056	0.000128884	0.0056	0.84954	0.91257		0.0056	0.89736
0.0005616	0.47947	0.0005616	0.41979		0.00562	0.000125051	0.00562	0.84816	0.91103		0.00562	0.89605
0.0005632	0.47846	0.0005632	0.41875		0.00563	0.000121332	0.00563	0.84678	0.9095		0.00563	0.89473
0.0005648	0.47746	0.0005648	0.41772		0.00565	0.000117724	0.00565	0.84541	0.90796		0.00565	0.89342
0.0005664	0.47646	0.0005664	0.41668		0.00566	0.000114223	0.00566	0.84404	0.90642		0.00566	0.89211
0.000568	0.47547	0.000568	0.41566		0.00568	0.000110827	0.00568	0.84267	0.90489		0.00568	0.8908
0.0005696	0.47447	0.0005696	0.41463		0.0057	0.000107531	0.0057	0.8413	0.90335		0.0057	0.88949
0.0005712	0.47348	0.0005712	0.4136		0.00571	0.000104333	0.00571	0.83993	0.90181		0.00571	0.88819
0.0005728	0.47249	0.0005728	0.41258		0.00573	0.000101231	0.00573	0.83857	0.90028		0.00573	0.88689
0.0005744	0.4715	0.0005744	0.41156		0.00574	9.82203e-05	0.00574	0.83721	0.89874		0.00574	0.88558
0.000576	0.47052	0.000576	0.41055		0.00576	9.52994e-05	0.00576	0.83585	0.8972		0.00576	0.88429
0.0005776	0.46953	0.0005776	0.40953		0.00578	9.24655e-05	0.00578	0.83449	0.89567		0.00578	0.88299
0.0005792	0.46855	0.0005792	0.40852		0.00579	8.97158e-05	0.00579	0.83314	0.89413		0.00579	0.88169
0.0005808	0.46757	0.0005808	0.40751		0.00581	8.70478e-05	0.00581	0.83179	0.89259		0.00581	0.8804
0.0005824	0.46659	0.0005824	0.40651		0.00582	8.44593e-05	0.00582	0.83044	0.89106		0.00582	0.87911
0.000584	0.46561	0.000584	0.4055		0.00584	8.19476e-05	0.00584	0.82909	0.88952		0.00584	0.87782
0.0005856	0.46464	0.0005856	0.4045		0.00586	7.95107e-05	0.00586	0.82774	0.88798		0.00586	0.87653
0.0005872	0.46367	0.0005872	0.4035		0.00587	7.71463e-05	0.00587	0.8264	0.88645		0.00587	0.87525
0.0005888	0.4627	0.0005888	0.40251		0.00589	7.48521e-05	0.00589	0.82506	0.88491		0.00589	0.87396
0.0005904	0.46173	0.0005904	0.40151		0.0059	7.26262e-05	0.0059	0.82372	0.88337		0.0059	0.87268
0.000592	0.46076	0.000592	0.40052		0.00592	7.04665e-05	0.00592	0.82238	0.882		0.00592	0.8714
0.0005936	0.4598	0.0005936	0.39953		0.00594	6.8371e-05	0.00594	0.82105	0.88083		0.00594	0.87012
0.0005952	0.45884	0.0005952	0.39854		0.00595	6.63378e-05	0.00595	0.81971	0.87967		0.00595	0.86885
0.0005968	0.45788	0.0005968	0.39756		0.00597	6.43651e-05	0.00597	0.81838	0.8785		0.00597	0.86757
0.0005984	0.45692	0.0005984	0.39658		0.00598	6.2451e-05	0.00598	0.81706	0.87733		0.00598	0.8663
0.0006	0.45596	0.0006	0.3956		0.006	6.05939e-05	0.006	0.81573	0.87617		0.006	0.86503
0.0006016	0.45501	0.0006016	0.39462		0.00602	5.8792e-05	0.00602	0.81441	0.875		0.00602	0.86376
0.0006032	0.45406	0.0006032	0.39365		0.00603	5.70436e-05	0.00603	0.81308	0.87383		0.00603	0.86249
0.0006048	0.45311	0.0006048	0.39267		0.00605	5.53473e-05	0.00605	0.81176	0.87267		0.00605	0.86123
0.0006064	0.45216	0.0006064	0.3917		0.00606	5.37014e-05	0.00606	0.81045	0.8715		0.00606	0.85996
0.000608	0.45121	0.000608	0.39074		0.00608	5.21044e-05	0.00608	0.80913	0.87033		0.00608	0.8587
0.0006096	0.45027	0.0006096	0.38977		0.0061	5.0555e-05	0.0061	0.80782	0.86917		0.0061	0.85744
0.0006112	0.44933	0.0006112	0.38881		0.00611	4.90516e-05	0.00611	0.80651	0.868		0.00611	0.85618
0.0006128	0.44839	0.0006128	0.38785		0.00613	4.75929e-05	0.00613	0.8052	0.86683		0.00613	0.85493
0.0006144	0.44745	0.0006144	0.38689		0.00614	4.61776e-05	0.00614	0.80389	0.86567		0.00614	0.85368
0.000616	0.44651	0.000616	0.38593		0.00616	4.48044e-05	0.00616	0.80259	0.8645		0.00616	0.85242
0.0006176	0.44558	0.0006176	0.38498		0.00618	4.34721e-05	0.00618	0.80128	0.86333		0.00618	0.85117
0.0006192	0.44465	0.0006192	0.38403		0.00619	4.21793e-05	0.00619	0.79998	0.86217		0.00619	0.84992
0.0006208	0.44372	0.0006208	0.38308		0.00621	4.0925e-05	0.00621	0.79868	0.861		0.00621	0.84868
0.0006224	0.44279	0.0006224	0.38214		0.00622	3.9708e-05	0.00622	0.79739	0.85983		0.00622	0.84743
0.000624	0.44186	0.000624	0.38119		0.00624	3.85272e-05	0.00624	0.79609	0.85867		0.00624	0.84619
0.0006256	0.44094	0.0006256	0.38025		0.00626	3.73815e-05	0.00626	0.7948	0.8575		0.00626	0.84495
0.0006272	0.44002	0.0006272	0.37931		0.00627	3.62698e-05	0.00627	0.79351	0.85633		0.00627	0.84371
0.0006288	0.4391	0.0006288	0.37837		0.00629	3.51913e-05	0.00629	0.79222	0.85517		0.00629	0.84247
0.0006304	0.43818	0.0006304	0.37744		0.0063	3.41448e-05	0.0063	0.79094	0.854		0.0063	0.84124
0.000632	0.43726	0.000632	0.37651		0.00632	3.31294e-05	0.00632	0.78965	0.85283		0.00632	0.84
0.0006336	0.43635	0.0006336	0.37558		0.00634	3.21442e-05	0.00634	0.78837	0.85167		0.00634	0.83877
0.0006352	0.43543	0.0006352	0.37465		0.00635	3.11883e-05	0.00635	0.78709	0.8505		0.00635	0.83754
0.0006368	0.43452	0.0006368	0.37373		0.00637	3.02608e-05	0.00637	0.78582	0.84933		0.00637	0.83631
0.0006384	0.43361	0.0006384	0.3728		0.00638	2.93609e-05	0.00638	0.78454	0.84817		0.00638	0.83508
0.00064	0.43271	0.00064	0.37188		0.0064	2.84878e-05	0.0064	0.78327	0.847		0.0064	0.83386
0.0006416	0.4318	0.0006416	0.37096		0.00642	2.76407e-05	0.00642	0.782	0.84583		0.00642	0.83264
0.0006432	0.4309	0.0006432	0.37005		0.00643	2.68187e-05	0.00643	0.78073	0.84467		0.00643	0.83141
0.0006448	0.43	0.0006448	0.36913		0.00645	2.60212e-05	0.00645	0.77946	0.8435		0.00645	0.8302
0.0006464	0.4291	0.0006464	0.36822		0.00646	2.52474e-05	0.00646	0.77819	0.84233		0.00646	0.82898
0.000648	0.4282	0.000648	0.36731		0.00648	2.44966e-05	0.00648	0.77693	0.84117		0.00648	0.82776
0.0006496	0.4273	0.0006496	0.3664		0.0065	2.37681e-05	0.0065	0.77567	0.84		0.0065	0.82655
0.0006512	0.42641	0.0006512	0.3655		0.00651	2.30613e-05	0.00651	0.77441	0.83883		0.00651	0.82533
0.0006528	0.42552	0.0006528	0.3646		0.00653	2.23755e-05	0.00653	0.77315	0.83767		0.00653	0.82412
0.0006544	0.42463	0.0006544	0.3637		0.00654	2.17101e-05	0.00654	0.7719	0.8365		0.00654	0.82292
0.000656	0.42374	0.000656	0.3628		0.00656	2.10645e-05	0.00656	0.77065	0.83533		0.00656	0.82171
0.0006576	0.42285	0.0006576	0.3619		0.00658	2.04381e-05	0.00658	0.7694	0.83417		0.00658	0.8205
0.0006592	0.42197	0.0006592	0.36101		0.00659	1.98303e-05	0.00659	0.76815	0.833		0.00659	0.8193
0.0006608	0.42108	0.0006608	0.36012		0.00661	1.92406e-05	0.00661	0.7669	0.83184		0.00661	0.8181
0.0006624	0.4202	0.0006624	0.35923		0.00662	1.86685e-05	0.00662	0.76566	0.83067		0.00662	0.8169
0.000664	0.41932	0.000664	0.35834		0.00664	1.81133e-05	0.00664	0.76441	0.8295		0.00664	0.8157
0.0006656	0.41845	0.0006656	0.35745		0.00666	1.75747e-05	0.00666	0.76317	0.82834		0.00666	0.8145
0.0006672	0.41757	0.0006672	0.35657		0.00667	1.7052e-05	0.00667	0.76193	0.82717		0.00667	0.81331
0.0006688	0.4167	0.0006688	0.35569		0.00669	1.65449e-05	0.00669	0.7607	0.826		0.00669	0.81212
0.0006704	0.41583	0.0006704	0.35481		0.0067	1.60529e-05	0.0067	0.75946	0.82484		0.0067	0.81092
0.000672	0.41496	0.000672	0.35394		0.00672	1.55756e-05	0.00672	0.75823	0.82367		0.00672	0.80973
0.0006736	0.41409	0.0006736	0.35306		0.00674	1.51124e-05	0.00674	0.757	0.8225		0.00674	0.80855
0.0006752	0.41322	0.0006752	0.35219		0.00675	1.4663e-05	0.00675	0.75577	0.82134		0.00675	0.80736
0.0006768	0.41236	0.0006768	0.35132		0.00677	1.42269e-05	0.00677	0.75454	0.82017		0.00677	0.80618
0.0006784	0.4115	0.0006784	0.35045		0.00678	1.38039e-05	0.00678	0.75332	0.819		0.00678	0.80499
0.00068	0.41063	0.00068	0.34959		0.0068	1.33934e-05	0.0068	0.7521	0.81784		0.0068	0.80381
0.0006816	0.40978	0.0006816	0.34872		0.00682	1.29951e-05	0.00682	0.75088	0.81667		0.00682	0.80263
0.0006832	0.40892	0.0006832	0.34786		0.00683	1.26086e-05	0.00683	0.74966	0.8155		0.00683	0.80146
0.0006848	0.40806	0.0006848	0.347		0.00685	1.22337e-05	0.00685	0.74844	0.81434		0.00685	0.80028
0.0006864	0.40721	0.0006864	0.34615		0.00686	1.18699e-05	0.00686	0.74723	0.81317		0.00686	0.79911
0.000688	0.40636	0.000688	0.34529		0.00688	1.15169e-05	0.00688	0.74601	0.812		0.00688	0.79794
0.0006896	0.40551	0.0006896	0.34444		0.0069	1.11744e-05	0.0069	0.7448	0.81084		0.0069	0.79677
0.0006912	0.40466	0.0006912	0.34359		0.00691	1.08421e-05	0.00691	0.74359	0.80967		0.00691	0.7956
0.0006928	0.40381	0.0006928	0.34274		0.00693	1.05197e-05	0.00693	0.74239	0.8085		0.00693	0.79443
0.0006944	0.40297	0.0006944	0.34189		0.00694	1.02069e-05	0.00694	0.74118	0.80734		0.00694	0.79326
0.000696	0.40212	0.000696	0.34105		0.00696	9.90335e-06	0.00696	0.73998	0.80617		0.00696	0.7921
0.0006976	0.40128	0.0006976	0.3402		0.00698	9.60885e-06	0.00698	0.73878	0.805		0.00698	0.79094
0.0006992	0.40044	0.0006992	0.33936		0.00699	9.3231e-06	0.00699	0.73758	0.80384		0.00699	0.78978
0.0007008	0.39961	0.0007008	0.33853		0.00701	9.04586e-06	0.00701	0.73638	0.80267		0.00701	0.78862
0.0007024	0.39877	0.0007024	0.33769		0.00702	8.77686e-06	0.00702	0.73519	0.8015		0.00702	0.78746
0.000704	0.39794	0.000704	0.33686		0.00704	8.51585e-06	0.00704	0.73399	0.80034		0.00704	0.78631
0.0007056	0.3971	0.0007056	0.33602		0.00706	8.26261e-06	0.00706	0.7328	0.79917		0.00706	0.78515
0.0007072	0.39627	0.0007072	0.33519		0.00707	8.0169e-06	0.00707	0.73161	0.798		0.00707	0.784
0.0007088	0.39544	0.0007088	0.33437		0.00709	7.7785e-06	0.00709	0.73042	0.79684		0.00709	0.78285
0.0007104	0.39462	0.0007104	0.33354		0.0071	7.54719e-06	0.0071	0.72924	0.79567		0.0071	0.7817
0.000712	0.39379	0.000712	0.33272		0.00712	7.32275e-06	0.00712	0.72806	0.7945		0.00712	0.78056
0.0007136	0.39297	0.0007136	0.33189		0.00714	7.10499e-06	0.00714	0.72687	0.79334		0.00714	0.77941
0.0007152	0.39214	0.0007152	0.33108		0.00715	6.89371e-06	0.00715	0.72569	0.79217		0.00715	0.77827
0.0007168	0.39132	0.0007168	0.33026		0.00717	6.6887e-06	0.00717	0.72452	0.791		0.00717	0.77713
0.0007184	0.39051	0.0007184	0.32944		0.00718	6.4898e-06	0.00718	0.72334	0.78984		0.00718	0.77599
0.00072	0.38969	0.00072	0.32863		0.0072	6.29681e-06	0.0072	0.72217	0.78867		0.0072	0.77485
0.0007216	0.38887	0.0007216	0.32782		0.00722	6.10956e-06	0.00722	0.72099	0.7875		0.00722	0.77371
0.0007232	0.38806	0.0007232	0.32701		0.00723	5.92787e-06	0.00723	0.71982	0.78634		0.00723	0.77258
0.0007248	0.38725	0.0007248	0.3262		0.00725	5.75159e-06	0.00725	0.71866	0.78517		0.00725	0.77145
0.0007264	0.38644	0.0007264	0.32539		0.00726	5.58055e-06	0.00726	0.71749	0.784		0.00726	0.77031
0.000728	0.38563	0.000728	0.32459		0.00728	5.4146e-06	0.00728	0.71633	0.78284		0.00728	0.76918
0.0007296	0.38482	0.0007296	0.32379		0.0073	5.25359e-06	0.0073	0.71516	0.78167		0.0073	0.76806
0.0007312	0.38402	0.0007312	0.32299		0.00731	5.09736e-06	0.00731	0.714	0.7805		0.00731	0.76693
0.0007328	0.38321	0.0007328	0.32219		0.00733	4.94577e-06	0.00733	0.71284	0.77934		0.00733	0.7658
0.0007344	0.38241	0.0007344	0.32139		0.00734	4.7987e-06	0.00734	0.71169	0.77817		0.00734	0.76468
0.000736	0.38161	0.000736	0.3206		0.00736	4.656e-06	0.00736	0.71053	0.777		0.00736	0.76356
0.0007376	0.38081	0.0007376	0.31981		0.00738	4.51754e-06	0.00738	0.70938	0.77584		0.00738	0.76244
0.0007392	0.38002	0.0007392	0.31902		0.00739	4.3832e-06	0.00739	0.70823	0.77467		0.00739	0.76132
0.0007408	0.37922	0.0007408	0.31823		0.00741	4.25285e-06	0.00741	0.70708	0.77351		0.00741	0.7602
0.0007424	0.37843	0.0007424	0.31745		0.00742	4.12638e-06	0.00742	0.70593	0.77234		0.00742	0.75909
0.000744	0.37764	0.000744	0.31666		0.00744	4.00367e-06	0.00744	0.70478	0.77117		0.00744	0.75798
0.0007456	0.37685	0.0007456	0.31588		0.00746	3.88462e-06	0.00746	0.70364	0.77001		0.00746	0.75686
0.0007472	0.37606	0.0007472	0.3151		0.00747	3.7691e-06	0.00747	0.7025	0.76884		0.00747	0.75575
0.0007488	0.37527	0.0007488	0.31432		0.00749	3.65701e-06	0.00749	0.70136	0.76767		0.00749	0.75465
0.0007504	0.37449	0.0007504	0.31354		0.0075	3.54826e-06	0.0075	0.70022	0.76651		0.0075	0.75354
0.000752	0.3737	0.000752	0.31277		0.00752	3.44275e-06	0.00752	0.69908	0.76534		0.00752	0.75243
0.0007536	0.37292	0.0007536	0.312		0.00754	3.34037e-06	0.00754	0.69795	0.76417		0.00754	0.75133
0.0007552	0.37214	0.0007552	0.31123		0.00755	3.24103e-06	0.00755	0.69681	0.76301		0.00755	0.75023
0.0007568	0.37136	0.0007568	0.31046		0.00757	3.14465e-06	0.00757	0.69568	0.76184		0.00757	0.74913
0.0007584	0.37059	0.0007584	0.30969		0.00758	3.05114e-06	0.00758	0.69455	0.76067		0.00758	0.74803
0.00076	0.36981	0.00076	0.30893		0.0076	2.9604e-06	0.0076	0.69343	0.75951		0.0076	0.74693
0.0007616	0.36904	0.0007616	0.30816		0.00762	2.87237e-06	0.00762	0.6923	0.75834		0.00762	0.74584
0.0007632	0.36826	0.0007632	0.3074		0.00763	2.78695e-06	0.00763	0.69118	0.75717		0.00763	0.74474
0.0007648	0.36749	0.0007648	0.30664		0.00765	2.70407e-06	0.00765	0.69006	0.75601		0.00765	0.74365
0.0007664	0.36673	0.0007664	0.30589		0.00766	2.62366e-06	0.00766	0.68894	0.75484		0.00766	0.74256
0.000768	0.36596	0.000768	0.30513		0.00768	2.54564e-06	0.00768	0.68782	0.75367		0.00768	0.74147
0.0007696	0.36519	0.0007696	0.30438		0.0077	2.46994e-06	0.0077	0.6867	0.75251		0.0077	0.74038
0.0007712	0.36443	0.0007712	0.30362		0.00771	2.39649e-06	0.00771	0.68559	0.75134		0.00771	0.7393
0.0007728	0.36367	0.0007728	0.30287		0.00773	2.32522e-06	0.00773	0.68447	0.75017		0.00773	0.73821
0.0007744	0.36291	0.0007744	0.30213		0.00774	2.25608e-06	0.00774	0.68336	0.74901		0.00774	0.73713
0.000776	0.36215	0.000776	0.30138		0.00776	2.18899e-06	0.00776	0.68225	0.74784		0.00776	0.73605
0.0007776	0.36139	0.0007776	0.30064		0.00778	2.12389e-06	0.00778	0.68115	0.74667		0.00778	0.73497
0.0007792	0.36063	0.0007792	0.29989		0.00779	2.06073e-06	0.00779	0.68004	0.74551		0.00779	0.73389
0.0007808	0.35988	0.0007808	0.29915		0.00781	1.99945e-06	0.00781	0.67894	0.74434		0.00781	0.73281
0.0007824	0.35913	0.0007824	0.29841		0.00782	1.93999e-06	0.00782	0.67784	0.74317		0.00782	0.73174
0.000784	0.35837	0.000784	0.29768		0.00784	1.8823e-06	0.00784	0.67674	0.74201		0.00784	0.73066
0.0007856	0.35762	0.0007856	0.29694		0.00786	1.82633e-06	0.00786	0.67564	0.74084		0.00786	0.72959
0.0007872	0.35688	0.0007872	0.29621		0.00787	1.77202e-06	0.00787	0.67454	0.73967		0.00787	0.72852
0.0007888	0.35613	0.0007888	0.29548		0.00789	1.71932e-06	0.00789	0.67345	0.73851		0.00789	0.72745
0.0007904	0.35538	0.0007904	0.29475		0.0079	1.66819e-06	0.0079	0.67235	0.73734		0.0079	0.72639
0.000792	0.35464	0.000792	0.29402		0.00792	1.61858e-06	0.00792	0.67126	0.73617		0.00792	0.72532
0.0007936	0.3539	0.0007936	0.29329		0.00794	1.57045e-06	0.00794	0.67017	0.73501		0.00794	0.72426
0.0007952	0.35316	0.0007952	0.29257		0.00795	1.52375e-06	0.00795	0.66908	0.73384		0.00795	0.7232
0.0007968	0.35242	0.0007968	0.29185		0.00797	1.47844e-06	0.00797	0.668	0.73267		0.00797	0.72213
0.0007984	0.35168	0.0007984	0.29112		0.00798	1.43447e-06	0.00798	0.66691	0.73151		0.00798	0.72108
0.0008	0.35095	0.0008	0.29041		0.008	1.39182e-06	0.008	0.66583	0.73034		0.008	0.72002
0.0008016	0.35021	0.0008016	0.28969		0.00802	1.35043e-06	0.00802	0.66475	0.72917		0.00802	0.71896
0.0008032	0.34948	0.0008032	0.28897		0.00803	1.31027e-06	0.00803	0.66367	0.72801		0.00803	0.71791
0.0008048	0.34875	0.0008048	0.28826		0.00805	1.2713e-06	0.00805	0.6626	0.72684		0.00805	0.71685
0.0008064	0.34802	0.0008064	0.28755		0.00806	1.2335e-06	0.00806	0.66152	0.72567		0.00806	0.7158
0.000808	0.34729	0.000808	0.28684		0.00808	1.19682e-06	0.00808	0.66045	0.72451		0.00808	0.71475
0.0008096	0.34656	0.0008096	0.28613		0.0081	1.16123e-06	0.0081	0.65937	0.72334		0.0081	0.7137
0.0008112	0.34584	0.0008112	0.28542		0.00811	1.12669e-06	0.00811	0.6583	0.72217		0.00811	0.71266
0.0008128	0.34512	0.0008128	0.28472		0.00813	1.09319e-06	0.00813	0.65724	0.72101		0.00813	0.71161
0.0008144	0.34439	0.0008144	0.28401		0.00814	1.06068e-06	0.00814	0.65617	0.71984		0.00814	0.71057
0.000816	0.34367	0.000816	0.28331		0.00816	1.02914e-06	0.00816	0.6551	0.71867		0.00816	0.70953
0.0008176	0.34295	0.0008176	0.28261		0.00818	9.98534e-07	0.00818	0.65404	0.71751		0.00818	0.70848
0.0008192	0.34224	0.0008192	0.28191		0.00819	9.6884e-07	0.00819	0.65298	0.71634		0.00819	0.70745
0.0008208	0.34152	0.0008208	0.28122		0.00821	9.4003e-07	0.00821	0.65192	0.71518		0.00821	0.70641
0.0008224	0.34081	0.0008224	0.28052		0.00822	9.12075e-07	0.00822	0.65086	0.71401		0.00822	0.70537
0.000824	0.34009	0.000824	0.27983		0.00824	8.84952e-07	0.00824	0.6498	0.71284		0.00824	0.70434
0.0008256	0.33938	0.0008256	0.27914		0.00826	8.58636e-07	0.00826	0.64875	0.71168		0.00826	0.7033
0.0008272	0.33867	0.0008272	0.27845		0.00827	8.33102e-07	0.00827	0.6477	0.71051		0.00827	0.70227
0.0008288	0.33796	0.0008288	0.27776		0.00829	8.08328e-07	0.00829	0.64665	0.70934		0.00829	0.70124
0.0008304	0.33726	0.0008304	0.27708		0.0083	7.8429e-07	0.0083	0.6456	0.70818		0.0083	0.70021
0.000832	0.33655	0.000832	0.27639		0.00832	7.60967e-07	0.00832	0.64455	0.70701		0.00832	0.69919
0.0008336	0.33585	0.0008336	0.27571		0.00834	7.38338e-07	0.00834	0.6435	0.70584		0.00834	0.69816
0.0008352	0.33514	0.0008352	0.27503		0.00835	7.16382e-07	0.00835	0.64246	0.70468		0.00835	0.69714
0.0008368	0.33444	0.0008368	0.27435		0.00837	6.95078e-07	0.00837	0.64142	0.70351		0.00837	0.69611
0.0008384	0.33374	0.0008384	0.27367		0.00838	6.74408e-07	0.00838	0.64037	0.70234		0.00838	0.69509
0.00084	0.33305	0.00084	0.273		0.0084	6.54353e-07	0.0084	0.63933	0.70118		0.0084	0.69407
0.0008416	0.33235	0.0008416	0.27232		0.00842	6.34894e-07	0.00842	0.6383	0.70001		0.00842	0.69306
0.0008432	0.33165	0.0008432	0.27165		0.00843	6.16014e-07	0.00843	0.63726	0.69884		0.00843	0.69204
0.0008448	0.33096	0.0008448	0.27098		0.00845	5.97695e-07	0.00845	0.63623	0.69768		0.00845	0.69102
0.0008464	0.33027	0.0008464	0.27031		0.00846	5.79921e-07	0.00846	0.63519	0.69651		0.00846	0.69001
0.000848	0.32958	0.000848	0.26964		0.00848	5.62676e-07	0.00848	0.63416	0.69534		0.00848	0.689
0.0008496	0.32889	0.0008496	0.26897		0.0085	5.45943e-07	0.0085	0.63313	0.69418		0.0085	0.68799
0.0008512	0.3282	0.0008512	0.26831		0.00851	5.29708e-07	0.00851	0.63211	0.69301		0.00851	0.68698
0.0008528	0.32751	0.0008528	0.26765		0.00853	5.13956e-07	0.00853	0.63108	0.69184		0.00853	0.68597
0.0008544	0.32683	0.0008544	0.26699		0.00854	4.98672e-07	0.00854	0.63006	0.69068		0.00854	0.68496
0.000856	0.32614	0.000856	0.26633		0.00856	4.83843e-07	0.00856	0.62903	0.68951		0.00856	0.68396
0.0008576	0.32546	0.0008576	0.26567		0.00858	4.69455e-07	0.00858	0.62801	0.68834		0.00858	0.68296
0.0008592	0.32478	0.0008592	0.26501		0.00859	4.55494e-07	0.00859	0.62699	0.68718		0.00859	0.68195
0.0008608	0.3241	0.0008608	0.26436		0.00861	4.41949e-07	0.00861	0.62598	0.68601		0.00861	0.68095
0.0008624	0.32342	0.0008624	0.26371		0.00862	4.28806e-07	0.00862	0.62496	0.68484		0.00862	0.67996
0.000864	0.32275	0.000864	0.26305		0.00864	4.16055e-07	0.00864	0.62395	0.68368		0.00864	0.67896
0.0008656	0.32207	0.0008656	0.2624		0.00866	4.03682e-07	0.00866	0.62293	0.68251		0.00866	0.67796
0.0008672	0.3214	0.0008672	0.26176		0.00867	3.91678e-07	0.00867	0.62192	0.68134		0.00867	0.67697
0.0008688	0.32072	0.0008688	0.26111		0.00869	3.8003e-07	0.00869	0.62091	0.68018		0.00869	0.67598
0.0008704	0.32005	0.0008704	0.26047		0.0087	3.68729e-07	0.0087	0.6199	0.67901		0.0087	0.67498
0.000872	0.31938	0.000872	0.25982		0.00872	3.57764e-07	0.00872	0.6189	0.67784		0.00872	0.67399
0.0008736	0.31872	0.0008736	0.25918		0.00874	3.47125e-07	0.00874	0.61789	0.67668		0.00874	0.673
0.0008752	0.31805	0.0008752	0.25854		0.00875	3.36802e-07	0.00875	0.61689	0.67551		0.00875	0.67202
0.0008768	0.31738	0.0008768	0.2579		0.00877	3.26787e-07	0.00877	0.61589	0.67434		0.00877	0.67103
0.0008784	0.31672	0.0008784	0.25726		0.00878	3.17069e-07	0.00878	0.61489	0.67318		0.00878	0.67005
0.00088	0.31606	0.00088	0.25663		0.0088	3.0764e-07	0.0088	0.61389	0.67201		0.0088	0.66906
0.0008816	0.3154	0.0008816	0.256		0.00882	2.98492e-07	0.00882	0.6129	0.67084		0.00882	0.66808
0.0008832	0.31474	0.0008832	0.25536		0.00883	2.89615e-07	0.00883	0.6119	0.66968		0.00883	0.6671
0.0008848	0.31408	0.0008848	0.25473		0.00885	2.81003e-07	0.00885	0.61091	0.66851		0.00885	0.66612
0.0008864	0.31342	0.0008864	0.2541		0.00886	2.72646e-07	0.00886	0.60992	0.66734		0.00886	0.66515
0.000888	0.31276	0.000888	0.25348		0.00888	2.64538e-07	0.00888	0.60893	0.66618		0.00888	0.66417
0.0008896	0.31211	0.0008896	0.25285		0.0089	2.56672e-07	0.0089	0.60794	0.66501		0.0089	0.6632
0.0008912	0.31146	0.0008912	0.25222		0.00891	2.49039e-07	0.00891	0.60695	0.66384		0.00891	0.66223
0.0008928	0.31081	0.0008928	0.2516		0.00893	2.41633e-07	0.00893	0.60597	0.66268		0.00893	0.66125
0.0008944	0.31016	0.0008944	0.25098		0.00894	2.34448e-07	0.00894	0.60498	0.66151		0.00894	0.66028
0.000896	0.30951	0.000896	0.25036		0.00896	2.27476e-07	0.00896	0.604	0.66034		0.00896	0.65932
0.0008976	0.30886	0.0008976	0.24974		0.00898	2.20711e-07	0.00898	0.60302	0.65918		0.00898	0.65835
0.0008992	0.30821	0.0008992	0.24913		0.00899	2.14148e-07	0.00899	0.60204	0.65801		0.00899	0.65738
0.0009008	0.30757	0.0009008	0.24851		0.00901	2.07779e-07	0.00901	0.60106	0.65685		0.00901	0.65642
0.0009024	0.30693	0.0009024	0.2479		0.00902	2.01601e-07	0.00902	0.60009	0.65568		0.00902	0.65546
0.000904	0.30628	0.000904	0.24728		0.00904	1.95606e-07	0.00904	0.59912	0.65451		0.00904	0.65449
0.0009056	0.30564	0.0009056	0.24667		0.00906	1.89789e-07	0.00906	0.59814	0.65335		0.00906	0.65353
0.0009072	0.305	0.0009072	0.24606		0.00907	1.84145e-07	0.00907	0.59717	0.65218		0.00907	0.65258
0.0009088	0.30436	0.0009088	0.24546		0.00909	1.78669e-07	0.00909	0.5962	0.65101		0.00909	0.65162
0.0009104	0.30373	0.0009104	0.24485		0.0091	1.73356e-07	0.0091	0.59524	0.64985		0.0091	0.65066
0.000912	0.30309	0.000912	0.24425		0.00912	1.682e-07	0.00912	0.59427	0.64868		0.00912	0.64971
0.0009136	0.30246	0.0009136	0.24364		0.00914	1.63199e-07	0.00914	0.5933	0.64751		0.00914	0.64876
0.0009152	0.30183	0.0009152	0.24304		0.00915	1.58345e-07	0.00915	0.59234	0.64635		0.00915	0.6478
0.0009168	0.30119	0.0009168	0.24244		0.00917	1.53637e-07	0.00917	0.59138	0.64518		0.00917	0.64685
0.0009184	0.30056	0.0009184	0.24184		0.00918	1.49068e-07	0.00918	0.59042	0.64401		0.00918	0.6459
0.00092	0.29994	0.00092	0.24124		0.0092	1.44635e-07	0.0092	0.58946	0.64285		0.0092	0.64496
0.0009216	0.29931	0.0009216	0.24065		0.00922	1.40334e-07	0.00922	0.58851	0.64168		0.00922	0.64401
0.0009232	0.29868	0.0009232	0.24005		0.00923	1.36161e-07	0.00923	0.58755	0.64051		0.00923	0.64307
0.0009248	0.29806	0.0009248	0.23946		0.00925	1.32112e-07	0.00925	0.5866	0.63935		0.00925	0.64212
0.0009264	0.29743	0.0009264	0.23887		0.00926	1.28183e-07	0.00926	0.58564	0.63818		0.00926	0.64118
0.000928	0.29681	0.000928	0.23828		0.00928	1.24371e-07	0.00928	0.58469	0.63701		0.00928	0.64024
0.0009296	0.29619	0.0009296	0.23769		0.0093	1.20673e-07	0.0093	0.58374	0.63615		0.0093	0.6393
0.0009312	0.29557	0.0009312	0.2371		0.00931	1.17084e-07	0.00931	0.5828	0.63533		0.00931	0.63836
0.0009328	0.29495	0.0009328	0.23652		0.00933	1.13602e-07	0.00933	0.58185	0.6345		0.00933	0.63743
0.0009344	0.29434	0.0009344	0.23593		0.00934	1.10224e-07	0.00934	0.58091	0.63368		0.00934	0.63649
0.000936	0.29372	0.000936	0.23535		0.00936	1.06946e-07	0.00936	0.57996	0.63285		0.00936	0.63556
0.0009376	0.2931	0.0009376	0.23477		0.00938	1.03766e-07	0.00938	0.57902	0.63203		0.00938	0.63463
0.0009392	0.29249	0.0009392	0.23419		0.00939	1.0068e-07	0.00939	0.57808	0.63121		0.00939	0.6337
0.0009408	0.29188	0.0009408	0.23361		0.00941	9.76862e-08	0.00941	0.57714	0.63038		0.00941	0.63277
0.0009424	0.29127	0.0009424	0.23303		0.00942	9.47813e-08	0.00942	0.57621	0.62956		0.00942	0.63184
0.000944	0.29066	0.000944	0.23246		0.00944	9.19627e-08	0.00944	0.57527	0.62873		0.00944	0.63091
0.0009456	0.29005	0.0009456	0.23188		0.00946	8.92279e-08	0.00946	0.57434	0.62791		0.00946	0.62999
0.0009472	0.28944	0.0009472	0.23131		0.00947	8.65745e-08	0.00947	0.57341	0.62708		0.00947	0.62906
0.0009488	0.28884	0.0009488	0.23074		0.00949	8.4e-08	0.00949	0.57248	0.62626		0.00949	0.62814
0.0009504	0.28824	0.0009504	0.23017		0.0095	8.15021e-08	0.0095	0.57155	0.62543		0.0095	0.62722
0.000952	0.28763	0.000952	0.2296		0.00952	7.90784e-08	0.00952	0.57062	0.62461		0.00952	0.6263
0.0009536	0.28703	0.0009536	0.22904		0.00954	7.67268e-08	0.00954	0.56969	0.62379		0.00954	0.62538
0.0009552	0.28643	0.0009552	0.22847		0.00955	7.44451e-08	0.00955	0.56877	0.62296		0.00955	0.62446
0.0009568	0.28583	0.0009568	0.22791		0.00957	7.22313e-08	0.00957	0.56785	0.62214		0.00957	0.62355
0.0009584	0.28523	0.0009584	0.22734		0.00958	7.00833e-08	0.00958	0.56692	0.62131		0.00958	0.62263
0.00096	0.28464	0.00096	0.22678		0.0096	6.79992e-08	0.0096	0.566	0.62049		0.0096	0.62172
0.0009616	0.28404	0.0009616	0.22622		0.00962	6.59771e-08	0.00962	0.56509	0.61966		0.00962	0.62081
0.0009632	0.28345	0.0009632	0.22566		0.00963	6.40151e-08	0.00963	0.56417	0.61884		0.00963	0.6199
0.0009648	0.28285	0.0009648	0.2251		0.00965	6.21114e-08	0.00965	0.56325	0.61801		0.00965	0.61899
0.0009664	0.28226	0.0009664	0.22455		0.00966	6.02644e-08	0.00966	0.56234	0.61719		0.00966	0.61808
0.000968	0.28167	0.000968	0.22399		0.00968	5.84723e-08	0.00968	0.56143	0.61637		0.00968	0.61717
0.0009696	0.28108	0.0009696	0.22344		0.0097	5.67335e-08	0.0097	0.56051	0.61554		0.0097	0.61627
0.0009712	0.28049	0.0009712	0.22289		0.00971	5.50463e-08	0.00971	0.5596	0.61472		0.00971	0.61536
0.0009728	0.27991	0.0009728	0.22234		0.00973	5.34094e-08	0.00973	0.5587	0.61389		0.00973	0.61446
0.0009744	0.27932	0.0009744	0.22179		0.00974	5.18211e-08	0.00974	0.55779	0.61307		0.00974	0.61356
0.000976	0.27874	0.000976	0.22124		0.00976	5.02801e-08	0.00976	0.55688	0.61224		0.00976	0.61266
0.0009776	0.27815	0.0009776	0.22069		0.00978	4.87849e-08	0.00978	0.55598	0.61142		0.00978	0.61176
0.0009792	0.27757	0.0009792	0.22015		0.00979	4.73342e-08	0.00979	0.55508	0.6106		0.00979	0.61086
0.0009808	0.27699	0.0009808	0.21961		0.00981	4.59265e-08	0.00981	0.55418	0.60977		0.00981	0.60997
0.0009824	0.27641	0.0009824	0.21906		0.00982	4.45608e-08	0.00982	0.55328	0.60895		0.00982	0.60907
0.000984	0.27583	0.000984	0.21852		0.00984	4.32357e-08	0.00984	0.55238	0.60812		0.00984	0.60818
0.0009856	0.27526	0.0009856	0.21798		0.00986	4.195e-08	0.00986	0.55148	0.6073		0.00986	0.60729
0.0009872	0.27468	0.0009872	0.21744		0.00987	4.07025e-08	0.00987	0.55059	0.60647		0.00987	0.6064
0.0009888	0.27411	0.0009888	0.21691		0.00989	3.94921e-08	0.00989	0.54969	0.60565		0.00989	0.60551
0.0009904	0.27353	0.0009904	0.21637		0.0099	3.83177e-08	0.0099	0.5488	0.60482		0.0099	0.60462
0.000992	0.27296	0.000992	0.21584		0.00992	3.71782e-08	0.00992	0.54791	0.604		0.00992	0.60373
0.0009936	0.27239	0.0009936	0.2153		0.00994	3.60726e-08	0.00994	0.54702	0.60318		0.00994	0.60285
0.0009952	0.27182	0.0009952	0.21477		0.00995	3.49999e-08	0.00995	0.54613	0.60235		0.00995	0.60196
0.0009968	0.27125	0.0009968	0.21424		0.00997	3.39591e-08	0.00997	0.54525	0.60153		0.00997	0.60108
0.0009984	0.27068	0.0009984	0.21371		0.00998	3.29492e-08	0.00998	0.54436	0.6007		0.00998	0.6002
0.001	0.27012	0.001	0.21318		0.01	3.19694e-08	0.01	0.54348	0.59988		0.01	0.59932
0.001	0.26955	0.001	0.21266		0.01002	3.10187e-08	0.01002	0.5426	0.59905		0.01002	0.59844
0.001	0.26899	0.001	0.21213		0.01003	3.00963e-08	0.01003	0.54172	0.59823		0.01003	0.59756
0.001	0.26843	0.001	0.21161		0.01005	2.92013e-08	0.01005	0.54084	0.5974		0.01005	0.59668
0.00101	0.26786	0.00101	0.21109		0.01006	2.83329e-08	0.01006	0.53996	0.59658		0.01006	0.59581
0.00101	0.2673	0.00101	0.21057		0.01008	2.74904e-08	0.01008	0.53908	0.59576		0.01008	0.59493
0.00101	0.26674	0.00101	0.21005		0.0101	2.66729e-08	0.0101	0.53821	0.59493		0.0101	0.59406
0.00101	0.26619	0.00101	0.20953		0.01011	2.58797e-08	0.01011	0.53733	0.59411		0.01011	0.59319
0.00101	0.26563	0.00101	0.20901		0.01013	2.51101e-08	0.01013	0.53646	0.59328		0.01013	0.59232
0.00101	0.26507	0.00101	0.20849		0.01014	2.43634e-08	0.01014	0.53559	0.59246		0.01014	0.59145
0.00102	0.26452	0.00102	0.20798		0.01016	2.36389e-08	0.01016	0.53472	0.59163		0.01016	0.59058
0.00102	0.26397	0.00102	0.20746		0.01018	2.29359e-08	0.01018	0.53385	0.59081		0.01018	0.58972
0.00102	0.26341	0.00102	0.20695		0.01019	2.22539e-08	0.01019	0.53299	0.58998		0.01019	0.58885
0.00102	0.26286	0.00102	0.20644		0.01021	2.15921e-08	0.01021	0.53212	0.58916		0.01021	0.58799
0.00102	0.26231	0.00102	0.20593		0.01022	2.095e-08	0.01022	0.53126	0.58834		0.01022	0.58713
0.00102	0.26176	0.00102	0.20542		0.01024	2.0327e-08	0.01024	0.5304	0.58751		0.01024	0.58626
0.00103	0.26122	0.00103	0.20491		0.01026	1.97225e-08	0.01026	0.52954	0.58669		0.01026	0.5854
0.00103	0.26067	0.00103	0.20441		0.01027	1.9136e-08	0.01027	0.52868	0.58586		0.01027	0.58455
0.00103	0.26012	0.00103	0.2039		0.01029	1.85669e-08	0.01029	0.52782	0.58504		0.01029	0.58369
0.00103	0.25958	0.00103	0.2034		0.0103	1.80148e-08	0.0103	0.52696	0.58421		0.0103	0.58283
0.00103	0.25904	0.00103	0.2029		0.01032	1.74791e-08	0.01032	0.52611	0.58339		0.01032	0.58198
0.00103	0.25849	0.00103	0.2024		0.01034	1.69593e-08	0.01034	0.52525	0.58256		0.01034	0.58112
0.00104	0.25795	0.00104	0.2019		0.01035	1.6455e-08	0.01035	0.5244	0.58174		0.01035	0.58027
0.00104	0.25741	0.00104	0.2014		0.01037	1.59657e-08	0.01037	0.52355	0.58092		0.01037	0.57942
0.00104	0.25688	0.00104	0.2009		0.01038	1.54909e-08	0.01038	0.5227	0.58009		0.01038	0.57857
0.00104	0.25634	0.00104	0.2004		0.0104	1.50302e-08	0.0104	0.52185	0.57927		0.0104	0.57772
0.00104	0.2558	0.00104	0.19991		0.01042	1.45832e-08	0.01042	0.521	0.57844		0.01042	0.57687
0.00104	0.25527	0.00104	0.19942		0.01043	1.41496e-08	0.01043	0.52016	0.57762		0.01043	0.57603
0.00104	0.25473	0.00104	0.19892		0.01045	1.37288e-08	0.01045	0.51931	0.57679		0.01045	0.57518
0.00105	0.2542	0.00105	0.19843		0.01046	1.33205e-08	0.01046	0.51847	0.57597		0.01046	0.57434
0.00105	0.25367	0.00105	0.19794		0.01048	1.29244e-08	0.01048	0.51763	0.57514		0.01048	0.5735
0.00105	0.25314	0.00105	0.19745		0.0105	1.25401e-08	0.0105	0.51679	0.57432		0.0105	0.57266
0.00105	0.25261	0.00105	0.19696		0.01051	1.21672e-08	0.01051	0.51595	0.5735		0.01051	0.57182
0.00105	0.25208	0.00105	0.19648		0.01053	1.18053e-08	0.01053	0.51511	0.57267		0.01053	0.57098
0.00105	0.25155	0.00105	0.19599		0.01054	1.14543e-08	0.01054	0.51428	0.57185		0.01054	0.57014
0.00106	0.25103	0.00106	0.19551		0.01056	1.11137e-08	0.01056	0.51344	0.57102		0.01056	0.5693
0.00106	0.2505	0.00106	0.19503		0.01058	1.07832e-08	0.01058	0.51261	0.5702		0.01058	0.56847
0.00106	0.24998	0.00106	0.19454		0.01059	1.04625e-08	0.01059	0.51178	0.56937		0.01059	0.56763
0.00106	0.24945	0.00106	0.19406		0.01061	1.01514e-08	0.01061	0.51095	0.56855		0.01061	0.5668
0.00106	0.24893	0.00106	0.19358		0.01062	9.8495e-09	0.01062	0.51012	0.56773		0.01062	0.56597
0.00106	0.24841	0.00106	0.19311		0.01064	9.5566e-09	0.01064	0.50929	0.5669		0.01064	0.56514
0.00107	0.24789	0.00107	0.19263		0.01066	9.27241e-09	0.01066	0.50846	0.56608		0.01066	0.56431
0.00107	0.24737	0.00107	0.19215		0.01067	8.99667e-09	0.01067	0.50764	0.56525		0.01067	0.56348
0.00107	0.24686	0.00107	0.19168		0.01069	8.72913e-09	0.01069	0.50681	0.56443		0.01069	0.56266
0.00107	0.24634	0.00107	0.19121		0.0107	8.46955e-09	0.0107	0.50599	0.5636		0.0107	0.56183
0.00107	0.24582	0.00107	0.19073		0.01072	8.21769e-09	0.01072	0.50517	0.56278		0.01072	0.56101
0.00107	0.24531	0.00107	0.19026		0.01074	7.97331e-09	0.01074	0.50435	0.56195		0.01074	0.56018
0.00108	0.2448	0.00108	0.18979		0.01075	7.73621e-09	0.01075	0.50353	0.56113		0.01075	0.55936
0.00108	0.24428	0.00108	0.18932		0.01077	7.50615e-09	0.01077	0.50271	0.56031		0.01077	0.55854
0.00108	0.24377	0.00108	0.18886		0.01078	7.28293e-09	0.01078	0.5019	0.55948		0.01078	0.55772
0.00108	0.24326	0.00108	0.18839		0.0108	7.06636e-09	0.0108	0.50108	0.55866		0.0108	0.55691
0.00108	0.24275	0.00108	0.18792		0.01082	6.85622e-09	0.01082	0.50027	0.55783		0.01082	0.55609
0.00108	0.24225	0.00108	0.18746		0.01083	6.65233e-09	0.01083	0.49946	0.55701		0.01083	0.55527
0.00108	0.24174	0.00108	0.187		0.01085	6.45451e-09	0.01085	0.49865	0.55618		0.01085	0.55446
0.00109	0.24123	0.00109	0.18654		0.01086	6.26257e-09	0.01086	0.49784	0.55536		0.01086	0.55364
0.00109	0.24073	0.00109	0.18607		0.01088	6.07634e-09	0.01088	0.49703	0.55453		0.01088	0.55283
0.00109	0.24023	0.00109	0.18562		0.0109	5.89564e-09	0.0109	0.49622	0.55371		0.0109	0.55202
0.00109	0.23972	0.00109	0.18516		0.01091	5.72032e-09	0.01091	0.49542	0.55289		0.01091	0.55121
0.00109	0.23922	0.00109	0.1847		0.01093	5.55021e-09	0.01093	0.49461	0.55206		0.01093	0.5504
0.00109	0.23872	0.00109	0.18424		0.01094	5.38516e-09	0.01094	0.49381	0.55124		0.01094	0.5496
0.0011	0.23822	0.0011	0.18379		0.01096	5.22502e-09	0.01096	0.49301	0.55041		0.01096	0.54879
0.0011	0.23772	0.0011	0.18333		0.01098	5.06964e-09	0.01098	0.49221	0.54959		0.01098	0.54798
0.0011	0.23723	0.0011	0.18288		0.01099	4.91888e-09	0.01099	0.49141	0.54876		0.01099	0.54718
0.0011	0.23673	0.0011	0.18243		0.01101	4.77261e-09	0.01101	0.49061	0.54794		0.01101	0.54638
0.0011	0.23623	0.0011	0.18198		0.01102	4.63068e-09	0.01102	0.48982	0.54711		0.01102	0.54558
0.0011	0.23574	0.0011	0.18153		0.01104	4.49298e-09	0.01104	0.48902	0.54629		0.01104	0.54478
0.00111	0.23525	0.00111	0.18108		0.01106	4.35936e-09	0.01106	0.48823	0.54547		0.01106	0.54398
0.00111	0.23475	0.00111	0.18063		0.01107	4.22973e-09	0.01107	0.48744	0.54464		0.01107	0.54318
0.00111	0.23426	0.00111	0.18019		0.01109	4.10395e-09	0.01109	0.48665	0.54382		0.01109	0.54238
0.00111	0.23377	0.00111	0.17974		0.0111	3.98191e-09	0.0111	0.48586	0.54299		0.0111	0.54159
0.00111	0.23328	0.00111	0.1793		0.01112	3.86349e-09	0.01112	0.48507	0.54217		0.01112	0.54079
0.00111	0.2328	0.00111	0.17886		0.01114	3.7486e-09	0.01114	0.48428	0.54134		0.01114	0.54
0.00112	0.23231	0.00112	0.17841		0.01115	3.63713e-09	0.01115	0.48349	0.54052		0.01115	0.53921
0.00112	0.23182	0.00112	0.17797		0.01117	3.52897e-09	0.01117	0.48271	0.53969		0.01117	0.53842
0.00112	0.23134	0.00112	0.17753		0.01118	3.42403e-09	0.01118	0.48193	0.53887		0.01118	0.53763
0.00112	0.23085	0.00112	0.1771		0.0112	3.3222e-09	0.0112	0.48114	0.53805		0.0112	0.53684
0.00112	0.23037	0.00112	0.17666		0.01122	3.22341e-09	0.01122	0.48036	0.53722		0.01122	0.53605
0.00112	0.22989	0.00112	0.17622		0.01123	3.12755e-09	0.01123	0.47958	0.5364		0.01123	0.53526
0.00112	0.22941	0.00112	0.17579		0.01125	3.03455e-09	0.01125	0.4788	0.53557		0.01125	0.53448
0.00113	0.22893	0.00113	0.17535		0.01126	2.94431e-09	0.01126	0.47803	0.53475		0.01126	0.5337
0.00113	0.22845	0.00113	0.17492		0.01128	2.85675e-09	0.01128	0.47725	0.53392		0.01128	0.53291
0.00113	0.22797	0.00113	0.17449		0.0113	2.7718e-09	0.0113	0.47648	0.5331		0.0113	0.53213
0.00113	0.22749	0.00113	0.17406		0.01131	2.68937e-09	0.01131	0.4757	0.53227		0.01131	0.53135
0.00113	0.22702	0.00113	0.17363		0.01133	2.6094e-09	0.01133	0.47493	0.53145		0.01133	0.53057
0.00113	0.22654	0.00113	0.1732		0.01134	2.5318e-09	0.01134	0.47416	0.53063		0.01134	0.52979
0.00114	0.22607	0.00114	0.17277		0.01136	2.45651e-09	0.01136	0.47339	0.5298		0.01136	0.52902
0.00114	0.2256	0.00114	0.17234		0.01138	2.38346e-09	0.01138	0.47262	0.52898		0.01138	0.52824
0.00114	0.22512	0.00114	0.17192		0.01139	2.31258e-09	0.01139	0.47186	0.52815		0.01139	0.52747
0.00114	0.22465	0.00114	0.17149		0.01141	2.24381e-09	0.01141	0.47109	0.52733		0.01141	0.52669
0.00114	0.22418	0.00114	0.17107		0.01142	2.17708e-09	0.01142	0.47032	0.5265		0.01142	0.52592
0.00114	0.22372	0.00114	0.17065		0.01144	2.11234e-09	0.01144	0.46956	0.52568		0.01144	0.52515
0.00115	0.22325	0.00115	0.17023		0.01146	2.04953e-09	0.01146	0.4688	0.52486		0.01146	0.52438
0.00115	0.22278	0.00115	0.1698		0.01147	1.98858e-09	0.01147	0.46804	0.52403		0.01147	0.52361
0.00115	0.22231	0.00115	0.16939		0.01149	1.92944e-09	0.01149	0.46728	0.52321		0.01149	0.52284
0.00115	0.22185	0.00115	0.16897		0.0115	1.87207e-09	0.0115	0.46652	0.52238		0.0115	0.52207
0.00115	0.22138	0.00115	0.16855		0.01152	1.8164e-09	0.01152	0.46576	0.52156		0.01152	0.52131
0.00115	0.22092	0.00115	0.16813		0.01154	1.76238e-09	0.01154	0.46501	0.52083		0.01154	0.52054
0.00116	0.22046	0.00116	0.16772		0.01155	1.70997e-09	0.01155	0.46425	0.52019		0.01155	0.51978
0.00116	0.22	0.00116	0.1673		0.01157	1.65912e-09	0.01157	0.4635	0.51956		0.01157	0.51902
0.00116	0.21954	0.00116	0.16689		0.01158	1.60978e-09	0.01158	0.46275	0.51892		0.01158	0.51826
0.00116	0.21908	0.00116	0.16648		0.0116	1.56191e-09	0.0116	0.462	0.51828		0.0116	0.5175
0.00116	0.21862	0.00116	0.16607		0.01162	1.51547e-09	0.01162	0.46125	0.51764		0.01162	0.51674
0.00116	0.21816	0.00116	0.16566		0.01163	1.4704e-09	0.01163	0.4605	0.51701		0.01163	0.51598
0.00116	0.21771	0.00116	0.16525		0.01165	1.42667e-09	0.01165	0.45975	0.51637		0.01165	0.51522
0.00117	0.21725	0.00117	0.16484		0.01166	1.38425e-09	0.01166	0.459	0.51573		0.01166	0.51447
0.00117	0.2168	0.00117	0.16443		0.01168	1.34308e-09	0.01168	0.45826	0.51509		0.01168	0.51371
0.00117	0.21634	0.00117	0.16403		0.0117	1.30314e-09	0.0117	0.45751	0.51446		0.0117	0.51296
0.00117	0.21589	0.00117	0.16362		0.01171	1.26439e-09	0.01171	0.45677	0.51382		0.01171	0.51221
0.00117	0.21544	0.00117	0.16322		0.01173	1.22679e-09	0.01173	0.45603	0.51318		0.01173	0.51145
0.00117	0.21499	0.00117	0.16281		0.01174	1.19031e-09	0.01174	0.45529	0.51254		0.01174	0.5107
0.00118	0.21454	0.00118	0.16241		0.01176	1.15491e-09	0.01176	0.45455	0.51191		0.01176	0.50995
0.00118	0.21409	0.00118	0.16201		0.01178	1.12057e-09	0.01178	0.45381	0.51127		0.01178	0.50921
0.00118	0.21364	0.00118	0.16161		0.01179	1.08725e-09	0.01179	0.45308	0.51063		0.01179	0.50846
0.00118	0.21319	0.00118	0.16121		0.01181	1.05491e-09	0.01181	0.45234	0.50999		0.01181	0.50771
0.00118	0.21275	0.00118	0.16081		0.01182	1.02354e-09	0.01182	0.45161	0.50936		0.01182	0.50697
0.00118	0.2123	0.00118	0.16042		0.01184	9.93105e-10	0.01184	0.45087	0.50872		0.01184	0.50623
0.00119	0.21186	0.00119	0.16002		0.01186	9.63572e-10	0.01186	0.45014	0.50808		0.01186	0.50548
0.00119	0.21142	0.00119	0.15962		0.01187	9.34918e-10	0.01187	0.44941	0.50744		0.01187	0.50474
0.00119	0.21097	0.00119	0.15923		0.01189	9.07116e-10	0.01189	0.44868	0.5068		0.01189	0.504
0.00119	0.21053	0.00119	0.15884		0.0119	8.80141e-10	0.0119	0.44795	0.50617		0.0119	0.50326
0.00119	0.21009	0.00119	0.15844		0.01192	8.53967e-10	0.01192	0.44723	0.50553		0.01192	0.50252
0.00119	0.20965	0.00119	0.15805		0.01194	8.28572e-10	0.01194	0.4465	0.50489		0.01194	0.50179
0.0012	0.20921	0.0012	0.15766		0.01195	8.03933e-10	0.01195	0.44578	0.50425		0.01195	0.50105
0.0012	0.20878	0.0012	0.15727		0.01197	7.80026e-10	0.01197	0.44505	0.50362		0.01197	0.50032
0.0012	0.20834	0.0012	0.15689		0.01198	7.5683e-10	0.01198	0.44433	0.50298		0.01198	0.49958
0.0012	0.2079	0.0012	0.1565		0.012	7.34323e-10	0.012	0.44361	0.50234		0.012	0.49885
0.0012	0.20747	0.0012	0.15611		0.01202	7.12486e-10	0.01202	0.44289	0.5017		0.01202	0.49812
0.0012	0.20703	0.0012	0.15573		0.01203	6.91299e-10	0.01203	0.44217	0.50107		0.01203	0.49739
0.0012	0.2066	0.0012	0.15534		0.01205	6.70741e-10	0.01205	0.44145	0.50043		0.01205	0.49666
0.00121	0.20617	0.00121	0.15496		0.01206	6.50795e-10	0.01206	0.44074	0.49979		0.01206	0.49593
0.00121	0.20574	0.00121	0.15457		0.01208	6.31442e-10	0.01208	0.44002	0.49915		0.01208	0.4952
0.00121	0.20531	0.00121	0.15419		0.0121	6.12665e-10	0.0121	0.43931	0.49852		0.0121	0.49447
0.00121	0.20488	0.00121	0.15381		0.01211	5.94445e-10	0.01211	0.43859	0.49788		0.01211	0.49375
0.00121	0.20445	0.00121	0.15343		0.01213	5.76768e-10	0.01213	0.43788	0.49724		0.01213	0.49302
0.00121	0.20402	0.00121	0.15305		0.01214	5.59616e-10	0.01214	0.43717	0.4966		0.01214	0.4923
0.00122	0.20359	0.00122	0.15268		0.01216	5.42975e-10	0.01216	0.43646	0.49596		0.01216	0.49158
0.00122	0.20317	0.00122	0.1523		0.01218	5.26828e-10	0.01218	0.43575	0.49533		0.01218	0.49086
0.00122	0.20274	0.00122	0.15192		0.01219	5.11161e-10	0.01219	0.43505	0.49469		0.01219	0.49014
0.00122	0.20232	0.00122	0.15155		0.01221	4.95961e-10	0.01221	0.43434	0.49405		0.01221	0.48942
0.00122	0.2019	0.00122	0.15117		0.01222	4.81212e-10	0.01222	0.43364	0.49341		0.01222	0.4887
0.00122	0.20147	0.00122	0.1508		0.01224	4.66902e-10	0.01224	0.43293	0.49278		0.01224	0.48798
0.00123	0.20105	0.00123	0.15043		0.01226	4.53017e-10	0.01226	0.43223	0.49214		0.01226	0.48727
0.00123	0.20063	0.00123	0.15005		0.01227	4.39546e-10	0.01227	0.43153	0.4915		0.01227	0.48655
0.00123	0.20021	0.00123	0.14968		0.01229	4.26475e-10	0.01229	0.43083	0.49086		0.01229	0.48584
0.00123	0.19979	0.00123	0.14931		0.0123	4.13793e-10	0.0123	0.43013	0.49023		0.0123	0.48513
0.00123	0.19938	0.00123	0.14895		0.01232	4.01487e-10	0.01232	0.42943	0.48959		0.01232	0.48442
0.00123	0.19896	0.00123	0.14858		0.01234	3.89548e-10	0.01234	0.42873	0.48895		0.01234	0.48371
0.00124	0.19854	0.00124	0.14821		0.01235	3.77964e-10	0.01235	0.42804	0.48831		0.01235	0.483
0.00124	0.19813	0.00124	0.14784		0.01237	3.66724e-10	0.01237	0.42734	0.48768		0.01237	0.48229
0.00124	0.19771	0.00124	0.14748		0.01238	3.55819e-10	0.01238	0.42665	0.48704		0.01238	0.48158
0.00124	0.1973	0.00124	0.14712		0.0124	3.45238e-10	0.0124	0.42596	0.4864		0.0124	0.48087
0.00124	0.19689	0.00124	0.14675		0.01242	3.34971e-10	0.01242	0.42527	0.48576		0.01242	0.48017
0.00124	0.19647	0.00124	0.14639		0.01243	3.2501e-10	0.01243	0.42457	0.48513		0.01243	0.47946
0.00124	0.19606	0.00124	0.14603		0.01245	3.15345e-10	0.01245	0.42389	0.48449		0.01245	0.47876
0.00125	0.19565	0.00125	0.14567		0.01246	3.05967e-10	0.01246	0.4232	0.48385		0.01246	0.47806
0.00125	0.19524	0.00125	0.14531		0.01248	2.96868e-10	0.01248	0.42251	0.48321		0.01248	0.47736
0.00125	0.19484	0.00125	0.14495		0.0125	2.8804e-10	0.0125	0.42183	0.48257		0.0125	0.47666
0.00125	0.19443	0.00125	0.14459		0.01251	2.79475e-10	0.01251	0.42114	0.48194		0.01251	0.47596
0.00125	0.19402	0.00125	0.14423		0.01253	2.71164e-10	0.01253	0.42046	0.4813		0.01253	0.47526
0.00125	0.19361	0.00125	0.14388		0.01254	2.631e-10	0.01254	0.41977	0.48066		0.01254	0.47456
0.00126	0.19321	0.00126	0.14352		0.01256	2.55276e-10	0.01256	0.41909	0.48002		0.01256	0.47387
0.00126	0.19281	0.00126	0.14317		0.01258	2.47685e-10	0.01258	0.41841	0.47939		0.01258	0.47317
0.00126	0.1924	0.00126	0.14281		0.01259	2.40319e-10	0.01259	0.41773	0.47875		0.01259	0.47248
0.00126	0.192	0.00126	0.14246		0.01261	2.33173e-10	0.01261	0.41706	0.47811		0.01261	0.47178
0.00126	0.1916	0.00126	0.14211		0.01262	2.26239e-10	0.01262	0.41638	0.47747		0.01262	0.47109
0.00126	0.1912	0.00126	0.14176		0.01264	2.19511e-10	0.01264	0.4157	0.47684		0.01264	0.4704
0.00127	0.1908	0.00127	0.14141		0.01266	2.12983e-10	0.01266	0.41503	0.4762		0.01266	0.46971
0.00127	0.1904	0.00127	0.14106		0.01267	2.0665e-10	0.01267	0.41435	0.47556		0.01267	0.46902
0.00127	0.19	0.00127	0.14071		0.01269	2.00504e-10	0.01269	0.41368	0.47492		0.01269	0.46833
0.00127	0.1896	0.00127	0.14036		0.0127	1.94542e-10	0.0127	0.41301	0.47429		0.0127	0.46765
0.00127	0.18921	0.00127	0.14002		0.01272	1.88757e-10	0.01272	0.41234	0.47365		0.01272	0.46696
0.00127	0.18881	0.00127	0.13967		0.01274	1.83144e-10	0.01274	0.41167	0.47301		0.01274	0.46628
0.00128	0.18841	0.00128	0.13933		0.01275	1.77697e-10	0.01275	0.411	0.47237		0.01275	0.46559
0.00128	0.18802	0.00128	0.13898		0.01277	1.72413e-10	0.01277	0.41034	0.47174		0.01277	0.46491
0.00128	0.18763	0.00128	0.13864		0.01278	1.67286e-10	0.01278	0.40967	0.4711		0.01278	0.46423
0.00128	0.18723	0.00128	0.1383		0.0128	1.62311e-10	0.0128	0.40901	0.47046		0.0128	0.46355
0.00128	0.18684	0.00128	0.13795		0.01282	1.57484e-10	0.01282	0.40834	0.46982		0.01282	0.46287
0.00128	0.18645	0.00128	0.13761		0.01283	1.52801e-10	0.01283	0.40768	0.46918		0.01283	0.46219
0.00128	0.18606	0.00128	0.13727		0.01285	1.48257e-10	0.01285	0.40702	0.46855		0.01285	0.46151
0.00129	0.18567	0.00129	0.13693		0.01286	1.43849e-10	0.01286	0.40636	0.46791		0.01286	0.46083
0.00129	0.18528	0.00129	0.1366		0.01288	1.39571e-10	0.01288	0.4057	0.46727		0.01288	0.46016
0.00129	0.1849	0.00129	0.13626		0.0129	1.3542e-10	0.0129	0.40504	0.46663		0.0129	0.45948
0.00129	0.18451	0.00129	0.13592		0.01291	1.31393e-10	0.01291	0.40438	0.466		0.01291	0.45881
0.00129	0.18412	0.00129	0.13559		0.01293	1.27486e-10	0.01293	0.40372	0.46536		0.01293	0.45814
0.00129	0.18374	0.00129	0.13525		0.01294	1.23695e-10	0.01294	0.40307	0.46472		0.01294	0.45746
0.0013	0.18335	0.0013	0.13492		0.01296	1.20016e-10	0.01296	0.40242	0.46408		0.01296	0.45679
0.0013	0.18297	0.0013	0.13458		0.01298	1.16447e-10	0.01298	0.40176	0.46345		0.01298	0.45612
0.0013	0.18259	0.0013	0.13425		0.01299	1.12985e-10	0.01299	0.40111	0.46281		0.01299	0.45545
0.0013	0.18221	0.0013	0.13392		0.01301	1.09625e-10	0.01301	0.40046	0.46217		0.01301	0.45479
0.0013	0.18182	0.0013	0.13359		0.01302	1.06365e-10	0.01302	0.39981	0.46153		0.01302	0.45412
0.0013	0.18144	0.0013	0.13326		0.01304	1.03202e-10	0.01304	0.39916	0.4609		0.01304	0.45345
0.00131	0.18106	0.00131	0.13293		0.01306	1.00133e-10	0.01306	0.39851	0.46026		0.01306	0.45279
0.00131	0.18069	0.00131	0.1326		0.01307	9.7155e-11	0.01307	0.39787	0.45962		0.01307	0.45212
0.00131	0.18031	0.00131	0.13227		0.01309	9.42659e-11	0.01309	0.39722	0.45898		0.01309	0.45146
0.00131	0.17993	0.00131	0.13195		0.0131	9.14627e-11	0.0131	0.39657	0.45835		0.0131	0.4508
0.00131	0.17955	0.00131	0.13162		0.01312	8.87428e-11	0.01312	0.39593	0.45771		0.01312	0.45014
0.00131	0.17918	0.00131	0.1313		0.01314	8.61038e-11	0.01314	0.39529	0.45707		0.01314	0.44948
0.00132	0.1788	0.00132	0.13097		0.01315	8.35433e-11	0.01315	0.39465	0.45643		0.01315	0.44882
0.00132	0.17843	0.00132	0.13065		0.01317	8.10589e-11	0.01317	0.39401	0.45579		0.01317	0.44816
0.00132	0.17806	0.00132	0.13033		0.01318	7.86484e-11	0.01318	0.39337	0.45516		0.01318	0.4475
0.00132	0.17768	0.00132	0.13		0.0132	7.63096e-11	0.0132	0.39273	0.45452		0.0132	0.44684
0.00132	0.17731	0.00132	0.12968		0.01322	7.40403e-11	0.01322	0.39209	0.45388		0.01322	0.44619
0.00132	0.17694	0.00132	0.12936		0.01323	7.18386e-11	0.01323	0.39145	0.45324		0.01323	0.44553
0.00132	0.17657	0.00132	0.12904		0.01325	6.97023e-11	0.01325	0.39082	0.45261		0.01325	0.44488
0.00133	0.1762	0.00133	0.12872		0.01326	6.76295e-11	0.01326	0.39019	0.45197		0.01326	0.44423
0.00133	0.17583	0.00133	0.12841		0.01328	6.56183e-11	0.01328	0.38955	0.45133		0.01328	0.44358
0.00133	0.17547	0.00133	0.12809		0.0133	6.3667e-11	0.0133	0.38892	0.45069		0.0133	0.44293
0.00133	0.1751	0.00133	0.12777		0.01331	6.17737e-11	0.01331	0.38829	0.45006		0.01331	0.44228
0.00133	0.17473	0.00133	0.12746		0.01333	5.99367e-11	0.01333	0.38766	0.44942		0.01333	0.44163
0.00133	0.17437	0.00133	0.12714		0.01334	5.81543e-11	0.01334	0.38703	0.44878		0.01334	0.44098
0.00134	0.174	0.00134	0.12683		0.01336	5.6425e-11	0.01336	0.3864	0.44814		0.01336	0.44033
0.00134	0.17364	0.00134	0.12652		0.01338	5.4747e-11	0.01338	0.38577	0.44751		0.01338	0.43969
0.00134	0.17327	0.00134	0.1262		0.01339	5.3119e-11	0.01339	0.38515	0.44687		0.01339	0.43904
0.00134	0.17291	0.00134	0.12589		0.01341	5.15394e-11	0.01341	0.38452	0.44623		0.01341	0.4384
0.00134	0.17255	0.00134	0.12558		0.01342	5.00067e-11	0.01342	0.3839	0.44559		0.01342	0.43776
0.00134	0.17219	0.00134	0.12527		0.01344	4.85196e-11	0.01344	0.38328	0.44495		0.01344	0.43711
0.00135	0.17183	0.00135	0.12496		0.01346	4.70768e-11	0.01346	0.38265	0.44432		0.01346	0.43647
0.00135	0.17147	0.00135	0.12465		0.01347	4.56768e-11	0.01347	0.38203	0.44368		0.01347	0.43583
0.00135	0.17111	0.00135	0.12434		0.01349	4.43185e-11	0.01349	0.38141	0.44304		0.01349	0.43519
0.00135	0.17075	0.00135	0.12404		0.0135	4.30006e-11	0.0135	0.38079	0.4424		0.0135	0.43455
0.00135	0.1704	0.00135	0.12373		0.01352	4.17219e-11	0.01352	0.38017	0.44177		0.01352	0.43392
0.00135	0.17004	0.00135	0.12343		0.01354	4.04811e-11	0.01354	0.37956	0.44113		0.01354	0.43328
0.00136	0.16968	0.00136	0.12312		0.01355	3.92773e-11	0.01355	0.37894	0.44049		0.01355	0.43265
0.00136	0.16933	0.00136	0.12282		0.01357	3.81093e-11	0.01357	0.37833	0.43985		0.01357	0.43201
0.00136	0.16897	0.00136	0.12251		0.01358	3.6976e-11	0.01358	0.37771	0.43922		0.01358	0.43138
0.00136	0.16862	0.00136	0.12221		0.0136	3.58765e-11	0.0136	0.3771	0.43858		0.0136	0.43074
0.00136	0.16827	0.00136	0.12191		0.01362	3.48096e-11	0.01362	0.37649	0.43794		0.01362	0.43011
0.00136	0.16792	0.00136	0.12161		0.01363	3.37744e-11	0.01363	0.37588	0.4373		0.01363	0.42948
0.00136	0.16756	0.00136	0.12131		0.01365	3.27701e-11	0.01365	0.37527	0.43667		0.01365	0.42885
0.00137	0.16721	0.00137	0.12101		0.01366	3.17956e-11	0.01366	0.37466	0.43603		0.01366	0.42822
0.00137	0.16686	0.00137	0.12071		0.01368	3.085e-11	0.01368	0.37405	0.43539		0.01368	0.42759
0.00137	0.16651	0.00137	0.12041		0.0137	2.99326e-11	0.0137	0.37344	0.43475		0.0137	0.42697
0.00137	0.16617	0.00137	0.12011		0.01371	2.90425e-11	0.01371	0.37284	0.43412		0.01371	0.42634
0.00137	0.16582	0.00137	0.11982		0.01373	2.81789e-11	0.01373	0.37223	0.43348		0.01373	0.42572
0.00137	0.16547	0.00137	0.11952		0.01374	2.73409e-11	0.01374	0.37163	0.43284		0.01374	0.42509
0.00138	0.16513	0.00138	0.11923		0.01376	2.65278e-11	0.01376	0.37102	0.4322		0.01376	0.42447
0.00138	0.16478	0.00138	0.11893		0.01378	2.5739e-11	0.01378	0.37042	0.43156		0.01378	0.42384
0.00138	0.16444	0.00138	0.11864		0.01379	2.49736e-11	0.01379	0.36982	0.43093		0.01379	0.42322
0.00138	0.16409	0.00138	0.11834		0.01381	2.42309e-11	0.01381	0.36922	0.43029		0.01381	0.4226
0.00138	0.16375	0.00138	0.11805		0.01382	2.35103e-11	0.01382	0.36862	0.42965		0.01382	0.42198
0.00138	0.16341	0.00138	0.11776		0.01384	2.28112e-11	0.01384	0.36802	0.42901		0.01384	0.42136
0.00139	0.16306	0.00139	0.11747		0.01386	2.21328e-11	0.01386	0.36743	0.42838		0.01386	0.42075
0.00139	0.16272	0.00139	0.11718		0.01387	2.14747e-11	0.01387	0.36683	0.42774		0.01387	0.42013
0.00139	0.16238	0.00139	0.11689		0.01389	2.08361e-11	0.01389	0.36623	0.4271		0.01389	0.41951
0.00139	0.16204	0.00139	0.1166		0.0139	2.02165e-11	0.0139	0.36564	0.42646		0.0139	0.4189
0.00139	0.1617	0.00139	0.11631		0.01392	1.96153e-11	0.01392	0.36505	0.42583		0.01392	0.41828
0.00139	0.16137	0.00139	0.11603		0.01394	1.9032e-11	0.01394	0.36445	0.42519		0.01394	0.41767
0.0014	0.16103	0.0014	0.11574		0.01395	1.8466e-11	0.01395	0.36386	0.42455		0.01395	0.41706
0.0014	0.16069	0.0014	0.11545		0.01397	1.79169e-11	0.01397	0.36327	0.42391		0.01397	0.41644
0.0014	0.16035	0.0014	0.11517		0.01398	1.73841e-11	0.01398	0.36268	0.42328		0.01398	0.41583
0.0014	0.16002	0.0014	0.11488		0.014	1.68671e-11	0.014	0.36209	0.42264		0.014	0.41522
0.0014	0.15968	0.0014	0.1146		0.01402	1.63655e-11	0.01402	0.36151	0.422		0.01402	0.41461
0.0014	0.15935	0.0014	0.11432		0.01403	1.58788e-11	0.01403	0.36092	0.42136		0.01403	0.41401
0.0014	0.15902	0.0014	0.11403		0.01405	1.54066e-11	0.01405	0.36033	0.42073		0.01405	0.4134
0.00141	0.15868	0.00141	0.11375		0.01406	1.49485e-11	0.01406	0.35975	0.42009		0.01406	0.41279
0.00141	0.15835	0.00141	0.11347		0.01408	1.4504e-11	0.01408	0.35916	0.41945		0.01408	0.41219
0.00141	0.15802	0.00141	0.11319		0.0141	1.40726e-11	0.0141	0.35858	0.41881		0.0141	0.41158
0.00141	0.15769	0.00141	0.11291		0.01411	1.36542e-11	0.01411	0.358	0.41817		0.01411	0.41098
0.00141	0.15736	0.00141	0.11263		0.01413	1.32481e-11	0.01413	0.35742	0.41754		0.01413	0.41038
0.00141	0.15703	0.00141	0.11236		0.01414	1.28541e-11	0.01414	0.35684	0.4169		0.01414	0.40977
0.00142	0.1567	0.00142	0.11208		0.01416	1.24719e-11	0.01416	0.35626	0.41626		0.01416	0.40917
0.00142	0.15638	0.00142	0.1118		0.01418	1.2101e-11	0.01418	0.35568	0.41562		0.01418	0.40857
0.00142	0.15605	0.00142	0.11152		0.01419	1.17412e-11	0.01419	0.3551	0.41499		0.01419	0.40797
0.00142	0.15572	0.00142	0.11125		0.01421	1.1392e-11	0.01421	0.35453	0.41435		0.01421	0.40738
0.00142	0.1554	0.00142	0.11097		0.01422	1.10532e-11	0.01422	0.35395	0.41371		0.01422	0.40678
0.00142	0.15507	0.00142	0.1107		0.01424	1.07245e-11	0.01424	0.35338	0.41307		0.01424	0.40618
0.00143	0.15475	0.00143	0.11043		0.01426	1.04056e-11	0.01426	0.3528	0.41244		0.01426	0.40559
0.00143	0.15442	0.00143	0.11015		0.01427	1.00962e-11	0.01427	0.35223	0.4118		0.01427	0.40499
0.00143	0.1541	0.00143	0.10988		0.01429	9.79594e-12	0.01429	0.35166	0.41116		0.01429	0.4044
0.00143	0.15378	0.00143	0.10961		0.0143	9.50464e-12	0.0143	0.35109	0.41052		0.0143	0.4038
0.00143	0.15346	0.00143	0.10934		0.01432	9.22199e-12	0.01432	0.35052	0.40989		0.01432	0.40321
0.00143	0.15313	0.00143	0.10907		0.01434	8.94775e-12	0.01434	0.34995	0.40925		0.01434	0.40262
0.00144	0.15281	0.00144	0.1088		0.01435	8.68167e-12	0.01435	0.34938	0.40861		0.01435	0.40203
0.00144	0.15249	0.00144	0.10853		0.01437	8.4235e-12	0.01437	0.34881	0.40797		0.01437	0.40144
0.00144	0.15218	0.00144	0.10826		0.01438	8.173e-12	0.01438	0.34825	0.40733		0.01438	0.40085
0.00144	0.15186	0.00144	0.108		0.0144	7.92996e-12	0.0144	0.34768	0.4067		0.0144	0.40026
0.00144	0.15154	0.00144	0.10773		0.01442	7.69414e-12	0.01442	0.34712	0.40606		0.01442	0.39967
0.00144	0.15122	0.00144	0.10746		0.01443	7.46534e-12	0.01443	0.34656	0.40542		0.01443	0.39909
0.00144	0.15091	0.00144	0.1072		0.01445	7.24333e-12	0.01445	0.34599	0.40478		0.01445	0.3985
0.00145	0.15059	0.00145	0.10693		0.01446	7.02794e-12	0.01446	0.34543	0.40415		0.01446	0.39792
0.00145	0.15028	0.00145	0.10667		0.01448	6.81894e-12	0.01448	0.34487	0.40351		0.01448	0.39734
0.00145	0.14996	0.00145	0.10641		0.0145	6.61616e-12	0.0145	0.34431	0.40287		0.0145	0.39675
0.00145	0.14965	0.00145	0.10614		0.01451	6.41941e-12	0.01451	0.34375	0.40223		0.01451	0.39617
0.00145	0.14933	0.00145	0.10588		0.01453	6.22852e-12	0.01453	0.34319	0.4016		0.01453	0.39559
0.00145	0.14902	0.00145	0.10562		0.01454	6.0433e-12	0.01454	0.34264	0.40096		0.01454	0.39501
0.00146	0.14871	0.00146	0.10536		0.01456	5.86358e-12	0.01456	0.34208	0.40032		0.01456	0.39443
0.00146	0.1484	0.00146	0.1051		0.01458	5.68921e-12	0.01458	0.34153	0.39968		0.01458	0.39385
0.00146	0.14809	0.00146	0.10484		0.01459	5.52003e-12	0.01459	0.34097	0.39905		0.01459	0.39327
0.00146	0.14778	0.00146	0.10458		0.01461	5.35588e-12	0.01461	0.34042	0.39841		0.01461	0.3927
0.00146	0.14747	0.00146	0.10432		0.01462	5.19661e-12	0.01462	0.33987	0.39777		0.01462	0.39212
0.00146	0.14716	0.00146	0.10406		0.01464	5.04207e-12	0.01464	0.33931	0.39713		0.01464	0.39155
0.00147	0.14685	0.00147	0.10381		0.01466	4.89214e-12	0.01466	0.33876	0.3965		0.01466	0.39097
0.00147	0.14655	0.00147	0.10355		0.01467	4.74666e-12	0.01467	0.33821	0.39586		0.01467	0.3904
0.00147	0.14624	0.00147	0.10329		0.01469	4.6055e-12	0.01469	0.33766	0.3953		0.01469	0.38982
0.00147	0.14593	0.00147	0.10304		0.0147	4.46854e-12	0.0147	0.33712	0.39477		0.0147	0.38925
0.00147	0.14563	0.00147	0.10278		0.01472	4.33566e-12	0.01472	0.33657	0.39424		0.01472	0.38868
0.00147	0.14532	0.00147	0.10253		0.01474	4.20673e-12	0.01474	0.33602	0.39371		0.01474	0.38811
0.00148	0.14502	0.00148	0.10228		0.01475	4.08163e-12	0.01475	0.33548	0.39318		0.01475	0.38754
0.00148	0.14472	0.00148	0.10203		0.01477	3.96025e-12	0.01477	0.33493	0.39265		0.01477	0.38697
0.00148	0.14441	0.00148	0.10177		0.01478	3.84249e-12	0.01478	0.33439	0.39212		0.01478	0.38641
0.00148	0.14411	0.00148	0.10152		0.0148	3.72822e-12	0.0148	0.33385	0.39159		0.0148	0.38584
0.00148	0.14381	0.00148	0.10127		0.01482	3.61735e-12	0.01482	0.3333	0.39106		0.01482	0.38527
0.00148	0.14351	0.00148	0.10102		0.01483	3.50978e-12	0.01483	0.33276	0.39053		0.01483	0.38471
0.00148	0.14321	0.00148	0.10077		0.01485	3.40541e-12	0.01485	0.33222	0.39		0.01485	0.38414
0.00149	0.14291	0.00149	0.10052		0.01486	3.30414e-12	0.01486	0.33168	0.38946		0.01486	0.38358
0.00149	0.14261	0.00149	0.10027		0.01488	3.20588e-12	0.01488	0.33115	0.38893		0.01488	0.38302
0.00149	0.14231	0.00149	0.10003		0.0149	3.11055e-12	0.0149	0.33061	0.3884		0.0149	0.38246
0.00149	0.14201	0.00149	0.09978		0.01491	3.01805e-12	0.01491	0.33007	0.38787		0.01491	0.3819
0.00149	0.14172	0.00149	0.09953		0.01493	2.9283e-12	0.01493	0.32954	0.38734		0.01493	0.38134
0.00149	0.14142	0.00149	0.09929		0.01494	2.84122e-12	0.01494	0.329	0.38681		0.01494	0.38078
0.0015	0.14112	0.0015	0.09904		0.01496	2.75673e-12	0.01496	0.32847	0.38628		0.01496	0.38022
0.0015	0.14083	0.0015	0.0988		0.01498	2.67475e-12	0.01498	0.32793	0.38575		0.01498	0.37966
0.0015	0.14053	0.0015	0.09855		0.01499	2.59521e-12	0.01499	0.3274	0.38522		0.01499	0.3791
0.0015	0.14024	0.0015	0.09831		0.01501	2.51803e-12	0.01501	0.32687	0.38469		0.01501	0.37855
0.0015	0.13995	0.0015	0.09807		0.01502	2.44315e-12	0.01502	0.32634	0.38416		0.01502	0.37799
0.0015	0.13965	0.0015	0.09783		0.01504	2.3705e-12	0.01504	0.32581	0.38363		0.01504	0.37744
0.00151	0.13936	0.00151	0.09758		0.01506	2.30001e-12	0.01506	0.32528	0.38309		0.01506	0.37688
0.00151	0.13907	0.00151	0.09734		0.01507	2.23161e-12	0.01507	0.32475	0.38256		0.01507	0.37633
0.00151	0.13878	0.00151	0.0971		0.01509	2.16525e-12	0.01509	0.32423	0.38203		0.01509	0.37578
0.00151	0.13849	0.00151	0.09686		0.0151	2.10086e-12	0.0151	0.3237	0.3815		0.0151	0.37523
0.00151	0.1382	0.00151	0.09662		0.01512	2.03838e-12	0.01512	0.32318	0.38097		0.01512	0.37468
0.00151	0.13791	0.00151	0.09638		0.01514	1.97777e-12	0.01514	0.32265	0.38044		0.01514	0.37413
0.00152	0.13762	0.00152	0.09615		0.01515	1.91895e-12	0.01515	0.32213	0.37991		0.01515	0.37358
0.00152	0.13733	0.00152	0.09591		0.01517	1.86189e-12	0.01517	0.3216	0.37938		0.01517	0.37303
0.00152	0.13705	0.00152	0.09567		0.01518	1.80652e-12	0.01518	0.32108	0.37885		0.01518	0.37248
0.00152	0.13676	0.00152	0.09544		0.0152	1.7528e-12	0.0152	0.32056	0.37832		0.0152	0.37194
0.00152	0.13647	0.00152	0.0952		0.01522	1.70067e-12	0.01522	0.32004	0.37779		0.01522	0.37139
0.00152	0.13619	0.00152	0.09496		0.01523	1.6501e-12	0.01523	0.31952	0.37726		0.01523	0.37085
0.00152	0.1359	0.00152	0.09473		0.01525	1.60103e-12	0.01525	0.319	0.37672		0.01525	0.3703
0.00153	0.13562	0.00153	0.0945		0.01526	1.55342e-12	0.01526	0.31849	0.37619		0.01526	0.36976
0.00153	0.13534	0.00153	0.09426		0.01528	1.50723e-12	0.01528	0.31797	0.37566		0.01528	0.36922
0.00153	0.13505	0.00153	0.09403		0.0153	1.4624e-12	0.0153	0.31745	0.37513		0.0153	0.36868
0.00153	0.13477	0.00153	0.0938		0.01531	1.41892e-12	0.01531	0.31694	0.3746		0.01531	0.36814
0.00153	0.13449	0.00153	0.09357		0.01533	1.37672e-12	0.01533	0.31642	0.37407		0.01533	0.3676
0.00153	0.13421	0.00153	0.09333		0.01534	1.33578e-12	0.01534	0.31591	0.37354		0.01534	0.36706
0.00154	0.13393	0.00154	0.0931		0.01536	1.29606e-12	0.01536	0.3154	0.37301		0.01536	0.36652
0.00154	0.13365	0.00154	0.09287		0.01538	1.25752e-12	0.01538	0.31488	0.37248		0.01538	0.36598
0.00154	0.13337	0.00154	0.09265		0.01539	1.22012e-12	0.01539	0.31437	0.37195		0.01539	0.36544
0.00154	0.13309	0.00154	0.09242		0.01541	1.18384e-12	0.01541	0.31386	0.37142		0.01541	0.36491
0.00154	0.13281	0.00154	0.09219		0.01542	1.14863e-12	0.01542	0.31335	0.37089		0.01542	0.36437
0.00154	0.13253	0.00154	0.09196		0.01544	1.11448e-12	0.01544	0.31284	0.37035		0.01544	0.36384
0.00155	0.13225	0.00155	0.09173		0.01546	1.08133e-12	0.01546	0.31234	0.36982		0.01546	0.3633
0.00155	0.13198	0.00155	0.09151		0.01547	1.04918e-12	0.01547	0.31183	0.36929		0.01547	0.36277
0.00155	0.1317	0.00155	0.09128		0.01549	1.01798e-12	0.01549	0.31132	0.36876		0.01549	0.36224
0.00155	0.13142	0.00155	0.09106		0.0155	9.87705e-13	0.0155	0.31082	0.36823		0.0155	0.36171
0.00155	0.13115	0.00155	0.09083		0.01552	9.58333e-13	0.01552	0.31031	0.3677		0.01552	0.36118
0.00155	0.13088	0.00155	0.09061		0.01554	9.29835e-13	0.01554	0.30981	0.36717		0.01554	0.36065
0.00156	0.1306	0.00156	0.09038		0.01555	9.02184e-13	0.01555	0.30931	0.36664		0.01555	0.36012
0.00156	0.13033	0.00156	0.09016		0.01557	8.75355e-13	0.01557	0.30881	0.36611		0.01557	0.35959
0.00156	0.13006	0.00156	0.08994		0.01558	8.49324e-13	0.01558	0.3083	0.36558		0.01558	0.35906
0.00156	0.12978	0.00156	0.08971		0.0156	8.24067e-13	0.0156	0.3078	0.36505		0.0156	0.35854
0.00156	0.12951	0.00156	0.08949		0.01562	7.99561e-13	0.01562	0.3073	0.36452		0.01562	0.35801
0.00156	0.12924	0.00156	0.08927		0.01563	7.75784e-13	0.01563	0.30681	0.36398		0.01563	0.35748
0.00156	0.12897	0.00156	0.08905		0.01565	7.52714e-13	0.01565	0.30631	0.36345		0.01565	0.35696
0.00157	0.1287	0.00157	0.08883		0.01566	7.30331e-13	0.01566	0.30581	0.36292		0.01566	0.35644
0.00157	0.12843	0.00157	0.08861		0.01568	7.08612e-13	0.01568	0.30531	0.36239		0.01568	0.35591
0.00157	0.12816	0.00157	0.08839		0.0157	6.8754e-13	0.0157	0.30482	0.36186		0.0157	0.35539
0.00157	0.1279	0.00157	0.08817		0.01571	6.67094e-13	0.01571	0.30432	0.36133		0.01571	0.35487
0.00157	0.12763	0.00157	0.08796		0.01573	6.47256e-13	0.01573	0.30383	0.3608		0.01573	0.35435
0.00157	0.12736	0.00157	0.08774		0.01574	6.28009e-13	0.01574	0.30334	0.36027		0.01574	0.35383
0.00158	0.12709	0.00158	0.08752		0.01576	6.09333e-13	0.01576	0.30284	0.35974		0.01576	0.35331
0.00158	0.12683	0.00158	0.08731		0.01578	5.91213e-13	0.01578	0.30235	0.35921		0.01578	0.35279
0.00158	0.12656	0.00158	0.08709		0.01579	5.73632e-13	0.01579	0.30186	0.35868		0.01579	0.35228
0.00158	0.1263	0.00158	0.08688		0.01581	5.56573e-13	0.01581	0.30137	0.35815		0.01581	0.35176
0.00158	0.12603	0.00158	0.08666		0.01582	5.40022e-13	0.01582	0.30088	0.35761		0.01582	0.35124
0.00158	0.12577	0.00158	0.08645		0.01584	5.23963e-13	0.01584	0.3004	0.35708		0.01584	0.35073
0.00159	0.12551	0.00159	0.08623		0.01586	5.08382e-13	0.01586	0.29991	0.35655		0.01586	0.35021
0.00159	0.12524	0.00159	0.08602		0.01587	4.93264e-13	0.01587	0.29942	0.35602		0.01587	0.3497
0.00159	0.12498	0.00159	0.08581		0.01589	4.78596e-13	0.01589	0.29893	0.35549		0.01589	0.34919
0.00159	0.12472	0.00159	0.0856		0.0159	4.64363e-13	0.0159	0.29845	0.35496		0.0159	0.34867
0.00159	0.12446	0.00159	0.08538		0.01592	4.50554e-13	0.01592	0.29797	0.35443		0.01592	0.34816
0.00159	0.1242	0.00159	0.08517		0.01594	4.37156e-13	0.01594	0.29748	0.3539		0.01594	0.34765
0.0016	0.12394	0.0016	0.08496		0.01595	4.24156e-13	0.01595	0.297	0.35337		0.01595	0.34714
0.0016	0.12368	0.0016	0.08475		0.01597	4.11543e-13	0.01597	0.29652	0.35284		0.01597	0.34663
0.0016	0.12342	0.0016	0.08454		0.01598	3.99304e-13	0.01598	0.29604	0.35231		0.01598	0.34612
0.0016	0.12316	0.0016	0.08434		0.016	3.8743e-13	0.016	0.29555	0.35178		0.016	0.34562
0.0016	0.12291	0.0016	0.08413		0.01602	3.75909e-13	0.01602	0.29508	0.35124		0.01602	0.34511
0.0016	0.12265	0.0016	0.08392		0.01603	3.6473e-13	0.01603	0.2946	0.35071		0.01603	0.3446
0.0016	0.12239	0.0016	0.08371		0.01605	3.53884e-13	0.01605	0.29412	0.35018		0.01605	0.3441
0.00161	0.12214	0.00161	0.08351		0.01606	3.4336e-13	0.01606	0.29364	0.34965		0.01606	0.34359
0.00161	0.12188	0.00161	0.0833		0.01608	3.3315e-13	0.01608	0.29316	0.34912		0.01608	0.34309
0.00161	0.12163	0.00161	0.08309		0.0161	3.23243e-13	0.0161	0.29269	0.34859		0.0161	0.34259
0.00161	0.12137	0.00161	0.08289		0.01611	3.1363e-13	0.01611	0.29221	0.34806		0.01611	0.34208
0.00161	0.12112	0.00161	0.08268		0.01613	3.04304e-13	0.01613	0.29174	0.34753		0.01613	0.34158
0.00161	0.12086	0.00161	0.08248		0.01614	2.95254e-13	0.01614	0.29127	0.347		0.01614	0.34108
0.00162	0.12061	0.00162	0.08228		0.01616	2.86474e-13	0.01616	0.29079	0.34647		0.01616	0.34058
0.00162	0.12036	0.00162	0.08207		0.01618	2.77955e-13	0.01618	0.29032	0.34594		0.01618	0.34008
0.00162	0.12011	0.00162	0.08187		0.01619	2.69689e-13	0.01619	0.28985	0.34541		0.01619	0.33958
0.00162	0.11986	0.00162	0.08167		0.01621	2.61669e-13	0.01621	0.28938	0.34487		0.01621	0.33908
0.00162	0.11961	0.00162	0.08147		0.01622	2.53888e-13	0.01622	0.28891	0.34434		0.01622	0.33859
0.00162	0.11935	0.00162	0.08126		0.01624	2.46338e-13	0.01624	0.28844	0.34381		0.01624	0.33809
0.00163	0.11911	0.00163	0.08106		0.01626	2.39013e-13	0.01626	0.28797	0.34328		0.01626	0.33759
0.00163	0.11886	0.00163	0.08086		0.01627	2.31905e-13	0.01627	0.28751	0.34275		0.01627	0.3371
0.00163	0.11861	0.00163	0.08066		0.01629	2.25009e-13	0.01629	0.28704	0.34222		0.01629	0.3366
0.00163	0.11836	0.00163	0.08046		0.0163	2.18317e-13	0.0163	0.28657	0.34169		0.0163	0.33611
0.00163	0.11811	0.00163	0.08027		0.01632	2.11825e-13	0.01632	0.28611	0.34116		0.01632	0.33562
0.00163	0.11786	0.00163	0.08007		0.01634	2.05526e-13	0.01634	0.28564	0.34063		0.01634	0.33513
0.00164	0.11762	0.00164	0.07987		0.01635	1.99414e-13	0.01635	0.28518	0.3401		0.01635	0.33463
0.00164	0.11737	0.00164	0.07967		0.01637	1.93484e-13	0.01637	0.28472	0.33957		0.01637	0.33414
0.00164	0.11713	0.00164	0.07948		0.01638	1.8773e-13	0.01638	0.28425	0.33904		0.01638	0.33365
0.00164	0.11688	0.00164	0.07928		0.0164	1.82148e-13	0.0164	0.28379	0.3385		0.0164	0.33316
0.00164	0.11664	0.00164	0.07908		0.01642	1.76731e-13	0.01642	0.28333	0.33797		0.01642	0.33267
0.00164	0.11639	0.00164	0.07889		0.01643	1.71476e-13	0.01643	0.28287	0.33744		0.01643	0.33219
0.00164	0.11615	0.00164	0.07869		0.01645	1.66376e-13	0.01645	0.28241	0.33691		0.01645	0.3317
0.00165	0.11591	0.00165	0.0785		0.01646	1.61429e-13	0.01646	0.28196	0.33638		0.01646	0.33121
0.00165	0.11566	0.00165	0.07831		0.01648	1.56628e-13	0.01648	0.2815	0.33585		0.01648	0.33073
0.00165	0.11542	0.00165	0.07811		0.0165	1.5197e-13	0.0165	0.28104	0.33532		0.0165	0.33024
0.00165	0.11518	0.00165	0.07792		0.01651	1.47451e-13	0.01651	0.28058	0.33479		0.01651	0.32976
0.00165	0.11494	0.00165	0.07773		0.01653	1.43066e-13	0.01653	0.28013	0.33426		0.01653	0.32927
0.00165	0.1147	0.00165	0.07753		0.01654	1.38812e-13	0.01654	0.27967	0.33373		0.01654	0.32879
0.00166	0.11446	0.00166	0.07734		0.01656	1.34684e-13	0.01656	0.27922	0.3332		0.01656	0.32831
0.00166	0.11422	0.00166	0.07715		0.01658	1.30679e-13	0.01658	0.27877	0.33267		0.01658	0.32783
0.00166	0.11398	0.00166	0.07696		0.01659	1.26793e-13	0.01659	0.27831	0.33213		0.01659	0.32735
0.00166	0.11374	0.00166	0.07677		0.01661	1.23022e-13	0.01661	0.27786	0.3316		0.01661	0.32687
0.00166	0.1135	0.00166	0.07658		0.01662	1.19364e-13	0.01662	0.27741	0.33107		0.01662	0.32639
0.00166	0.11327	0.00166	0.07639		0.01664	1.15814e-13	0.01664	0.27696	0.33054		0.01664	0.32591
0.00167	0.11303	0.00167	0.0762		0.01666	1.1237e-13	0.01666	0.27651	0.33001		0.01666	0.32543
0.00167	0.11279	0.00167	0.07602		0.01667	1.09029e-13	0.01667	0.27606	0.32948		0.01667	0.32495
0.00167	0.11256	0.00167	0.07583		0.01669	1.05786e-13	0.01669	0.27562	0.32895		0.01669	0.32448
0.00167	0.11232	0.00167	0.07564		0.0167	1.02641e-13	0.0167	0.27517	0.32842		0.0167	0.324
0.00167	0.11209	0.00167	0.07545		0.01672	9.95883e-14	0.01672	0.27472	0.32789		0.01672	0.32352
0.00167	0.11185	0.00167	0.07527		0.01674	9.66268e-14	0.01674	0.27428	0.32736		0.01674	0.32305
0.00168	0.11162	0.00168	0.07508		0.01675	9.37533e-14	0.01675	0.27383	0.32683		0.01675	0.32258
0.00168	0.11138	0.00168	0.0749		0.01677	9.09653e-14	0.01677	0.27339	0.3263		0.01677	0.3221
0.00168	0.11115	0.00168	0.07471		0.01678	8.82602e-14	0.01678	0.27294	0.32576		0.01678	0.32163
0.00168	0.11092	0.00168	0.07453		0.0168	8.56356e-14	0.0168	0.2725	0.32523		0.0168	0.32116
0.00168	0.11069	0.00168	0.07434		0.01682	8.3089e-14	0.01682	0.27206	0.3247		0.01682	0.32069
0.00168	0.11046	0.00168	0.07416		0.01683	8.06181e-14	0.01683	0.27162	0.32417		0.01683	0.32022
0.00168	0.11022	0.00168	0.07398		0.01685	7.82208e-14	0.01685	0.27117	0.32364		0.01685	0.31975
0.00169	0.10999	0.00169	0.07379		0.01686	7.58947e-14	0.01686	0.27073	0.32311		0.01686	0.31928
0.00169	0.10976	0.00169	0.07361		0.01688	7.36377e-14	0.01688	0.2703	0.32258		0.01688	0.31881
0.00169	0.10953	0.00169	0.07343		0.0169	7.14479e-14	0.0169	0.26986	0.32205		0.0169	0.31834
0.00169	0.10931	0.00169	0.07325		0.01691	6.93232e-14	0.01691	0.26942	0.32152		0.01691	0.31788
0.00169	0.10908	0.00169	0.07307		0.01693	6.72617e-14	0.01693	0.26898	0.32099		0.01693	0.31741
0.00169	0.10885	0.00169	0.07289		0.01694	6.52615e-14	0.01694	0.26854	0.32046		0.01694	0.31694
0.0017	0.10862	0.0017	0.07271		0.01696	6.33208e-14	0.01696	0.26811	0.31993		0.01696	0.31648
0.0017	0.10839	0.0017	0.07253		0.01698	6.14378e-14	0.01698	0.26767	0.31939		0.01698	0.31601
0.0017	0.10817	0.0017	0.07235		0.01699	5.96108e-14	0.01699	0.26724	0.31886		0.01699	0.31555
0.0017	0.10794	0.0017	0.07217		0.01701	5.78381e-14	0.01701	0.26681	0.31833		0.01701	0.31509
0.0017	0.10771	0.0017	0.07199		0.01702	5.61182e-14	0.01702	0.26637	0.3178		0.01702	0.31463
0.0017	0.10749	0.0017	0.07181		0.01704	5.44493e-14	0.01704	0.26594	0.31727		0.01704	0.31416
0.00171	0.10726	0.00171	0.07164		0.01706	5.28302e-14	0.01706	0.26551	0.31674		0.01706	0.3137
0.00171	0.10704	0.00171	0.07146		0.01707	5.12591e-14	0.01707	0.26508	0.31621		0.01707	0.31324
0.00171	0.10682	0.00171	0.07128		0.01709	4.97348e-14	0.01709	0.26465	0.31568		0.01709	0.31278
0.00171	0.10659	0.00171	0.07111		0.0171	4.82558e-14	0.0171	0.26422	0.31515		0.0171	0.31233
0.00171	0.10637	0.00171	0.07093		0.01712	4.68208e-14	0.01712	0.26379	0.31462		0.01712	0.31187
0.00171	0.10615	0.00171	0.07076		0.01714	4.54285e-14	0.01714	0.26336	0.31409		0.01714	0.31141
0.00172	0.10592	0.00172	0.07058		0.01715	4.40775e-14	0.01715	0.26293	0.31356		0.01715	0.31095
0.00172	0.1057	0.00172	0.07041		0.01717	4.27668e-14	0.01717	0.26251	0.31302		0.01717	0.3105
0.00172	0.10548	0.00172	0.07023		0.01718	4.1495e-14	0.01718	0.26208	0.31249		0.01718	0.31004
0.00172	0.10526	0.00172	0.07006		0.0172	4.0261e-14	0.0172	0.26166	0.31196		0.0172	0.30959
0.00172	0.10504	0.00172	0.06989		0.01722	3.90638e-14	0.01722	0.26123	0.31143		0.01722	0.30913
0.00172	0.10482	0.00172	0.06971		0.01723	3.79021e-14	0.01723	0.26081	0.3109		0.01723	0.30868
0.00172	0.1046	0.00172	0.06954		0.01725	3.6775e-14	0.01725	0.26038	0.31037		0.01725	0.30823
0.00173	0.10438	0.00173	0.06937		0.01726	3.56814e-14	0.01726	0.25996	0.30984		0.01726	0.30777
0.00173	0.10416	0.00173	0.0692		0.01728	3.46203e-14	0.01728	0.25954	0.30931		0.01728	0.30732
0.00173	0.10395	0.00173	0.06903		0.0173	3.35908e-14	0.0173	0.25912	0.30878		0.0173	0.30687
0.00173	0.10373	0.00173	0.06886		0.01731	3.25919e-14	0.01731	0.2587	0.30825		0.01731	0.30642
0.00173	0.10351	0.00173	0.06869		0.01733	3.16227e-14	0.01733	0.25828	0.30772		0.01733	0.30597
0.00173	0.1033	0.00173	0.06852		0.01734	3.06823e-14	0.01734	0.25786	0.30719		0.01734	0.30552
0.00174	0.10308	0.00174	0.06835		0.01736	2.97699e-14	0.01736	0.25744	0.30665		0.01736	0.30508
0.00174	0.10286	0.00174	0.06818		0.01738	2.88846e-14	0.01738	0.25702	0.30612		0.01738	0.30463
0.00174	0.10265	0.00174	0.06801		0.01739	2.80256e-14	0.01739	0.2566	0.30559		0.01739	0.30418
0.00174	0.10243	0.00174	0.06784		0.01741	2.71922e-14	0.01741	0.25619	0.30506		0.01741	0.30374
0.00174	0.10222	0.00174	0.06767		0.01742	2.63836e-14	0.01742	0.25577	0.30453		0.01742	0.30329
0.00174	0.10201	0.00174	0.06751		0.01744	2.5599e-14	0.01744	0.25536	0.304		0.01744	0.30284
0.00175	0.10179	0.00175	0.06734		0.01746	2.48378e-14	0.01746	0.25494	0.30347		0.01746	0.3024
0.00175	0.10158	0.00175	0.06717		0.01747	2.40992e-14	0.01747	0.25453	0.30294		0.01747	0.30196
0.00175	0.10137	0.00175	0.06701		0.01749	2.33825e-14	0.01749	0.25412	0.30241		0.01749	0.30151
0.00175	0.10116	0.00175	0.06684		0.0175	2.26872e-14	0.0175	0.2537	0.30188		0.0175	0.30107
0.00175	0.10094	0.00175	0.06668		0.01752	2.20125e-14	0.01752	0.25329	0.30135		0.01752	0.30063
0.00175	0.10073	0.00175	0.06651		0.01754	2.13579e-14	0.01754	0.25288	0.30082		0.01754	0.30019
0.00176	0.10052	0.00176	0.06635		0.01755	2.07228e-14	0.01755	0.25247	0.30028		0.01755	0.29975
0.00176	0.10031	0.00176	0.06619		0.01757	2.01065e-14	0.01757	0.25206	0.29975		0.01757	0.29931
0.00176	0.1001	0.00176	0.06602		0.01758	1.95086e-14	0.01758	0.25165	0.29922		0.01758	0.29887
0.00176	0.09989	0.00176	0.06586		0.0176	1.89285e-14	0.0176	0.25124	0.29869		0.0176	0.29843
0.00176	0.09968	0.00176	0.0657		0.01762	1.83656e-14	0.01762	0.25083	0.29816		0.01762	0.29799
0.00176	0.09947	0.00176	0.06553		0.01763	1.78194e-14	0.01763	0.25043	0.29763		0.01763	0.29756
0.00176	0.09927	0.00176	0.06537		0.01765	1.72895e-14	0.01765	0.25002	0.2971		0.01765	0.29712
0.00177	0.09906	0.00177	0.06521		0.01766	1.67754e-14	0.01766	0.24962	0.29657		0.01766	0.29668
0.00177	0.09885	0.00177	0.06505		0.01768	1.62765e-14	0.01768	0.24921	0.29604		0.01768	0.29625
0.00177	0.09864	0.00177	0.06489		0.0177	1.57925e-14	0.0177	0.24881	0.29551		0.0177	0.29581
0.00177	0.09844	0.00177	0.06473		0.01771	1.53229e-14	0.01771	0.2484	0.29498		0.01771	0.29538
0.00177	0.09823	0.00177	0.06457		0.01773	1.48672e-14	0.01773	0.248	0.29445		0.01773	0.29495
0.00177	0.09803	0.00177	0.06441		0.01774	1.44251e-14	0.01774	0.2476	0.29391		0.01774	0.29452
0.00178	0.09782	0.00178	0.06425		0.01776	1.39961e-14	0.01776	0.24719	0.29338		0.01776	0.29408
0.00178	0.09762	0.00178	0.06409		0.01778	1.35799e-14	0.01778	0.24679	0.29285		0.01778	0.29365
0.00178	0.09741	0.00178	0.06393		0.01779	1.31761e-14	0.01779	0.24639	0.29232		0.01779	0.29322
0.00178	0.09721	0.00178	0.06377		0.01781	1.27843e-14	0.01781	0.24599	0.29179		0.01781	0.29279
0.00178	0.09701	0.00178	0.06362		0.01782	1.24041e-14	0.01782	0.24559	0.29126		0.01782	0.29236
0.00178	0.0968	0.00178	0.06346		0.01784	1.20352e-14	0.01784	0.24519	0.29073		0.01784	0.29193
0.00179	0.0966	0.00179	0.0633		0.01786	1.16773e-14	0.01786	0.2448	0.2902		0.01786	0.2915
0.00179	0.0964	0.00179	0.06315		0.01787	1.13301e-14	0.01787	0.2444	0.28984		0.01787	0.29108
0.00179	0.0962	0.00179	0.06299		0.01789	1.09931e-14	0.01789	0.244	0.28948		0.01789	0.29065
0.00179	0.096	0.00179	0.06284		0.0179	1.06662e-14	0.0179	0.24361	0.28913		0.0179	0.29022
0.00179	0.09579	0.00179	0.06268		0.01792	1.0349e-14	0.01792	0.24321	0.28877		0.01792	0.2898
0.00179	0.09559	0.00179	0.06253		0.01794	1.00413e-14	0.01794	0.24282	0.28841		0.01794	0.28937
0.0018	0.09539	0.0018	0.06237		0.01795	9.74268e-15	0.01795	0.24242	0.28805		0.01795	0.28895
0.0018	0.09519	0.0018	0.06222		0.01797	9.45296e-15	0.01797	0.24203	0.28769		0.01797	0.28852
0.0018	0.095	0.0018	0.06206		0.01798	9.17185e-15	0.01798	0.24164	0.28733		0.01798	0.2881
0.0018	0.0948	0.0018	0.06191		0.018	8.8991e-15	0.018	0.24124	0.28698		0.018	0.28768
0.0018	0.0946	0.0018	0.06176		0.01802	8.63446e-15	0.01802	0.24085	0.28662		0.01802	0.28726
0.0018	0.0944	0.0018	0.0616		0.01803	8.37769e-15	0.01803	0.24046	0.28626		0.01803	0.28684
0.0018	0.0942	0.0018	0.06145		0.01805	8.12856e-15	0.01805	0.24007	0.2859		0.01805	0.28641
0.00181	0.09401	0.00181	0.0613		0.01806	7.88684e-15	0.01806	0.23968	0.28554		0.01806	0.28599
0.00181	0.09381	0.00181	0.06115		0.01808	7.6523e-15	0.01808	0.23929	0.28519		0.01808	0.28558
0.00181	0.09361	0.00181	0.061		0.0181	7.42474e-15	0.0181	0.2389	0.28483		0.0181	0.28516
0.00181	0.09342	0.00181	0.06085		0.01811	7.20395e-15	0.01811	0.23852	0.28447		0.01811	0.28474
0.00181	0.09322	0.00181	0.0607		0.01813	6.98972e-15	0.01813	0.23813	0.28411		0.01813	0.28432
0.00181	0.09303	0.00181	0.06055		0.01814	6.78186e-15	0.01814	0.23774	0.28375		0.01814	0.2839
0.00182	0.09283	0.00182	0.0604		0.01816	6.58019e-15	0.01816	0.23736	0.2834		0.01816	0.28349
0.00182	0.09264	0.00182	0.06025		0.01818	6.38451e-15	0.01818	0.23697	0.28304		0.01818	0.28307
0.00182	0.09244	0.00182	0.0601		0.01819	6.19465e-15	0.01819	0.23659	0.28268		0.01819	0.28266
0.00182	0.09225	0.00182	0.05995		0.01821	6.01044e-15	0.01821	0.2362	0.28232		0.01821	0.28224
0.00182	0.09206	0.00182	0.0598		0.01822	5.8317e-15	0.01822	0.23582	0.28196		0.01822	0.28183
0.00182	0.09187	0.00182	0.05966		0.01824	5.65828e-15	0.01824	0.23544	0.2816		0.01824	0.28141
0.00183	0.09167	0.00183	0.05951		0.01826	5.49002e-15	0.01826	0.23505	0.28125		0.01826	0.281
0.00183	0.09148	0.00183	0.05936		0.01827	5.32676e-15	0.01827	0.23467	0.28089		0.01827	0.28059
0.00183	0.09129	0.00183	0.05921		0.01829	5.16835e-15	0.01829	0.23429	0.28053		0.01829	0.28018
0.00183	0.0911	0.00183	0.05907		0.0183	5.01466e-15	0.0183	0.23391	0.28017		0.0183	0.27977
0.00183	0.09091	0.00183	0.05892		0.01832	4.86553e-15	0.01832	0.23353	0.27981		0.01832	0.27936
0.00183	0.09072	0.00183	0.05878		0.01834	4.72085e-15	0.01834	0.23315	0.27946		0.01834	0.27895
0.00184	0.09053	0.00184	0.05863		0.01835	4.58046e-15	0.01835	0.23278	0.2791		0.01835	0.27854
0.00184	0.09034	0.00184	0.05849		0.01837	4.44425e-15	0.01837	0.2324	0.27874		0.01837	0.27813
0.00184	0.09015	0.00184	0.05834		0.01838	4.31209e-15	0.01838	0.23202	0.27838		0.01838	0.27772
0.00184	0.08996	0.00184	0.0582		0.0184	4.18386e-15	0.0184	0.23164	0.27802		0.0184	0.27731
0.00184	0.08977	0.00184	0.05805		0.01842	4.05944e-15	0.01842	0.23127	0.27767		0.01842	0.27691
0.00184	0.08959	0.00184	0.05791		0.01843	3.93872e-15	0.01843	0.23089	0.27731		0.01843	0.2765
0.00184	0.0894	0.00184	0.05777		0.01845	3.82159e-15	0.01845	0.23052	0.27695		0.01845	0.27609
0.00185	0.08921	0.00185	0.05763		0.01846	3.70795e-15	0.01846	0.23014	0.27659		0.01846	0.27569
0.00185	0.08902	0.00185	0.05748		0.01848	3.59768e-15	0.01848	0.22977	0.27623		0.01848	0.27529
0.00185	0.08884	0.00185	0.05734		0.0185	3.4907e-15	0.0185	0.2294	0.27587		0.0185	0.27488
0.00185	0.08865	0.00185	0.0572		0.01851	3.38689e-15	0.01851	0.22902	0.27552		0.01851	0.27448
0.00185	0.08847	0.00185	0.05706		0.01853	3.28617e-15	0.01853	0.22865	0.27516		0.01853	0.27408
0.00185	0.08828	0.00185	0.05692		0.01854	3.18845e-15	0.01854	0.22828	0.2748		0.01854	0.27367
0.00186	0.0881	0.00186	0.05678		0.01856	3.09363e-15	0.01856	0.22791	0.27444		0.01856	0.27327
0.00186	0.08791	0.00186	0.05664		0.01858	3.00164e-15	0.01858	0.22754	0.27408		0.01858	0.27287
0.00186	0.08773	0.00186	0.0565		0.01859	2.91238e-15	0.01859	0.22717	0.27373		0.01859	0.27247
0.00186	0.08755	0.00186	0.05636		0.01861	2.82577e-15	0.01861	0.2268	0.27337		0.01861	0.27207
0.00186	0.08736	0.00186	0.05622		0.01862	2.74174e-15	0.01862	0.22644	0.27301		0.01862	0.27167
0.00186	0.08718	0.00186	0.05608		0.01864	2.6602e-15	0.01864	0.22607	0.27265		0.01864	0.27127
0.00187	0.087	0.00187	0.05594		0.01866	2.5811e-15	0.01866	0.2257	0.27229		0.01866	0.27088
0.00187	0.08681	0.00187	0.0558		0.01867	2.50434e-15	0.01867	0.22533	0.27194		0.01867	0.27048
0.00187	0.08663	0.00187	0.05566		0.01869	2.42987e-15	0.01869	0.22497	0.27158		0.01869	0.27008
0.00187	0.08645	0.00187	0.05553		0.0187	2.35761e-15	0.0187	0.2246	0.27122		0.0187	0.26969
0.00187	0.08627	0.00187	0.05539		0.01872	2.2875e-15	0.01872	0.22424	0.27086		0.01872	0.26929
0.00187	0.08609	0.00187	0.05525		0.01874	2.21948e-15	0.01874	0.22388	0.2705		0.01874	0.2689
0.00188	0.08591	0.00188	0.05512		0.01875	2.15347e-15	0.01875	0.22351	0.27014		0.01875	0.2685
0.00188	0.08573	0.00188	0.05498		0.01877	2.08943e-15	0.01877	0.22315	0.26979		0.01877	0.26811
0.00188	0.08555	0.00188	0.05484		0.01878	2.0273e-15	0.01878	0.22279	0.26943		0.01878	0.26771
0.00188	0.08537	0.00188	0.05471		0.0188	1.96701e-15	0.0188	0.22243	0.26907		0.0188	0.26732
0.00188	0.08519	0.00188	0.05457		0.01882	1.90852e-15	0.01882	0.22206	0.26871		0.01882	0.26693
0.00188	0.08502	0.00188	0.05444		0.01883	1.85176e-15	0.01883	0.2217	0.26835		0.01883	0.26654
0.00188	0.08484	0.00188	0.05431		0.01885	1.7967e-15	0.01885	0.22134	0.268		0.01885	0.26615
0.00189	0.08466	0.00189	0.05417		0.01886	1.74327e-15	0.01886	0.22098	0.26764		0.01886	0.26576
0.00189	0.08448	0.00189	0.05404		0.01888	1.69143e-15	0.01888	0.22063	0.26728		0.01888	0.26537
0.00189	0.08431	0.00189	0.0539		0.0189	1.64113e-15	0.0189	0.22027	0.26692		0.0189	0.26498
0.00189	0.08413	0.00189	0.05377		0.01891	1.59233e-15	0.01891	0.21991	0.26656		0.01891	0.26459
0.00189	0.08395	0.00189	0.05364		0.01893	1.54497e-15	0.01893	0.21955	0.26621		0.01893	0.2642
0.00189	0.08378	0.00189	0.05351		0.01894	1.49903e-15	0.01894	0.2192	0.26585		0.01894	0.26381
0.0019	0.0836	0.0019	0.05337		0.01896	1.45445e-15	0.01896	0.21884	0.26549		0.01896	0.26343
0.0019	0.08343	0.0019	0.05324		0.01898	1.4112e-15	0.01898	0.21849	0.26513		0.01898	0.26304
0.0019	0.08325	0.0019	0.05311		0.01899	1.36923e-15	0.01899	0.21813	0.26477		0.01899	0.26265
0.0019	0.08308	0.0019	0.05298		0.01901	1.32852e-15	0.01901	0.21778	0.26442		0.01901	0.26227
0.0019	0.08291	0.0019	0.05285		0.01902	1.28901e-15	0.01902	0.21742	0.26406		0.01902	0.26188
0.0019	0.08273	0.0019	0.05272		0.01904	1.25068e-15	0.01904	0.21707	0.2637		0.01904	0.2615
0.00191	0.08256	0.00191	0.05259		0.01906	1.21349e-15	0.01906	0.21672	0.26334		0.01906	0.26112
0.00191	0.08239	0.00191	0.05246		0.01907	1.1774e-15	0.01907	0.21637	0.26298		0.01907	0.26073
0.00191	0.08221	0.00191	0.05233		0.01909	1.14239e-15	0.01909	0.21602	0.26262		0.01909	0.26035
0.00191	0.08204	0.00191	0.0522		0.0191	1.10842e-15	0.0191	0.21567	0.26227		0.0191	0.25997
0.00191	0.08187	0.00191	0.05207		0.01912	1.07545e-15	0.01912	0.21532	0.26191		0.01912	0.25959
0.00191	0.0817	0.00191	0.05194		0.01914	1.04347e-15	0.01914	0.21497	0.26155		0.01914	0.25921
0.00192	0.08153	0.00192	0.05181		0.01915	1.01244e-15	0.01915	0.21462	0.26119		0.01915	0.25883
0.00192	0.08136	0.00192	0.05168		0.01917	9.82334e-16	0.01917	0.21427	0.26083		0.01917	0.25845
0.00192	0.08119	0.00192	0.05156		0.01918	9.53122e-16	0.01918	0.21392	0.26048		0.01918	0.25807
0.00192	0.08102	0.00192	0.05143		0.0192	9.24779e-16	0.0192	0.21357	0.26012		0.0192	0.25769
0.00192	0.08085	0.00192	0.0513		0.01922	8.97278e-16	0.01922	0.21323	0.25976		0.01922	0.25731
0.00192	0.08068	0.00192	0.05118		0.01923	8.70595e-16	0.01923	0.21288	0.2594		0.01923	0.25693
0.00192	0.08051	0.00192	0.05105		0.01925	8.44706e-16	0.01925	0.21254	0.25904		0.01925	0.25656
0.00193	0.08034	0.00193	0.05092		0.01926	8.19586e-16	0.01926	0.21219	0.25869		0.01926	0.25618
0.00193	0.08017	0.00193	0.0508		0.01928	7.95214e-16	0.01928	0.21185	0.25833		0.01928	0.2558
0.00193	0.08001	0.00193	0.05067		0.0193	7.71566e-16	0.0193	0.2115	0.25797		0.0193	0.25543
0.00193	0.07984	0.00193	0.05055		0.01931	7.48622e-16	0.01931	0.21116	0.25761		0.01931	0.25505
0.00193	0.07967	0.00193	0.05042		0.01933	7.26359e-16	0.01933	0.21082	0.25725		0.01933	0.25468
0.00193	0.0795	0.00193	0.0503		0.01934	7.04759e-16	0.01934	0.21047	0.25689		0.01934	0.25431
0.00194	0.07934	0.00194	0.05017		0.01936	6.83802e-16	0.01936	0.21013	0.25654		0.01936	0.25393
0.00194	0.07917	0.00194	0.05005		0.01938	6.63467e-16	0.01938	0.20979	0.25618		0.01938	0.25356
0.00194	0.07901	0.00194	0.04993		0.01939	6.43737e-16	0.01939	0.20945	0.25582		0.01939	0.25319
0.00194	0.07884	0.00194	0.0498		0.01941	6.24594e-16	0.01941	0.20911	0.25546		0.01941	0.25282
0.00194	0.07868	0.00194	0.04968		0.01942	6.0602e-16	0.01942	0.20877	0.2551		0.01942	0.25245
0.00194	0.07851	0.00194	0.04956		0.01944	5.87998e-16	0.01944	0.20843	0.25475		0.01944	0.25208
0.00195	0.07835	0.00195	0.04943		0.01946	5.70513e-16	0.01946	0.20809	0.25439		0.01946	0.25171
0.00195	0.07818	0.00195	0.04931		0.01947	5.53547e-16	0.01947	0.20776	0.25403		0.01947	0.25134
0.00195	0.07802	0.00195	0.04919		0.01949	5.37086e-16	0.01949	0.20742	0.25367		0.01949	0.25097
0.00195	0.07786	0.00195	0.04907		0.0195	5.21114e-16	0.0195	0.20708	0.25331		0.0195	0.2506
0.00195	0.07769	0.00195	0.04895		0.01952	5.05618e-16	0.01952	0.20675	0.25296		0.01952	0.25023
0.00195	0.07753	0.00195	0.04883		0.01954	4.90582e-16	0.01954	0.20641	0.2526		0.01954	0.24987
0.00196	0.07737	0.00196	0.04871		0.01955	4.75993e-16	0.01955	0.20608	0.25224		0.01955	0.2495
0.00196	0.07721	0.00196	0.04859		0.01957	4.61838e-16	0.01957	0.20574	0.25188		0.01957	0.24913
0.00196	0.07705	0.00196	0.04847		0.01958	4.48104e-16	0.01958	0.20541	0.25152		0.01958	0.24877
0.00196	0.07688	0.00196	0.04835		0.0196	4.34779e-16	0.0196	0.20507	0.25116		0.0196	0.2484
0.00196	0.07672	0.00196	0.04823		0.01962	4.2185e-16	0.01962	0.20474	0.25081		0.01962	0.24804
0.00196	0.07656	0.00196	0.04811		0.01963	4.09305e-16	0.01963	0.20441	0.25045		0.01963	0.24768
0.00196	0.0764	0.00196	0.04799		0.01965	3.97133e-16	0.01965	0.20408	0.25009		0.01965	0.24731
0.00197	0.07624	0.00197	0.04787		0.01966	3.85323e-16	0.01966	0.20375	0.24973		0.01966	0.24695
0.00197	0.07608	0.00197	0.04775		0.01968	3.73865e-16	0.01968	0.20342	0.24937		0.01968	0.24659
0.00197	0.07592	0.00197	0.04763		0.0197	3.62747e-16	0.0197	0.20309	0.24902		0.0197	0.24623
0.00197	0.07577	0.00197	0.04752		0.01971	3.5196e-16	0.01971	0.20276	0.24866		0.01971	0.24586
0.00197	0.07561	0.00197	0.0474		0.01973	3.41493e-16	0.01973	0.20243	0.2483		0.01973	0.2455
0.00197	0.07545	0.00197	0.04728		0.01974	3.31338e-16	0.01974	0.2021	0.24794		0.01974	0.24514
0.00198	0.07529	0.00198	0.04717		0.01976	3.21485e-16	0.01976	0.20177	0.24758		0.01976	0.24478
0.00198	0.07513	0.00198	0.04705		0.01978	3.11925e-16	0.01978	0.20144	0.24723		0.01978	0.24442
0.00198	0.07498	0.00198	0.04693		0.01979	3.02649e-16	0.01979	0.20112	0.24687		0.01979	0.24407
0.00198	0.07482	0.00198	0.04682		0.01981	2.93649e-16	0.01981	0.20079	0.24651		0.01981	0.24371
0.00198	0.07466	0.00198	0.0467		0.01982	2.84916e-16	0.01982	0.20046	0.24615		0.01982	0.24335
0.00198	0.07451	0.00198	0.04659		0.01984	2.76444e-16	0.01984	0.20014	0.24579		0.01984	0.24299
0.00199	0.07435	0.00199	0.04647		0.01986	2.68223e-16	0.01986	0.19981	0.24544		0.01986	0.24264
0.00199	0.0742	0.00199	0.04636		0.01987	2.60247e-16	0.01987	0.19949	0.24508		0.01987	0.24228
0.00199	0.07404	0.00199	0.04624		0.01989	2.52508e-16	0.01989	0.19917	0.24472		0.01989	0.24193
0.00199	0.07389	0.00199	0.04613		0.0199	2.44999e-16	0.0199	0.19884	0.24436		0.0199	0.24157
0.00199	0.07373	0.00199	0.04601		0.01992	2.37713e-16	0.01992	0.19852	0.244		0.01992	0.24122
0.00199	0.07358	0.00199	0.0459		0.01994	2.30644e-16	0.01994	0.1982	0.24364		0.01994	0.24086
0.002	0.07342	0.002	0.04579		0.01995	2.23785e-16	0.01995	0.19788	0.24329		0.01995	0.24051
0.002	0.07327	0.002	0.04567		0.01997	2.1713e-16	0.01997	0.19755	0.24293		0.01997	0.24016
0.002	0.07312	0.002	0.04556		0.01998	2.10673e-16	0.01998	0.19723	0.24257		0.01998	0.2398
0.002	0.07296	0.002	0.04545		0.02	2.04409e-16	0.02	0.19691	0.24221		0.02	0.23945
0.002	0.07281	0.002	0.04534		0.02002	1.9833e-16	0.02002	0.19659	0.24185		0.02002	0.2391
0.002	0.07266	0.002	0.04522		0.02003	1.92432e-16	0.02003	0.19627	0.2415		0.02003	0.23875
0.002	0.07251	0.002	0.04511		0.02005	1.8671e-16	0.02005	0.19596	0.24114		0.02005	0.2384
0.00201	0.07235	0.00201	0.045		0.02006	1.81157e-16	0.02006	0.19564	0.24078		0.02006	0.23805
0.00201	0.0722	0.00201	0.04489		0.02008	1.7577e-16	0.02008	0.19532	0.24042		0.02008	0.2377
0.00201	0.07205	0.00201	0.04478		0.0201	1.70543e-16	0.0201	0.195	0.24006		0.0201	0.23735
0.00201	0.0719	0.00201	0.04467		0.02011	1.65472e-16	0.02011	0.19469	0.23971		0.02011	0.23701
0.00201	0.07175	0.00201	0.04456		0.02013	1.60551e-16	0.02013	0.19437	0.23935		0.02013	0.23666
0.00201	0.0716	0.00201	0.04445		0.02014	1.55777e-16	0.02014	0.19406	0.23899		0.02014	0.23631
0.00202	0.07145	0.00202	0.04434		0.02016	1.51144e-16	0.02016	0.19374	0.23863		0.02016	0.23596
0.00202	0.0713	0.00202	0.04423		0.02018	1.46649e-16	0.02018	0.19343	0.23827		0.02018	0.23562
0.00202	0.07115	0.00202	0.04412		0.02019	1.42288e-16	0.02019	0.19311	0.23791		0.02019	0.23527
0.00202	0.071	0.00202	0.04401		0.02021	1.38057e-16	0.02021	0.1928	0.23756		0.02021	0.23493
0.00202	0.07085	0.00202	0.0439		0.02022	1.33952e-16	0.02022	0.19249	0.2372		0.02022	0.23458
0.00202	0.07071	0.00202	0.04379		0.02024	1.29968e-16	0.02024	0.19217	0.23684		0.02024	0.23424
0.00203	0.07056	0.00203	0.04368		0.02026	1.26103e-16	0.02026	0.19186	0.23648		0.02026	0.23389
0.00203	0.07041	0.00203	0.04358		0.02027	1.22353e-16	0.02027	0.19155	0.23612		0.02027	0.23355
0.00203	0.07026	0.00203	0.04347		0.02029	1.18715e-16	0.02029	0.19124	0.23577		0.02029	0.23321
0.00203	0.07012	0.00203	0.04336		0.0203	1.15185e-16	0.0203	0.19093	0.23541		0.0203	0.23287
0.00203	0.06997	0.00203	0.04325		0.02032	1.11759e-16	0.02032	0.19062	0.23505		0.02032	0.23253
0.00203	0.06982	0.00203	0.04315		0.02034	1.08436e-16	0.02034	0.19031	0.23469		0.02034	0.23218
0.00204	0.06968	0.00204	0.04304		0.02035	1.05211e-16	0.02035	0.19	0.23433		0.02035	0.23184
0.00204	0.06953	0.00204	0.04293		0.02037	1.02082e-16	0.02037	0.18969	0.23398		0.02037	0.2315
0.00204	0.06939	0.00204	0.04283		0.02038	9.90468e-17	0.02038	0.18938	0.23362		0.02038	0.23116
0.00204	0.06924	0.00204	0.04272		0.0204	9.61014e-17	0.0204	0.18908	0.23326		0.0204	0.23083
0.00204	0.0691	0.00204	0.04262		0.02042	9.32435e-17	0.02042	0.18877	0.2329		0.02042	0.23049
0.00204	0.06895	0.00204	0.04251		0.02043	9.04707e-17	0.02043	0.18846	0.23254		0.02043	0.23015
0.00204	0.06881	0.00204	0.04241		0.02045	8.77803e-17	0.02045	0.18816	0.23218		0.02045	0.22981
0.00205	0.06866	0.00205	0.0423		0.02046	8.517e-17	0.02046	0.18785	0.23183		0.02046	0.22947
0.00205	0.06852	0.00205	0.0422		0.02048	8.26372e-17	0.02048	0.18755	0.23147		0.02048	0.22914
0.00205	0.06838	0.00205	0.04209		0.0205	8.01798e-17	0.0205	0.18724	0.23111		0.0205	0.2288
0.00205	0.06823	0.00205	0.04199		0.02051	7.77954e-17	0.02051	0.18694	0.23075		0.02051	0.22847
0.00205	0.06809	0.00205	0.04189		0.02053	7.5482e-17	0.02053	0.18664	0.23039		0.02053	0.22813
0.00205	0.06795	0.00205	0.04178		0.02054	7.32373e-17	0.02054	0.18633	0.23004		0.02054	0.2278
0.00206	0.06781	0.00206	0.04168		0.02056	7.10594e-17	0.02056	0.18603	0.22968		0.02056	0.22746
0.00206	0.06766	0.00206	0.04158		0.02058	6.89463e-17	0.02058	0.18573	0.22932		0.02058	0.22713
0.00206	0.06752	0.00206	0.04147		0.02059	6.6896e-17	0.02059	0.18543	0.22896		0.02059	0.22679
0.00206	0.06738	0.00206	0.04137		0.02061	6.49067e-17	0.02061	0.18513	0.2286		0.02061	0.22646
0.00206	0.06724	0.00206	0.04127		0.02062	6.29765e-17	0.02062	0.18483	0.22825		0.02062	0.22613
0.00206	0.0671	0.00206	0.04117		0.02064	6.11038e-17	0.02064	0.18453	0.22789		0.02064	0.2258
0.00207	0.06696	0.00207	0.04107		0.02066	5.92867e-17	0.02066	0.18423	0.22753		0.02066	0.22547
0.00207	0.06682	0.00207	0.04096		0.02067	5.75236e-17	0.02067	0.18393	0.22717		0.02067	0.22514
0.00207	0.06668	0.00207	0.04086		0.02069	5.5813e-17	0.02069	0.18363	0.22681		0.02069	0.22481
0.00207	0.06654	0.00207	0.04076		0.0207	5.41533e-17	0.0207	0.18333	0.22646		0.0207	0.22448
0.00207	0.0664	0.00207	0.04066		0.02072	5.25429e-17	0.02072	0.18303	0.2261		0.02072	0.22415
0.00207	0.06626	0.00207	0.04056		0.02074	5.09804e-17	0.02074	0.18274	0.22574		0.02074	0.22382
0.00208	0.06612	0.00208	0.04046		0.02075	4.94644e-17	0.02075	0.18244	0.22538		0.02075	0.22349
0.00208	0.06599	0.00208	0.04036		0.02077	4.79934e-17	0.02077	0.18214	0.22502		0.02077	0.22316
0.00208	0.06585	0.00208	0.04026		0.02078	4.65662e-17	0.02078	0.18185	0.22466		0.02078	0.22283
0.00208	0.06571	0.00208	0.04016		0.0208	4.51814e-17	0.0208	0.18155	0.22431		0.0208	0.22251
0.00208	0.06557	0.00208	0.04006		0.02082	4.38379e-17	0.02082	0.18126	0.22395		0.02082	0.22218
0.00208	0.06543	0.00208	0.03996		0.02083	4.25342e-17	0.02083	0.18096	0.22359		0.02083	0.22186
0.00208	0.0653	0.00208	0.03986		0.02085	4.12694e-17	0.02085	0.18067	0.22323		0.02085	0.22153
0.00209	0.06516	0.00209	0.03977		0.02086	4.00421e-17	0.02086	0.18038	0.22287		0.02086	0.22121
0.00209	0.06502	0.00209	0.03967		0.02088	3.88514e-17	0.02088	0.18008	0.22252		0.02088	0.22088
0.00209	0.06489	0.00209	0.03957		0.0209	3.7696e-17	0.0209	0.17979	0.22216		0.0209	0.22056
0.00209	0.06475	0.00209	0.03947		0.02091	3.6575e-17	0.02091	0.1795	0.2218		0.02091	0.22023
0.00209	0.06462	0.00209	0.03938		0.02093	3.54874e-17	0.02093	0.17921	0.22144		0.02093	0.21991
0.00209	0.06448	0.00209	0.03928		0.02094	3.44321e-17	0.02094	0.17892	0.22108		0.02094	0.21959
0.0021	0.06435	0.0021	0.03918		0.02096	3.34081e-17	0.02096	0.17863	0.22073		0.02096	0.21927
0.0021	0.06421	0.0021	0.03908		0.02098	3.24147e-17	0.02098	0.17834	0.22037		0.02098	0.21894
0.0021	0.06408	0.0021	0.03899		0.02099	3.14507e-17	0.02099	0.17805	0.22001		0.02099	0.21862
0.0021	0.06394	0.0021	0.03889		0.02101	3.05155e-17	0.02101	0.17776	0.21965		0.02101	0.2183
0.0021	0.06381	0.0021	0.0388		0.02102	2.9608e-17	0.02102	0.17747	0.21929		0.02102	0.21798
0.0021	0.06368	0.0021	0.0387		0.02104	2.87275e-17	0.02104	0.17718	0.21893		0.02104	0.21766
0.00211	0.06354	0.00211	0.0386		0.02106	2.78733e-17	0.02106	0.17689	0.21858		0.02106	0.21734
0.00211	0.06341	0.00211	0.03851		0.02107	2.70444e-17	0.02107	0.17661	0.21822		0.02107	0.21702
0.00211	0.06328	0.00211	0.03841		0.02109	2.62401e-17	0.02109	0.17632	0.21786		0.02109	0.21671
0.00211	0.06315	0.00211	0.03832		0.0211	2.54598e-17	0.0211	0.17603	0.2175		0.0211	0.21639
0.00211	0.06301	0.00211	0.03822		0.02112	2.47027e-17	0.02112	0.17575	0.21714		0.02112	0.21607
0.00211	0.06288	0.00211	0.03813		0.02114	2.39681e-17	0.02114	0.17546	0.21679		0.02114	0.21575
0.00212	0.06275	0.00212	0.03804		0.02115	2.32554e-17	0.02115	0.17518	0.21643		0.02115	0.21544
0.00212	0.06262	0.00212	0.03794		0.02117	2.25638e-17	0.02117	0.17489	0.21607		0.02117	0.21512
0.00212	0.06249	0.00212	0.03785		0.02118	2.18928e-17	0.02118	0.17461	0.21571		0.02118	0.21481
0.00212	0.06236	0.00212	0.03775		0.0212	2.12418e-17	0.0212	0.17433	0.21535		0.0212	0.21449
0.00212	0.06223	0.00212	0.03766		0.02122	2.06101e-17	0.02122	0.17404	0.215		0.02122	0.21418
0.00212	0.0621	0.00212	0.03757		0.02123	1.99972e-17	0.02123	0.17376	0.21464		0.02123	0.21386
0.00212	0.06197	0.00212	0.03748		0.02125	1.94025e-17	0.02125	0.17348	0.21428		0.02125	0.21355
0.00213	0.06184	0.00213	0.03738		0.02126	1.88255e-17	0.02126	0.1732	0.21392		0.02126	0.21323
0.00213	0.06171	0.00213	0.03729		0.02128	1.82657e-17	0.02128	0.17292	0.21356		0.02128	0.21292
0.00213	0.06158	0.00213	0.0372		0.0213	1.77225e-17	0.0213	0.17264	0.2132		0.0213	0.21261
0.00213	0.06145	0.00213	0.03711		0.02131	1.71955e-17	0.02131	0.17236	0.21285		0.02131	0.2123
0.00213	0.06132	0.00213	0.03701		0.02133	1.66842e-17	0.02133	0.17208	0.21249		0.02133	0.21199
0.00213	0.06119	0.00213	0.03692		0.02134	1.6188e-17	0.02134	0.1718	0.21213		0.02134	0.21168
0.00214	0.06107	0.00214	0.03683		0.02136	1.57066e-17	0.02136	0.17152	0.21177		0.02136	0.21137
0.00214	0.06094	0.00214	0.03674		0.02138	1.52396e-17	0.02138	0.17124	0.21141		0.02138	0.21106
0.00214	0.06081	0.00214	0.03665		0.02139	1.47864e-17	0.02139	0.17096	0.21106		0.02139	0.21075
0.00214	0.06068	0.00214	0.03656		0.02141	1.43467e-17	0.02141	0.17068	0.2107		0.02141	0.21044
0.00214	0.06056	0.00214	0.03647		0.02142	1.392e-17	0.02142	0.17041	0.21034		0.02142	0.21013
0.00214	0.06043	0.00214	0.03638		0.02144	1.35061e-17	0.02144	0.17013	0.20998		0.02144	0.20982
0.00215	0.0603	0.00215	0.03629		0.02146	1.31044e-17	0.02146	0.16986	0.20962		0.02146	0.20951
0.00215	0.06018	0.00215	0.0362		0.02147	1.27147e-17	0.02147	0.16958	0.20927		0.02147	0.2092
0.00215	0.06005	0.00215	0.03611		0.02149	1.23366e-17	0.02149	0.1693	0.20891		0.02149	0.2089
0.00215	0.05993	0.00215	0.03602		0.0215	1.19698e-17	0.0215	0.16903	0.20855		0.0215	0.20859
0.00215	0.0598	0.00215	0.03593		0.02152	1.16138e-17	0.02152	0.16876	0.20819		0.02152	0.20829
0.00215	0.05967	0.00215	0.03584		0.02154	1.12685e-17	0.02154	0.16848	0.20783		0.02154	0.20798
0.00216	0.05955	0.00216	0.03575		0.02155	1.09334e-17	0.02155	0.16821	0.20748		0.02155	0.20767
0.00216	0.05943	0.00216	0.03567		0.02157	1.06082e-17	0.02157	0.16793	0.20712		0.02157	0.20737
0.00216	0.0593	0.00216	0.03558		0.02158	1.02928e-17	0.02158	0.16766	0.20676		0.02158	0.20707
0.00216	0.05918	0.00216	0.03549		0.0216	9.98668e-18	0.0216	0.16739	0.2064		0.0216	0.20676
0.00216	0.05905	0.00216	0.0354		0.02162	9.6897e-18	0.02162	0.16712	0.20604		0.02162	0.20646
0.00216	0.05893	0.00216	0.03532		0.02163	9.40156e-18	0.02163	0.16685	0.20568		0.02163	0.20616
0.00216	0.05881	0.00216	0.03523		0.02165	9.12198e-18	0.02165	0.16658	0.20533		0.02165	0.20585
0.00217	0.05868	0.00217	0.03514		0.02166	8.85071e-18	0.02166	0.16631	0.20497		0.02166	0.20555
0.00217	0.05856	0.00217	0.03505		0.02168	8.58751e-18	0.02168	0.16604	0.20461		0.02168	0.20525
0.00217	0.05844	0.00217	0.03497		0.0217	8.33214e-18	0.0217	0.16577	0.20425		0.0217	0.20495
0.00217	0.05832	0.00217	0.03488		0.02171	8.08436e-18	0.02171	0.1655	0.2039		0.02171	0.20465
0.00217	0.05819	0.00217	0.0348		0.02173	7.84395e-18	0.02173	0.16523	0.20364		0.02173	0.20435
0.00217	0.05807	0.00217	0.03471		0.02174	7.61069e-18	0.02174	0.16496	0.20338		0.02174	0.20405
0.00218	0.05795	0.00218	0.03462		0.02176	7.38437e-18	0.02176	0.16469	0.20312		0.02176	0.20375
0.00218	0.05783	0.00218	0.03454		0.02178	7.16478e-18	0.02178	0.16443	0.20287		0.02178	0.20345
0.00218	0.05771	0.00218	0.03445		0.02179	6.95172e-18	0.02179	0.16416	0.20261		0.02179	0.20315
0.00218	0.05759	0.00218	0.03437		0.02181	6.74499e-18	0.02181	0.16389	0.20235		0.02181	0.20285
0.00218	0.05747	0.00218	0.03428		0.02182	6.54441e-18	0.02182	0.16363	0.20209		0.02182	0.20256
0.00218	0.05735	0.00218	0.0342		0.02184	6.34979e-18	0.02184	0.16336	0.20183		0.02184	0.20226
0.00219	0.05723	0.00219	0.03411		0.02186	6.16097e-18	0.02186	0.1631	0.20158		0.02186	0.20196
0.00219	0.05711	0.00219	0.03403		0.02187	5.97775e-18	0.02187	0.16283	0.20132		0.02187	0.20167
0.00219	0.05699	0.00219	0.03395		0.02189	5.79999e-18	0.02189	0.16257	0.20106		0.02189	0.20137
0.00219	0.05687	0.00219	0.03386		0.0219	5.62751e-18	0.0219	0.1623	0.2008		0.0219	0.20108
0.00219	0.05675	0.00219	0.03378		0.02192	5.46017e-18	0.02192	0.16204	0.20054		0.02192	0.20078
0.00219	0.05663	0.00219	0.03369		0.02194	5.29779e-18	0.02194	0.16178	0.20029		0.02194	0.20049
0.0022	0.05651	0.0022	0.03361		0.02195	5.14025e-18	0.02195	0.16151	0.20003		0.02195	0.20019
0.0022	0.05639	0.0022	0.03353		0.02197	4.98739e-18	0.02197	0.16125	0.19977		0.02197	0.1999
0.0022	0.05628	0.0022	0.03345		0.02198	4.83908e-18	0.02198	0.16099	0.19951		0.02198	0.1996
0.0022	0.05616	0.0022	0.03336		0.022	4.69518e-18	0.022	0.16073	0.19925		0.022	0.19931
0.0022	0.05604	0.0022	0.03328		0.02202	4.55555e-18	0.02202	0.16047	0.199		0.02202	0.19902
0.0022	0.05592	0.0022	0.0332		0.02203	4.42008e-18	0.02203	0.16021	0.19874		0.02203	0.19873
0.0022	0.05581	0.0022	0.03312		0.02205	4.28864e-18	0.02205	0.15995	0.19848		0.02205	0.19844
0.00221	0.05569	0.00221	0.03303		0.02206	4.16111e-18	0.02206	0.15969	0.19822		0.02206	0.19815
0.00221	0.05557	0.00221	0.03295		0.02208	4.03736e-18	0.02208	0.15943	0.19796		0.02208	0.19785
0.00221	0.05546	0.00221	0.03287		0.0221	3.9173e-18	0.0221	0.15917	0.19771		0.0221	0.19756
0.00221	0.05534	0.00221	0.03279		0.02211	3.80081e-18	0.02211	0.15891	0.19745		0.02211	0.19727
0.00221	0.05523	0.00221	0.03271		0.02213	3.68779e-18	0.02213	0.15865	0.19719		0.02213	0.19699
[truncated: 2,617 more rows]

## Sheet:  Fig. 3(b)
For 980 nm pumping (Fig. 3(b))
[truncated: 4,003 more rows]

## Sheet: Fig. 5
	For 830 nm pumping (Fig. 5(a))											For 980 nm pumping (Fig.5(b))
[truncated: 102 more rows]

[truncated: 1 more sheets: estimatie for fiber composition]
